# Supplementary material for: In Silico Analysis of Nanoplastics’ and β-amyloid Fibrils’ Interactions
Source: MDPI journal article supplement (doi:10.3390/molecules28010388), 2023-01-02
Supplement: s1 [file s1]

# *In silico* analysis of nanoplastics and $\beta$ -amyloid fibrils interactions

Silvia Gabbrielli, Luca Colnaghi, Gemma Mazzuoli-Weber, Alberto Redaelli, Alfonso Gautieri

## 1.1 Polystyrene NP Coordinates

POLYSTYRENE

1800

|        |    |    |        |       |       |         |        |        |
|--------|----|----|--------|-------|-------|---------|--------|--------|
| 1STYR  | B  | 1  | 14.833 | 8.322 | 5.673 | -0.0485 | 0.1544 | 0.2538 |
| 1STYR  | R1 | 2  | 15.019 | 8.390 | 5.864 | -0.0636 | 0.1444 | 0.2689 |
| 1STYR  | R2 | 3  | 15.285 | 8.357 | 5.897 | -0.0619 | 0.1759 | 0.2879 |
| 1STYR  | R3 | 4  | 15.114 | 8.284 | 6.093 | -0.0661 | 0.1716 | 0.2826 |
| 2STYR  | B  | 5  | 14.639 | 8.252 | 5.787 | -0.0593 | 0.1367 | 0.2189 |
| 2STYR  | R1 | 6  | 14.722 | 8.070 | 5.635 | -0.0170 | 0.1345 | 0.2431 |
| 2STYR  | R2 | 7  | 14.762 | 7.805 | 5.671 | -0.0062 | 0.1363 | 0.2440 |
| 2STYR  | R3 | 8  | 14.638 | 7.893 | 5.448 | 0.0061  | 0.1318 | 0.2354 |
| 3STYR  | B  | 9  | 14.433 | 8.145 | 5.845 | -0.0443 | 0.1333 | 0.2108 |
| 3STYR  | R1 | 10 | 14.659 | 8.128 | 6.012 | -0.0856 | 0.1439 | 0.2521 |
| 3STYR  | R2 | 11 | 14.838 | 7.958 | 6.122 | -0.0685 | 0.1764 | 0.2751 |
| 3STYR  | R3 | 12 | 14.741 | 8.164 | 6.266 | -0.1172 | 0.1649 | 0.2594 |
| 4STYR  | B  | 13 | 14.205 | 8.105 | 5.904 | -0.0541 | 0.1067 | 0.1630 |
| 4STYR  | R1 | 14 | 14.295 | 7.941 | 5.724 | -0.0283 | 0.1099 | 0.2062 |
| 4STYR  | R2 | 15 | 14.321 | 7.676 | 5.681 | 0.0068  | 0.1100 | 0.2259 |
| 4STYR  | R3 | 16 | 14.200 | 7.831 | 5.496 | 0.0096  | 0.0845 | 0.2026 |
| 5STYR  | B  | 17 | 13.970 | 8.173 | 5.918 | -0.0532 | 0.0974 | 0.1599 |
| 5STYR  | R1 | 18 | 14.007 | 7.927 | 5.975 | -0.0488 | 0.1013 | 0.1505 |
| 5STYR  | R2 | 19 | 13.911 | 7.756 | 6.160 | -0.0629 | 0.1027 | 0.1445 |
| 5STYR  | R3 | 20 | 13.925 | 7.681 | 5.901 | -0.0146 | 0.0898 | 0.1507 |
| 6STYR  | B  | 21 | 13.906 | 8.419 | 5.877 | -0.0498 | 0.0933 | 0.1364 |
| 6STYR  | R1 | 22 | 13.725 | 8.234 | 5.803 | -0.0425 | 0.0380 | 0.1247 |
| 6STYR  | R2 | 23 | 13.577 | 8.165 | 5.588 | -0.0353 | 0.0892 | 0.1032 |
| 6STYR  | R3 | 24 | 13.463 | 8.178 | 5.833 | -0.0493 | 0.0557 | 0.0985 |
| 7STYR  | B  | 25 | 14.074 | 8.551 | 5.780 | -0.0589 | 0.1011 | 0.1270 |
| 7STYR  | R1 | 26 | 13.873 | 8.687 | 5.869 | -0.0849 | 0.0822 | 0.1266 |
| 7STYR  | R2 | 27 | 13.827 | 8.905 | 6.021 | -0.1179 | 0.0910 | 0.1042 |
| 7STYR  | R3 | 28 | 13.713 | 8.885 | 5.777 | -0.0931 | 0.0612 | 0.0950 |
| 8STYR  | B  | 29 | 14.289 | 8.540 | 5.663 | -0.0468 | 0.1024 | 0.1719 |
| 8STYR  | R1 | 30 | 14.060 | 8.423 | 5.551 | -0.0403 | 0.0777 | 0.1570 |
| 8STYR  | R2 | 31 | 13.974 | 8.191 | 5.444 | -0.0009 | 0.0724 | 0.1367 |
| 8STYR  | R3 | 32 | 13.896 | 8.426 | 5.337 | -0.0078 | 0.0678 | 0.1317 |
| 9STYR  | B  | 33 | 14.493 | 8.645 | 5.720 | -0.0690 | 0.1282 | 0.1991 |
| 9STYR  | R1 | 34 | 14.467 | 8.649 | 5.476 | -0.0461 | 0.1028 | 0.1917 |
| 9STYR  | R2 | 35 | 14.642 | 8.600 | 5.276 | -0.0247 | 0.0981 | 0.2115 |
| 9STYR  | R3 | 36 | 14.465 | 8.803 | 5.254 | -0.0220 | 0.0979 | 0.1881 |
| 10STYR | B  | 37 | 14.668 | 8.764 | 5.785 | -0.0689 | 0.1321 | 0.2132 |
| 10STYR | R1 | 38 | 14.408 | 8.822 | 5.853 | -0.0845 | 0.1142 | 0.1774 |
| 10STYR | R2 | 39 | 14.246 | 8.878 | 6.062 | -0.1219 | 0.1182 | 0.1472 |
| 10STYR | R3 | 40 | 14.194 | 8.982 | 5.818 | -0.0856 | 0.1029 | 0.1328 |
| 11STYR | B  | 41 | 14.876 | 8.871 | 5.788 | -0.0879 | 0.1340 | 0.2320 |
| 11STYR | R1 | 42 | 14.788 | 8.766 | 6.014 | -0.0915 | 0.1402 | 0.2326 |
| 11STYR | R2 | 43 | 14.879 | 8.608 | 6.213 | -0.1197 | 0.1515 | 0.2544 |
| 11STYR | R3 | 44 | 14.719 | 8.818 | 6.269 | -0.1327 | 0.1510 | 0.2193 |
| 12STYR | B  | 45 | 15.009 | 9.041 | 5.684 | -0.0641 | 0.1582 | 0.2353 |
| 12STYR | R1 | 46 | 15.062 | 8.789 | 5.618 | -0.0583 | 0.1436 | 0.2464 |
| 12STYR | R2 | 47 | 15.078 | 8.620 | 5.408 | -0.0262 | 0.1113 | 0.2746 |
| 12STYR | R3 | 48 | 15.280 | 8.632 | 5.586 | -0.0428 | 0.1562 | 0.2904 |
| 13STYR | B  | 49 | 14.989 | 9.277 | 5.668 | -0.1183 | 0.1289 | 0.2298 |
| 13STYR | R1 | 50 | 14.977 | 9.163 | 5.913 | -0.1156 | 0.1616 | 0.2205 |
| 13STYR | R2 | 51 | 14.814 | 9.186 | 6.127 | -0.1454 | 0.1655 | 0.1974 |
| 13STYR | R3 | 52 | 15.081 | 9.168 | 6.162 | -0.1489 | 0.1833 | 0.2340 |
| 14STYR | B  | 53 | 14.843 | 9.415 | 5.527 | -0.0925 | 0.1384 | 0.1963 |

|        |    |     |        |        |       |         |        |         |
|--------|----|-----|--------|--------|-------|---------|--------|---------|
| 14STYR | R1 | 54  | 14.929 | 9.187  | 5.421 | -0.0585 | 0.1380 | 0.2135  |
| 14STYR | R2 | 55  | 14.840 | 8.973  | 5.282 | -0.0309 | 0.1337 | 0.2022  |
| 14STYR | R3 | 56  | 15.043 | 9.122  | 5.185 | -0.0230 | 0.1409 | 0.2297  |
| 15STYR | B  | 57  | 14.670 | 9.575  | 5.494 | -0.1203 | 0.1226 | 0.1653  |
| 15STYR | R1 | 58  | 14.844 | 9.524  | 5.287 | -0.0572 | 0.1080 | 0.1881  |
| 15STYR | R2 | 59  | 14.843 | 9.466  | 5.023 | -0.0064 | 0.1014 | 0.1893  |
| 15STYR | R3 | 60  | 15.031 | 9.631  | 5.125 | -0.0567 | 0.1448 | 0.2129  |
| 16STYR | B  | 61  | 14.445 | 9.638  | 5.573 | -0.1091 | 0.1060 | 0.1232  |
| 16STYR | R1 | 62  | 14.536 | 9.380  | 5.603 | -0.1001 | 0.1204 | 0.1693  |
| 16STYR | R2 | 63  | 14.558 | 9.203  | 5.805 | -0.0763 | 0.1176 | 0.1643  |
| 16STYR | R3 | 64  | 14.501 | 9.116  | 5.556 | -0.0776 | 0.1183 | 0.1644  |
| 17STYR | B  | 65  | 14.312 | 9.842  | 5.532 | -0.1071 | 0.1126 | 0.0963  |
| 17STYR | R1 | 66  | 14.385 | 9.689  | 5.323 | -0.0774 | 0.1083 | 0.1355  |
| 17STYR | R2 | 67  | 14.501 | 9.719  | 5.081 | -0.0436 | 0.0867 | 0.1489  |
| 17STYR | R3 | 68  | 14.274 | 9.575  | 5.104 | -0.0373 | 0.0740 | 0.1330  |
| 18STYR | B  | 69  | 14.223 | 10.053 | 5.613 | -0.1260 | 0.0895 | 0.0979  |
| 18STYR | R1 | 70  | 14.271 | 10.026 | 5.351 | -0.1011 | 0.0967 | 0.0936  |
| 18STYR | R2 | 71  | 14.162 | 10.033 | 5.104 | -0.0714 | 0.0658 | 0.0795  |
| 18STYR | R3 | 72  | 14.407 | 10.138 | 5.146 | -0.0846 | 0.0882 | 0.0999  |
| 19STYR | B  | 73  | 14.014 | 10.130 | 5.717 | -0.1589 | 0.0890 | 0.0838  |
| 19STYR | R1 | 74  | 14.232 | 10.263 | 5.795 | -0.1675 | 0.1026 | 0.0758  |
| 19STYR | R2 | 75  | 14.358 | 10.349 | 6.019 | -0.2067 | 0.1219 | 0.0906  |
| 19STYR | R3 | 76  | 14.275 | 10.527 | 5.833 | -0.1880 | 0.1071 | 0.0680  |
| 20STYR | B  | 77  | 13.794 | 10.053 | 5.737 | -0.1478 | 0.0686 | 0.0349  |
| 20STYR | R1 | 78  | 13.837 | 10.263 | 5.875 | -0.1648 | 0.0950 | 0.0443  |
| 20STYR | R2 | 79  | 13.738 | 10.510 | 5.918 | -0.1850 | 0.0929 | 0.0108  |
| 20STYR | R3 | 80  | 13.818 | 10.359 | 6.127 | -0.2165 | 0.1095 | 0.0351  |
| 21STYR | B  | 81  | 13.637 | 9.930  | 5.870 | -0.1487 | 0.0732 | 0.0463  |
| 21STYR | R1 | 82  | 13.883 | 9.817  | 5.813 | -0.1320 | 0.0759 | 0.0649  |
| 21STYR | R2 | 83  | 14.108 | 9.711  | 5.918 | -0.1350 | 0.0888 | 0.0845  |
| 21STYR | R3 | 84  | 13.992 | 9.596  | 5.703 | -0.1187 | 0.0728 | 0.0843  |
| 22STYR | B  | 85  | 13.659 | 9.877  | 6.108 | -0.1969 | 0.0945 | 0.0214  |
| 22STYR | R1 | 86  | 13.470 | 10.043 | 6.066 | -0.1841 | 0.0802 | 0.0089  |
| 22STYR | R2 | 87  | 13.379 | 10.279 | 6.159 | -0.2062 | 0.0834 | -0.0204 |
| 22STYR | R3 | 88  | 13.206 | 10.079 | 6.106 | -0.1913 | 0.0732 | -0.0309 |
| 23STYR | B  | 89  | 13.752 | 9.718  | 6.245 | -0.1993 | 0.1008 | 0.0574  |
| 23STYR | R1 | 90  | 13.894 | 9.939  | 6.233 | -0.1976 | 0.1125 | 0.0675  |
| 23STYR | R2 | 91  | 14.022 | 10.106 | 6.403 | -0.2235 | 0.1247 | 0.0752  |
| 23STYR | R3 | 92  | 14.136 | 10.039 | 6.167 | -0.2003 | 0.1307 | 0.0847  |
| 24STYR | B  | 93  | 13.953 | 9.632  | 6.325 | -0.1939 | 0.1145 | 0.0941  |
| 24STYR | R1 | 94  | 13.787 | 9.478  | 6.173 | -0.1492 | 0.0985 | 0.0686  |
| 24STYR | R2 | 95  | 13.635 | 9.255  | 6.174 | -0.1384 | 0.0911 | 0.0644  |
| 24STYR | R3 | 96  | 13.774 | 9.322  | 5.952 | -0.1134 | 0.0827 | 0.0775  |
| 25STYR | B  | 97  | 14.055 | 9.458  | 6.448 | -0.1936 | 0.1382 | 0.0967  |
| 25STYR | R1 | 98  | 14.204 | 9.670  | 6.395 | -0.1992 | 0.1213 | 0.1106  |
| 25STYR | R2 | 99  | 14.435 | 9.751  | 6.280 | -0.1922 | 0.1388 | 0.1369  |
| 25STYR | R3 | 100 | 14.358 | 9.856  | 6.516 | -0.2296 | 0.1366 | 0.1257  |
| 26STYR | B  | 101 | 14.033 | 9.240  | 6.512 | -0.1689 | 0.1394 | 0.1285  |
| 26STYR | R1 | 102 | 14.181 | 9.306  | 6.305 | -0.1748 | 0.1005 | 0.1199  |
| 26STYR | R2 | 103 | 14.433 | 9.299  | 6.207 | -0.1642 | 0.1404 | 0.1437  |
| 26STYR | R3 | 104 | 14.224 | 9.326  | 6.039 | -0.1532 | 0.1009 | 0.1233  |
| 27STYR | B  | 105 | 13.911 | 9.047  | 6.561 | -0.1890 | 0.1301 | 0.1071  |
| 27STYR | R1 | 106 | 14.103 | 9.123  | 6.741 | -0.2236 | 0.1512 | 0.1259  |
| 27STYR | R2 | 107 | 14.313 | 9.036  | 6.886 | -0.2333 | 0.1724 | 0.1530  |
| 27STYR | R3 | 108 | 14.138 | 9.209  | 6.995 | -0.2621 | 0.1586 | 0.1287  |
| 28STYR | B  | 109 | 13.819 | 8.853  | 6.457 | -0.1628 | 0.1060 | 0.1048  |
| 28STYR | R1 | 110 | 13.643 | 9.015  | 6.564 | -0.1828 | 0.0950 | 0.0720  |
| 28STYR | R2 | 111 | 13.436 | 8.998  | 6.737 | -0.2119 | 0.0951 | 0.0375  |
| 28STYR | R3 | 112 | 13.406 | 9.130  | 6.504 | -0.1751 | 0.0887 | 0.0291  |
| 29STYR | B  | 113 | 13.880 | 8.649  | 6.376 | -0.1375 | 0.1126 | 0.1241  |
| 29STYR | R1 | 114 | 14.070 | 8.779  | 6.484 | -0.1702 | 0.1432 | 0.1515  |
| 29STYR | R2 | 115 | 14.254 | 8.698  | 6.664 | -0.1830 | 0.1294 | 0.1585  |
| 29STYR | R3 | 116 | 14.325 | 8.864  | 6.464 | -0.1669 | 0.1378 | 0.1713  |
| 30STYR | B  | 117 | 14.012 | 8.473  | 6.307 | -0.1222 | 0.1292 | 0.1476  |
| 30STYR | R1 | 118 | 13.899 | 8.438  | 6.539 | -0.1432 | 0.1143 | 0.1295  |
| 30STYR | R2 | 119 | 13.741 | 8.273  | 6.683 | -0.1522 | 0.1198 | 0.1260  |
| 30STYR | R3 | 120 | 13.976 | 8.359  | 6.786 | -0.1639 | 0.1327 | 0.1419  |
| 31STYR | B  | 121 | 14.067 | 8.249  | 6.342 | -0.1119 | 0.1136 | 0.1593  |
| 31STYR | R1 | 122 | 14.264 | 8.417  | 6.299 | -0.1243 | 0.1463 | 0.1782  |
| 31STYR | R2 | 123 | 14.466 | 8.490  | 6.136 | -0.1046 | 0.1495 | 0.2040  |
| 31STYR | R3 | 124 | 14.506 | 8.477  | 6.403 | -0.1355 | 0.1399 | 0.2082  |
| 32STYR | B  | 125 | 14.246 | 8.091  | 6.337 | -0.0929 | 0.1566 | 0.2036  |
| 32STYR | R1 | 126 | 14.052 | 8.029  | 6.502 | -0.1246 | 0.1346 | 0.1664  |

|        |    |     |        |       |       |         |        |         |
|--------|----|-----|--------|-------|-------|---------|--------|---------|
| 32STYR | R2 | 127 | 13.858 | 7.853 | 6.566 | -0.1146 | 0.1210 | 0.1591  |
| 32STYR | R3 | 128 | 14.032 | 7.938 | 6.755 | -0.1450 | 0.1548 | 0.1720  |
| 33STYR | B  | 129 | 14.406 | 8.016 | 6.506 | -0.1074 | 0.1737 | 0.1895  |
| 33STYR | R1 | 130 | 14.362 | 7.863 | 6.278 | -0.0880 | 0.1403 | 0.2189  |
| 33STYR | R2 | 131 | 14.301 | 7.607 | 6.221 | -0.0735 | 0.1361 | 0.2227  |
| 33STYR | R3 | 132 | 14.484 | 7.738 | 6.073 | -0.0509 | 0.1313 | 0.2461  |
| 34STYR | B  | 133 | 14.466 | 8.137 | 6.716 | -0.1267 | 0.1948 | 0.1923  |
| 34STYR | R1 | 134 | 14.623 | 7.928 | 6.632 | -0.1260 | 0.1624 | 0.2318  |
| 34STYR | R2 | 135 | 14.727 | 7.697 | 6.725 | -0.1174 | 0.1807 | 0.2682  |
| 34STYR | R3 | 136 | 14.875 | 7.857 | 6.566 | -0.1154 | 0.1721 | 0.2615  |
| 35STYR | B  | 137 | 14.454 | 8.342 | 6.831 | -0.1704 | 0.1607 | 0.1937  |
| 35STYR | R1 | 138 | 14.372 | 8.147 | 6.975 | -0.1847 | 0.1801 | 0.1965  |
| 35STYR | R2 | 139 | 14.160 | 8.090 | 7.132 | -0.2021 | 0.1683 | 0.1687  |
| 35STYR | R3 | 140 | 14.408 | 8.020 | 7.211 | -0.2085 | 0.1819 | 0.2011  |
| 36STYR | B  | 141 | 14.376 | 8.471 | 7.024 | -0.1981 | 0.1945 | 0.1705  |
| 36STYR | R1 | 142 | 14.611 | 8.537 | 6.903 | -0.1847 | 0.1785 | 0.2235  |
| 36STYR | R2 | 143 | 14.871 | 8.586 | 6.959 | -0.1899 | 0.1863 | 0.2409  |
| 36STYR | R3 | 144 | 14.724 | 8.770 | 6.828 | -0.1859 | 0.1805 | 0.2280  |
| 37STYR | B  | 145 | 14.186 | 8.610 | 7.098 | -0.2065 | 0.1891 | 0.1620  |
| 37STYR | R1 | 146 | 14.315 | 8.488 | 7.300 | -0.2225 | 0.1802 | 0.1684  |
| 37STYR | R2 | 147 | 14.302 | 8.309 | 7.502 | -0.2397 | 0.1913 | 0.1772  |
| 37STYR | R3 | 148 | 14.410 | 8.553 | 7.545 | -0.2867 | 0.2106 | 0.1855  |
| 38STYR | B  | 149 | 14.023 | 8.591 | 7.277 | -0.2460 | 0.1637 | 0.1414  |
| 38STYR | R1 | 150 | 13.941 | 8.716 | 7.056 | -0.2063 | 0.1534 | 0.1089  |
| 38STYR | R2 | 151 | 13.751 | 8.704 | 6.865 | -0.2027 | 0.1254 | 0.1071  |
| 38STYR | R3 | 152 | 13.805 | 8.939 | 6.987 | -0.2324 | 0.1352 | 0.1015  |
| 39STYR | B  | 153 | 13.896 | 8.622 | 7.480 | -0.2509 | 0.1721 | 0.1209  |
| 39STYR | R1 | 154 | 13.889 | 8.381 | 7.371 | -0.2294 | 0.1668 | 0.1349  |
| 39STYR | R2 | 155 | 13.890 | 8.128 | 7.466 | -0.2308 | 0.1663 | 0.1335  |
| 39STYR | R3 | 156 | 13.755 | 8.187 | 7.240 | -0.2109 | 0.1635 | 0.1209  |
| 40STYR | B  | 157 | 13.937 | 8.730 | 7.686 | -0.2942 | 0.1766 | 0.1178  |
| 40STYR | R1 | 158 | 14.044 | 8.837 | 7.480 | -0.2754 | 0.1741 | 0.1369  |
| 40STYR | R2 | 159 | 14.053 | 9.083 | 7.369 | -0.2793 | 0.1644 | 0.1148  |
| 40STYR | R3 | 160 | 14.280 | 8.938 | 7.396 | -0.2737 | 0.1790 | 0.1476  |
| 41STYR | B  | 161 | 13.891 | 8.859 | 7.880 | -0.3289 | 0.1837 | 0.0910  |
| 41STYR | R1 | 162 | 14.145 | 8.810 | 7.839 | -0.3110 | 0.2096 | 0.1489  |
| 41STYR | R2 | 163 | 14.389 | 8.923 | 7.811 | -0.3102 | 0.2116 | 0.1638  |
| 41STYR | R3 | 164 | 14.352 | 8.725 | 7.990 | -0.3228 | 0.2210 | 0.1717  |
| 42STYR | B  | 165 | 13.974 | 9.072 | 7.947 | -0.3406 | 0.1651 | 0.1042  |
| 42STYR | R1 | 166 | 13.847 | 8.950 | 8.136 | -0.3784 | 0.2098 | 0.1047  |
| 42STYR | R2 | 167 | 13.648 | 8.982 | 8.316 | -0.3966 | 0.1765 | 0.0908  |
| 42STYR | R3 | 168 | 13.889 | 8.890 | 8.396 | -0.3849 | 0.2222 | 0.1086  |
| 43STYR | B  | 169 | 13.914 | 9.280 | 8.053 | -0.3766 | 0.1821 | 0.1071  |
| 43STYR | R1 | 170 | 14.127 | 9.276 | 7.883 | -0.3576 | 0.1958 | 0.1256  |
| 43STYR | R2 | 171 | 14.216 | 9.365 | 7.644 | -0.3385 | 0.1917 | 0.1312  |
| 43STYR | R3 | 172 | 14.387 | 9.340 | 7.851 | -0.3579 | 0.2093 | 0.1494  |
| 44STYR | B  | 173 | 13.666 | 9.360 | 8.079 | -0.3955 | 0.1586 | 0.0388  |
| 44STYR | R1 | 174 | 13.850 | 9.379 | 8.294 | -0.4022 | 0.2091 | 0.0747  |
| 44STYR | R2 | 175 | 13.942 | 9.551 | 8.482 | -0.4428 | 0.2332 | 0.0726  |
| 44STYR | R3 | 176 | 13.853 | 9.306 | 8.554 | -0.4060 | 0.2214 | 0.0782  |
| 45STYR | B  | 177 | 13.494 | 9.225 | 7.964 | -0.3670 | 0.1772 | 0.0450  |
| 45STYR | R1 | 178 | 13.394 | 9.403 | 8.118 | -0.3746 | 0.1638 | 0.0391  |
| 45STYR | R2 | 179 | 13.207 | 9.397 | 8.313 | -0.4211 | 0.1639 | -0.0050 |
| 45STYR | R3 | 180 | 13.196 | 9.587 | 8.121 | -0.3842 | 0.1546 | -0.0165 |
| 46STYR | B  | 181 | 13.495 | 9.033 | 7.837 | -0.3347 | 0.1727 | 0.0663  |
| 46STYR | R1 | 182 | 13.301 | 9.045 | 8.001 | -0.3543 | 0.1552 | 0.0279  |
| 46STYR | R2 | 183 | 13.031 | 9.039 | 8.020 | -0.3560 | 0.1364 | -0.0022 |
| 46STYR | R3 | 184 | 13.182 | 8.902 | 8.197 | -0.3659 | 0.1575 | 0.0225  |
| 47STYR | B  | 185 | 13.410 | 8.821 | 7.796 | -0.2966 | 0.1507 | 0.0613  |
| 47STYR | R1 | 186 | 13.488 | 8.963 | 7.588 | -0.2929 | 0.1346 | 0.0531  |
| 47STYR | R2 | 187 | 13.389 | 9.060 | 7.357 | -0.2829 | 0.1363 | 0.0496  |
| 47STYR | R3 | 188 | 13.644 | 8.971 | 7.368 | -0.2826 | 0.1385 | 0.0605  |
| 48STYR | B  | 189 | 13.487 | 8.611 | 7.701 | -0.2838 | 0.1488 | 0.0703  |
| 48STYR | R1 | 190 | 13.479 | 8.631 | 7.972 | -0.3286 | 0.1485 | 0.0618  |
| 48STYR | R2 | 191 | 13.620 | 8.585 | 8.198 | -0.3552 | 0.2133 | 0.0919  |
| 48STYR | R3 | 192 | 13.366 | 8.495 | 8.177 | -0.3361 | 0.1642 | 0.0681  |
| 49STYR | B  | 193 | 13.624 | 8.433 | 7.776 | -0.2962 | 0.1429 | 0.1026  |
| 49STYR | R1 | 194 | 13.430 | 8.357 | 7.624 | -0.2640 | 0.1312 | 0.0925  |
| 49STYR | R2 | 195 | 13.380 | 8.199 | 7.411 | -0.2304 | 0.1224 | 0.0913  |
| 49STYR | R3 | 196 | 13.235 | 8.171 | 7.637 | -0.2637 | 0.1295 | 0.0707  |
| 50STYR | B  | 197 | 13.638 | 8.209 | 7.855 | -0.2857 | 0.1811 | 0.1331  |
| 50STYR | R1 | 198 | 13.851 | 8.359 | 7.900 | -0.3037 | 0.1794 | 0.1229  |
| 50STYR | R2 | 199 | 14.120 | 8.360 | 7.869 | -0.2979 | 0.1960 | 0.1731  |

|        |    |     |        |        |       |         |         |         |
|--------|----|-----|--------|--------|-------|---------|---------|---------|
| 50STYR | R3 | 200 | 14.010 | 8.455  | 8.096 | -0.3470 | 0.1993  | 0.1482  |
| 1STYR  | B  | 201 | 11.951 | 9.076  | 5.659 | -0.0810 | -0.0266 | -0.1316 |
| 1STYR  | R1 | 202 | 11.715 | 9.123  | 5.545 | -0.0642 | -0.0459 | -0.1588 |
| 1STYR  | R2 | 203 | 11.497 | 9.280  | 5.573 | -0.0770 | -0.0566 | -0.1979 |
| 1STYR  | R3 | 204 | 11.468 | 9.018  | 5.516 | -0.0547 | -0.0650 | -0.1704 |
| 2STYR  | B  | 205 | 12.042 | 9.266  | 5.769 | -0.0920 | -0.0143 | -0.1291 |
| 2STYR  | R1 | 206 | 11.976 | 9.059  | 5.929 | -0.1139 | -0.0123 | -0.1246 |
| 2STYR  | R2 | 207 | 12.068 | 8.888  | 6.115 | -0.1220 | 0.0017  | -0.1077 |
| 2STYR  | R3 | 208 | 11.832 | 9.012  | 6.152 | -0.1261 | 0.0005  | -0.1298 |
| 3STYR  | B  | 209 | 12.197 | 9.460  | 5.755 | -0.1158 | -0.0152 | -0.1119 |
| 3STYR  | R1 | 210 | 11.939 | 9.505  | 5.834 | -0.1388 | -0.0397 | -0.1435 |
| 3STYR  | R2 | 211 | 11.713 | 9.640  | 5.773 | -0.1322 | -0.0444 | -0.1785 |
| 3STYR  | R3 | 212 | 11.808 | 9.642  | 6.026 | -0.1670 | -0.0359 | -0.1655 |
| 4STYR  | B  | 213 | 12.268 | 9.607  | 5.936 | -0.1390 | 0.0123  | -0.1155 |
| 4STYR  | R1 | 214 | 12.475 | 9.522  | 5.808 | -0.1254 | -0.0116 | -0.1040 |
| 4STYR  | R2 | 215 | 12.700 | 9.635  | 5.710 | -0.1216 | 0.0137  | -0.0663 |
| 4STYR  | R3 | 216 | 12.713 | 9.399  | 5.841 | -0.1140 | 0.0261  | -0.0445 |
| 5STYR  | B  | 217 | 12.436 | 9.648  | 6.092 | -0.1811 | 0.0137  | -0.1062 |
| 5STYR  | R1 | 218 | 12.232 | 9.493  | 6.168 | -0.1568 | 0.0072  | -0.1130 |
| 5STYR  | R2 | 219 | 12.034 | 9.477  | 6.351 | -0.1827 | 0.0008  | -0.1414 |
| 5STYR  | R3 | 220 | 12.177 | 9.256  | 6.286 | -0.1678 | 0.0049  | -0.1227 |
| 6STYR  | B  | 221 | 12.503 | 9.725  | 6.302 | -0.1910 | 0.0335  | -0.0903 |
| 6STYR  | R1 | 222 | 12.348 | 9.884  | 6.156 | -0.1798 | 0.0147  | -0.1030 |
| 6STYR  | R2 | 223 | 12.109 | 10.009 | 6.152 | -0.1898 | -0.0057 | -0.1610 |
| 6STYR  | R3 | 224 | 12.334 | 10.144 | 6.087 | -0.1887 | 0.0065  | -0.1324 |
| 7STYR  | B  | 225 | 12.660 | 9.742  | 6.482 | -0.2405 | 0.0485  | -0.0797 |
| 7STYR  | R1 | 226 | 12.426 | 9.633  | 6.536 | -0.2081 | 0.0509  | -0.0910 |
| 7STYR  | R2 | 227 | 12.340 | 9.409  | 6.661 | -0.2051 | 0.0429  | -0.1032 |
| 7STYR  | R3 | 228 | 12.220 | 9.646  | 6.710 | -0.2278 | 0.0335  | -0.1129 |
| 8STYR  | B  | 229 | 12.862 | 9.838  | 6.541 | -0.2449 | 0.0464  | -0.0592 |
| 8STYR  | R1 | 230 | 12.804 | 9.847  | 6.284 | -0.2005 | 0.0461  | -0.0650 |
| 8STYR  | R2 | 231 | 12.771 | 10.021 | 6.080 | -0.1925 | 0.0358  | -0.0751 |
| 8STYR  | R3 | 232 | 12.903 | 9.789  | 6.040 | -0.1615 | 0.0490  | -0.0499 |
| 9STYR  | B  | 233 | 12.964 | 10.039 | 6.597 | -0.2536 | 0.0600  | -0.0494 |
| 9STYR  | R1 | 234 | 12.695 | 10.023 | 6.614 | -0.2491 | 0.0573  | -0.0707 |
| 9STYR  | R2 | 235 | 12.479 | 10.151 | 6.515 | -0.2472 | 0.0315  | -0.1087 |
| 9STYR  | R3 | 236 | 12.480 | 10.068 | 6.771 | -0.2805 | 0.0355  | -0.1072 |
| 10STYR | B  | 237 | 13.155 | 10.167 | 6.664 | -0.2592 | 0.0922  | -0.0532 |
| 10STYR | R1 | 238 | 12.974 | 10.270 | 6.488 | -0.2549 | 0.0629  | -0.0680 |
| 10STYR | R2 | 239 | 12.801 | 10.476 | 6.464 | -0.2625 | 0.0525  | -0.1022 |
| 10STYR | R3 | 240 | 12.943 | 10.393 | 6.249 | -0.2190 | 0.0574  | -0.0756 |
| 11STYR | B  | 241 | 13.295 | 10.210 | 6.861 | -0.2994 | 0.0686  | -0.0047 |
| 11STYR | R1 | 242 | 13.424 | 10.158 | 6.638 | -0.2548 | 0.1092  | -0.0208 |
| 11STYR | R2 | 243 | 13.628 | 10.001 | 6.556 | -0.2277 | 0.1091  | 0.0455  |
| 11STYR | R3 | 244 | 13.631 | 10.266 | 6.504 | -0.2354 | 0.1008  | 0.0021  |
| 12STYR | B  | 245 | 13.316 | 10.203 | 7.096 | -0.3226 | 0.1314  | -0.0134 |
| 12STYR | R1 | 246 | 13.067 | 10.220 | 6.994 | -0.3082 | 0.1030  | -0.0321 |
| 12STYR | R2 | 247 | 12.840 | 10.365 | 6.967 | -0.3152 | 0.0848  | -0.0703 |
| 12STYR | R3 | 248 | 12.827 | 10.103 | 7.031 | -0.3047 | 0.0861  | -0.0629 |
| 13STYR | B  | 249 | 13.277 | 10.049 | 7.275 | -0.3188 | 0.1308  | -0.0334 |
| 13STYR | R1 | 250 | 13.459 | 10.241 | 7.322 | -0.3368 | 0.1344  | -0.0004 |
| 13STYR | R2 | 251 | 13.519 | 10.418 | 7.517 | -0.3703 | 0.1569  | -0.0105 |
| 13STYR | R3 | 252 | 13.716 | 10.277 | 7.398 | -0.3501 | 0.1398  | 0.0425  |
| 14STYR | B  | 253 | 13.374 | 9.850  | 7.380 | -0.3175 | 0.1537  | 0.0026  |
| 14STYR | R1 | 254 | 13.132 | 9.933  | 7.466 | -0.3323 | 0.1085  | -0.0186 |
| 14STYR | R2 | 255 | 12.876 | 9.861  | 7.514 | -0.3373 | 0.0978  | -0.0607 |
| 14STYR | R3 | 256 | 13.022 | 9.979  | 7.708 | -0.3823 | 0.1275  | -0.0447 |
| 15STYR | B  | 257 | 13.635 | 9.832  | 7.381 | -0.3339 | 0.1623  | 0.0346  |
| 15STYR | R1 | 258 | 13.497 | 9.888  | 7.613 | -0.3687 | 0.1484  | 0.0019  |
| 15STYR | R2 | 259 | 13.472 | 10.073 | 7.808 | -0.4219 | 0.1570  | -0.0128 |
| 15STYR | R3 | 260 | 13.451 | 9.810  | 7.867 | -0.3567 | 0.1559  | 0.0064  |
| 16STYR | B  | 261 | 13.734 | 9.894  | 7.163 | -0.3221 | 0.1423  | 0.0496  |
| 16STYR | R1 | 262 | 13.817 | 9.665  | 7.261 | -0.3047 | 0.1450  | 0.0603  |
| 16STYR | R2 | 263 | 13.834 | 9.400  | 7.212 | -0.2828 | 0.1446  | 0.0697  |
| 16STYR | R3 | 264 | 14.051 | 9.536  | 7.296 | -0.3019 | 0.1594  | 0.0954  |
| 17STYR | B  | 265 | 13.617 | 9.844  | 6.960 | -0.2747 | 0.1403  | 0.0264  |
| 17STYR | R1 | 266 | 13.757 | 10.077 | 6.974 | -0.2951 | 0.1301  | 0.0430  |
| 17STYR | R2 | 267 | 13.721 | 10.343 | 6.941 | -0.3266 | 0.1258  | 0.0421  |
| 17STYR | R3 | 268 | 13.939 | 10.221 | 6.836 | -0.2981 | 0.1560  | 0.0661  |
| 18STYR | B  | 269 | 13.412 | 9.763  | 6.891 | -0.2722 | 0.1003  | 0.0192  |
| 18STYR | R1 | 270 | 13.606 | 9.608  | 6.827 | -0.2746 | 0.0984  | 0.0458  |
| 18STYR | R2 | 271 | 13.691 | 9.352  | 6.831 | -0.2297 | 0.1134  | 0.0663  |
| 18STYR | R3 | 272 | 13.646 | 9.475  | 6.595 | -0.2082 | 0.1008  | 0.0555  |

|        |    |     |        |       |       |         |        |         |
|--------|----|-----|--------|-------|-------|---------|--------|---------|
| 19STYR | B  | 273 | 13.177 | 9.781 | 6.912 | -0.2603 | 0.0891 | -0.0149 |
| 19STYR | R1 | 274 | 13.281 | 9.721 | 6.669 | -0.2265 | 0.0892 | -0.0060 |
| 19STYR | R2 | 275 | 13.292 | 9.790 | 6.409 | -0.2176 | 0.0779 | -0.0087 |
| 19STYR | R3 | 276 | 13.252 | 9.532 | 6.479 | -0.2065 | 0.0788 | 0.0012  |
| 20STYR | B  | 277 | 13.031 | 9.719 | 7.090 | -0.2885 | 0.0984 | -0.0373 |
| 20STYR | R1 | 278 | 13.232 | 9.561 | 7.054 | -0.2762 | 0.0965 | 0.0018  |
| 20STYR | R2 | 279 | 13.424 | 9.442 | 7.201 | -0.2742 | 0.1270 | 0.0240  |
| 20STYR | R3 | 280 | 13.315 | 9.312 | 6.992 | -0.2559 | 0.0951 | 0.0341  |
| 21STYR | B  | 281 | 12.977 | 9.516 | 7.210 | -0.2961 | 0.0929 | -0.0127 |
| 21STYR | R1 | 282 | 12.783 | 9.678 | 7.109 | -0.2860 | 0.1007 | -0.0496 |
| 21STYR | R2 | 283 | 12.547 | 9.791 | 7.175 | -0.3046 | 0.0709 | -0.0646 |
| 21STYR | R3 | 284 | 12.580 | 9.681 | 6.931 | -0.2800 | 0.0622 | -0.0574 |
| 22STYR | B  | 285 | 12.801 | 9.442 | 7.366 | -0.3097 | 0.0990 | -0.0411 |
| 22STYR | R1 | 286 | 13.046 | 9.449 | 7.466 | -0.3259 | 0.1109 | -0.0108 |
| 22STYR | R2 | 287 | 13.180 | 9.287 | 7.635 | -0.3325 | 0.1254 | 0.0085  |
| 22STYR | R3 | 288 | 13.175 | 9.553 | 7.680 | -0.3438 | 0.1280 | -0.0082 |
| 23STYR | B  | 289 | 12.751 | 9.216 | 7.447 | -0.2953 | 0.0974 | -0.0472 |
| 23STYR | R1 | 290 | 12.641 | 9.296 | 7.212 | -0.2758 | 0.0939 | -0.0613 |
| 23STYR | R2 | 291 | 12.624 | 9.234 | 6.950 | -0.2433 | 0.0725 | -0.0584 |
| 23STYR | R3 | 292 | 12.404 | 9.318 | 7.084 | -0.2666 | 0.0545 | -0.0851 |
| 24STYR | B  | 293 | 12.799 | 9.027 | 7.591 | -0.3107 | 0.1042 | -0.0211 |
| 24STYR | R1 | 294 | 12.740 | 9.264 | 7.709 | -0.3224 | 0.0952 | -0.0289 |
| 24STYR | R2 | 295 | 12.836 | 9.428 | 7.901 | -0.3654 | 0.1352 | -0.0414 |
| 24STYR | R3 | 296 | 12.573 | 9.369 | 7.894 | -0.3585 | 0.1077 | -0.0685 |
| 25STYR | B  | 297 | 12.991 | 8.878 | 7.605 | -0.3039 | 0.1192 | 0.0004  |
| 25STYR | R1 | 298 | 12.920 | 8.962 | 7.357 | -0.2871 | 0.0964 | 0.0002  |
| 25STYR | R2 | 299 | 12.845 | 8.864 | 7.117 | -0.2313 | 0.0748 | -0.0086 |
| 25STYR | R3 | 300 | 13.027 | 9.063 | 7.131 | -0.2617 | 0.1012 | 0.0142  |
| 26STYR | B  | 301 | 13.110 | 8.726 | 7.475 | -0.2589 | 0.1252 | 0.0166  |
| 26STYR | R1 | 302 | 12.998 | 8.616 | 7.674 | -0.3011 | 0.1287 | 0.0030  |
| 26STYR | R2 | 303 | 12.837 | 8.409 | 7.738 | -0.3018 | 0.1318 | 0.0111  |
| 26STYR | R3 | 304 | 13.052 | 8.464 | 7.891 | -0.2986 | 0.1337 | 0.0058  |
| 27STYR | B  | 305 | 13.069 | 8.515 | 7.371 | -0.2501 | 0.1090 | 0.0264  |
| 27STYR | R1 | 306 | 13.275 | 8.640 | 7.289 | -0.2361 | 0.1077 | 0.0643  |
| 27STYR | R2 | 307 | 13.532 | 8.584 | 7.225 | -0.2319 | 0.1168 | 0.0730  |
| 27STYR | R3 | 308 | 13.388 | 8.752 | 7.070 | -0.2283 | 0.1225 | 0.0758  |
| 28STYR | B  | 309 | 13.026 | 8.461 | 7.144 | -0.2117 | 0.0892 | 0.0342  |
| 28STYR | R1 | 310 | 12.972 | 8.267 | 7.310 | -0.2316 | 0.1143 | 0.0336  |
| 28STYR | R2 | 311 | 13.007 | 7.999 | 7.312 | -0.1999 | 0.1185 | 0.0557  |
| 28STYR | R3 | 312 | 12.768 | 8.104 | 7.383 | -0.2215 | 0.0949 | 0.0185  |
| 29STYR | B  | 313 | 12.890 | 8.348 | 6.981 | -0.1900 | 0.0931 | 0.0093  |
| 29STYR | R1 | 314 | 13.168 | 8.375 | 6.953 | -0.1930 | 0.1001 | 0.0400  |
| 29STYR | R2 | 315 | 13.408 | 8.253 | 6.956 | -0.1839 | 0.1190 | 0.0831  |
| 29STYR | R3 | 316 | 13.360 | 8.449 | 6.778 | -0.1738 | 0.1022 | 0.0618  |
| 30STYR | B  | 317 | 12.694 | 8.439 | 6.869 | -0.1983 | 0.0602 | -0.0047 |
| 30STYR | R1 | 318 | 12.667 | 8.454 | 7.122 | -0.2203 | 0.0729 | -0.0123 |
| 30STYR | R2 | 319 | 12.460 | 8.391 | 7.284 | -0.2323 | 0.0622 | -0.0317 |
| 30STYR | R3 | 320 | 12.632 | 8.587 | 7.355 | -0.2553 | 0.0786 | -0.0206 |
| 31STYR | B  | 321 | 12.556 | 8.625 | 6.850 | -0.1933 | 0.0618 | -0.0330 |
| 31STYR | R1 | 322 | 12.449 | 8.391 | 6.794 | -0.1880 | 0.0519 | -0.0353 |
| 31STYR | R2 | 323 | 12.311 | 8.247 | 6.612 | -0.1494 | 0.0226 | -0.0419 |
| 31STYR | R3 | 324 | 12.240 | 8.240 | 6.872 | -0.1788 | 0.0315 | -0.0496 |
| 32STYR | B  | 325 | 12.572 | 8.844 | 6.763 | -0.1799 | 0.0501 | -0.0607 |
| 32STYR | R1 | 326 | 12.436 | 8.822 | 6.989 | -0.2141 | 0.0704 | -0.0627 |
| 32STYR | R2 | 327 | 12.423 | 8.923 | 7.239 | -0.2643 | 0.0693 | -0.0648 |
| 32STYR | R3 | 328 | 12.198 | 8.893 | 7.093 | -0.2389 | 0.0404 | -0.0985 |
| 33STYR | B  | 329 | 12.646 | 8.974 | 6.591 | -0.1730 | 0.0353 | -0.0406 |
| 33STYR | R1 | 330 | 12.821 | 8.807 | 6.676 | -0.1859 | 0.0741 | -0.0191 |
| 33STYR | R2 | 331 | 12.980 | 8.609 | 6.584 | -0.1827 | 0.0625 | 0.0118  |
| 33STYR | R3 | 332 | 13.074 | 8.784 | 6.767 | -0.1957 | 0.0732 | 0.0083  |
| 34STYR | B  | 333 | 12.584 | 9.107 | 6.411 | -0.1566 | 0.0416 | -0.0579 |
| 34STYR | R1 | 334 | 12.392 | 8.967 | 6.547 | -0.1839 | 0.0185 | -0.0678 |
| 34STYR | R2 | 335 | 12.154 | 9.012 | 6.666 | -0.2050 | 0.0145 | -0.1078 |
| 34STYR | R3 | 336 | 12.191 | 8.788 | 6.520 | -0.1730 | 0.0098 | -0.0927 |
| 35STYR | B  | 337 | 12.654 | 9.316 | 6.324 | -0.1612 | 0.0303 | -0.0693 |
| 35STYR | R1 | 338 | 12.581 | 9.127 | 6.154 | -0.1502 | 0.0232 | -0.0548 |
| 35STYR | R2 | 339 | 12.651 | 8.994 | 5.930 | -0.1076 | 0.0311 | -0.0463 |
| 35STYR | R3 | 340 | 12.406 | 9.106 | 5.949 | -0.1229 | 0.0030 | -0.0760 |
| 36STYR | B  | 341 | 12.880 | 9.395 | 6.250 | -0.1708 | 0.0490 | -0.0390 |
| 36STYR | R1 | 342 | 12.866 | 9.341 | 6.511 | -0.1966 | 0.0600 | -0.0352 |
| 36STYR | R2 | 343 | 13.008 | 9.209 | 6.699 | -0.2135 | 0.0761 | -0.0111 |
| 36STYR | R3 | 344 | 12.914 | 9.457 | 6.750 | -0.2420 | 0.0695 | -0.0307 |
| 37STYR | B  | 345 | 13.052 | 9.209 | 6.251 | -0.1459 | 0.0629 | 0.0001  |

|        |    |     |        |        |       |         |         |         |
|--------|----|-----|--------|--------|-------|---------|---------|---------|
| 37STYR | R1 | 346 | 13.104 | 9.414  | 6.089 | -0.1353 | 0.0494  | -0.0011 |
| 37STYR | R2 | 347 | 13.160 | 9.461  | 5.829 | -0.1271 | 0.0554  | 0.0017  |
| 37STYR | R3 | 348 | 13.312 | 9.572  | 6.022 | -0.1512 | 0.0750  | 0.0095  |
| 38STYR | B  | 349 | 13.012 | 8.976  | 6.291 | -0.1779 | 0.0764  | -0.0037 |
| 38STYR | R1 | 350 | 13.086 | 9.058  | 6.050 | -0.1291 | 0.0541  | 0.0060  |
| 38STYR | R2 | 351 | 13.032 | 9.048  | 5.786 | -0.0928 | 0.0347  | -0.0007 |
| 38STYR | R3 | 352 | 13.288 | 9.036  | 5.873 | -0.1038 | 0.0533  | 0.0346  |
| 39STYR | B  | 353 | 12.964 | 8.785  | 6.170 | -0.1098 | 0.0626  | 0.0121  |
| 39STYR | R1 | 354 | 13.202 | 8.803  | 6.279 | -0.1451 | 0.0593  | 0.0336  |
| 39STYR | R2 | 355 | 13.461 | 8.798  | 6.201 | -0.1392 | 0.0876  | 0.0513  |
| 39STYR | R3 | 356 | 13.386 | 8.672  | 6.427 | -0.1386 | 0.0902  | 0.0529  |
| 40STYR | B  | 357 | 12.965 | 8.562  | 6.115 | -0.1118 | 0.0321  | 0.0181  |
| 40STYR | R1 | 358 | 12.737 | 8.663  | 6.210 | -0.1197 | 0.0383  | -0.0164 |
| 40STYR | R2 | 359 | 12.474 | 8.697  | 6.163 | -0.1177 | 0.0204  | -0.0408 |
| 40STYR | R3 | 360 | 12.556 | 8.591  | 6.397 | -0.1314 | 0.0402  | -0.0271 |
| 41STYR | B  | 361 | 13.045 | 8.347  | 6.046 | -0.0880 | 0.0621  | 0.0446  |
| 41STYR | R1 | 362 | 13.143 | 8.557  | 5.911 | -0.0615 | 0.0533  | 0.0424  |
| 41STYR | R2 | 363 | 13.178 | 8.670  | 5.669 | -0.0633 | 0.0322  | 0.0321  |
| 41STYR | R3 | 364 | 13.392 | 8.611  | 5.822 | -0.0630 | 0.0625  | 0.0436  |
| 42STYR | B  | 365 | 13.150 | 8.181  | 6.197 | -0.0921 | 0.0458  | 0.0636  |
| 42STYR | R1 | 366 | 13.048 | 8.084  | 5.967 | -0.0706 | 0.0498  | 0.0456  |
| 42STYR | R2 | 367 | 12.880 | 7.889  | 5.883 | -0.0320 | 0.0222  | 0.0322  |
| 42STYR | R3 | 368 | 13.117 | 7.926  | 5.759 | -0.0176 | 0.0452  | 0.0666  |
| 43STYR | B  | 369 | 13.157 | 8.215  | 6.453 | -0.1212 | 0.0807  | 0.0517  |
| 43STYR | R1 | 370 | 13.390 | 8.227  | 6.285 | -0.1010 | 0.0746  | 0.0699  |
| 43STYR | R2 | 371 | 13.640 | 8.128  | 6.260 | -0.0908 | 0.0860  | 0.1258  |
| 43STYR | R3 | 372 | 13.588 | 8.384  | 6.192 | -0.0881 | 0.0824  | 0.1103  |
| 44STYR | B  | 373 | 12.922 | 8.185  | 6.555 | -0.1409 | 0.0673  | 0.0127  |
| 44STYR | R1 | 374 | 13.100 | 8.022  | 6.653 | -0.1365 | 0.0694  | 0.0479  |
| 44STYR | R2 | 375 | 13.131 | 7.758  | 6.695 | -0.1413 | 0.0729  | 0.0728  |
| 44STYR | R3 | 376 | 13.144 | 7.930  | 6.902 | -0.1370 | 0.0923  | 0.0564  |
| 45STYR | B  | 377 | 12.713 | 8.188  | 6.437 | -0.1241 | 0.0535  | 0.0002  |
| 45STYR | R1 | 378 | 12.725 | 8.044  | 6.667 | -0.1402 | 0.0634  | 0.0130  |
| 45STYR | R2 | 379 | 12.615 | 7.997  | 6.909 | -0.1492 | 0.0613  | 0.0085  |
| 45STYR | R3 | 380 | 12.685 | 7.790  | 6.750 | -0.1264 | 0.0626  | 0.0170  |
| 46STYR | B  | 381 | 12.649 | 8.201  | 6.203 | -0.1121 | 0.0194  | 0.0056  |
| 46STYR | R1 | 382 | 12.754 | 7.969  | 6.301 | -0.0952 | 0.0581  | 0.0067  |
| 46STYR | R2 | 383 | 12.953 | 7.786  | 6.291 | -0.0831 | 0.0687  | 0.0511  |
| 46STYR | R3 | 384 | 12.696 | 7.705  | 6.307 | -0.0802 | 0.0553  | 0.0306  |
| 47STYR | B  | 385 | 12.588 | 8.277  | 5.979 | -0.0708 | 0.0324  | -0.0111 |
| 47STYR | R1 | 386 | 12.384 | 8.262  | 6.158 | -0.0919 | 0.0196  | -0.0630 |
| 47STYR | R2 | 387 | 12.140 | 8.149  | 6.182 | -0.0794 | -0.0025 | -0.0409 |
| 47STYR | R3 | 388 | 12.175 | 8.410  | 6.243 | -0.1096 | 0.0150  | -0.0982 |
| 48STYR | B  | 389 | 12.389 | 8.332  | 5.851 | -0.0696 | -0.0040 | -0.0458 |
| 48STYR | R1 | 390 | 12.527 | 8.121  | 5.769 | -0.0453 | 0.0150  | -0.0221 |
| 48STYR | R2 | 391 | 12.499 | 7.861  | 5.703 | -0.0346 | 0.0100  | -0.0074 |
| 48STYR | R3 | 392 | 12.636 | 8.028  | 5.541 | -0.0201 | 0.0011  | -0.0046 |
| 49STYR | B  | 393 | 12.245 | 8.521  | 5.808 | -0.0610 | -0.0203 | -0.0643 |
| 49STYR | R1 | 394 | 12.491 | 8.522  | 5.708 | -0.0529 | 0.0059  | -0.0366 |
| 49STYR | R2 | 395 | 12.617 | 8.544  | 5.471 | -0.0323 | 0.0085  | -0.0253 |
| 49STYR | R3 | 396 | 12.727 | 8.652  | 5.693 | -0.0563 | 0.0145  | -0.0163 |
| 50STYR | B  | 397 | 12.262 | 8.745  | 5.745 | -0.0844 | 0.0197  | -0.0876 |
| 50STYR | R1 | 398 | 12.014 | 8.639  | 5.749 | -0.0694 | -0.0236 | -0.0917 |
| 50STYR | R2 | 399 | 11.793 | 8.627  | 5.596 | -0.0476 | -0.0649 | -0.1199 |
| 50STYR | R3 | 400 | 11.771 | 8.672  | 5.861 | -0.0873 | -0.0286 | -0.1292 |
| 1STYR  | B  | 401 | 16.281 | 9.986  | 5.866 | -0.1660 | 0.2289  | 0.3381  |
| 1STYR  | R1 | 402 | 16.125 | 10.124 | 5.706 | -0.1625 | 0.2187  | 0.3087  |
| 1STYR  | R2 | 403 | 16.080 | 10.384 | 5.650 | -0.1681 | 0.2146  | 0.2942  |
| 1STYR  | R3 | 404 | 16.139 | 10.211 | 5.451 | -0.1311 | 0.2114  | 0.3080  |
| 2STYR  | B  | 405 | 16.055 | 9.926  | 5.862 | -0.1540 | 0.2082  | 0.2891  |
| 2STYR  | R1 | 406 | 16.172 | 9.914  | 6.095 | -0.1847 | 0.2318  | 0.3196  |
| 2STYR  | R2 | 407 | 16.134 | 9.995  | 6.349 | -0.2192 | 0.2545  | 0.3073  |
| 2STYR  | R3 | 408 | 16.237 | 9.750  | 6.300 | -0.1981 | 0.2558  | 0.3431  |
| 3STYR  | B  | 409 | 15.865 | 9.789  | 5.858 | -0.1398 | 0.1908  | 0.2980  |
| 3STYR  | R1 | 410 | 16.108 | 9.690  | 5.775 | -0.1231 | 0.2222  | 0.3259  |
| 3STYR  | R2 | 411 | 16.292 | 9.497  | 5.817 | -0.1146 | 0.2377  | 0.3587  |
| 3STYR  | R3 | 412 | 16.234 | 9.575  | 5.565 | -0.0850 | 0.2242  | 0.3477  |
| 4STYR  | B  | 413 | 15.628 | 9.735  | 5.861 | -0.1388 | 0.1808  | 0.2708  |
| 4STYR  | R1 | 414 | 15.741 | 9.883  | 5.656 | -0.1323 | 0.1884  | 0.2882  |
| 4STYR  | R2 | 415 | 15.720 | 10.112 | 5.515 | -0.1203 | 0.1798  | 0.2724  |
| 4STYR  | R3 | 416 | 15.802 | 9.886  | 5.393 | -0.0999 | 0.1748  | 0.2955  |
| 5STYR  | B  | 417 | 15.540 | 9.519  | 5.937 | -0.1366 | 0.2081  | 0.2744  |
| 5STYR  | R1 | 418 | 15.761 | 9.588  | 6.053 | -0.1596 | 0.2062  | 0.2903  |

|        |    |     |        |        |       |         |        |        |
|--------|----|-----|--------|--------|-------|---------|--------|--------|
| 5STYR  | R2 | 419 | 15.997 | 9.478  | 6.124 | -0.1624 | 0.2249 | 0.3289 |
| 5STYR  | R3 | 420 | 15.835 | 9.584  | 6.313 | -0.1916 | 0.2317 | 0.3000 |
| 6STYR  | B  | 421 | 15.419 | 9.322  | 5.897 | -0.1378 | 0.1729 | 0.2817 |
| 6STYR  | R1 | 422 | 15.419 | 9.418  | 6.152 | -0.1679 | 0.2008 | 0.2726 |
| 6STYR  | R2 | 423 | 15.461 | 9.331  | 6.404 | -0.2121 | 0.1909 | 0.2767 |
| 6STYR  | R3 | 424 | 15.257 | 9.500  | 6.352 | -0.2107 | 0.1831 | 0.2454 |
| 7STYR  | B  | 425 | 15.441 | 9.122  | 5.751 | -0.0966 | 0.1813 | 0.2924 |
| 7STYR  | R1 | 426 | 15.662 | 9.273  | 5.765 | -0.1065 | 0.1890 | 0.3093 |
| 7STYR  | R2 | 427 | 15.929 | 9.241  | 5.794 | -0.1068 | 0.2097 | 0.3342 |
| 7STYR  | R3 | 428 | 15.832 | 9.393  | 5.592 | -0.1001 | 0.1917 | 0.3175 |
| 8STYR  | B  | 429 | 15.606 | 8.950  | 5.725 | -0.0885 | 0.1739 | 0.3072 |
| 8STYR  | R1 | 430 | 15.493 | 9.025  | 5.503 | -0.0606 | 0.1894 | 0.2870 |
| 8STYR  | R2 | 431 | 15.578 | 9.104  | 5.260 | -0.0345 | 0.1549 | 0.2848 |
| 8STYR  | R3 | 432 | 15.389 | 8.913  | 5.281 | -0.0298 | 0.1511 | 0.2917 |
| 9STYR  | B  | 433 | 15.739 | 8.793  | 5.845 | -0.0764 | 0.2100 | 0.3259 |
| 9STYR  | R1 | 434 | 15.492 | 8.854  | 5.934 | -0.1014 | 0.1890 | 0.2793 |
| 9STYR  | R2 | 435 | 15.404 | 8.933  | 6.177 | -0.1256 | 0.1885 | 0.2708 |
| 9STYR  | R3 | 436 | 15.252 | 8.769  | 6.025 | -0.1037 | 0.1765 | 0.2618 |
| 10STYR | B  | 437 | 15.754 | 8.664  | 6.049 | -0.0867 | 0.2230 | 0.3465 |
| 10STYR | R1 | 438 | 15.829 | 8.920  | 6.070 | -0.1320 | 0.2331 | 0.3241 |
| 10STYR | R2 | 439 | 15.765 | 9.149  | 6.198 | -0.1461 | 0.2308 | 0.3211 |
| 10STYR | R3 | 440 | 16.021 | 9.063  | 6.194 | -0.1448 | 0.2339 | 0.3430 |
| 11STYR | B  | 441 | 15.882 | 8.640  | 6.252 | -0.1167 | 0.2473 | 0.3473 |
| 11STYR | R1 | 442 | 15.629 | 8.554  | 6.253 | -0.1220 | 0.1880 | 0.3187 |
| 11STYR | R2 | 443 | 15.488 | 8.328  | 6.299 | -0.1367 | 0.1997 | 0.3318 |
| 11STYR | R3 | 444 | 15.391 | 8.567  | 6.379 | -0.1334 | 0.2137 | 0.2947 |
| 12STYR | B  | 445 | 16.107 | 8.641  | 6.324 | -0.1265 | 0.2565 | 0.3576 |
| 12STYR | R1 | 446 | 16.070 | 8.553  | 6.083 | -0.0877 | 0.2245 | 0.3783 |
| 12STYR | R2 | 447 | 16.132 | 8.337  | 5.934 | -0.0564 | 0.2239 | 0.3920 |
| 12STYR | R3 | 448 | 16.156 | 8.584  | 5.829 | -0.0825 | 0.2212 | 0.3797 |
| 13STYR | B  | 449 | 16.315 | 8.735  | 6.365 | -0.1427 | 0.2650 | 0.3990 |
| 13STYR | R1 | 450 | 16.286 | 8.473  | 6.409 | -0.1307 | 0.2650 | 0.4185 |
| 13STYR | R2 | 451 | 16.390 | 8.234  | 6.337 | -0.1185 | 0.2673 | 0.4284 |
| 13STYR | R3 | 452 | 16.327 | 8.281  | 6.595 | -0.1344 | 0.2697 | 0.4241 |
| 14STYR | B  | 453 | 16.481 | 8.899  | 6.392 | -0.1667 | 0.2754 | 0.4217 |
| 14STYR | R1 | 454 | 16.403 | 8.855  | 6.144 | -0.1337 | 0.2249 | 0.4039 |
| 14STYR | R2 | 455 | 16.530 | 8.809  | 5.910 | -0.1019 | 0.2416 | 0.4178 |
| 14STYR | R3 | 456 | 16.321 | 8.980  | 5.919 | -0.1113 | 0.2312 | 0.3992 |
| 15STYR | B  | 457 | 16.601 | 9.033  | 6.547 | -0.1597 | 0.2604 | 0.4218 |
| 15STYR | R1 | 458 | 16.754 | 8.918  | 6.372 | -0.1427 | 0.2792 | 0.4434 |
| 15STYR | R2 | 459 | 16.977 | 8.767  | 6.345 | -0.1294 | 0.2943 | 0.4678 |
| 15STYR | R3 | 460 | 16.948 | 8.992  | 6.198 | -0.1391 | 0.2800 | 0.4477 |
| 16STYR | B  | 461 | 16.734 | 9.208  | 6.599 | -0.2128 | 0.2991 | 0.4239 |
| 16STYR | R1 | 462 | 16.583 | 9.217  | 6.373 | -0.1686 | 0.2770 | 0.4030 |
| 16STYR | R2 | 463 | 16.396 | 9.352  | 6.233 | -0.1696 | 0.2542 | 0.3823 |
| 16STYR | R3 | 464 | 16.608 | 9.244  | 6.105 | -0.1525 | 0.2631 | 0.4030 |
| 17STYR | B  | 465 | 16.922 | 9.305  | 6.715 | -0.2001 | 0.3085 | 0.4603 |
| 17STYR | R1 | 466 | 16.870 | 9.046  | 6.768 | -0.2103 | 0.3008 | 0.4540 |
| 17STYR | R2 | 467 | 16.993 | 8.805  | 6.770 | -0.2012 | 0.3056 | 0.4777 |
| 17STYR | R3 | 468 | 16.864 | 8.893  | 6.991 | -0.2389 | 0.3049 | 0.4562 |
| 18STYR | B  | 469 | 16.960 | 9.564  | 6.719 | -0.2125 | 0.3054 | 0.4188 |
| 18STYR | R1 | 470 | 17.006 | 9.417  | 6.483 | -0.2022 | 0.3228 | 0.4446 |
| 18STYR | R2 | 471 | 16.966 | 9.431  | 6.216 | -0.1586 | 0.2996 | 0.4367 |
| 18STYR | R3 | 472 | 17.208 | 9.360  | 6.313 | -0.1782 | 0.2950 | 0.4824 |
| 19STYR | B  | 473 | 16.807 | 9.679  | 6.544 | -0.2184 | 0.2798 | 0.4145 |
| 19STYR | R1 | 474 | 16.814 | 9.810  | 6.770 | -0.2494 | 0.3199 | 0.4062 |
| 19STYR | R2 | 475 | 16.856 | 10.065 | 6.848 | -0.2813 | 0.3260 | 0.4038 |
| 19STYR | R3 | 476 | 16.643 | 9.929  | 6.942 | -0.2823 | 0.3110 | 0.3797 |
| 20STYR | B  | 477 | 16.557 | 9.641  | 6.578 | -0.2395 | 0.2769 | 0.3862 |
| 20STYR | R1 | 478 | 16.653 | 9.733  | 6.332 | -0.2036 | 0.2872 | 0.3992 |
| 20STYR | R2 | 479 | 16.621 | 9.685  | 6.068 | -0.1753 | 0.2737 | 0.3981 |
| 20STYR | R3 | 480 | 16.622 | 9.939  | 6.161 | -0.1959 | 0.2779 | 0.3867 |
| 21STYR | B  | 481 | 16.474 | 9.506  | 6.765 | -0.2407 | 0.2898 | 0.3770 |
| 21STYR | R1 | 482 | 16.327 | 9.722  | 6.718 | -0.2315 | 0.2815 | 0.3568 |
| 21STYR | R2 | 483 | 16.212 | 9.924  | 6.855 | -0.2665 | 0.2712 | 0.3430 |
| 21STYR | R3 | 484 | 16.062 | 9.768  | 6.694 | -0.2335 | 0.2551 | 0.3277 |
| 22STYR | B  | 485 | 16.339 | 9.474  | 6.943 | -0.2513 | 0.2787 | 0.3732 |
| 22STYR | R1 | 486 | 16.596 | 9.472  | 7.000 | -0.2639 | 0.3078 | 0.4000 |
| 22STYR | R2 | 487 | 16.778 | 9.323  | 7.132 | -0.2763 | 0.3136 | 0.4236 |
| 22STYR | R3 | 488 | 16.772 | 9.591  | 7.168 | -0.2896 | 0.3133 | 0.4230 |
| 23STYR | B  | 489 | 16.111 | 9.449  | 7.004 | -0.2566 | 0.2709 | 0.3648 |
| 23STYR | R1 | 490 | 16.190 | 9.333  | 6.774 | -0.2195 | 0.2817 | 0.3533 |
| 23STYR | R2 | 491 | 16.162 | 9.106  | 6.631 | -0.2072 | 0.2690 | 0.3710 |

|        |    |     |        |        |       |         |        |        |
|--------|----|-----|--------|--------|-------|---------|--------|--------|
| 23STYR | R3 | 492 | 16.107 | 9.345  | 6.518 | -0.1863 | 0.2598 | 0.3413 |
| 24STYR | B  | 493 | 15.951 | 9.540  | 7.138 | -0.2809 | 0.2768 | 0.3316 |
| 24STYR | R1 | 494 | 16.211 | 9.594  | 7.192 | -0.2978 | 0.2908 | 0.3419 |
| 24STYR | R2 | 495 | 16.367 | 9.807  | 7.248 | -0.3112 | 0.2987 | 0.3495 |
| 24STYR | R3 | 496 | 16.387 | 9.582  | 7.396 | -0.3300 | 0.3111 | 0.3712 |
| 25STYR | B  | 497 | 15.720 | 9.511  | 7.197 | -0.2837 | 0.2500 | 0.2997 |
| 25STYR | R1 | 498 | 15.788 | 9.475  | 6.937 | -0.2604 | 0.2497 | 0.3074 |
| 25STYR | R2 | 499 | 15.682 | 9.563  | 6.704 | -0.2290 | 0.2371 | 0.2882 |
| 25STYR | R3 | 500 | 15.747 | 9.303  | 6.733 | -0.2207 | 0.2412 | 0.3066 |
| 26STYR | B  | 501 | 15.555 | 9.651  | 7.284 | -0.3123 | 0.2659 | 0.2819 |
| 26STYR | R1 | 502 | 15.800 | 9.699  | 7.360 | -0.3255 | 0.2760 | 0.2973 |
| 26STYR | R2 | 503 | 15.971 | 9.706  | 7.570 | -0.3357 | 0.2805 | 0.3054 |
| 26STYR | R3 | 504 | 15.966 | 9.910  | 7.393 | -0.3328 | 0.2804 | 0.3052 |
| 27STYR | B  | 505 | 15.486 | 9.872  | 7.337 | -0.3334 | 0.2461 | 0.2603 |
| 27STYR | R1 | 506 | 15.384 | 9.759  | 7.117 | -0.3025 | 0.2433 | 0.2551 |
| 27STYR | R2 | 507 | 15.355 | 9.788  | 6.850 | -0.2551 | 0.2265 | 0.2480 |
| 27STYR | R3 | 508 | 15.149 | 9.698  | 6.999 | -0.2750 | 0.2158 | 0.2142 |
| 28STYR | B  | 509 | 15.326 | 10.026 | 7.251 | -0.3178 | 0.2412 | 0.2560 |
| 28STYR | R1 | 510 | 15.522 | 10.140 | 7.375 | -0.3366 | 0.2514 | 0.2471 |
| 28STYR | R2 | 511 | 15.543 | 10.334 | 7.561 | -0.3696 | 0.2702 | 0.2315 |
| 28STYR | R3 | 512 | 15.723 | 10.320 | 7.360 | -0.3440 | 0.2603 | 0.2551 |
| 29STYR | B  | 513 | 15.345 | 10.232 | 7.136 | -0.3253 | 0.2296 | 0.2047 |
| 29STYR | R1 | 514 | 15.118 | 10.121 | 7.098 | -0.3059 | 0.2186 | 0.1795 |
| 29STYR | R2 | 515 | 14.948 | 10.053 | 6.899 | -0.2870 | 0.1929 | 0.1721 |
| 29STYR | R3 | 516 | 14.855 | 10.174 | 7.122 | -0.3105 | 0.2076 | 0.1542 |
| 30STYR | B  | 517 | 15.422 | 10.299 | 6.929 | -0.3086 | 0.2326 | 0.2187 |
| 30STYR | R1 | 518 | 15.377 | 10.488 | 7.108 | -0.3296 | 0.2421 | 0.1953 |
| 30STYR | R2 | 519 | 15.251 | 10.726 | 7.124 | -0.3562 | 0.2289 | 0.1834 |
| 30STYR | R3 | 520 | 15.483 | 10.688 | 7.256 | -0.3782 | 0.2446 | 0.2270 |
| 31STYR | B  | 521 | 15.438 | 10.219 | 6.709 | -0.2548 | 0.2268 | 0.2323 |
| 31STYR | R1 | 522 | 15.624 | 10.141 | 6.903 | -0.3047 | 0.2448 | 0.2674 |
| 31STYR | R2 | 523 | 15.874 | 10.146 | 7.005 | -0.3119 | 0.2586 | 0.2845 |
| 31STYR | R3 | 524 | 15.749 | 9.910  | 6.965 | -0.3013 | 0.2523 | 0.2885 |
| 32STYR | B  | 525 | 15.253 | 10.111 | 6.570 | -0.2516 | 0.1912 | 0.2232 |
| 32STYR | R1 | 526 | 15.191 | 10.348 | 6.686 | -0.2670 | 0.2005 | 0.1970 |
| 32STYR | R2 | 527 | 15.066 | 10.570 | 6.595 | -0.2784 | 0.1864 | 0.1782 |
| 32STYR | R3 | 528 | 15.009 | 10.475 | 6.841 | -0.2959 | 0.1871 | 0.1744 |
| 33STYR | B  | 529 | 15.258 | 9.993  | 6.366 | -0.2243 | 0.1972 | 0.2134 |
| 33STYR | R1 | 530 | 15.075 | 9.905  | 6.521 | -0.2408 | 0.1971 | 0.1970 |
| 33STYR | R2 | 531 | 14.809 | 9.860  | 6.535 | -0.2359 | 0.1633 | 0.1825 |
| 33STYR | R3 | 532 | 14.982 | 9.672  | 6.621 | -0.2167 | 0.1913 | 0.2057 |
| 34STYR | B  | 533 | 15.242 | 9.904  | 6.172 | -0.2134 | 0.1934 | 0.2332 |
| 34STYR | R1 | 534 | 15.485 | 9.890  | 6.294 | -0.2021 | 0.1917 | 0.2441 |
| 34STYR | R2 | 535 | 15.668 | 9.920  | 6.491 | -0.2447 | 0.2401 | 0.2766 |
| 34STYR | R3 | 536 | 15.730 | 9.989  | 6.237 | -0.2054 | 0.2212 | 0.2810 |
| 35STYR | B  | 537 | 15.182 | 9.760  | 5.997 | -0.1511 | 0.1598 | 0.2308 |
| 35STYR | R1 | 538 | 15.225 | 10.001 | 5.926 | -0.1589 | 0.1936 | 0.2339 |
| 35STYR | R2 | 539 | 15.102 | 10.184 | 5.770 | -0.1656 | 0.1606 | 0.2003 |
| 35STYR | R3 | 540 | 15.369 | 10.150 | 5.752 | -0.1612 | 0.1829 | 0.2227 |
| 36STYR | B  | 541 | 15.137 | 9.710  | 5.784 | -0.1218 | 0.1493 | 0.2071 |
| 36STYR | R1 | 542 | 14.988 | 9.591  | 5.980 | -0.1558 | 0.1388 | 0.1958 |
| 36STYR | R2 | 543 | 14.719 | 9.569  | 5.961 | -0.1559 | 0.1569 | 0.1744 |
| 36STYR | R3 | 544 | 14.836 | 9.599  | 6.203 | -0.1730 | 0.1477 | 0.1838 |
| 37STYR | B  | 545 | 15.081 | 9.795  | 5.569 | -0.1016 | 0.1353 | 0.1933 |
| 37STYR | R1 | 546 | 15.260 | 9.617  | 5.559 | -0.0989 | 0.1653 | 0.2373 |
| 37STYR | R2 | 547 | 15.308 | 9.403  | 5.401 | -0.0636 | 0.1598 | 0.2553 |
| 37STYR | R3 | 548 | 15.501 | 9.588  | 5.439 | -0.0818 | 0.1759 | 0.2691 |
| 38STYR | B  | 549 | 14.936 | 9.928  | 5.436 | -0.1082 | 0.1415 | 0.1986 |
| 38STYR | R1 | 550 | 15.188 | 9.958  | 5.387 | -0.0954 | 0.1441 | 0.2190 |
| 38STYR | R2 | 551 | 15.341 | 10.174 | 5.333 | -0.0976 | 0.1478 | 0.2273 |
| 38STYR | R3 | 552 | 15.375 | 9.946  | 5.193 | -0.0756 | 0.1447 | 0.2379 |
| 39STYR | B  | 553 | 14.718 | 10.020 | 5.485 | -0.1278 | 0.1235 | 0.1621 |
| 39STYR | R1 | 554 | 14.867 | 10.175 | 5.339 | -0.1128 | 0.1250 | 0.1640 |
| 39STYR | R2 | 555 | 14.972 | 10.423 | 5.317 | -0.1228 | 0.1294 | 0.1664 |
| 39STYR | R3 | 556 | 14.841 | 10.312 | 5.108 | -0.0970 | 0.1165 | 0.1572 |
| 40STYR | B  | 557 | 14.661 | 10.228 | 5.566 | -0.1369 | 0.1122 | 0.1330 |
| 40STYR | R1 | 558 | 14.674 | 10.047 | 5.743 | -0.1530 | 0.1376 | 0.1522 |
| 40STYR | R2 | 559 | 14.516 | 9.951  | 5.940 | -0.1648 | 0.1226 | 0.1356 |
| 40STYR | R3 | 560 | 14.780 | 9.988  | 5.984 | -0.1741 | 0.1544 | 0.1656 |
| 41STYR | B  | 561 | 14.694 | 10.417 | 5.701 | -0.1718 | 0.1225 | 0.1407 |
| 41STYR | R1 | 562 | 14.520 | 10.421 | 5.485 | -0.1474 | 0.1047 | 0.1091 |
| 41STYR | R2 | 563 | 14.268 | 10.471 | 5.403 | -0.1435 | 0.0973 | 0.0928 |
| 41STYR | R3 | 564 | 14.478 | 10.559 | 5.257 | -0.1367 | 0.0934 | 0.1003 |



|        |    |     |        |        |       |         |         |         |
|--------|----|-----|--------|--------|-------|---------|---------|---------|
| 42STYR | B  | 565 | 14.754 | 10.504 | 5.921 | -0.1870 | 0.1502  | 0.1448  |
| 42STYR | R1 | 566 | 14.924 | 10.570 | 5.729 | -0.1844 | 0.1623  | 0.1495  |
| 42STYR | R2 | 567 | 15.191 | 10.578 | 5.688 | -0.1802 | 0.1623  | 0.1763  |
| 42STYR | R3 | 568 | 15.036 | 10.784 | 5.607 | -0.1693 | 0.1721  | 0.1803  |
| 43STYR | B  | 569 | 14.888 | 10.409 | 6.098 | -0.2275 | 0.1569  | 0.1625  |
| 43STYR | R1 | 570 | 14.725 | 10.587 | 6.182 | -0.2291 | 0.1615  | 0.1182  |
| 43STYR | R2 | 571 | 14.738 | 10.797 | 6.352 | -0.2471 | 0.1709  | 0.1079  |
| 43STYR | R3 | 572 | 14.537 | 10.618 | 6.374 | -0.2362 | 0.1590  | 0.1117  |
| 44STYR | B  | 573 | 15.078 | 10.350 | 6.180 | -0.2200 | 0.1363  | 0.1909  |
| 44STYR | R1 | 574 | 14.868 | 10.251 | 6.305 | -0.2403 | 0.1870  | 0.1585  |
| 44STYR | R2 | 575 | 14.611 | 10.177 | 6.342 | -0.2255 | 0.1300  | 0.1490  |
| 44STYR | R3 | 576 | 14.756 | 10.271 | 6.549 | -0.2464 | 0.1382  | 0.1599  |
| 45STYR | B  | 577 | 15.319 | 10.381 | 6.152 | -0.2203 | 0.2040  | 0.2086  |
| 45STYR | R1 | 578 | 15.170 | 10.604 | 6.165 | -0.2521 | 0.1686  | 0.1878  |
| 45STYR | R2 | 579 | 15.178 | 10.840 | 6.296 | -0.2598 | 0.1758  | 0.1754  |
| 45STYR | R3 | 580 | 15.112 | 10.833 | 6.034 | -0.2237 | 0.1638  | 0.1666  |
| 46STYR | B  | 581 | 15.484 | 10.412 | 6.312 | -0.2385 | 0.2079  | 0.2110  |
| 46STYR | R1 | 582 | 15.572 | 10.388 | 6.071 | -0.2186 | 0.2153  | 0.2261  |
| 46STYR | R2 | 583 | 15.749 | 10.253 | 5.919 | -0.1842 | 0.2068  | 0.2732  |
| 46STYR | R3 | 584 | 15.740 | 10.522 | 5.907 | -0.1898 | 0.2056  | 0.2473  |
| 47STYR | B  | 585 | 15.700 | 10.405 | 6.394 | -0.2591 | 0.2209  | 0.2543  |
| 47STYR | R1 | 586 | 15.543 | 10.597 | 6.490 | -0.2746 | 0.2149  | 0.2225  |
| 47STYR | R2 | 587 | 15.551 | 10.864 | 6.525 | -0.2944 | 0.2167  | 0.2129  |
| 47STYR | R3 | 588 | 15.455 | 10.705 | 6.721 | -0.3076 | 0.2188  | 0.2082  |
| 48STYR | B  | 589 | 15.855 | 10.315 | 6.544 | -0.2598 | 0.2420  | 0.2597  |
| 48STYR | R1 | 590 | 15.957 | 10.409 | 6.321 | -0.2324 | 0.2315  | 0.2801  |
| 48STYR | R2 | 591 | 16.120 | 10.352 | 6.113 | -0.2068 | 0.2445  | 0.2964  |
| 48STYR | R3 | 592 | 16.150 | 10.584 | 6.248 | -0.2447 | 0.2509  | 0.2941  |
| 49STYR | B  | 593 | 16.063 | 10.306 | 6.647 | -0.2536 | 0.2706  | 0.2870  |
| 49STYR | R1 | 594 | 15.895 | 10.488 | 6.740 | -0.2785 | 0.2567  | 0.2771  |
| 49STYR | R2 | 595 | 15.793 | 10.573 | 6.975 | -0.3167 | 0.2510  | 0.2625  |
| 49STYR | R3 | 596 | 15.884 | 10.752 | 6.795 | -0.3246 | 0.2574  | 0.2649  |
| 50STYR | B  | 597 | 16.213 | 10.417 | 6.795 | -0.2925 | 0.2529  | 0.3152  |
| 50STYR | R1 | 598 | 16.324 | 10.281 | 6.597 | -0.2318 | 0.2646  | 0.3356  |
| 50STYR | R2 | 599 | 16.485 | 10.297 | 6.381 | -0.2340 | 0.2576  | 0.3335  |
| 50STYR | R3 | 600 | 16.511 | 10.092 | 6.555 | -0.2324 | 0.2631  | 0.3399  |
| 1STYR  | B  | 601 | 10.576 | 7.265  | 2.070 | 0.4410  | -0.2797 | -0.2093 |
| 1STYR  | R1 | 602 | 10.317 | 7.306  | 2.012 | 0.4549  | -0.3082 | -0.2437 |
| 1STYR  | R2 | 603 | 10.068 | 7.219  | 2.069 | 0.4531  | -0.3136 | -0.2598 |
| 1STYR  | R3 | 604 | 10.136 | 7.278  | 1.814 | 0.4683  | -0.3123 | -0.2554 |
| 2STYR  | B  | 605 | 10.533 | 7.470  | 1.946 | 0.4408  | -0.2946 | -0.1989 |
| 2STYR  | R1 | 606 | 10.773 | 7.463  | 2.072 | 0.4223  | -0.2776 | -0.1813 |
| 2STYR  | R2 | 607 | 11.038 | 7.487  | 2.025 | 0.4211  | -0.2565 | -0.1772 |
| 2STYR  | R3 | 608 | 10.929 | 7.599  | 2.246 | 0.4074  | -0.2587 | -0.1828 |
| 3STYR  | B  | 609 | 10.616 | 7.691  | 1.910 | 0.4345  | -0.2932 | -0.2141 |
| 3STYR  | R1 | 610 | 10.429 | 7.622  | 1.739 | 0.4463  | -0.3301 | -0.2441 |
| 3STYR  | R2 | 611 | 10.381 | 7.615  | 1.474 | 0.4770  | -0.3165 | -0.2501 |
| 3STYR  | R3 | 612 | 10.186 | 7.691  | 1.644 | 0.4614  | -0.3122 | -0.2698 |
| 4STYR  | B  | 613 | 10.579 | 7.904  | 1.816 | 0.4477  | -0.2937 | -0.2342 |
| 4STYR  | R1 | 614 | 10.828 | 7.848  | 1.864 | 0.4297  | -0.2730 | -0.1831 |
| 4STYR  | R2 | 615 | 11.067 | 7.874  | 1.740 | 0.4333  | -0.2709 | -0.1758 |
| 4STYR  | R3 | 616 | 11.045 | 7.927  | 2.004 | 0.4181  | -0.2413 | -0.1829 |
| 5STYR  | B  | 617 | 10.654 | 8.127  | 1.788 | 0.4224  | -0.2974 | -0.2412 |
| 5STYR  | R1 | 618 | 10.426 | 8.058  | 1.666 | 0.4593  | -0.3086 | -0.2568 |
| 5STYR  | R2 | 619 | 10.315 | 8.059  | 1.419 | 0.4741  | -0.3160 | -0.2635 |
| 5STYR  | R3 | 620 | 10.167 | 8.126  | 1.635 | 0.4548  | -0.3324 | -0.2717 |
| 6STYR  | B  | 621 | 10.838 | 8.288  | 1.834 | 0.4125  | -0.2977 | -0.2208 |
| 6STYR  | R1 | 622 | 10.781 | 8.208  | 1.576 | 0.4635  | -0.2988 | -0.2333 |
| 6STYR  | R2 | 623 | 10.874 | 8.076  | 1.360 | 0.4810  | -0.3067 | -0.2209 |
| 6STYR  | R3 | 624 | 10.733 | 8.304  | 1.328 | 0.4622  | -0.3213 | -0.2417 |
| 7STYR  | B  | 625 | 10.874 | 8.385  | 2.056 | 0.3970  | -0.2593 | -0.2195 |
| 7STYR  | R1 | 626 | 11.099 | 8.347  | 1.921 | 0.4020  | -0.2497 | -0.2023 |
| 7STYR  | R2 | 627 | 11.326 | 8.482  | 1.863 | 0.4102  | -0.2552 | -0.1829 |
| 7STYR  | R3 | 628 | 11.338 | 8.223  | 1.941 | 0.3986  | -0.2506 | -0.1660 |
| 8STYR  | B  | 629 | 10.719 | 8.454  | 2.225 | 0.3442  | -0.2521 | -0.2333 |
| 8STYR  | R1 | 630 | 10.792 | 8.209  | 2.237 | 0.3614  | -0.2731 | -0.2329 |
| 8STYR  | R2 | 631 | 10.665 | 7.972  | 2.262 | 0.3721  | -0.2762 | -0.2084 |
| 8STYR  | R3 | 632 | 10.890 | 8.021  | 2.403 | 0.3507  | -0.2383 | -0.1871 |
| 9STYR  | B  | 633 | 10.597 | 8.682  | 2.216 | 0.3383  | -0.2737 | -0.2756 |
| 9STYR  | R1 | 634 | 10.874 | 8.668  | 2.220 | 0.3447  | -0.2643 | -0.2403 |
| 9STYR  | R2 | 635 | 11.095 | 8.767  | 2.102 | 0.3561  | -0.2565 | -0.2124 |
| 9STYR  | R3 | 636 | 11.075 | 8.765  | 2.371 | 0.3111  | -0.2327 | -0.2155 |
| 10STYR | B  | 637 | 10.652 | 8.802  | 2.022 | 0.3525  | -0.2809 | -0.2511 |

|        |    |     |        |       |       |        |         |         |
|--------|----|-----|--------|-------|-------|--------|---------|---------|
| 10STYR | R1 | 638 | 10.456 | 8.632 | 2.010 | 0.3832 | -0.2878 | -0.2772 |
| 10STYR | R2 | 639 | 10.355 | 8.394 | 1.933 | 0.4016 | -0.2978 | -0.2702 |
| 10STYR | R3 | 640 | 10.207 | 8.618 | 1.905 | 0.4048 | -0.3026 | -0.3268 |
| 11STYR | B  | 641 | 10.685 | 8.759 | 1.799 | 0.4002 | -0.3030 | -0.2666 |
| 11STYR | R1 | 642 | 10.760 | 8.992 | 1.917 | 0.3532 | -0.2647 | -0.2435 |
| 11STYR | R2 | 643 | 10.976 | 9.145 | 1.968 | 0.3534 | -0.2678 | -0.2348 |
| 11STYR | R3 | 644 | 10.736 | 9.261 | 1.928 | 0.3645 | -0.2619 | -0.2849 |
| 12STYR | B  | 645 | 10.859 | 8.675 | 1.655 | 0.4185 | -0.2772 | -0.2366 |
| 12STYR | R1 | 646 | 10.597 | 8.651 | 1.580 | 0.4238 | -0.3056 | -0.2607 |
| 12STYR | R2 | 647 | 10.449 | 8.686 | 1.357 | 0.4373 | -0.3165 | -0.2714 |
| 12STYR | R3 | 648 | 10.399 | 8.478 | 1.522 | 0.4378 | -0.3177 | -0.2728 |
| 13STYR | B  | 649 | 11.083 | 8.782 | 1.638 | 0.4207 | -0.2617 | -0.2329 |
| 13STYR | R1 | 650 | 11.067 | 8.553 | 1.513 | 0.4271 | -0.2722 | -0.2018 |
| 13STYR | R2 | 651 | 11.202 | 8.320 | 1.491 | 0.4568 | -0.2576 | -0.1765 |
| 13STYR | R3 | 652 | 11.135 | 8.459 | 1.269 | 0.4696 | -0.2728 | -0.1899 |
| 14STYR | B  | 653 | 11.113 | 9.023 | 1.572 | 0.3986 | -0.2873 | -0.2332 |
| 14STYR | R1 | 654 | 11.310 | 8.890 | 1.719 | 0.3825 | -0.2552 | -0.2080 |
| 14STYR | R2 | 655 | 11.568 | 8.813 | 1.713 | 0.3848 | -0.2506 | -0.1706 |
| 14STYR | R3 | 656 | 11.461 | 8.906 | 1.942 | 0.3536 | -0.2399 | -0.1895 |
| 15STYR | B  | 657 | 10.909 | 9.154 | 1.532 | 0.3989 | -0.2889 | -0.2539 |
| 15STYR | R1 | 658 | 10.960 | 8.979 | 1.345 | 0.4211 | -0.2930 | -0.2408 |
| 15STYR | R2 | 659 | 10.968 | 8.978 | 1.075 | 0.4632 | -0.3065 | -0.2395 |
| 15STYR | R3 | 660 | 10.839 | 8.780 | 1.207 | 0.4518 | -0.3056 | -0.2494 |
| 16STYR | B  | 661 | 10.681 | 9.122 | 1.496 | 0.4005 | -0.3188 | -0.2808 |
| 16STYR | R1 | 662 | 10.779 | 9.370 | 1.516 | 0.3847 | -0.2909 | -0.2802 |
| 16STYR | R2 | 663 | 10.801 | 9.610 | 1.392 | 0.3895 | -0.2900 | -0.2775 |
| 16STYR | R3 | 664 | 10.729 | 9.598 | 1.652 | 0.3598 | -0.2930 | -0.2858 |
| 17STYR | B  | 665 | 10.446 | 9.088 | 1.564 | 0.4058 | -0.3242 | -0.2927 |
| 17STYR | R1 | 666 | 10.520 | 9.119 | 1.296 | 0.4213 | -0.3143 | -0.2943 |
| 17STYR | R2 | 667 | 10.471 | 9.273 | 1.080 | 0.4423 | -0.3219 | -0.3044 |
| 17STYR | R3 | 668 | 10.490 | 9.005 | 1.053 | 0.4587 | -0.3217 | -0.2954 |
| 18STYR | B  | 669 | 10.343 | 9.045 | 1.779 | 0.3974 | -0.2989 | -0.3213 |
| 18STYR | R1 | 670 | 10.196 | 8.963 | 1.595 | 0.4008 | -0.3336 | -0.3245 |
| 18STYR | R2 | 671 | 9.939  | 8.996 | 1.519 | 0.4136 | -0.3443 | -0.3730 |
| 18STYR | R3 | 672 | 10.047 | 8.749 | 1.525 | 0.4171 | -0.3419 | -0.3339 |
| 19STYR | B  | 673 | 10.320 | 9.091 | 2.004 | 0.3340 | -0.2989 | -0.3109 |
| 19STYR | R1 | 674 | 10.275 | 9.284 | 1.830 | 0.3597 | -0.3163 | -0.3387 |
| 19STYR | R2 | 675 | 10.332 | 9.541 | 1.768 | 0.3472 | -0.3154 | -0.3463 |
| 19STYR | R3 | 676 | 10.076 | 9.457 | 1.773 | 0.3526 | -0.3333 | -0.3656 |
| 20STYR | B  | 677 | 10.283 | 9.022 | 2.223 | 0.3175 | -0.2667 | -0.3199 |
| 20STYR | R1 | 678 | 10.077 | 9.022 | 2.051 | 0.3452 | -0.3141 | -0.3368 |
| 20STYR | R2 | 679 | 9.878  | 8.877 | 1.941 | 0.3626 | -0.3162 | -0.3656 |
| 20STYR | R3 | 680 | 9.839  | 9.138 | 1.997 | 0.3482 | -0.3193 | -0.3610 |
| 21STYR | B  | 681 | 10.328 | 9.083 | 2.449 | 0.2864 | -0.2726 | -0.3113 |
| 21STYR | R1 | 682 | 10.334 | 9.284 | 2.269 | 0.3039 | -0.2812 | -0.3311 |
| 21STYR | R2 | 683 | 10.473 | 9.494 | 2.173 | 0.3001 | -0.2766 | -0.3264 |
| 21STYR | R3 | 684 | 10.210 | 9.520 | 2.227 | 0.2941 | -0.2894 | -0.3488 |
| 22STYR | B  | 685 | 10.349 | 9.272 | 2.589 | 0.2563 | -0.2525 | -0.3052 |
| 22STYR | R1 | 686 | 10.104 | 9.189 | 2.520 | 0.2740 | -0.2802 | -0.3585 |
| 22STYR | R2 | 687 | 9.866  | 9.154 | 2.642 | 0.2707 | -0.2896 | -0.3676 |
| 22STYR | R3 | 688 | 9.878  | 9.277 | 2.402 | 0.2731 | -0.3058 | -0.3758 |
| 23STYR | B  | 689 | 10.341 | 9.314 | 2.827 | 0.2380 | -0.2623 | -0.3197 |
| 23STYR | R1 | 690 | 10.231 | 9.495 | 2.678 | 0.2427 | -0.2625 | -0.3454 |
| 23STYR | R2 | 691 | 10.219 | 9.763 | 2.649 | 0.2208 | -0.2652 | -0.3618 |
| 23STYR | R3 | 692 | 9.991  | 9.619 | 2.661 | 0.2330 | -0.2867 | -0.3871 |
| 24STYR | B  | 693 | 10.405 | 9.178 | 3.009 | 0.2251 | -0.2463 | -0.3278 |
| 24STYR | R1 | 694 | 10.172 | 9.289 | 3.039 | 0.1996 | -0.2460 | -0.3639 |
| 24STYR | R2 | 695 | 10.039 | 9.426 | 3.230 | 0.1874 | -0.2582 | -0.3636 |
| 24STYR | R3 | 696 | 9.915  | 9.229 | 3.094 | 0.2039 | -0.2667 | -0.3663 |
| 25STYR | B  | 697 | 10.543 | 9.008 | 3.073 | 0.2041 | -0.2414 | -0.2839 |
| 25STYR | R1 | 698 | 10.665 | 9.220 | 3.011 | 0.2063 | -0.2196 | -0.2777 |
| 25STYR | R2 | 699 | 10.861 | 9.376 | 3.112 | 0.1907 | -0.2021 | -0.2741 |
| 25STYR | R3 | 700 | 10.884 | 9.276 | 2.862 | 0.2224 | -0.2330 | -0.2589 |
| 26STYR | B  | 701 | 10.563 | 8.790 | 3.082 | 0.2485 | -0.2266 | -0.2721 |
| 26STYR | R1 | 702 | 10.324 | 8.880 | 3.014 | 0.2277 | -0.2671 | -0.3045 |
| 26STYR | R2 | 703 | 10.137 | 8.881 | 2.820 | 0.2535 | -0.2834 | -0.3296 |
| 26STYR | R3 | 704 | 10.065 | 8.835 | 3.076 | 0.2201 | -0.2673 | -0.3360 |
| 27STYR | B  | 705 | 10.650 | 8.586 | 3.057 | 0.2641 | -0.2407 | -0.2541 |
| 27STYR | R1 | 706 | 10.586 | 8.724 | 2.846 | 0.2820 | -0.2450 | -0.2774 |
| 27STYR | R2 | 707 | 10.445 | 8.690 | 2.618 | 0.2962 | -0.2611 | -0.2838 |
| 27STYR | R3 | 708 | 10.674 | 8.834 | 2.615 | 0.2806 | -0.2361 | -0.2737 |
| 28STYR | B  | 709 | 10.531 | 8.370 | 3.051 | 0.2608 | -0.2312 | -0.2808 |
| 28STYR | R1 | 710 | 10.483 | 8.540 | 3.259 | 0.2376 | -0.2374 | -0.2781 |

|        |    |     |        |       |       |        |         |         |
|--------|----|-----|--------|-------|-------|--------|---------|---------|
| 28STYR | R2 | 711 | 10.276 | 8.652 | 3.392 | 0.2106 | -0.2412 | -0.3164 |
| 28STYR | R3 | 712 | 10.483 | 8.545 | 3.529 | 0.2004 | -0.2129 | -0.2785 |
| 29STYR | B  | 713 | 10.307 | 8.357 | 2.969 | 0.2573 | -0.2546 | -0.2735 |
| 29STYR | R1 | 714 | 10.476 | 8.151 | 2.919 | 0.2854 | -0.2427 | -0.2597 |
| 29STYR | R2 | 715 | 10.502 | 7.883 | 2.937 | 0.2939 | -0.2406 | -0.2412 |
| 29STYR | R3 | 716 | 10.581 | 8.012 | 2.713 | 0.3264 | -0.2490 | -0.2348 |
| 30STYR | B  | 717 | 10.145 | 8.445 | 2.820 | 0.2925 | -0.2694 | -0.3247 |
| 30STYR | R1 | 718 | 10.056 | 8.383 | 3.068 | 0.2479 | -0.2657 | -0.3285 |
| 30STYR | R2 | 719 | 9.917  | 8.488 | 3.274 | 0.2439 | -0.2543 | -0.3371 |
| 30STYR | R3 | 720 | 9.881  | 8.230 | 3.205 | 0.2480 | -0.2591 | -0.3211 |
| 31STYR | B  | 721 | 9.929  | 8.391 | 2.753 | 0.3251 | -0.2727 | -0.3326 |
| 31STYR | R1 | 722 | 10.041 | 8.536 | 2.574 | 0.3037 | -0.2847 | -0.3271 |
| 31STYR | R2 | 723 | 10.094 | 8.555 | 2.310 | 0.3511 | -0.2967 | -0.3184 |
| 31STYR | R3 | 724 | 9.978  | 8.761 | 2.439 | 0.3148 | -0.2963 | -0.3516 |
| 32STYR | B  | 725 | 9.749  | 8.329 | 2.608 | 0.3178 | -0.2743 | -0.3481 |
| 32STYR | R1 | 726 | 9.733  | 8.533 | 2.802 | 0.2905 | -0.2942 | -0.3629 |
| 32STYR | R2 | 727 | 9.596  | 8.625 | 3.015 | 0.2510 | -0.2899 | -0.3900 |
| 32STYR | R3 | 728 | 9.691  | 8.799 | 2.831 | 0.2569 | -0.2961 | -0.3928 |
| 33STYR | B  | 729 | 9.777  | 8.156 | 2.425 | 0.3450 | -0.3129 | -0.3300 |
| 33STYR | R1 | 730 | 9.666  | 8.386 | 2.353 | 0.3359 | -0.3156 | -0.3576 |
| 33STYR | R2 | 731 | 9.676  | 8.590 | 2.178 | 0.3629 | -0.3276 | -0.3702 |
| 33STYR | R3 | 732 | 9.451  | 8.442 | 2.200 | 0.3562 | -0.3204 | -0.3880 |
| 34STYR | B  | 733 | 9.889  | 8.145 | 2.215 | 0.3844 | -0.3121 | -0.3288 |
| 34STYR | R1 | 734 | 9.665  | 7.999 | 2.240 | 0.3701 | -0.3219 | -0.3471 |
| 34STYR | R2 | 735 | 9.549  | 7.756 | 2.215 | 0.4033 | -0.3396 | -0.3308 |
| 34STYR | R3 | 736 | 9.434  | 7.973 | 2.102 | 0.3934 | -0.3690 | -0.3778 |
| 35STYR | B  | 737 | 10.069 | 8.101 | 2.066 | 0.4103 | -0.2960 | -0.3181 |
| 35STYR | R1 | 738 | 9.871  | 8.241 | 1.964 | 0.3970 | -0.3290 | -0.3401 |
| 35STYR | R2 | 739 | 9.682  | 8.236 | 1.771 | 0.4125 | -0.3448 | -0.3551 |
| 35STYR | R3 | 740 | 9.833  | 8.457 | 1.806 | 0.3896 | -0.3311 | -0.3412 |
| 36STYR | B  | 741 | 10.246 | 7.925 | 2.085 | 0.4068 | -0.3009 | -0.2930 |
| 36STYR | R1 | 742 | 10.229 | 8.115 | 2.276 | 0.3635 | -0.2867 | -0.2832 |
| 36STYR | R2 | 743 | 10.384 | 8.280 | 2.423 | 0.3425 | -0.2717 | -0.2776 |
| 36STYR | R3 | 744 | 10.208 | 8.115 | 2.545 | 0.3532 | -0.2878 | -0.2839 |
| 37STYR | B  | 745 | 10.159 | 7.691 | 2.094 | 0.4140 | -0.3156 | -0.2620 |
| 37STYR | R1 | 746 | 10.321 | 7.732 | 2.282 | 0.4050 | -0.2694 | -0.2593 |
| 37STYR | R2 | 747 | 10.531 | 7.606 | 2.397 | 0.3917 | -0.2671 | -0.2328 |
| 37STYR | R3 | 748 | 10.342 | 7.724 | 2.551 | 0.3702 | -0.2704 | -0.2565 |
| 38STYR | B  | 749 | 9.990  | 7.634 | 2.253 | 0.4226 | -0.2924 | -0.2913 |
| 38STYR | R1 | 750 | 9.919  | 7.672 | 1.999 | 0.4301 | -0.3207 | -0.3130 |
| 38STYR | R2 | 751 | 9.778  | 7.550 | 1.803 | 0.4359 | -0.3395 | -0.3055 |
| 38STYR | R3 | 752 | 9.768  | 7.819 | 1.830 | 0.4353 | -0.3369 | -0.3317 |
| 39STYR | B  | 753 | 9.918  | 7.706 | 2.477 | 0.3733 | -0.3069 | -0.2997 |
| 39STYR | R1 | 754 | 9.840  | 7.460 | 2.396 | 0.3846 | -0.3036 | -0.3011 |
| 39STYR | R2 | 755 | 9.606  | 7.326 | 2.373 | 0.3988 | -0.3262 | -0.3162 |
| 39STYR | R3 | 756 | 9.827  | 7.197 | 2.459 | 0.4033 | -0.3023 | -0.2917 |
| 40STYR | B  | 757 | 9.914  | 7.569 | 2.671 | 0.3653 | -0.2973 | -0.3001 |
| 40STYR | R1 | 758 | 9.930  | 7.811 | 2.727 | 0.3193 | -0.2984 | -0.2935 |
| 40STYR | R2 | 759 | 9.792  | 7.978 | 2.889 | 0.3083 | -0.2826 | -0.3191 |
| 40STYR | R3 | 760 | 10.062 | 7.973 | 2.900 | 0.3076 | -0.2807 | -0.3010 |
| 41STYR | B  | 761 | 10.054 | 7.512 | 2.850 | 0.3359 | -0.2817 | -0.2750 |
| 41STYR | R1 | 762 | 9.807  | 7.433 | 2.868 | 0.3488 | -0.2893 | -0.2993 |
| 41STYR | R2 | 763 | 9.603  | 7.434 | 3.045 | 0.3240 | -0.2979 | -0.3277 |
| 41STYR | R3 | 764 | 9.661  | 7.209 | 2.909 | 0.3614 | -0.2993 | -0.3095 |
| 42STYR | B  | 765 | 10.277 | 7.488 | 2.911 | 0.3283 | -0.2551 | -0.2535 |
| 42STYR | R1 | 766 | 10.200 | 7.350 | 2.705 | 0.3716 | -0.2632 | -0.2450 |
| 42STYR | R2 | 767 | 10.214 | 7.091 | 2.628 | 0.3720 | -0.2690 | -0.2255 |
| 42STYR | R3 | 768 | 10.265 | 7.288 | 2.450 | 0.4056 | -0.2832 | -0.2315 |
| 43STYR | B  | 769 | 10.496 | 7.435 | 2.856 | 0.3507 | -0.2392 | -0.2137 |
| 43STYR | R1 | 770 | 10.387 | 7.303 | 3.053 | 0.3166 | -0.2386 | -0.2270 |
| 43STYR | R2 | 771 | 10.342 | 7.046 | 3.121 | 0.3457 | -0.2442 | -0.2288 |
| 43STYR | R3 | 772 | 10.424 | 7.223 | 3.308 | 0.2980 | -0.2296 | -0.2214 |
| 44STYR | B  | 773 | 10.707 | 7.364 | 2.956 | 0.3208 | -0.2167 | -0.1954 |
| 44STYR | R1 | 774 | 10.655 | 7.280 | 2.707 | 0.3684 | -0.2580 | -0.1816 |
| 44STYR | R2 | 775 | 10.778 | 7.265 | 2.468 | 0.3941 | -0.2525 | -0.1688 |
| 44STYR | R3 | 776 | 10.649 | 7.050 | 2.566 | 0.4052 | -0.2625 | -0.1759 |
| 45STYR | B  | 777 | 10.828 | 7.446 | 3.149 | 0.2936 | -0.2097 | -0.1834 |
| 45STYR | R1 | 778 | 10.831 | 7.178 | 3.096 | 0.3454 | -0.2164 | -0.1839 |
| 45STYR | R2 | 779 | 11.005 | 6.972 | 3.088 | 0.3589 | -0.2074 | -0.1258 |
| 45STYR | R3 | 780 | 10.751 | 6.931 | 3.171 | 0.3455 | -0.2118 | -0.1685 |
| 46STYR | B  | 781 | 10.807 | 7.698 | 3.226 | 0.2958 | -0.2131 | -0.2144 |
| 46STYR | R1 | 782 | 10.893 | 7.624 | 2.959 | 0.3362 | -0.2029 | -0.1690 |
| 46STYR | R2 | 783 | 10.855 | 7.684 | 2.699 | 0.3410 | -0.2329 | -0.1767 |

|        |    |     |        |       |       |        |         |         |
|--------|----|-----|--------|-------|-------|--------|---------|---------|
| 46STYR | R3 | 784 | 11.104 | 7.635 | 2.791 | 0.3411 | -0.2076 | -0.1632 |
| 47STYR | B  | 785 | 10.584 | 7.721 | 3.354 | 0.2589 | -0.2104 | -0.2015 |
| 47STYR | R1 | 786 | 10.750 | 7.924 | 3.399 | 0.2480 | -0.2082 | -0.2008 |
| 47STYR | R2 | 787 | 10.880 | 8.058 | 3.594 | 0.2251 | -0.2003 | -0.1910 |
| 47STYR | R3 | 788 | 10.695 | 8.184 | 3.444 | 0.2456 | -0.2052 | -0.2206 |
| 48STYR | B  | 789 | 10.362 | 7.691 | 3.303 | 0.2868 | -0.2401 | -0.2556 |
| 48STYR | R1 | 790 | 10.436 | 7.607 | 3.540 | 0.2553 | -0.2053 | -0.2323 |
| 48STYR | R2 | 791 | 10.417 | 7.395 | 3.706 | 0.2489 | -0.2029 | -0.2299 |
| 48STYR | R3 | 792 | 10.369 | 7.643 | 3.799 | 0.2090 | -0.2051 | -0.2442 |
| 49STYR | B  | 793 | 10.138 | 7.731 | 3.256 | 0.2856 | -0.2509 | -0.2807 |
| 49STYR | R1 | 794 | 10.264 | 7.920 | 3.389 | 0.2520 | -0.2328 | -0.2739 |
| 49STYR | R2 | 795 | 10.273 | 8.056 | 3.622 | 0.2316 | -0.2305 | -0.2744 |
| 49STYR | R3 | 796 | 10.277 | 8.190 | 3.388 | 0.2362 | -0.2320 | -0.2753 |
| 50STYR | B  | 797 | 9.905  | 7.744 | 3.273 | 0.2692 | -0.2628 | -0.2968 |
| 50STYR | R1 | 798 | 10.019 | 7.506 | 3.314 | 0.2889 | -0.2526 | -0.2748 |
| 50STYR | R2 | 799 | 10.033 | 7.303 | 3.492 | 0.2854 | -0.2530 | -0.2750 |
| 50STYR | R3 | 800 | 9.981  | 7.251 | 3.232 | 0.3088 | -0.2540 | -0.2795 |
| 1STYR  | B  | 801 | 11.274 | 7.369 | 3.163 | 0.3186 | -0.1944 | -0.1071 |
| 1STYR  | R1 | 802 | 11.282 | 7.258 | 2.928 | 0.3558 | -0.1870 | -0.1251 |
| 1STYR  | R2 | 803 | 11.351 | 7.311 | 2.672 | 0.3883 | -0.2053 | -0.1201 |
| 1STYR  | R3 | 804 | 11.107 | 7.210 | 2.727 | 0.3848 | -0.2105 | -0.1449 |
| 2STYR  | B  | 805 | 11.243 | 7.397 | 3.391 | 0.2847 | -0.1755 | -0.1343 |
| 2STYR  | R1 | 806 | 11.451 | 7.253 | 3.312 | 0.2880 | -0.1750 | -0.1055 |
| 2STYR  | R2 | 807 | 11.552 | 7.004 | 3.337 | 0.3159 | -0.1611 | -0.0789 |
| 2STYR  | R3 | 808 | 11.718 | 7.216 | 3.325 | 0.2906 | -0.1404 | -0.0626 |
| 3STYR  | B  | 809 | 11.235 | 7.374 | 3.623 | 0.2508 | -0.1752 | -0.1252 |
| 3STYR  | R1 | 810 | 11.049 | 7.254 | 3.507 | 0.2827 | -0.1804 | -0.1381 |
| 3STYR  | R2 | 811 | 10.783 | 7.217 | 3.538 | 0.2819 | -0.2024 | -0.1708 |
| 3STYR  | R3 | 812 | 10.949 | 7.004 | 3.531 | 0.3010 | -0.1884 | -0.1457 |
| 4STYR  | B  | 813 | 11.250 | 7.449 | 3.847 | 0.2327 | -0.1556 | -0.1538 |
| 4STYR  | R1 | 814 | 11.158 | 7.214 | 3.831 | 0.2307 | -0.1610 | -0.1321 |
| 4STYR  | R2 | 815 | 10.960 | 7.079 | 3.954 | 0.2343 | -0.1721 | -0.1387 |
| 4STYR  | R3 | 816 | 11.201 | 6.963 | 3.920 | 0.2399 | -0.1608 | -0.1360 |
| 5STYR  | B  | 817 | 11.258 | 7.627 | 4.003 | 0.2028 | -0.1513 | -0.1615 |
| 5STYR  | R1 | 818 | 11.360 | 7.390 | 4.079 | 0.2068 | -0.1381 | -0.1296 |
| 5STYR  | R2 | 819 | 11.337 | 7.202 | 4.272 | 0.1991 | -0.1347 | -0.1272 |
| 5STYR  | R3 | 820 | 11.578 | 7.251 | 4.160 | 0.2082 | -0.1193 | -0.1009 |
| 6STYR  | B  | 821 | 11.129 | 7.816 | 4.065 | 0.1771 | -0.1530 | -0.1715 |
| 6STYR  | R1 | 822 | 11.006 | 7.636 | 3.913 | 0.2033 | -0.1619 | -0.1644 |
| 6STYR  | R2 | 823 | 10.853 | 7.621 | 3.691 | 0.2294 | -0.1706 | -0.1819 |
| 6STYR  | R3 | 824 | 10.791 | 7.473 | 3.908 | 0.2237 | -0.1880 | -0.1954 |
| 7STYR  | B  | 825 | 11.077 | 7.960 | 4.243 | 0.1567 | -0.1407 | -0.1723 |
| 7STYR  | R1 | 826 | 11.057 | 7.695 | 4.287 | 0.1608 | -0.1484 | -0.1732 |
| 7STYR  | R2 | 827 | 10.884 | 7.497 | 4.349 | 0.1562 | -0.1412 | -0.1628 |
| 7STYR  | R3 | 828 | 11.123 | 7.512 | 4.474 | 0.1540 | -0.1364 | -0.1591 |
| 8STYR  | B  | 829 | 10.939 | 8.126 | 4.332 | 0.1394 | -0.1580 | -0.1891 |
| 8STYR  | R1 | 830 | 10.828 | 7.955 | 4.159 | 0.1563 | -0.1676 | -0.2204 |
| 8STYR  | R2 | 831 | 10.625 | 7.778 | 4.144 | 0.1562 | -0.1670 | -0.2256 |
| 8STYR  | R3 | 832 | 10.673 | 7.945 | 3.938 | 0.1806 | -0.1876 | -0.2367 |
| 9STYR  | B  | 833 | 10.839 | 8.333 | 4.318 | 0.1233 | -0.1798 | -0.2210 |
| 9STYR  | R1 | 834 | 11.062 | 8.288 | 4.172 | 0.1331 | -0.1504 | -0.1858 |
| 9STYR  | R2 | 835 | 11.298 | 8.407 | 4.116 | 0.1323 | -0.1384 | -0.1642 |
| 9STYR  | R3 | 836 | 11.164 | 8.275 | 3.922 | 0.1690 | -0.1668 | -0.1704 |
| 10STYR | B  | 837 | 10.664 | 8.486 | 4.335 | 0.1097 | -0.1660 | -0.2534 |
| 10STYR | R1 | 838 | 10.585 | 8.243 | 4.347 | 0.1121 | -0.1840 | -0.2552 |
| 10STYR | R2 | 839 | 10.459 | 8.048 | 4.486 | 0.1150 | -0.1959 | -0.2692 |
| 10STYR | R3 | 840 | 10.383 | 8.104 | 4.233 | 0.1299 | -0.1949 | -0.2735 |
| 11STYR | B  | 841 | 10.601 | 8.686 | 4.231 | 0.1165 | -0.1666 | -0.2560 |
| 11STYR | R1 | 842 | 10.634 | 8.482 | 4.073 | 0.1367 | -0.1826 | -0.2497 |
| 11STYR | R2 | 843 | 10.496 | 8.337 | 3.891 | 0.1788 | -0.2093 | -0.2604 |
| 11STYR | R3 | 844 | 10.758 | 8.391 | 3.851 | 0.1751 | -0.1705 | -0.2333 |
| 12STYR | B  | 845 | 10.437 | 8.764 | 4.081 | 0.1231 | -0.1946 | -0.2778 |
| 12STYR | R1 | 846 | 10.354 | 8.642 | 4.309 | 0.1053 | -0.1989 | -0.3019 |
| 12STYR | R2 | 847 | 10.188 | 8.675 | 4.520 | 0.0746 | -0.1828 | -0.3283 |
| 12STYR | R3 | 848 | 10.175 | 8.450 | 4.372 | 0.1043 | -0.1993 | -0.3060 |
| 13STYR | B  | 849 | 10.417 | 8.916 | 3.906 | 0.1294 | -0.2032 | -0.3077 |
| 13STYR | R1 | 850 | 10.240 | 8.727 | 3.901 | 0.1541 | -0.2274 | -0.2979 |
| 13STYR | R2 | 851 | 9.971  | 8.724 | 3.877 | 0.1574 | -0.2349 | -0.3356 |
| 13STYR | R3 | 852 | 10.119 | 8.530 | 3.761 | 0.1780 | -0.2400 | -0.3009 |
| 14STYR | B  | 853 | 10.354 | 8.983 | 3.693 | 0.1488 | -0.2027 | -0.3087 |
| 14STYR | R1 | 854 | 10.307 | 9.147 | 3.903 | 0.1186 | -0.2111 | -0.3221 |
| 14STYR | R2 | 855 | 10.094 | 9.299 | 3.968 | 0.0959 | -0.2294 | -0.3539 |
| 14STYR | R3 | 856 | 10.344 | 9.389 | 4.017 | 0.0812 | -0.2027 | -0.3280 |

|        |    |     |        |       |       |         |         |         |
|--------|----|-----|--------|-------|-------|---------|---------|---------|
| 15STYR | B  | 857 | 10.408 | 9.083 | 3.472 | 0.1711  | -0.2422 | -0.3001 |
| 15STYR | R1 | 858 | 10.146 | 9.036 | 3.540 | 0.1716  | -0.2241 | -0.3308 |
| 15STYR | R2 | 859 | 9.918  | 8.913 | 3.463 | 0.1937  | -0.2506 | -0.3542 |
| 15STYR | R3 | 860 | 9.909  | 9.164 | 3.563 | 0.1559  | -0.2458 | -0.3692 |
| 16STYR | B  | 861 | 10.631 | 9.226 | 3.474 | 0.1650  | -0.1983 | -0.2941 |
| 16STYR | R1 | 862 | 10.660 | 8.959 | 3.519 | 0.1820  | -0.1939 | -0.2796 |
| 16STYR | R2 | 863 | 10.835 | 8.773 | 3.430 | 0.1857  | -0.2084 | -0.2424 |
| 16STYR | R3 | 864 | 10.777 | 8.789 | 3.693 | 0.1636  | -0.1755 | -0.2492 |
| 17STYR | B  | 865 | 10.703 | 9.261 | 3.716 | 0.1297  | -0.1910 | -0.2746 |
| 17STYR | R1 | 866 | 10.504 | 9.416 | 3.608 | 0.1361  | -0.1965 | -0.3063 |
| 17STYR | R2 | 867 | 10.247 | 9.499 | 3.615 | 0.1271  | -0.2203 | -0.3540 |
| 17STYR | R3 | 868 | 10.447 | 9.680 | 3.621 | 0.1089  | -0.2002 | -0.3469 |
| 18STYR | B  | 869 | 10.889 | 9.191 | 3.843 | 0.1173  | -0.1910 | -0.2513 |
| 18STYR | R1 | 870 | 10.783 | 9.422 | 3.916 | 0.1085  | -0.1777 | -0.2784 |
| 18STYR | R2 | 871 | 10.792 | 9.692 | 3.923 | 0.0779  | -0.1765 | -0.2858 |
| 18STYR | R3 | 872 | 10.715 | 9.553 | 4.141 | 0.0559  | -0.1776 | -0.2943 |
| 19STYR | B  | 873 | 10.900 | 9.119 | 4.069 | 0.0961  | -0.1560 | -0.2466 |
| 19STYR | R1 | 874 | 11.072 | 9.001 | 3.914 | 0.1276  | -0.1632 | -0.2343 |
| 19STYR | R2 | 875 | 11.163 | 8.752 | 3.863 | 0.1397  | -0.1614 | -0.2219 |
| 19STYR | R3 | 876 | 11.337 | 8.957 | 3.893 | 0.1324  | -0.1608 | -0.1824 |
| 20STYR | B  | 877 | 10.789 | 9.115 | 4.274 | 0.0806  | -0.1551 | -0.2399 |
| 20STYR | R1 | 878 | 11.025 | 9.240 | 4.260 | 0.0719  | -0.1225 | -0.2393 |
| 20STYR | R2 | 879 | 11.117 | 9.473 | 4.360 | 0.0591  | -0.1225 | -0.2275 |
| 20STYR | R3 | 880 | 11.276 | 9.255 | 4.356 | 0.0639  | -0.1190 | -0.2189 |
| 21STYR | B  | 881 | 10.544 | 9.129 | 4.330 | 0.0517  | -0.1710 | -0.3061 |
| 21STYR | R1 | 882 | 10.699 | 9.273 | 4.491 | 0.0634  | -0.1628 | -0.2867 |
| 21STYR | R2 | 883 | 10.730 | 9.527 | 4.577 | 0.0319  | -0.1598 | -0.2840 |
| 21STYR | R3 | 884 | 10.727 | 9.324 | 4.754 | -0.0295 | -0.1540 | -0.2780 |
| 22STYR | B  | 885 | 10.481 | 9.009 | 4.544 | 0.0575  | -0.1784 | -0.2995 |
| 22STYR | R1 | 886 | 10.281 | 9.082 | 4.371 | 0.0613  | -0.1881 | -0.3088 |
| 22STYR | R2 | 887 | 10.065 | 8.979 | 4.245 | 0.0911  | -0.1981 | -0.3519 |
| 22STYR | R3 | 888 | 10.042 | 9.207 | 4.387 | 0.0509  | -0.2018 | -0.3523 |
| 23STYR | B  | 889 | 10.613 | 8.838 | 4.654 | 0.0457  | -0.1558 | -0.2710 |
| 23STYR | R1 | 890 | 10.458 | 8.976 | 4.811 | 0.0180  | -0.1695 | -0.2980 |
| 23STYR | R2 | 891 | 10.464 | 9.114 | 5.043 | -0.0193 | -0.1451 | -0.3114 |
| 23STYR | R3 | 892 | 10.276 | 8.924 | 5.004 | -0.0064 | -0.1566 | -0.3175 |
| 24STYR | B  | 893 | 10.788 | 8.696 | 4.688 | 0.0492  | -0.1515 | -0.2449 |
| 24STYR | R1 | 894 | 10.564 | 8.601 | 4.760 | 0.0716  | -0.1614 | -0.2729 |
| 24STYR | R2 | 895 | 10.404 | 8.384 | 4.745 | 0.0773  | -0.1662 | -0.2650 |
| 24STYR | R3 | 896 | 10.452 | 8.500 | 4.984 | 0.0379  | -0.1289 | -0.2749 |
| 25STYR | B  | 897 | 11.004 | 8.635 | 4.744 | 0.0594  | -0.1175 | -0.2214 |
| 25STYR | R1 | 898 | 10.872 | 8.793 | 4.911 | 0.0106  | -0.1265 | -0.2384 |
| 25STYR | R2 | 899 | 10.779 | 8.813 | 5.164 | -0.0120 | -0.1279 | -0.2466 |
| 25STYR | R3 | 900 | 10.898 | 9.025 | 5.047 | -0.0123 | -0.1236 | -0.2390 |
| 26STYR | B  | 901 | 11.187 | 8.508 | 4.716 | 0.0585  | -0.1148 | -0.1817 |
| 26STYR | R1 | 902 | 10.958 | 8.398 | 4.800 | 0.0611  | -0.1341 | -0.2192 |
| 26STYR | R2 | 903 | 10.786 | 8.196 | 4.753 | 0.0743  | -0.1430 | -0.2293 |
| 26STYR | R3 | 904 | 10.837 | 8.273 | 5.006 | 0.0303  | -0.1186 | -0.2277 |
| 27STYR | B  | 905 | 11.287 | 8.354 | 4.555 | 0.0758  | -0.1197 | -0.1802 |
| 27STYR | R1 | 906 | 11.199 | 8.612 | 4.472 | 0.0977  | -0.1414 | -0.2090 |
| 27STYR | R2 | 907 | 11.042 | 8.732 | 4.288 | 0.1047  | -0.1358 | -0.2113 |
| 27STYR | R3 | 908 | 11.294 | 8.820 | 4.329 | 0.0961  | -0.1237 | -0.1845 |
| 28STYR | B  | 909 | 11.462 | 8.197 | 4.549 | 0.0922  | -0.1149 | -0.1692 |
| 28STYR | R1 | 910 | 11.252 | 8.114 | 4.675 | 0.0693  | -0.1319 | -0.1792 |
| 28STYR | R2 | 911 | 11.176 | 8.020 | 4.917 | 0.0590  | -0.1183 | -0.1771 |
| 28STYR | R3 | 912 | 11.094 | 7.896 | 4.691 | 0.0862  | -0.1436 | -0.1731 |
| 29STYR | B  | 913 | 11.671 | 8.104 | 4.583 | 0.0975  | -0.0878 | -0.1303 |
| 29STYR | R1 | 914 | 11.589 | 8.146 | 4.328 | 0.1156  | -0.1044 | -0.1224 |
| 29STYR | R2 | 915 | 11.700 | 8.245 | 4.103 | 0.1364  | -0.1207 | -0.1192 |
| 29STYR | R3 | 916 | 11.531 | 8.035 | 4.089 | 0.1713  | -0.1491 | -0.1154 |
| 30STYR | B  | 917 | 11.841 | 7.929 | 4.548 | 0.1149  | -0.0949 | -0.0831 |
| 30STYR | R1 | 918 | 11.649 | 7.906 | 4.750 | 0.0957  | -0.0958 | -0.0998 |
| 30STYR | R2 | 919 | 11.609 | 7.873 | 5.015 | 0.0666  | -0.0799 | -0.1022 |
| 30STYR | R3 | 920 | 11.474 | 7.720 | 4.838 | 0.1063  | -0.1094 | -0.1073 |
| 31STYR | B  | 921 | 11.939 | 7.862 | 4.332 | 0.1376  | -0.1109 | -0.0742 |
| 31STYR | R1 | 922 | 12.098 | 7.828 | 4.531 | 0.1214  | -0.0719 | -0.0568 |
| 31STYR | R2 | 923 | 12.264 | 7.628 | 4.603 | 0.1262  | -0.0612 | -0.0377 |
| 31STYR | R3 | 924 | 12.345 | 7.885 | 4.624 | 0.1025  | -0.0553 | -0.0162 |
| 32STYR | B  | 925 | 11.885 | 7.763 | 4.130 | 0.1611  | -0.1148 | -0.0623 |
| 32STYR | R1 | 926 | 11.715 | 7.723 | 4.328 | 0.1505  | -0.0987 | -0.0778 |
| 32STYR | R2 | 927 | 11.594 | 7.531 | 4.474 | 0.1434  | -0.1072 | -0.0950 |
| 32STYR | R3 | 928 | 11.455 | 7.748 | 4.395 | 0.1404  | -0.1149 | -0.1109 |
| 33STYR | B  | 929 | 11.743 | 7.631 | 4.004 | 0.1926  | -0.1352 | -0.0967 |

|        |    |      |        |       |       |         |         |         |
|--------|----|------|--------|-------|-------|---------|---------|---------|
| 33STYR | R1 | 930  | 11.936 | 7.518 | 4.156 | 0.1895  | -0.0864 | -0.0558 |
| 33STYR | R2 | 931  | 11.983 | 7.351 | 4.363 | 0.1592  | -0.0773 | -0.0416 |
| 33STYR | R3 | 932  | 12.140 | 7.341 | 4.144 | 0.1831  | -0.0961 | -0.0237 |
| 34STYR | B  | 933  | 11.648 | 7.615 | 3.793 | 0.2314  | -0.1532 | -0.0956 |
| 34STYR | R1 | 934  | 11.905 | 7.620 | 3.800 | 0.2274  | -0.1211 | -0.0663 |
| 34STYR | R2 | 935  | 12.123 | 7.747 | 3.704 | 0.2292  | -0.1113 | -0.0490 |
| 34STYR | R3 | 936  | 12.118 | 7.477 | 3.716 | 0.2554  | -0.1103 | -0.0138 |
| 35STYR | B  | 937  | 11.667 | 7.587 | 3.562 | 0.2637  | -0.1370 | -0.0817 |
| 35STYR | R1 | 938  | 11.681 | 7.369 | 3.728 | 0.2468  | -0.1346 | -0.0909 |
| 35STYR | R2 | 939  | 11.579 | 7.121 | 3.754 | 0.2618  | -0.1403 | -0.0868 |
| 35STYR | R3 | 940  | 11.841 | 7.164 | 3.800 | 0.2515  | -0.1169 | -0.0507 |
| 36STYR | B  | 941  | 11.673 | 7.741 | 3.378 | 0.2633  | -0.1565 | -0.0913 |
| 36STYR | R1 | 942  | 11.477 | 7.778 | 3.562 | 0.2391  | -0.1614 | -0.1181 |
| 36STYR | R2 | 943  | 11.374 | 7.975 | 3.714 | 0.2057  | -0.1662 | -0.1345 |
| 36STYR | R3 | 944  | 11.210 | 7.813 | 3.573 | 0.2363  | -0.1649 | -0.1718 |
| 37STYR | B  | 945  | 11.838 | 7.873 | 3.252 | 0.2685  | -0.1316 | -0.0896 |
| 37STYR | R1 | 946  | 11.676 | 7.682 | 3.120 | 0.3083  | -0.1375 | -0.1012 |
| 37STYR | R2 | 947  | 11.700 | 7.464 | 2.963 | 0.3200  | -0.1668 | -0.0591 |
| 37STYR | R3 | 948  | 11.527 | 7.660 | 2.896 | 0.3325  | -0.1742 | -0.1139 |
| 38STYR | B  | 949  | 12.045 | 7.996 | 3.293 | 0.2517  | -0.1355 | -0.0719 |
| 38STYR | R1 | 950  | 11.848 | 8.026 | 3.475 | 0.2341  | -0.1289 | -0.0848 |
| 38STYR | R2 | 951  | 11.815 | 8.031 | 3.743 | 0.2200  | -0.1218 | -0.0867 |
| 38STYR | R3 | 952  | 11.692 | 8.214 | 3.588 | 0.2063  | -0.1425 | -0.1004 |
| 39STYR | B  | 953  | 12.287 | 7.950 | 3.362 | 0.2405  | -0.1160 | -0.0516 |
| 39STYR | R1 | 954  | 12.127 | 7.747 | 3.245 | 0.2935  | -0.1297 | -0.0603 |
| 39STYR | R2 | 955  | 12.061 | 7.489 | 3.288 | 0.2836  | -0.1215 | -0.0256 |
| 39STYR | R3 | 956  | 12.124 | 7.573 | 3.039 | 0.3126  | -0.1631 | -0.0324 |
| 40STYR | B  | 957  | 12.416 | 8.059 | 3.554 | 0.2353  | -0.0936 | -0.0257 |
| 40STYR | R1 | 958  | 12.281 | 8.218 | 3.368 | 0.2413  | -0.1279 | -0.0501 |
| 40STYR | R2 | 959  | 12.115 | 8.431 | 3.361 | 0.2440  | -0.1258 | -0.0490 |
| 40STYR | R3 | 960  | 12.325 | 8.417 | 3.192 | 0.2376  | -0.1326 | -0.0563 |
| 41STYR | B  | 961  | 12.451 | 8.282 | 3.650 | 0.2012  | -0.0872 | -0.0409 |
| 41STYR | R1 | 962  | 12.363 | 8.098 | 3.818 | 0.1886  | -0.0798 | -0.0318 |
| 41STYR | R2 | 963  | 12.167 | 8.071 | 4.002 | 0.1706  | -0.0822 | -0.0513 |
| 41STYR | R3 | 964  | 12.424 | 8.023 | 4.070 | 0.1661  | -0.0643 | -0.0217 |
| 42STYR | B  | 965  | 12.527 | 8.509 | 3.620 | 0.2007  | -0.1020 | -0.0388 |
| 42STYR | R1 | 966  | 12.485 | 8.433 | 3.870 | 0.1664  | -0.0944 | -0.0355 |
| 42STYR | R2 | 967  | 12.600 | 8.421 | 4.114 | 0.1405  | -0.0788 | -0.0224 |
| 42STYR | R3 | 968  | 12.352 | 8.525 | 4.087 | 0.1392  | -0.0902 | -0.0539 |
| 43STYR | B  | 969  | 12.594 | 8.675 | 3.459 | 0.1947  | -0.0998 | -0.0595 |
| 43STYR | R1 | 970  | 12.694 | 8.423 | 3.440 | 0.2286  | -0.0787 | -0.0056 |
| 43STYR | R2 | 971  | 12.716 | 8.232 | 3.251 | 0.2428  | -0.0886 | 0.0059  |
| 43STYR | R3 | 972  | 12.926 | 8.287 | 3.412 | 0.2257  | -0.0912 | 0.0294  |
| 44STYR | B  | 973  | 12.706 | 8.886 | 3.448 | 0.1881  | -0.0667 | -0.0355 |
| 44STYR | R1 | 974  | 12.648 | 8.800 | 3.215 | 0.2204  | -0.0851 | -0.0261 |
| 44STYR | R2 | 975  | 12.769 | 8.744 | 2.981 | 0.2415  | -0.1120 | -0.0089 |
| 44STYR | R3 | 976  | 12.560 | 8.915 | 2.987 | 0.2541  | -0.0952 | -0.0442 |
| 45STYR | B  | 977  | 12.649 | 9.117 | 3.498 | 0.1795  | -0.0815 | -0.0412 |
| 45STYR | R1 | 978  | 12.860 | 9.077 | 3.342 | 0.1942  | -0.0778 | -0.0144 |
| 45STYR | R2 | 979  | 12.948 | 9.162 | 3.101 | 0.2169  | -0.0888 | -0.0100 |
| 45STYR | R3 | 980  | 13.124 | 9.108 | 3.299 | 0.1971  | -0.0633 | 0.0145  |
| 46STYR | B  | 981  | 12.435 | 9.173 | 3.597 | 0.1907  | -0.0891 | -0.0913 |
| 46STYR | R1 | 982  | 12.597 | 9.055 | 3.751 | 0.1265  | -0.0831 | -0.0425 |
| 46STYR | R2 | 983  | 12.694 | 9.080 | 4.001 | 0.1099  | -0.0514 | -0.0392 |
| 46STYR | R3 | 984  | 12.604 | 8.841 | 3.915 | 0.1533  | -0.0718 | -0.0287 |
| 47STYR | B  | 985  | 12.268 | 9.027 | 3.679 | 0.1601  | -0.1132 | -0.0853 |
| 47STYR | R1 | 986  | 12.222 | 9.284 | 3.691 | 0.1436  | -0.1053 | -0.0940 |
| 47STYR | R2 | 987  | 12.036 | 9.465 | 3.616 | 0.1414  | -0.1234 | -0.1322 |
| 47STYR | R3 | 988  | 12.134 | 9.468 | 3.868 | 0.0945  | -0.1096 | -0.1139 |
| 48STYR | B  | 989  | 12.208 | 8.808 | 3.714 | 0.1605  | -0.1147 | -0.0880 |
| 48STYR | R1 | 990  | 12.165 | 8.886 | 3.477 | 0.1820  | -0.1164 | -0.0949 |
| 48STYR | R2 | 991  | 11.961 | 8.886 | 3.300 | 0.1936  | -0.1457 | -0.1082 |
| 48STYR | R3 | 992  | 12.212 | 8.829 | 3.217 | 0.2035  | -0.1316 | -0.0876 |
| 49STYR | B  | 993  | 12.031 | 8.651 | 3.730 | 0.1594  | -0.1126 | -0.0893 |
| 49STYR | R1 | 994  | 11.993 | 8.910 | 3.810 | 0.1488  | -0.1228 | -0.1049 |
| 49STYR | R2 | 995  | 11.819 | 9.115 | 3.783 | 0.1502  | -0.1260 | -0.1383 |
| 49STYR | R3 | 996  | 11.914 | 9.050 | 4.027 | 0.1152  | -0.1153 | -0.1218 |
| 50STYR | B  | 997  | 12.019 | 8.430 | 3.806 | 0.1807  | -0.1037 | -0.0913 |
| 50STYR | R1 | 998  | 11.800 | 8.574 | 3.825 | 0.1662  | -0.1046 | -0.1181 |
| 50STYR | R2 | 999  | 11.535 | 8.549 | 3.782 | 0.1746  | -0.1386 | -0.1514 |
| 50STYR | R3 | 1000 | 11.625 | 8.683 | 3.998 | 0.1303  | -0.1374 | -0.1336 |
| 1STYR  | B  | 1001 | 13.871 | 9.699 | 7.894 | -0.3801 | 0.1807  | 0.0938  |
| 1STYR  | R1 | 1002 | 13.784 | 9.792 | 8.133 | -0.4215 | 0.2019  | 0.0543  |

|        |    |      |        |        |       |         |        |        |
|--------|----|------|--------|--------|-------|---------|--------|--------|
| 1STYR  | R2 | 1003 | 13.637 | 9.997  | 8.229 | -0.4461 | 0.1946 | 0.0323 |
| 1STYR  | R3 | 1004 | 13.586 | 9.745  | 8.312 | -0.4189 | 0.1968 | 0.0559 |
| 2STYR  | B  | 1005 | 13.959 | 9.764  | 7.693 | -0.3537 | 0.1834 | 0.0721 |
| 2STYR  | R1 | 1006 | 13.801 | 9.549  | 7.694 | -0.3530 | 0.1832 | 0.0805 |
| 2STYR  | R2 | 1007 | 13.573 | 9.449  | 7.589 | -0.3353 | 0.1592 | 0.0649 |
| 2STYR  | R3 | 1008 | 13.791 | 9.291  | 7.615 | -0.3220 | 0.1807 | 0.0844 |
| 3STYR  | B  | 1009 | 14.032 | 9.970  | 7.591 | -0.3557 | 0.1750 | 0.0767 |
| 3STYR  | R1 | 1010 | 14.218 | 9.791  | 7.609 | -0.3479 | 0.2069 | 0.1157 |
| 3STYR  | R2 | 1011 | 14.460 | 9.729  | 7.711 | -0.3598 | 0.2114 | 0.1469 |
| 3STYR  | R3 | 1012 | 14.413 | 9.696  | 7.448 | -0.3249 | 0.2116 | 0.1405 |
| 4STYR  | B  | 1013 | 14.109 | 10.039 | 7.381 | -0.3231 | 0.1602 | 0.0813 |
| 4STYR  | R1 | 1014 | 14.116 | 10.221 | 7.574 | -0.3856 | 0.1889 | 0.0661 |
| 4STYR  | R2 | 1015 | 14.029 | 10.472 | 7.621 | -0.3862 | 0.1897 | 0.0609 |
| 4STYR  | R3 | 1016 | 14.282 | 10.403 | 7.684 | -0.3891 | 0.1886 | 0.0720 |
| 5STYR  | B  | 1017 | 14.182 | 9.974  | 7.168 | -0.3340 | 0.1698 | 0.0928 |
| 5STYR  | R1 | 1018 | 14.172 | 10.235 | 7.225 | -0.3307 | 0.1762 | 0.0638 |
| 5STYR  | R2 | 1019 | 14.322 | 10.459 | 7.250 | -0.3446 | 0.1829 | 0.0873 |
| 5STYR  | R3 | 1020 | 14.068 | 10.476 | 7.160 | -0.3348 | 0.1728 | 0.0580 |
| 6STYR  | B  | 1021 | 14.366 | 9.905  | 7.046 | -0.3105 | 0.1702 | 0.1313 |
| 6STYR  | R1 | 1022 | 14.142 | 9.826  | 6.951 | -0.2748 | 0.1599 | 0.0988 |
| 6STYR  | R2 | 1023 | 14.029 | 9.594  | 6.870 | -0.2399 | 0.1428 | 0.0989 |
| 6STYR  | R3 | 1024 | 13.991 | 9.820  | 6.727 | -0.2371 | 0.1275 | 0.0742 |
| 7STYR  | B  | 1025 | 14.576 | 9.835  | 6.966 | -0.2884 | 0.1978 | 0.1547 |
| 7STYR  | R1 | 1026 | 14.469 | 10.085 | 6.900 | -0.2728 | 0.1695 | 0.1058 |
| 7STYR  | R2 | 1027 | 14.524 | 10.349 | 6.896 | -0.2897 | 0.1734 | 0.1254 |
| 7STYR  | R3 | 1028 | 14.360 | 10.243 | 6.710 | -0.2672 | 0.1732 | 0.1056 |
| 8STYR  | B  | 1029 | 14.715 | 9.645  | 7.041 | -0.2836 | 0.1879 | 0.1810 |
| 8STYR  | R1 | 1030 | 14.571 | 9.610  | 6.819 | -0.2410 | 0.1680 | 0.1544 |
| 8STYR  | R2 | 1031 | 14.389 | 9.431  | 6.730 | -0.2251 | 0.1595 | 0.1389 |
| 8STYR  | R3 | 1032 | 14.590 | 9.512  | 6.568 | -0.2133 | 0.1665 | 0.1569 |
| 9STYR  | B  | 1033 | 14.793 | 9.426  | 6.977 | -0.2465 | 0.2024 | 0.1964 |
| 9STYR  | R1 | 1034 | 14.657 | 9.431  | 7.199 | -0.2866 | 0.2150 | 0.1638 |
| 9STYR  | R2 | 1035 | 14.436 | 9.301  | 7.283 | -0.2899 | 0.2048 | 0.1395 |
| 9STYR  | R3 | 1036 | 14.641 | 9.341  | 7.453 | -0.3156 | 0.2255 | 0.1658 |
| 10STYR | B  | 1037 | 14.843 | 9.205  | 7.059 | -0.2588 | 0.1958 | 0.2091 |
| 10STYR | R1 | 1038 | 14.790 | 9.220  | 6.795 | -0.2043 | 0.1857 | 0.1910 |
| 10STYR | R2 | 1039 | 14.889 | 9.206  | 6.545 | -0.1930 | 0.1756 | 0.1960 |
| 10STYR | R3 | 1040 | 14.645 | 9.104  | 6.599 | -0.1967 | 0.1801 | 0.1885 |
| 11STYR | B  | 1041 | 15.019 | 9.060  | 7.138 | -0.2415 | 0.1976 | 0.2202 |
| 11STYR | R1 | 1042 | 14.789 | 8.992  | 7.226 | -0.2590 | 0.2023 | 0.2157 |
| 11STYR | R2 | 1043 | 14.692 | 8.922  | 7.468 | -0.2893 | 0.1975 | 0.2022 |
| 11STYR | R3 | 1044 | 14.636 | 8.771  | 7.251 | -0.2487 | 0.1928 | 0.1948 |
| 12STYR | B  | 1045 | 15.167 | 8.918  | 7.047 | -0.2256 | 0.2067 | 0.2510 |
| 12STYR | R1 | 1046 | 15.188 | 9.166  | 6.969 | -0.2481 | 0.2282 | 0.2491 |
| 12STYR | R2 | 1047 | 15.388 | 9.348  | 6.967 | -0.2463 | 0.2264 | 0.2583 |
| 12STYR | R3 | 1048 | 15.212 | 9.337  | 6.762 | -0.2350 | 0.2258 | 0.2486 |
| 13STYR | B  | 1049 | 15.280 | 8.729  | 7.003 | -0.2182 | 0.2645 | 0.2853 |
| 13STYR | R1 | 1050 | 15.392 | 8.909  | 7.166 | -0.2429 | 0.2198 | 0.2973 |
| 13STYR | R2 | 1051 | 15.528 | 8.919  | 7.399 | -0.2694 | 0.2518 | 0.3115 |
| 13STYR | R3 | 1052 | 15.602 | 9.076  | 7.192 | -0.2610 | 0.2413 | 0.3065 |
| 14STYR | B  | 1053 | 15.331 | 8.557  | 6.856 | -0.1896 | 0.2182 | 0.2970 |
| 14STYR | R1 | 1054 | 15.223 | 8.771  | 6.749 | -0.1972 | 0.2081 | 0.2780 |
| 14STYR | R2 | 1055 | 15.035 | 8.814  | 6.560 | -0.1761 | 0.1829 | 0.2513 |
| 14STYR | R3 | 1056 | 15.258 | 8.966  | 6.566 | -0.1831 | 0.1925 | 0.2641 |
| 15STYR | B  | 1057 | 15.459 | 8.374  | 6.763 | -0.1521 | 0.2341 | 0.3146 |
| 15STYR | R1 | 1058 | 15.188 | 8.378  | 6.726 | -0.1657 | 0.2289 | 0.2810 |
| 15STYR | R2 | 1059 | 14.963 | 8.232  | 6.751 | -0.1492 | 0.2041 | 0.2850 |
| 15STYR | R3 | 1060 | 15.003 | 8.380  | 6.529 | -0.1484 | 0.1725 | 0.2639 |
| 16STYR | B  | 1061 | 15.688 | 8.389  | 6.699 | -0.1673 | 0.2287 | 0.3439 |
| 16STYR | R1 | 1062 | 15.628 | 8.425  | 6.961 | -0.2065 | 0.2624 | 0.3376 |
| 16STYR | R2 | 1063 | 15.677 | 8.337  | 7.211 | -0.2176 | 0.2668 | 0.3414 |
| 16STYR | R3 | 1064 | 15.678 | 8.602  | 7.158 | -0.2390 | 0.2670 | 0.3418 |
| 17STYR | B  | 1065 | 15.891 | 8.492  | 6.717 | -0.1663 | 0.2404 | 0.3564 |
| 17STYR | R1 | 1066 | 15.877 | 8.278  | 6.563 | -0.1187 | 0.2455 | 0.3637 |
| 17STYR | R2 | 1067 | 15.929 | 8.190  | 6.313 | -0.1112 | 0.2373 | 0.3682 |
| 17STYR | R3 | 1068 | 15.981 | 8.032  | 6.526 | -0.1224 | 0.2423 | 0.3747 |
| 18STYR | B  | 1069 | 16.049 | 8.660  | 6.752 | -0.1762 | 0.2635 | 0.3890 |
| 18STYR | R1 | 1070 | 15.807 | 8.740  | 6.696 | -0.1950 | 0.2263 | 0.3282 |
| 18STYR | R2 | 1071 | 15.680 | 8.913  | 6.532 | -0.1685 | 0.2495 | 0.3320 |
| 18STYR | R3 | 1072 | 15.618 | 8.906  | 6.795 | -0.1970 | 0.2262 | 0.3248 |
| 19STYR | B  | 1073 | 16.280 | 8.678  | 6.812 | -0.1886 | 0.2886 | 0.4006 |
| 19STYR | R1 | 1074 | 16.131 | 8.487  | 6.933 | -0.1756 | 0.2760 | 0.3881 |
| 19STYR | R2 | 1075 | 16.091 | 8.404  | 7.187 | -0.2287 | 0.2922 | 0.3851 |

|        |    |      |        |        |       |         |        |        |
|--------|----|------|--------|--------|-------|---------|--------|--------|
| 19STYR | R3 | 1076 | 16.123 | 8.223  | 6.990 | -0.1884 | 0.2796 | 0.4032 |
| 20STYR | B  | 1077 | 16.426 | 8.842  | 6.890 | -0.2019 | 0.2885 | 0.4062 |
| 20STYR | R1 | 1078 | 16.534 | 8.630  | 6.776 | -0.1920 | 0.3006 | 0.4211 |
| 20STYR | R2 | 1079 | 16.718 | 8.441  | 6.831 | -0.1973 | 0.3050 | 0.4543 |
| 20STYR | R3 | 1080 | 16.695 | 8.538  | 6.580 | -0.1436 | 0.3160 | 0.4535 |
| 21STYR | B  | 1081 | 16.445 | 9.040  | 7.011 | -0.2368 | 0.2887 | 0.3973 |
| 21STYR | R1 | 1082 | 16.466 | 8.819  | 7.147 | -0.2346 | 0.3091 | 0.4195 |
| 21STYR | R2 | 1083 | 16.365 | 8.692  | 7.363 | -0.2546 | 0.2918 | 0.3999 |
| 21STYR | R3 | 1084 | 16.632 | 8.702  | 7.325 | -0.2496 | 0.3229 | 0.4425 |
| 22STYR | B  | 1085 | 16.388 | 9.135  | 7.219 | -0.2663 | 0.3108 | 0.3710 |
| 22STYR | R1 | 1086 | 16.200 | 9.017  | 7.089 | -0.2302 | 0.2844 | 0.3669 |
| 22STYR | R2 | 1087 | 15.952 | 9.049  | 6.988 | -0.2184 | 0.2741 | 0.3342 |
| 22STYR | R3 | 1088 | 16.008 | 8.836  | 7.145 | -0.2352 | 0.2869 | 0.3578 |
| 23STYR | B  | 1089 | 16.208 | 9.172  | 7.369 | -0.2989 | 0.2704 | 0.3580 |
| 23STYR | R1 | 1090 | 16.445 | 9.131  | 7.473 | -0.2931 | 0.3139 | 0.3903 |
| 23STYR | R2 | 1091 | 16.614 | 9.248  | 7.649 | -0.3345 | 0.3347 | 0.4165 |
| 23STYR | R3 | 1092 | 16.558 | 8.985  | 7.670 | -0.3224 | 0.3325 | 0.4209 |
| 24STYR | B  | 1093 | 15.986 | 9.214  | 7.424 | -0.2837 | 0.2868 | 0.3373 |
| 24STYR | R1 | 1094 | 16.144 | 9.273  | 7.614 | -0.3014 | 0.3088 | 0.3441 |
| 24STYR | R2 | 1095 | 16.227 | 9.460  | 7.791 | -0.3531 | 0.3206 | 0.3562 |
| 24STYR | R3 | 1096 | 16.174 | 9.209  | 7.875 | -0.3383 | 0.3154 | 0.3500 |
| 25STYR | B  | 1097 | 15.809 | 9.210  | 7.576 | -0.3152 | 0.2903 | 0.3211 |
| 25STYR | R1 | 1098 | 15.961 | 8.987  | 7.546 | -0.3022 | 0.2774 | 0.3459 |
| 25STYR | R2 | 1099 | 15.932 | 8.720  | 7.524 | -0.2710 | 0.2734 | 0.3540 |
| 25STYR | R3 | 1100 | 16.120 | 8.822  | 7.689 | -0.3060 | 0.3007 | 0.3772 |
| 26STYR | B  | 1101 | 15.583 | 9.302  | 7.585 | -0.3159 | 0.2609 | 0.2907 |
| 26STYR | R1 | 1102 | 15.726 | 9.316  | 7.811 | -0.3517 | 0.2922 | 0.3102 |
| 26STYR | R2 | 1103 | 15.831 | 9.477  | 8.000 | -0.3605 | 0.3007 | 0.3078 |
| 26STYR | R3 | 1104 | 15.701 | 9.252  | 8.072 | -0.3742 | 0.3102 | 0.3125 |
| 27STYR | B  | 1105 | 15.507 | 9.498  | 7.694 | -0.3423 | 0.2665 | 0.2787 |
| 27STYR | R1 | 1106 | 15.323 | 9.379  | 7.528 | -0.3117 | 0.2637 | 0.2394 |
| 27STYR | R2 | 1107 | 15.064 | 9.302  | 7.532 | -0.3040 | 0.2375 | 0.2325 |
| 27STYR | R3 | 1108 | 15.163 | 9.434  | 7.318 | -0.3080 | 0.2352 | 0.2292 |
| 28STYR | B  | 1109 | 15.326 | 9.645  | 7.681 | -0.3483 | 0.2690 | 0.2333 |
| 28STYR | R1 | 1110 | 15.551 | 9.755  | 7.773 | -0.3686 | 0.2861 | 0.2775 |
| 28STYR | R2 | 1111 | 15.664 | 9.887  | 7.980 | -0.3880 | 0.3043 | 0.2765 |
| 28STYR | R3 | 1112 | 15.699 | 9.976  | 7.727 | -0.3808 | 0.2935 | 0.2737 |
| 29STYR | B  | 1113 | 15.269 | 9.850  | 7.755 | -0.3821 | 0.2492 | 0.2288 |
| 29STYR | R1 | 1114 | 15.100 | 9.759  | 7.588 | -0.3402 | 0.2343 | 0.2037 |
| 29STYR | R2 | 1115 | 14.840 | 9.690  | 7.563 | -0.3390 | 0.2383 | 0.1792 |
| 29STYR | R3 | 1116 | 14.961 | 9.831  | 7.367 | -0.3220 | 0.2479 | 0.1966 |
| 30STYR | B  | 1117 | 15.178 | 10.064 | 7.712 | -0.3863 | 0.2718 | 0.1982 |
| 30STYR | R1 | 1118 | 15.209 | 9.971  | 7.975 | -0.4065 | 0.2732 | 0.2155 |
| 30STYR | R2 | 1119 | 15.323 | 10.043 | 8.209 | -0.4369 | 0.2817 | 0.2277 |
| 30STYR | R3 | 1120 | 15.081 | 9.923  | 8.207 | -0.4323 | 0.2727 | 0.2012 |
| 31STYR | B  | 1121 | 14.957 | 10.141 | 7.774 | -0.3797 | 0.2338 | 0.1747 |
| 31STYR | R1 | 1122 | 15.096 | 10.301 | 7.613 | -0.3832 | 0.2438 | 0.1861 |
| 31STYR | R2 | 1123 | 15.175 | 10.559 | 7.601 | -0.3945 | 0.2470 | 0.1780 |
| 31STYR | R3 | 1124 | 15.052 | 10.445 | 7.389 | -0.3690 | 0.2283 | 0.1732 |
| 32STYR | B  | 1125 | 14.768 | 10.037 | 7.878 | -0.3984 | 0.2363 | 0.1685 |
| 32STYR | R1 | 1126 | 14.864 | 10.251 | 8.000 | -0.4219 | 0.2403 | 0.1656 |
| 32STYR | R2 | 1127 | 14.961 | 10.343 | 8.235 | -0.4559 | 0.2650 | 0.1701 |
| 32STYR | R3 | 1128 | 14.785 | 10.492 | 8.094 | -0.4355 | 0.2503 | 0.1288 |
| 33STYR | B  | 1129 | 14.552 | 10.110 | 7.926 | -0.4191 | 0.2406 | 0.1263 |
| 33STYR | R1 | 1130 | 14.637 | 10.133 | 7.674 | -0.3771 | 0.2065 | 0.1433 |
| 33STYR | R2 | 1131 | 14.655 | 10.325 | 7.485 | -0.3742 | 0.2100 | 0.1471 |
| 33STYR | R3 | 1132 | 14.565 | 10.079 | 7.419 | -0.3447 | 0.2024 | 0.1350 |
| 34STYR | B  | 1133 | 14.328 | 10.058 | 7.967 | -0.4149 | 0.2343 | 0.1045 |
| 34STYR | R1 | 1134 | 14.401 | 10.274 | 8.080 | -0.4496 | 0.2270 | 0.1085 |
| 34STYR | R2 | 1135 | 14.378 | 10.388 | 8.324 | -0.4742 | 0.2448 | 0.0979 |
| 34STYR | R3 | 1136 | 14.329 | 10.533 | 8.101 | -0.4458 | 0.2302 | 0.0819 |
| 35STYR | B  | 1137 | 14.211 | 9.889  | 8.064 | -0.4028 | 0.2131 | 0.0877 |
| 35STYR | R1 | 1138 | 14.082 | 10.112 | 8.021 | -0.4257 | 0.1851 | 0.0768 |
| 35STYR | R2 | 1139 | 13.946 | 10.301 | 8.157 | -0.4405 | 0.1886 | 0.0570 |
| 35STYR | R3 | 1140 | 13.853 | 10.212 | 7.919 | -0.4058 | 0.1946 | 0.0412 |
| 36STYR | B  | 1141 | 14.241 | 9.656  | 8.156 | -0.4070 | 0.2152 | 0.0997 |
| 36STYR | R1 | 1142 | 14.187 | 9.878  | 8.318 | -0.4212 | 0.2340 | 0.0960 |
| 36STYR | R2 | 1143 | 14.008 | 9.982  | 8.491 | -0.4542 | 0.2339 | 0.0622 |
| 36STYR | R3 | 1144 | 14.273 | 10.001 | 8.542 | -0.4639 | 0.2314 | 0.1138 |
| 37STYR | B  | 1145 | 14.485 | 9.601  | 8.199 | -0.3976 | 0.2397 | 0.1564 |
| 37STYR | R1 | 1146 | 14.320 | 9.410  | 8.275 | -0.4206 | 0.2297 | 0.1321 |
| 37STYR | R2 | 1147 | 14.280 | 9.258  | 8.495 | -0.4223 | 0.2381 | 0.1375 |
| 37STYR | R3 | 1148 | 14.302 | 9.141  | 8.253 | -0.3778 | 0.2253 | 0.1475 |



|        |    |      |        |        |       |         |         |         |
|--------|----|------|--------|--------|-------|---------|---------|---------|
| 38STYR | B  | 1149 | 14.683 | 9.646  | 8.098 | -0.3982 | 0.2371  | 0.1698  |
| 38STYR | R1 | 1150 | 14.631 | 9.801  | 8.296 | -0.4276 | 0.2578  | 0.1367  |
| 38STYR | R2 | 1151 | 14.723 | 9.878  | 8.537 | -0.4853 | 0.2551  | 0.1599  |
| 38STYR | R3 | 1152 | 14.653 | 10.064 | 8.355 | -0.4564 | 0.2571  | 0.1507  |
| 39STYR | B  | 1153 | 14.879 | 9.605  | 7.978 | -0.3617 | 0.2630  | 0.1889  |
| 39STYR | R1 | 1154 | 14.876 | 9.533  | 8.236 | -0.4050 | 0.2702  | 0.2055  |
| 39STYR | R2 | 1155 | 15.010 | 9.568  | 8.467 | -0.4437 | 0.2879  | 0.2254  |
| 39STYR | R3 | 1156 | 14.929 | 9.321  | 8.394 | -0.3975 | 0.2766  | 0.2117  |
| 40STYR | B  | 1157 | 15.079 | 9.494  | 8.003 | -0.4008 | 0.2523  | 0.2018  |
| 40STYR | R1 | 1158 | 14.859 | 9.350  | 7.959 | -0.3599 | 0.2391  | 0.1997  |
| 40STYR | R2 | 1159 | 14.783 | 9.140  | 7.808 | -0.3438 | 0.2357  | 0.1964  |
| 40STYR | R3 | 1160 | 14.703 | 9.157  | 8.066 | -0.3841 | 0.2493  | 0.1830  |
| 41STYR | B  | 1161 | 15.205 | 9.307  | 7.968 | -0.3680 | 0.2575  | 0.2343  |
| 41STYR | R1 | 1162 | 15.299 | 9.463  | 8.147 | -0.3903 | 0.2646  | 0.2556  |
| 41STYR | R2 | 1163 | 15.400 | 9.413  | 8.392 | -0.4100 | 0.2918  | 0.2694  |
| 41STYR | R3 | 1164 | 15.498 | 9.616  | 8.244 | -0.4213 | 0.2967  | 0.2686  |
| 42STYR | B  | 1165 | 15.293 | 9.116  | 7.876 | -0.3134 | 0.2611  | 0.2761  |
| 42STYR | R1 | 1166 | 15.171 | 9.069  | 8.089 | -0.3651 | 0.2690  | 0.2563  |
| 42STYR | R2 | 1167 | 15.000 | 8.884  | 8.184 | -0.3670 | 0.2679  | 0.2508  |
| 42STYR | R3 | 1168 | 15.217 | 8.954  | 8.328 | -0.3768 | 0.2758  | 0.2618  |
| 43STYR | B  | 1169 | 15.219 | 8.934  | 7.745 | -0.3119 | 0.2487  | 0.2547  |
| 43STYR | R1 | 1170 | 15.450 | 8.918  | 7.881 | -0.3388 | 0.2652  | 0.2944  |
| 43STYR | R2 | 1171 | 15.713 | 8.857  | 7.865 | -0.3317 | 0.2946  | 0.2985  |
| 43STYR | R3 | 1172 | 15.565 | 8.764  | 8.071 | -0.3194 | 0.2963  | 0.3081  |
| 44STYR | B  | 1173 | 15.129 | 8.857  | 7.548 | -0.2772 | 0.2426  | 0.2515  |
| 44STYR | R1 | 1174 | 15.012 | 8.757  | 7.750 | -0.3059 | 0.2564  | 0.2567  |
| 44STYR | R2 | 1175 | 14.762 | 8.706  | 7.837 | -0.3132 | 0.2359  | 0.2239  |
| 44STYR | R3 | 1176 | 14.953 | 8.516  | 7.857 | -0.3038 | 0.2467  | 0.2360  |
| 45STYR | B  | 1177 | 15.072 | 8.668  | 7.418 | -0.2699 | 0.2366  | 0.2664  |
| 45STYR | R1 | 1178 | 15.284 | 8.635  | 7.582 | -0.2790 | 0.2475  | 0.2836  |
| 45STYR | R2 | 1179 | 15.370 | 8.476  | 7.782 | -0.2824 | 0.2662  | 0.2998  |
| 45STYR | R3 | 1180 | 15.541 | 8.551  | 7.587 | -0.2636 | 0.2969  | 0.3279  |
| 46STYR | B  | 1181 | 15.179 | 8.475  | 7.341 | -0.2556 | 0.2155  | 0.2602  |
| 46STYR | R1 | 1182 | 14.925 | 8.449  | 7.394 | -0.2426 | 0.2194  | 0.2401  |
| 46STYR | R2 | 1183 | 14.708 | 8.336  | 7.279 | -0.2272 | 0.2052  | 0.2248  |
| 46STYR | R3 | 1184 | 14.768 | 8.282  | 7.537 | -0.2541 | 0.2262  | 0.2355  |
| 47STYR | B  | 1185 | 15.165 | 8.308  | 7.181 | -0.2263 | 0.2394  | 0.2748  |
| 47STYR | R1 | 1186 | 15.274 | 8.238  | 7.405 | -0.2256 | 0.2548  | 0.3108  |
| 47STYR | R2 | 1187 | 15.231 | 8.056  | 7.600 | -0.2504 | 0.2473  | 0.2984  |
| 47STYR | R3 | 1188 | 15.483 | 8.107  | 7.516 | -0.2381 | 0.2634  | 0.3448  |
| 48STYR | B  | 1189 | 15.283 | 8.130  | 7.089 | -0.2111 | 0.2322  | 0.2897  |
| 48STYR | R1 | 1190 | 15.031 | 8.081  | 7.148 | -0.2001 | 0.2206  | 0.2673  |
| 48STYR | R2 | 1191 | 14.801 | 7.982  | 7.046 | -0.1856 | 0.2009  | 0.2538  |
| 48STYR | R3 | 1192 | 14.880 | 7.912  | 7.295 | -0.2016 | 0.2189  | 0.2639  |
| 49STYR | B  | 1193 | 15.252 | 7.935  | 6.965 | -0.1744 | 0.2350  | 0.3003  |
| 49STYR | R1 | 1194 | 15.500 | 7.989  | 7.038 | -0.1779 | 0.2460  | 0.3364  |
| 49STYR | R2 | 1195 | 15.745 | 8.002  | 6.925 | -0.1644 | 0.2348  | 0.3645  |
| 49STYR | R3 | 1196 | 15.716 | 7.896  | 7.172 | -0.1944 | 0.2559  | 0.3701  |
| 50STYR | B  | 1197 | 15.205 | 7.729  | 6.868 | -0.1443 | 0.2196  | 0.3124  |
| 50STYR | R1 | 1198 | 15.301 | 7.920  | 6.708 | -0.1470 | 0.2043  | 0.3115  |
| 50STYR | R2 | 1199 | 15.253 | 8.028  | 6.465 | -0.1029 | 0.2012  | 0.3014  |
| 50STYR | R3 | 1200 | 15.506 | 7.972  | 6.541 | -0.1144 | 0.2234  | 0.3571  |
| 1STYR  | B  | 1201 | 11.708 | 9.627  | 3.884 | 0.0932  | -0.1221 | -0.1956 |
| 1STYR  | R1 | 1202 | 11.883 | 9.773  | 4.009 | 0.0648  | -0.1018 | -0.1780 |
| 1STYR  | R2 | 1203 | 11.956 | 9.851  | 4.257 | 0.0168  | -0.0844 | -0.1692 |
| 1STYR  | R3 | 1204 | 11.935 | 10.033 | 4.059 | 0.0458  | -0.0969 | -0.1839 |
| 2STYR  | B  | 1205 | 11.612 | 9.629  | 3.684 | 0.1189  | -0.1449 | -0.1834 |
| 2STYR  | R1 | 1206 | 11.455 | 9.564  | 3.872 | 0.0953  | -0.1429 | -0.2124 |
| 2STYR  | R2 | 1207 | 11.294 | 9.365  | 3.958 | 0.1003  | -0.1526 | -0.2252 |
| 2STYR  | R3 | 1208 | 11.206 | 9.620  | 3.962 | 0.0884  | -0.1568 | -0.2226 |
| 3STYR  | B  | 1209 | 11.436 | 9.689  | 3.532 | 0.1415  | -0.1523 | -0.2161 |
| 3STYR  | R1 | 1210 | 11.645 | 9.527  | 3.444 | 0.1554  | -0.1394 | -0.1718 |
| 3STYR  | R2 | 1211 | 11.827 | 9.507  | 3.245 | 0.1681  | -0.1324 | -0.1610 |
| 3STYR  | R3 | 1212 | 11.737 | 9.284  | 3.368 | 0.1815  | -0.1348 | -0.1554 |
| 4STYR  | B  | 1213 | 11.389 | 9.675  | 3.307 | 0.1626  | -0.1659 | -0.2044 |
| 4STYR  | R1 | 1214 | 11.371 | 9.910  | 3.392 | 0.1070  | -0.1574 | -0.2378 |
| 4STYR  | R2 | 1215 | 11.446 | 10.167 | 3.351 | 0.1038  | -0.1571 | -0.2419 |
| 4STYR  | R3 | 1216 | 11.184 | 10.100 | 3.347 | 0.1058  | -0.1641 | -0.2605 |
| 5STYR  | B  | 1217 | 11.290 | 9.536  | 3.139 | 0.2023  | -0.1888 | -0.2275 |
| 5STYR  | R1 | 1218 | 11.126 | 9.637  | 3.322 | 0.1543  | -0.1945 | -0.2632 |
| 5STYR  | R2 | 1219 | 10.886 | 9.759  | 3.335 | 0.1421  | -0.2142 | -0.3012 |
| 5STYR  | R3 | 1220 | 10.946 | 9.561  | 3.508 | 0.1506  | -0.1746 | -0.2587 |
| 6STYR  | B  | 1221 | 11.332 | 9.319  | 3.065 | 0.2004  | -0.1895 | -0.2068 |

|        |    |      |        |       |       |        |         |         |
|--------|----|------|--------|-------|-------|--------|---------|---------|
| 6STYR  | R1 | 1222 | 11.284 | 9.479 | 2.879 | 0.2297 | -0.2081 | -0.2147 |
| 6STYR  | R2 | 1223 | 11.153 | 9.485 | 2.643 | 0.2655 | -0.2101 | -0.2347 |
| 6STYR  | R3 | 1224 | 11.407 | 9.577 | 2.659 | 0.2581 | -0.1965 | -0.1938 |
| 7STYR  | B  | 1225 | 11.431 | 9.124 | 3.112 | 0.2176 | -0.1654 | -0.1867 |
| 7STYR  | R1 | 1226 | 11.279 | 9.223 | 3.295 | 0.1927 | -0.1801 | -0.2150 |
| 7STYR  | R2 | 1227 | 11.081 | 9.139 | 3.459 | 0.1768 | -0.1934 | -0.2409 |
| 7STYR  | R3 | 1228 | 11.298 | 9.263 | 3.562 | 0.1411 | -0.1519 | -0.2156 |
| 8STYR  | B  | 1229 | 11.602 | 8.980 | 3.045 | 0.2282 | -0.1759 | -0.1620 |
| 8STYR  | R1 | 1230 | 11.484 | 8.930 | 3.275 | 0.1890 | -0.1418 | -0.1716 |
| 8STYR  | R2 | 1231 | 11.335 | 8.766 | 3.430 | 0.1918 | -0.1705 | -0.1992 |
| 8STYR  | R3 | 1232 | 11.554 | 8.887 | 3.532 | 0.1749 | -0.1634 | -0.1713 |
| 9STYR  | B  | 1233 | 11.593 | 8.760 | 2.949 | 0.2472 | -0.1642 | -0.1429 |
| 9STYR  | R1 | 1234 | 11.790 | 8.919 | 2.880 | 0.2421 | -0.1662 | -0.1331 |
| 9STYR  | R2 | 1235 | 11.885 | 9.024 | 2.650 | 0.2661 | -0.1804 | -0.1297 |
| 9STYR  | R3 | 1236 | 12.056 | 8.930 | 2.837 | 0.2476 | -0.1452 | -0.0948 |
| 10STYR | B  | 1237 | 11.382 | 8.641 | 2.928 | 0.2401 | -0.1983 | -0.1912 |
| 10STYR | R1 | 1238 | 11.438 | 8.849 | 2.760 | 0.2859 | -0.1824 | -0.1644 |
| 10STYR | R2 | 1239 | 11.439 | 8.895 | 2.494 | 0.3080 | -0.2069 | -0.1687 |
| 10STYR | R3 | 1240 | 11.357 | 9.088 | 2.665 | 0.2814 | -0.1957 | -0.1940 |
| 11STYR | B  | 1241 | 11.265 | 8.500 | 3.063 | 0.2390 | -0.1933 | -0.1972 |
| 11STYR | R1 | 1242 | 11.517 | 8.501 | 3.114 | 0.2448 | -0.1828 | -0.1583 |
| 11STYR | R2 | 1243 | 11.695 | 8.526 | 3.316 | 0.2139 | -0.1446 | -0.1357 |
| 11STYR | R3 | 1244 | 11.699 | 8.307 | 3.158 | 0.2596 | -0.1590 | -0.1144 |
| 12STYR | B  | 1245 | 11.043 | 8.442 | 3.092 | 0.2599 | -0.2030 | -0.1931 |
| 12STYR | R1 | 1246 | 11.092 | 8.695 | 3.021 | 0.2562 | -0.1821 | -0.2041 |
| 12STYR | R2 | 1247 | 11.017 | 8.875 | 2.834 | 0.2429 | -0.2102 | -0.2258 |
| 12STYR | R3 | 1248 | 11.018 | 8.944 | 3.094 | 0.2169 | -0.1852 | -0.2322 |
| 13STYR | B  | 1249 | 10.945 | 8.219 | 3.104 | 0.2702 | -0.1897 | -0.1975 |
| 13STYR | R1 | 1250 | 11.087 | 8.353 | 3.313 | 0.2320 | -0.1933 | -0.2019 |
| 13STYR | R2 | 1251 | 11.059 | 8.452 | 3.563 | 0.1778 | -0.2014 | -0.2045 |
| 13STYR | R3 | 1252 | 11.290 | 8.334 | 3.490 | 0.2166 | -0.1425 | -0.1782 |
| 14STYR | B  | 1253 | 10.961 | 8.060 | 2.923 | 0.2975 | -0.2159 | -0.1836 |
| 14STYR | R1 | 1254 | 10.917 | 8.293 | 2.833 | 0.2871 | -0.2294 | -0.2190 |
| 14STYR | R2 | 1255 | 10.742 | 8.387 | 2.650 | 0.3083 | -0.2339 | -0.2415 |
| 14STYR | R3 | 1256 | 10.993 | 8.486 | 2.660 | 0.3030 | -0.2237 | -0.2057 |
| 15STYR | B  | 1257 | 11.134 | 8.066 | 2.753 | 0.3303 | -0.2164 | -0.1743 |
| 15STYR | R1 | 1258 | 11.193 | 8.003 | 3.011 | 0.2878 | -0.2003 | -0.1707 |
| 15STYR | R2 | 1259 | 11.374 | 8.039 | 3.209 | 0.2567 | -0.1736 | -0.1470 |
| 15STYR | R3 | 1260 | 11.258 | 7.798 | 3.174 | 0.2802 | -0.1847 | -0.1480 |
| 16STYR | B  | 1261 | 11.374 | 8.091 | 2.777 | 0.3065 | -0.1846 | -0.1469 |
| 16STYR | R1 | 1262 | 11.294 | 7.954 | 2.564 | 0.3512 | -0.2204 | -0.1482 |
| 16STYR | R2 | 1263 | 11.332 | 7.716 | 2.443 | 0.3738 | -0.2180 | -0.1460 |
| 16STYR | R3 | 1264 | 11.355 | 7.944 | 2.301 | 0.3770 | -0.2162 | -0.1425 |
| 17STYR | B  | 1265 | 11.507 | 8.272 | 2.723 | 0.3147 | -0.1944 | -0.1713 |
| 17STYR | R1 | 1266 | 11.631 | 8.046 | 2.724 | 0.3211 | -0.1939 | -0.1198 |
| 17STYR | R2 | 1267 | 11.757 | 7.870 | 2.563 | 0.3509 | -0.1857 | -0.1055 |
| 17STYR | R3 | 1268 | 11.858 | 7.926 | 2.807 | 0.3244 | -0.1723 | -0.0977 |
| 18STYR | B  | 1269 | 11.635 | 8.419 | 2.643 | 0.3194 | -0.2051 | -0.1175 |
| 18STYR | R1 | 1270 | 11.399 | 8.431 | 2.531 | 0.3311 | -0.1907 | -0.1518 |
| 18STYR | R2 | 1271 | 11.221 | 8.336 | 2.352 | 0.3504 | -0.2208 | -0.1552 |
| 18STYR | R3 | 1272 | 11.407 | 8.516 | 2.275 | 0.3471 | -0.2199 | -0.1610 |
| 19STYR | B  | 1273 | 11.753 | 8.588 | 2.537 | 0.3072 | -0.2044 | -0.1216 |
| 19STYR | R1 | 1274 | 11.767 | 8.351 | 2.430 | 0.3422 | -0.1912 | -0.1135 |
| 19STYR | R2 | 1275 | 11.956 | 8.181 | 2.339 | 0.3704 | -0.1771 | -0.0812 |
| 19STYR | R3 | 1276 | 11.716 | 8.194 | 2.216 | 0.3855 | -0.2052 | -0.1136 |
| 20STYR | B  | 1277 | 11.972 | 8.631 | 2.480 | 0.3120 | -0.1894 | -0.1051 |
| 20STYR | R1 | 1278 | 11.922 | 8.516 | 2.716 | 0.2985 | -0.1793 | -0.1064 |
| 20STYR | R2 | 1279 | 12.022 | 8.309 | 2.858 | 0.2941 | -0.1579 | -0.0718 |
| 20STYR | R3 | 1280 | 11.981 | 8.548 | 2.978 | 0.2619 | -0.1482 | -0.1018 |
| 21STYR | B  | 1281 | 12.125 | 8.770 | 2.372 | 0.3329 | -0.1559 | -0.0884 |
| 21STYR | R1 | 1282 | 12.216 | 8.606 | 2.558 | 0.3225 | -0.1594 | -0.0929 |
| 21STYR | R2 | 1283 | 12.365 | 8.605 | 2.783 | 0.2753 | -0.1387 | -0.0611 |
| 21STYR | R3 | 1284 | 12.392 | 8.406 | 2.602 | 0.3205 | -0.1501 | -0.0422 |
| 22STYR | B  | 1285 | 12.174 | 8.876 | 2.175 | 0.3339 | -0.1741 | -0.0872 |
| 22STYR | R1 | 1286 | 12.005 | 8.681 | 2.152 | 0.3655 | -0.1815 | -0.1021 |
| 22STYR | R2 | 1287 | 11.979 | 8.462 | 1.998 | 0.4056 | -0.1906 | -0.0961 |
| 22STYR | R3 | 1288 | 11.764 | 8.616 | 2.049 | 0.3812 | -0.2175 | -0.1164 |
| 23STYR | B  | 1289 | 12.108 | 8.936 | 1.955 | 0.3752 | -0.1832 | -0.0873 |
| 23STYR | R1 | 1290 | 12.368 | 8.864 | 2.020 | 0.3571 | -0.1786 | -0.0548 |
| 23STYR | R2 | 1291 | 12.626 | 8.946 | 2.014 | 0.3522 | -0.1637 | -0.0622 |
| 23STYR | R3 | 1292 | 12.564 | 8.690 | 1.951 | 0.3653 | -0.1678 | -0.0588 |
| 24STYR | B  | 1293 | 11.956 | 9.066 | 1.820 | 0.3840 | -0.2143 | -0.1316 |
| 24STYR | R1 | 1294 | 12.030 | 8.840 | 1.715 | 0.4023 | -0.2050 | -0.0942 |

|        |    |      |        |        |       |        |         |         |
|--------|----|------|--------|--------|-------|--------|---------|---------|
| 24STYR | R2 | 1295 | 12.141 | 8.752  | 1.485 | 0.4278 | -0.1900 | -0.0876 |
| 24STYR | R3 | 1296 | 11.933 | 8.619  | 1.593 | 0.4243 | -0.2048 | -0.1123 |
| 25STYR | B  | 1297 | 11.784 | 9.212  | 1.787 | 0.3424 | -0.2244 | -0.1735 |
| 25STYR | R1 | 1298 | 11.836 | 9.136  | 2.034 | 0.3409 | -0.2126 | -0.1314 |
| 25STYR | R2 | 1299 | 11.912 | 9.215  | 2.281 | 0.2975 | -0.1814 | -0.1280 |
| 25STYR | R3 | 1300 | 11.734 | 9.014  | 2.253 | 0.3192 | -0.1997 | -0.1342 |
| 26STYR | B  | 1301 | 11.582 | 9.329  | 1.827 | 0.3583 | -0.2275 | -0.1709 |
| 26STYR | R1 | 1302 | 11.614 | 9.228  | 1.575 | 0.3770 | -0.2485 | -0.1659 |
| 26STYR | R2 | 1303 | 11.510 | 9.066  | 1.385 | 0.4230 | -0.2578 | -0.1832 |
| 26STYR | R3 | 1304 | 11.610 | 9.308  | 1.317 | 0.4064 | -0.2460 | -0.1656 |
| 27STYR | B  | 1305 | 11.368 | 9.378  | 1.742 | 0.3649 | -0.2547 | -0.2173 |
| 27STYR | R1 | 1306 | 11.500 | 9.581  | 1.861 | 0.3291 | -0.2329 | -0.2089 |
| 27STYR | R2 | 1307 | 11.460 | 9.775  | 2.044 | 0.3026 | -0.2322 | -0.2153 |
| 27STYR | R3 | 1308 | 11.579 | 9.834  | 1.809 | 0.3158 | -0.2285 | -0.2078 |
| 28STYR | B  | 1309 | 11.165 | 9.500  | 1.783 | 0.3493 | -0.2665 | -0.2372 |
| 28STYR | R1 | 1310 | 11.246 | 9.470  | 1.527 | 0.3879 | -0.2921 | -0.2308 |
| 28STYR | R2 | 1311 | 11.177 | 9.392  | 1.278 | 0.4040 | -0.2788 | -0.2395 |
| 28STYR | R3 | 1312 | 11.293 | 9.632  | 1.316 | 0.3948 | -0.2778 | -0.2182 |
| 29STYR | B  | 1313 | 11.054 | 9.580  | 1.991 | 0.3114 | -0.2666 | -0.2343 |
| 29STYR | R1 | 1314 | 11.100 | 9.763  | 1.793 | 0.3351 | -0.2593 | -0.2545 |
| 29STYR | R2 | 1315 | 10.971 | 9.945  | 1.641 | 0.3385 | -0.2732 | -0.2739 |
| 29STYR | R3 | 1316 | 11.199 | 10.013 | 1.769 | 0.3112 | -0.2483 | -0.2385 |
| 30STYR | B  | 1317 | 10.969 | 9.535  | 2.209 | 0.2885 | -0.2439 | -0.2704 |
| 30STYR | R1 | 1318 | 11.208 | 9.435  | 2.173 | 0.3040 | -0.2252 | -0.2196 |
| 30STYR | R2 | 1319 | 11.455 | 9.414  | 2.281 | 0.2996 | -0.2232 | -0.2088 |
| 30STYR | R3 | 1320 | 11.320 | 9.192  | 2.207 | 0.3026 | -0.2246 | -0.2103 |
| 31STYR | B  | 1321 | 10.833 | 9.620  | 2.377 | 0.2797 | -0.2704 | -0.2886 |
| 31STYR | R1 | 1322 | 10.844 | 9.758  | 2.154 | 0.2932 | -0.2646 | -0.2914 |
| 31STYR | R2 | 1323 | 10.879 | 10.016 | 2.081 | 0.2732 | -0.2641 | -0.2994 |
| 31STYR | R3 | 1324 | 10.672 | 9.874  | 1.981 | 0.2904 | -0.2866 | -0.3035 |
| 32STYR | B  | 1325 | 10.702 | 9.542  | 2.560 | 0.2653 | -0.2419 | -0.2890 |
| 32STYR | R1 | 1326 | 10.814 | 9.357  | 2.419 | 0.2827 | -0.2565 | -0.2700 |
| 32STYR | R2 | 1327 | 10.974 | 9.144  | 2.463 | 0.2952 | -0.2468 | -0.2683 |
| 32STYR | R3 | 1328 | 10.745 | 9.115  | 2.323 | 0.2956 | -0.2618 | -0.2657 |
| 33STYR | B  | 1329 | 10.646 | 9.638  | 2.765 | 0.2236 | -0.2457 | -0.3056 |
| 33STYR | R1 | 1330 | 10.647 | 9.797  | 2.549 | 0.2250 | -0.2471 | -0.3103 |
| 33STYR | R2 | 1331 | 10.497 | 9.954  | 2.387 | 0.2536 | -0.2595 | -0.3491 |
| 33STYR | R3 | 1332 | 10.729 | 10.047 | 2.489 | 0.2342 | -0.2508 | -0.3127 |
| 34STYR | B  | 1333 | 10.781 | 9.795  | 2.892 | 0.1948 | -0.2428 | -0.3127 |
| 34STYR | R1 | 1334 | 10.551 | 9.691  | 2.994 | 0.1893 | -0.2345 | -0.3154 |
| 34STYR | R2 | 1335 | 10.309 | 9.750  | 3.099 | 0.1647 | -0.2458 | -0.3650 |
| 34STYR | R3 | 1336 | 10.465 | 9.564  | 3.217 | 0.1571 | -0.2254 | -0.3224 |
| 35STYR | B  | 1337 | 11.014 | 9.836  | 2.874 | 0.1940 | -0.2150 | -0.2741 |
| 35STYR | R1 | 1338 | 10.878 | 10.044 | 2.931 | 0.1926 | -0.2159 | -0.2913 |
| 35STYR | R2 | 1339 | 10.869 | 10.252 | 3.103 | 0.1514 | -0.2101 | -0.3004 |
| 35STYR | R3 | 1340 | 10.870 | 10.297 | 2.837 | 0.1769 | -0.2203 | -0.3021 |
| 36STYR | B  | 1341 | 11.222 | 9.926  | 2.907 | 0.1794 | -0.2047 | -0.2397 |
| 36STYR | R1 | 1342 | 11.145 | 9.924  | 2.654 | 0.1988 | -0.2118 | -0.2576 |
| 36STYR | R2 | 1343 | 11.217 | 9.854  | 2.403 | 0.2408 | -0.2247 | -0.2419 |
| 36STYR | R3 | 1344 | 11.144 | 10.108 | 2.456 | 0.2083 | -0.2277 | -0.2724 |
| 37STYR | B  | 1345 | 11.450 | 9.941  | 2.953 | 0.1841 | -0.1930 | -0.2245 |
| 37STYR | R1 | 1346 | 11.318 | 10.166 | 2.918 | 0.1731 | -0.1941 | -0.2465 |
| 37STYR | R2 | 1347 | 11.283 | 10.409 | 3.031 | 0.1533 | -0.1902 | -0.2608 |
| 37STYR | R3 | 1348 | 11.329 | 10.388 | 2.765 | 0.1932 | -0.1996 | -0.2532 |
| 38STYR | B  | 1349 | 11.650 | 9.814  | 2.962 | 0.1704 | -0.1783 | -0.2254 |
| 38STYR | R1 | 1350 | 11.679 | 10.076 | 2.998 | 0.1456 | -0.1589 | -0.2049 |
| 38STYR | R2 | 1351 | 11.794 | 10.264 | 3.154 | 0.1411 | -0.1660 | -0.1931 |
| 38STYR | R3 | 1352 | 11.782 | 10.299 | 2.887 | 0.1750 | -0.1674 | -0.1948 |
| 39STYR | B  | 1353 | 11.877 | 9.845  | 2.905 | 0.1966 | -0.1628 | -0.1671 |
| 39STYR | R1 | 1354 | 11.688 | 9.892  | 2.713 | 0.2151 | -0.1814 | -0.1992 |
| 39STYR | R2 | 1355 | 11.648 | 9.839  | 2.451 | 0.2375 | -0.1969 | -0.1995 |
| 39STYR | R3 | 1356 | 11.593 | 10.084 | 2.549 | 0.2224 | -0.1932 | -0.2173 |
| 40STYR | B  | 1357 | 12.084 | 9.730  | 2.884 | 0.1945 | -0.1533 | -0.1643 |
| 40STYR | R1 | 1358 | 12.038 | 9.953  | 2.733 | 0.2103 | -0.1609 | -0.1642 |
| 40STYR | R2 | 1359 | 12.142 | 10.195 | 2.672 | 0.2154 | -0.1615 | -0.1579 |
| 40STYR | R3 | 1360 | 12.034 | 10.042 | 2.478 | 0.2281 | -0.1617 | -0.1648 |
| 41STYR | B  | 1361 | 12.218 | 9.533  | 2.857 | 0.2303 | -0.1378 | -0.1035 |
| 41STYR | R1 | 1362 | 12.342 | 9.767  | 2.842 | 0.2027 | -0.1297 | -0.0977 |
| 41STYR | R2 | 1363 | 12.484 | 9.931  | 2.682 | 0.1990 | -0.1251 | -0.0963 |
| 41STYR | R3 | 1364 | 12.560 | 9.894  | 2.939 | 0.2020 | -0.1285 | -0.0976 |
| 42STYR | B  | 1365 | 12.229 | 9.315  | 2.762 | 0.2432 | -0.1442 | -0.0884 |
| 42STYR | R1 | 1366 | 11.991 | 9.423  | 2.777 | 0.2368 | -0.1580 | -0.1504 |
| 42STYR | R2 | 1367 | 11.737 | 9.371  | 2.854 | 0.2302 | -0.1611 | -0.1738 |

|        |    |      |        |        |       |         |         |         |
|--------|----|------|--------|--------|-------|---------|---------|---------|
| 42STYR | R3 | 1368 | 11.787 | 9.457  | 2.602 | 0.2530  | -0.1664 | -0.1711 |
| 43STYR | B  | 1369 | 12.294 | 9.189  | 2.561 | 0.2883  | -0.1367 | -0.0849 |
| 43STYR | R1 | 1370 | 12.468 | 9.365  | 2.667 | 0.2468  | -0.1461 | -0.0876 |
| 43STYR | R2 | 1371 | 12.645 | 9.553  | 2.588 | 0.2335  | -0.1284 | -0.0749 |
| 43STYR | R3 | 1372 | 12.719 | 9.365  | 2.767 | 0.2406  | -0.1233 | -0.0725 |
| 44STYR | B  | 1373 | 12.388 | 9.241  | 2.346 | 0.3039  | -0.1499 | -0.0956 |
| 44STYR | R1 | 1374 | 12.494 | 9.033  | 2.475 | 0.2956  | -0.1470 | -0.0561 |
| 44STYR | R2 | 1375 | 12.734 | 8.951  | 2.568 | 0.2885  | -0.1288 | -0.0213 |
| 44STYR | R3 | 1376 | 12.580 | 8.782  | 2.424 | 0.3268  | -0.1370 | -0.0528 |
| 45STYR | B  | 1377 | 12.330 | 9.296  | 2.122 | 0.3060  | -0.1679 | -0.0734 |
| 45STYR | R1 | 1378 | 12.571 | 9.356  | 2.182 | 0.3022  | -0.1440 | -0.0661 |
| 45STYR | R2 | 1379 | 12.827 | 9.326  | 2.101 | 0.3128  | -0.1337 | -0.0365 |
| 45STYR | R3 | 1380 | 12.730 | 9.572  | 2.154 | 0.2967  | -0.1376 | -0.0479 |
| 46STYR | B  | 1381 | 12.192 | 9.415  | 1.981 | 0.3318  | -0.2015 | -0.1167 |
| 46STYR | R1 | 1382 | 12.255 | 9.518  | 2.218 | 0.3064  | -0.1580 | -0.1189 |
| 46STYR | R2 | 1383 | 12.350 | 9.752  | 2.313 | 0.2757  | -0.1467 | -0.1155 |
| 46STYR | R3 | 1384 | 12.142 | 9.632  | 2.435 | 0.2806  | -0.1673 | -0.1274 |
| 47STYR | B  | 1385 | 12.143 | 9.513  | 1.767 | 0.3309  | -0.2043 | -0.1210 |
| 47STYR | R1 | 1386 | 12.334 | 9.320  | 1.783 | 0.3443  | -0.1881 | -0.0825 |
| 47STYR | R2 | 1387 | 12.405 | 9.095  | 1.651 | 0.3720  | -0.1774 | -0.0861 |
| 47STYR | R3 | 1388 | 12.592 | 9.279  | 1.715 | 0.3522  | -0.1635 | -0.0674 |
| 48STYR | B  | 1389 | 11.946 | 9.600  | 1.667 | 0.3634  | -0.2208 | -0.1515 |
| 48STYR | R1 | 1390 | 11.961 | 9.627  | 1.927 | 0.3210  | -0.2036 | -0.1401 |
| 48STYR | R2 | 1391 | 11.818 | 9.590  | 2.153 | 0.3162  | -0.2010 | -0.1427 |
| 48STYR | R3 | 1392 | 11.933 | 9.830  | 2.104 | 0.2702  | -0.1845 | -0.1700 |
| 49STYR | B  | 1393 | 11.821 | 9.641  | 1.476 | 0.3551  | -0.2186 | -0.1842 |
| 49STYR | R1 | 1394 | 12.009 | 9.442  | 1.471 | 0.3890  | -0.2202 | -0.1264 |
| 49STYR | R2 | 1395 | 12.034 | 9.183  | 1.399 | 0.4174  | -0.2161 | -0.1312 |
| 49STYR | R3 | 1396 | 12.228 | 9.359  | 1.335 | 0.4090  | -0.1983 | -0.1075 |
| 50STYR | B  | 1397 | 11.725 | 9.820  | 1.347 | 0.3830  | -0.2418 | -0.1923 |
| 50STYR | R1 | 1398 | 11.917 | 9.880  | 1.532 | 0.3585  | -0.2323 | -0.1694 |
| 50STYR | R2 | 1399 | 11.961 | 10.054 | 1.734 | 0.3167  | -0.2189 | -0.1718 |
| 50STYR | R3 | 1400 | 12.160 | 9.995  | 1.562 | 0.3394  | -0.1962 | -0.1533 |
| 1STYR  | B  | 1401 | 14.228 | 8.876  | 3.821 | 0.1581  | 0.0251  | 0.1440  |
| 1STYR  | R1 | 1402 | 14.407 | 8.702  | 3.912 | 0.1466  | 0.0347  | 0.1734  |
| 1STYR  | R2 | 1403 | 14.416 | 8.437  | 3.962 | 0.1710  | 0.0376  | 0.1840  |
| 1STYR  | R3 | 1404 | 14.494 | 8.613  | 4.151 | 0.1175  | 0.0540  | 0.1912  |
| 2STYR  | B  | 1405 | 14.073 | 8.993  | 3.951 | 0.1189  | 0.0166  | 0.1227  |
| 2STYR  | R1 | 1406 | 14.304 | 9.114  | 3.910 | 0.0939  | 0.0375  | 0.1443  |
| 2STYR  | R2 | 1407 | 14.509 | 9.230  | 4.042 | 0.0898  | 0.0235  | 0.1628  |
| 2STYR  | R3 | 1408 | 14.401 | 9.352  | 3.825 | 0.1258  | 0.0248  | 0.1456  |
| 3STYR  | B  | 1409 | 13.851 | 9.047  | 3.998 | 0.1211  | 0.0011  | 0.0961  |
| 3STYR  | R1 | 1410 | 13.900 | 8.936  | 3.760 | 0.1483  | -0.0041 | 0.1156  |
| 3STYR  | R2 | 1411 | 13.873 | 8.972  | 3.494 | 0.1865  | -0.0037 | 0.1117  |
| 3STYR  | R3 | 1412 | 13.802 | 8.737  | 3.607 | 0.1656  | -0.0021 | 0.1020  |
| 4STYR  | B  | 1413 | 13.695 | 9.152  | 4.124 | 0.0773  | -0.0062 | 0.0804  |
| 4STYR  | R1 | 1414 | 13.930 | 9.267  | 4.098 | 0.1020  | 0.0076  | 0.1012  |
| 4STYR  | R2 | 1415 | 14.036 | 9.502  | 4.020 | 0.1003  | 0.0109  | 0.1089  |
| 4STYR  | R3 | 1416 | 14.144 | 9.368  | 4.228 | 0.0870  | 0.0162  | 0.1192  |
| 5STYR  | B  | 1417 | 13.508 | 9.289  | 4.130 | 0.0808  | -0.0143 | 0.0515  |
| 5STYR  | R1 | 1418 | 13.604 | 9.245  | 3.887 | 0.1297  | -0.0202 | 0.0562  |
| 5STYR  | R2 | 1419 | 13.528 | 9.181  | 3.636 | 0.1506  | -0.0098 | 0.0473  |
| 5STYR  | R3 | 1420 | 13.718 | 9.369  | 3.676 | 0.1371  | -0.0013 | 0.0712  |
| 6STYR  | B  | 1421 | 13.379 | 9.424  | 4.000 | 0.0946  | -0.0343 | 0.0286  |
| 6STYR  | R1 | 1422 | 13.255 | 9.309  | 4.196 | 0.0725  | -0.0184 | 0.0148  |
| 6STYR  | R2 | 1423 | 13.099 | 9.349  | 4.412 | 0.0487  | -0.0186 | -0.0024 |
| 6STYR  | R3 | 1424 | 13.039 | 9.152  | 4.237 | 0.0685  | -0.0190 | -0.0087 |
| 7STYR  | B  | 1425 | 13.234 | 9.610  | 4.008 | 0.0651  | -0.0235 | -0.0138 |
| 7STYR  | R1 | 1426 | 13.493 | 9.658  | 3.971 | 0.0926  | -0.0219 | 0.0255  |
| 7STYR  | R2 | 1427 | 13.701 | 9.809  | 4.054 | 0.0653  | 0.0022  | 0.0502  |
| 7STYR  | R3 | 1428 | 13.646 | 9.788  | 3.790 | 0.0937  | 0.0031  | 0.0442  |
| 8STYR  | B  | 1429 | 13.235 | 9.804  | 4.159 | 0.0437  | -0.0204 | -0.0213 |
| 8STYR  | R1 | 1430 | 13.129 | 9.823  | 3.900 | 0.0956  | -0.0269 | -0.0212 |
| 8STYR  | R2 | 1431 | 12.910 | 9.908  | 3.765 | 0.0980  | -0.0486 | -0.0388 |
| 8STYR  | R3 | 1432 | 13.157 | 9.960  | 3.669 | 0.1001  | -0.0539 | -0.0367 |
| 9STYR  | B  | 1433 | 13.198 | 9.787  | 4.395 | 0.0318  | -0.0205 | -0.0382 |
| 9STYR  | R1 | 1434 | 13.383 | 9.955  | 4.341 | 0.0293  | -0.0280 | 0.0059  |
| 9STYR  | R2 | 1435 | 13.630 | 10.019 | 4.429 | 0.0169  | 0.0095  | 0.0135  |
| 9STYR  | R3 | 1436 | 13.443 | 10.211 | 4.399 | -0.0088 | -0.0176 | -0.0007 |
| 10STYR | B  | 1437 | 13.046 | 9.775  | 4.560 | 0.0151  | -0.0069 | -0.0333 |
| 10STYR | R1 | 1438 | 13.003 | 9.958  | 4.379 | 0.0081  | -0.0202 | -0.0388 |
| 10STYR | R2 | 1439 | 12.820 | 10.069 | 4.213 | 0.0281  | -0.0320 | -0.0689 |
| 10STYR | R3 | 1440 | 12.977 | 10.227 | 4.366 | -0.0090 | -0.0220 | -0.0408 |

|        |    |      |        |        |       |         |         |         |
|--------|----|------|--------|--------|-------|---------|---------|---------|
| 11STYR | B  | 1441 | 12.979 | 9.725  | 4.784 | -0.0239 | 0.0019  | -0.0309 |
| 11STYR | R1 | 1442 | 13.159 | 9.930  | 4.740 | -0.0082 | -0.0057 | -0.0256 |
| 11STYR | R2 | 1443 | 13.194 | 10.196 | 4.773 | -0.0346 | -0.0001 | -0.0430 |
| 11STYR | R3 | 1444 | 13.400 | 10.026 | 4.814 | -0.0321 | 0.0183  | 0.0208  |
| 12STYR | B  | 1445 | 12.780 | 9.622  | 4.872 | -0.0447 | -0.0315 | -0.0559 |
| 12STYR | R1 | 1446 | 12.993 | 9.478  | 4.885 | -0.0306 | -0.0111 | -0.0163 |
| 12STYR | R2 | 1447 | 13.112 | 9.336  | 5.081 | -0.0330 | 0.0074  | -0.0012 |
| 12STYR | R3 | 1448 | 13.083 | 9.229  | 4.834 | 0.0016  | -0.0027 | -0.0009 |
| 13STYR | B  | 1449 | 12.565 | 9.666  | 4.932 | -0.0293 | -0.0327 | -0.0890 |
| 13STYR | R1 | 1450 | 12.710 | 9.872  | 4.842 | -0.0447 | -0.0264 | -0.0755 |
| 13STYR | R2 | 1451 | 12.688 | 10.070 | 4.661 | -0.0043 | -0.0299 | -0.0844 |
| 13STYR | R3 | 1452 | 12.805 | 10.118 | 4.899 | -0.0405 | -0.0302 | -0.0665 |
| 14STYR | B  | 1453 | 12.373 | 9.781  | 4.886 | -0.0235 | -0.0272 | -0.1120 |
| 14STYR | R1 | 1454 | 12.384 | 9.634  | 5.112 | -0.0553 | -0.0332 | -0.1089 |
| 14STYR | R2 | 1455 | 12.242 | 9.446  | 5.244 | -0.0507 | -0.0391 | -0.1124 |
| 14STYR | R3 | 1456 | 12.374 | 9.637  | 5.382 | -0.0845 | -0.0174 | -0.1100 |
| 15STYR | B  | 1457 | 12.246 | 9.949  | 4.774 | -0.0301 | -0.0495 | -0.1169 |
| 15STYR | R1 | 1458 | 12.357 | 9.773  | 4.610 | 0.0024  | -0.0449 | -0.1145 |
| 15STYR | R2 | 1459 | 12.299 | 9.623  | 4.393 | 0.0393  | -0.0676 | -0.1087 |
| 15STYR | R3 | 1460 | 12.481 | 9.821  | 4.375 | 0.0388  | -0.0664 | -0.0996 |
| 16STYR | B  | 1461 | 12.118 | 10.131 | 4.892 | -0.0286 | -0.0510 | -0.1640 |
| 16STYR | R1 | 1462 | 12.217 | 10.163 | 4.627 | -0.0303 | -0.0663 | -0.1493 |
| 16STYR | R2 | 1463 | 12.378 | 10.317 | 4.475 | -0.0245 | -0.0675 | -0.1444 |
| 16STYR | R3 | 1464 | 12.142 | 10.232 | 4.377 | -0.0120 | -0.0842 | -0.1598 |
| 17STYR | B  | 1465 | 12.130 | 10.094 | 5.155 | -0.0789 | -0.0402 | -0.1467 |
| 17STYR | R1 | 1466 | 11.889 | 10.042 | 5.012 | -0.0548 | -0.0550 | -0.1812 |
| 17STYR | R2 | 1467 | 11.693 | 9.861  | 4.969 | -0.0317 | -0.0755 | -0.2006 |
| 17STYR | R3 | 1468 | 11.630 | 10.115 | 5.036 | -0.0647 | -0.0841 | -0.1990 |
| 18STYR | B  | 1469 | 12.350 | 10.063 | 5.262 | -0.1064 | -0.0389 | -0.1386 |
| 18STYR | R1 | 1470 | 12.140 | 10.032 | 5.420 | -0.1051 | -0.0262 | -0.1459 |
| 18STYR | R2 | 1471 | 12.043 | 9.849  | 5.593 | -0.1299 | -0.0322 | -0.1660 |
| 18STYR | R3 | 1472 | 12.048 | 10.110 | 5.662 | -0.1555 | -0.0325 | -0.1629 |
| 19STYR | B  | 1473 | 12.581 | 10.016 | 5.250 | -0.0853 | -0.0121 | -0.0871 |
| 19STYR | R1 | 1474 | 12.489 | 10.248 | 5.144 | -0.0747 | -0.0246 | -0.1160 |
| 19STYR | R2 | 1475 | 12.483 | 10.394 | 4.917 | -0.0839 | -0.0345 | -0.1221 |
| 19STYR | R3 | 1476 | 12.543 | 10.512 | 5.152 | -0.0984 | -0.0194 | -0.1260 |
| 20STYR | B  | 1477 | 12.752 | 9.859  | 5.323 | -0.0831 | 0.0110  | -0.0655 |
| 20STYR | R1 | 1478 | 12.603 | 10.003 | 5.505 | -0.1218 | 0.0040  | -0.0886 |
| 20STYR | R2 | 1479 | 12.452 | 9.967  | 5.726 | -0.1397 | 0.0001  | -0.1014 |
| 20STYR | R3 | 1480 | 12.615 | 10.181 | 5.708 | -0.1387 | 0.0008  | -0.0847 |
| 21STYR | B  | 1481 | 12.974 | 9.789  | 5.240 | -0.0844 | 0.0178  | -0.0181 |
| 21STYR | R1 | 1482 | 12.825 | 9.586  | 5.314 | -0.0443 | -0.0038 | -0.0588 |
| 21STYR | R2 | 1483 | 12.880 | 9.360  | 5.450 | -0.0745 | 0.0070  | -0.0285 |
| 21STYR | R3 | 1484 | 12.708 | 9.353  | 5.242 | -0.0478 | -0.0048 | -0.0500 |
| 22STYR | B  | 1485 | 13.144 | 9.951  | 5.195 | -0.1101 | 0.0343  | -0.0344 |
| 22STYR | R1 | 1486 | 13.092 | 9.896  | 5.455 | -0.0958 | 0.0406  | -0.0353 |
| 22STYR | R2 | 1487 | 13.021 | 10.025 | 5.681 | -0.1494 | 0.0411  | -0.0520 |
| 22STYR | R3 | 1488 | 13.225 | 9.848  | 5.684 | -0.1403 | 0.0522  | -0.0068 |
| 23STYR | B  | 1489 | 13.343 | 10.052 | 5.277 | -0.0882 | 0.0323  | -0.0118 |
| 23STYR | R1 | 1490 | 13.101 | 10.191 | 5.236 | -0.0764 | 0.0158  | -0.0517 |
| 23STYR | R2 | 1491 | 12.906 | 10.325 | 5.367 | -0.1112 | -0.0115 | -0.0754 |
| 23STYR | R3 | 1492 | 12.997 | 10.417 | 5.130 | -0.0872 | 0.0076  | -0.0587 |
| 24STYR | B  | 1493 | 13.552 | 9.956  | 5.368 | -0.0947 | 0.0438  | 0.0139  |
| 24STYR | R1 | 1494 | 13.449 | 10.177 | 5.483 | -0.1163 | 0.0496  | -0.0041 |
| 24STYR | R2 | 1495 | 13.378 | 10.286 | 5.720 | -0.1680 | 0.0586  | -0.0238 |
| 24STYR | R3 | 1496 | 13.534 | 10.425 | 5.549 | -0.1503 | 0.0615  | -0.0053 |
| 25STYR | B  | 1497 | 13.773 | 9.861  | 5.351 | -0.0950 | 0.0595  | 0.0712  |
| 25STYR | R1 | 1498 | 13.740 | 10.090 | 5.238 | -0.1040 | 0.0502  | 0.0421  |
| 25STYR | R2 | 1499 | 13.865 | 10.329 | 5.241 | -0.1122 | 0.0545  | 0.0309  |
| 25STYR | R3 | 1500 | 13.776 | 10.226 | 5.008 | -0.0896 | 0.0307  | 0.0328  |
| 26STYR | B  | 1501 | 13.869 | 9.660  | 5.277 | -0.0694 | 0.0544  | 0.0652  |
| 26STYR | R1 | 1502 | 13.636 | 9.646  | 5.420 | -0.0765 | 0.0577  | 0.0638  |
| 26STYR | R2 | 1503 | 13.548 | 9.524  | 5.644 | -0.1100 | 0.0534  | 0.0483  |
| 26STYR | R3 | 1504 | 13.392 | 9.531  | 5.423 | -0.0698 | 0.0422  | 0.0195  |
| 27STYR | B  | 1505 | 13.791 | 9.480  | 5.149 | -0.0484 | 0.0510  | 0.0734  |
| 27STYR | R1 | 1506 | 13.867 | 9.686  | 5.010 | -0.0414 | 0.0562  | 0.0694  |
| 27STYR | R2 | 1507 | 14.022 | 9.752  | 4.799 | -0.0235 | 0.0356  | 0.0762  |
| 27STYR | R3 | 1508 | 13.763 | 9.829  | 4.806 | -0.0235 | 0.0380  | 0.0475  |
| 28STYR | B  | 1509 | 13.720 | 9.274  | 5.088 | -0.0316 | 0.0649  | 0.0692  |
| 28STYR | R1 | 1510 | 13.891 | 9.304  | 5.296 | -0.0560 | 0.0781  | 0.0918  |
| 28STYR | R2 | 1511 | 14.137 | 9.263  | 5.399 | -0.0695 | 0.0891  | 0.1290  |
| 28STYR | R3 | 1512 | 13.919 | 9.223  | 5.552 | -0.0912 | 0.0754  | 0.0948  |
| 29STYR | B  | 1513 | 13.511 | 9.179  | 5.030 | -0.0035 | 0.0282  | 0.0384  |

|        |    |      |        |       |       |         |         |        |
|--------|----|------|--------|-------|-------|---------|---------|--------|
| 29STYR | R1 | 1514 | 13.523 | 9.426 | 4.978 | -0.0128 | 0.0372  | 0.0432 |
| 29STYR | R2 | 1515 | 13.398 | 9.661 | 5.024 | -0.0469 | 0.0207  | 0.0354 |
| 29STYR | R3 | 1516 | 13.417 | 9.564 | 4.772 | -0.0210 | 0.0217  | 0.0369 |
| 30STYR | B  | 1517 | 13.453 | 8.947 | 5.020 | -0.0151 | 0.0388  | 0.0539 |
| 30STYR | R1 | 1518 | 13.424 | 9.084 | 5.248 | -0.0273 | 0.0427  | 0.0342 |
| 30STYR | R2 | 1519 | 13.230 | 9.115 | 5.433 | -0.0514 | 0.0157  | 0.0136 |
| 30STYR | R3 | 1520 | 13.489 | 9.107 | 5.509 | -0.0577 | 0.0594  | 0.0404 |
| 31STYR | B  | 1521 | 13.621 | 8.799 | 4.922 | 0.0330  | 0.0151  | 0.0991 |
| 31STYR | R1 | 1522 | 13.465 | 8.979 | 4.760 | 0.0375  | 0.0272  | 0.0667 |
| 31STYR | R2 | 1523 | 13.310 | 8.958 | 4.540 | 0.0471  | -0.0137 | 0.0637 |
| 31STYR | R3 | 1524 | 13.455 | 9.182 | 4.582 | 0.0342  | 0.0000  | 0.0358 |
| 32STYR | B  | 1525 | 13.624 | 8.562 | 4.892 | 0.0414  | 0.0287  | 0.0810 |
| 32STYR | R1 | 1526 | 13.504 | 8.647 | 5.116 | -0.0018 | 0.0383  | 0.0759 |
| 32STYR | R2 | 1527 | 13.498 | 8.582 | 5.379 | -0.0273 | 0.0417  | 0.0762 |
| 32STYR | R3 | 1528 | 13.267 | 8.626 | 5.245 | -0.0159 | 0.0105  | 0.0458 |
| 33STYR | B  | 1529 | 13.606 | 8.476 | 4.649 | 0.0771  | 0.0102  | 0.1011 |
| 33STYR | R1 | 1530 | 13.725 | 8.330 | 4.876 | 0.0619  | 0.0316  | 0.1219 |
| 33STYR | R2 | 1531 | 13.717 | 8.110 | 5.032 | 0.0464  | 0.0492  | 0.1460 |
| 33STYR | R3 | 1532 | 13.954 | 8.218 | 4.963 | 0.0532  | 0.0443  | 0.1617 |
| 34STYR | B  | 1533 | 13.693 | 8.673 | 4.488 | 0.0918  | 0.0171  | 0.1142 |
| 34STYR | R1 | 1534 | 13.547 | 8.465 | 4.374 | 0.1200  | 0.0005  | 0.0734 |
| 34STYR | R2 | 1535 | 13.349 | 8.453 | 4.190 | 0.1348  | -0.0155 | 0.0585 |
| 34STYR | R3 | 1536 | 13.565 | 8.292 | 4.167 | 0.1460  | -0.0035 | 0.0789 |
| 35STYR | B  | 1537 | 13.819 | 8.885 | 4.480 | 0.0770  | 0.0178  | 0.0872 |
| 35STYR | R1 | 1538 | 13.847 | 8.694 | 4.282 | 0.0979  | 0.0138  | 0.1041 |
| 35STYR | R2 | 1539 | 14.051 | 8.583 | 4.145 | 0.1311  | 0.0343  | 0.1366 |
| 35STYR | R3 | 1540 | 13.809 | 8.609 | 4.029 | 0.1380  | -0.0204 | 0.1095 |
| 36STYR | B  | 1541 | 13.870 | 9.128 | 4.527 | 0.0254  | 0.0360  | 0.0922 |
| 36STYR | R1 | 1542 | 14.082 | 8.979 | 4.483 | 0.0591  | 0.0297  | 0.1205 |
| 36STYR | R2 | 1543 | 14.304 | 8.963 | 4.330 | 0.0750  | 0.0415  | 0.1424 |
| 36STYR | R3 | 1544 | 14.324 | 8.944 | 4.599 | 0.0520  | 0.0635  | 0.1457 |
| 37STYR | B  | 1545 | 13.939 | 9.294 | 4.698 | 0.0117  | 0.0364  | 0.1016 |
| 37STYR | R1 | 1546 | 13.817 | 9.410 | 4.507 | 0.0543  | 0.0330  | 0.0753 |
| 37STYR | R2 | 1547 | 13.623 | 9.580 | 4.426 | 0.0390  | -0.0024 | 0.0370 |
| 37STYR | R3 | 1548 | 13.883 | 9.649 | 4.398 | 0.0323  | 0.0340  | 0.0642 |
| 38STYR | B  | 1549 | 14.098 | 9.230 | 4.883 | -0.0108 | 0.0529  | 0.1092 |
| 38STYR | R1 | 1550 | 14.214 | 9.365 | 4.689 | 0.0188  | 0.0521  | 0.1183 |
| 38STYR | R2 | 1551 | 14.438 | 9.342 | 4.540 | 0.0336  | 0.0690  | 0.1381 |
| 38STYR | R3 | 1552 | 14.382 | 9.575 | 4.665 | 0.0057  | 0.0644  | 0.1341 |
| 39STYR | B  | 1553 | 14.086 | 9.010 | 4.979 | -0.0080 | 0.0596  | 0.1289 |
| 39STYR | R1 | 1554 | 14.321 | 9.140 | 4.995 | 0.0001  | 0.0718  | 0.1637 |
| 39STYR | R2 | 1555 | 14.513 | 9.233 | 5.161 | -0.0170 | 0.0894  | 0.1737 |
| 39STYR | R3 | 1556 | 14.581 | 9.103 | 4.934 | 0.0065  | 0.0717  | 0.1908 |
| 40STYR | B  | 1557 | 14.052 | 8.785 | 4.919 | 0.0322  | 0.0805  | 0.1358 |
| 40STYR | R1 | 1558 | 14.003 | 8.863 | 5.170 | 0.0029  | 0.0604  | 0.1315 |
| 40STYR | R2 | 1559 | 13.806 | 8.863 | 5.354 | -0.0329 | 0.0618  | 0.0934 |
| 40STYR | R3 | 1560 | 14.063 | 8.835 | 5.431 | -0.0460 | 0.0842  | 0.1454 |
| 41STYR | B  | 1561 | 14.169 | 8.583 | 5.026 | 0.0109  | 0.0628  | 0.1312 |
| 41STYR | R1 | 1562 | 14.122 | 8.577 | 4.751 | 0.0629  | 0.0563  | 0.1580 |
| 41STYR | R2 | 1563 | 14.032 | 8.401 | 4.567 | 0.0822  | 0.0433  | 0.1611 |
| 41STYR | R3 | 1564 | 14.251 | 8.551 | 4.515 | 0.0697  | 0.0617  | 0.1611 |
| 42STYR | B  | 1565 | 14.366 | 8.492 | 4.933 | 0.0215  | 0.0771  | 0.1857 |
| 42STYR | R1 | 1566 | 14.305 | 8.359 | 5.143 | 0.0363  | 0.0850  | 0.1846 |
| 42STYR | R2 | 1567 | 14.411 | 8.249 | 5.366 | -0.0156 | 0.0835  | 0.2087 |
| 42STYR | R3 | 1568 | 14.287 | 8.092 | 5.185 | 0.0299  | 0.0842  | 0.1767 |
| 43STYR | B  | 1569 | 14.496 | 8.327 | 4.827 | 0.0745  | 0.0852  | 0.2138 |
| 43STYR | R1 | 1570 | 14.590 | 8.580 | 4.830 | 0.0483  | 0.0912  | 0.2130 |
| 43STYR | R2 | 1571 | 14.810 | 8.720 | 4.900 | 0.0372  | 0.1021  | 0.2261 |
| 43STYR | R3 | 1572 | 14.697 | 8.758 | 4.657 | 0.0707  | 0.0702  | 0.2053 |
| 44STYR | B  | 1573 | 14.480 | 8.078 | 4.787 | 0.0760  | 0.0689  | 0.2254 |
| 44STYR | R1 | 1574 | 14.682 | 8.201 | 4.952 | 0.0460  | 0.1117  | 0.2288 |
| 44STYR | R2 | 1575 | 14.800 | 8.200 | 5.195 | 0.0182  | 0.1101  | 0.2423 |
| 44STYR | R3 | 1576 | 14.948 | 8.241 | 4.973 | 0.0424  | 0.1200  | 0.2603 |
| 45STYR | B  | 1577 | 14.252 | 7.976 | 4.737 | 0.0984  | 0.0689  | 0.2071 |
| 45STYR | R1 | 1578 | 14.415 | 7.822 | 4.881 | 0.0757  | 0.0859  | 0.2120 |
| 45STYR | R2 | 1579 | 14.418 | 7.682 | 5.112 | 0.0571  | 0.0839  | 0.2110 |
| 45STYR | R3 | 1580 | 14.497 | 7.565 | 4.882 | 0.0955  | 0.0923  | 0.2198 |
| 46STYR | B  | 1581 | 14.055 | 7.971 | 4.605 | 0.0987  | 0.0372  | 0.1673 |
| 46STYR | R1 | 1582 | 14.286 | 8.026 | 4.484 | 0.1328  | 0.0492  | 0.1963 |
| 46STYR | R2 | 1583 | 14.410 | 8.207 | 4.327 | 0.1422  | 0.0407  | 0.1939 |
| 46STYR | R3 | 1584 | 14.421 | 7.945 | 4.265 | 0.1416  | 0.0378  | 0.2059 |
| 47STYR | B  | 1585 | 13.816 | 7.967 | 4.620 | 0.1188  | 0.0406  | 0.1479 |
| 47STYR | R1 | 1586 | 13.968 | 7.820 | 4.801 | 0.1014  | 0.0483  | 0.1562 |

|        |    |      |        |        |       |        |         |         |
|--------|----|------|--------|--------|-------|--------|---------|---------|
| 47STYR | R2 | 1587 | 13.991 | 7.781  | 5.067 | 0.0580 | 0.0631  | 0.1622  |
| 47STYR | R3 | 1588 | 14.007 | 7.571  | 4.898 | 0.1005 | 0.0556  | 0.1753  |
| 48STYR | B  | 1589 | 13.615 | 7.986  | 4.492 | 0.1002 | 0.0186  | 0.1245  |
| 48STYR | R1 | 1590 | 13.847 | 8.014  | 4.361 | 0.1182 | 0.0067  | 0.1386  |
| 48STYR | R2 | 1591 | 13.978 | 8.173  | 4.186 | 0.1420 | 0.0139  | 0.1629  |
| 48STYR | R3 | 1592 | 13.971 | 7.906  | 4.147 | 0.1664 | 0.0132  | 0.1629  |
| 49STYR | B  | 1593 | 13.532 | 7.861  | 4.301 | 0.1400 | 0.0040  | 0.0961  |
| 49STYR | R1 | 1594 | 13.674 | 7.716  | 4.469 | 0.1206 | 0.0159  | 0.1323  |
| 49STYR | R2 | 1595 | 13.664 | 7.482  | 4.604 | 0.1292 | 0.0203  | 0.1407  |
| 49STYR | R3 | 1596 | 13.886 | 7.548  | 4.464 | 0.1426 | 0.0422  | 0.1722  |
| 50STYR | B  | 1597 | 13.554 | 7.664  | 4.173 | 0.1847 | 0.0005  | 0.1379  |
| 50STYR | R1 | 1598 | 13.499 | 7.885  | 4.038 | 0.1858 | -0.0089 | 0.1153  |
| 50STYR | R2 | 1599 | 13.592 | 8.017  | 3.821 | 0.2007 | -0.0162 | 0.1172  |
| 50STYR | R3 | 1600 | 13.326 | 8.001  | 3.866 | 0.1971 | -0.0239 | 0.0937  |
| 1STYR  | B  | 1601 | 12.260 | 9.719  | 3.300 | 0.1431 | -0.1104 | -0.1084 |
| 1STYR  | R1 | 1602 | 12.301 | 9.969  | 3.274 | 0.1467 | -0.1270 | -0.1198 |
| 1STYR  | R2 | 1603 | 12.210 | 10.147 | 3.093 | 0.1634 | -0.1356 | -0.1366 |
| 1STYR  | R3 | 1604 | 12.178 | 10.194 | 3.357 | 0.1218 | -0.1323 | -0.1422 |
| 2STYR  | B  | 1605 | 12.408 | 9.683  | 3.478 | 0.1244 | -0.1083 | -0.0915 |
| 2STYR  | R1 | 1606 | 12.340 | 9.482  | 3.295 | 0.1664 | -0.1107 | -0.0995 |
| 2STYR  | R2 | 1607 | 12.454 | 9.289  | 3.145 | 0.1985 | -0.1128 | -0.0728 |
| 2STYR  | R3 | 1608 | 12.200 | 9.260  | 3.233 | 0.1866 | -0.1207 | -0.1093 |
| 3STYR  | B  | 1609 | 12.577 | 9.581  | 3.625 | 0.1067 | -0.0871 | -0.0815 |
| 3STYR  | R1 | 1610 | 12.443 | 9.775  | 3.743 | 0.1004 | -0.0959 | -0.0950 |
| 3STYR  | R2 | 1611 | 12.309 | 9.833  | 3.970 | 0.0705 | -0.1031 | -0.1107 |
| 3STYR  | R3 | 1612 | 12.512 | 9.991  | 3.888 | 0.0698 | -0.0905 | -0.0883 |
| 4STYR  | B  | 1613 | 12.803 | 9.495  | 3.643 | 0.1335 | -0.0701 | -0.0521 |
| 4STYR  | R1 | 1614 | 12.741 | 9.619  | 3.421 | 0.1485 | -0.0845 | -0.0477 |
| 4STYR  | R2 | 1615 | 12.768 | 9.583  | 3.155 | 0.1717 | -0.1177 | -0.0409 |
| 4STYR  | R3 | 1616 | 12.841 | 9.817  | 3.267 | 0.1747 | -0.1087 | -0.0619 |
| 5STYR  | B  | 1617 | 12.944 | 9.369  | 3.770 | 0.1150 | -0.0615 | -0.0160 |
| 5STYR  | R1 | 1618 | 12.772 | 9.507  | 3.897 | 0.1135 | -0.0691 | -0.0586 |
| 5STYR  | R2 | 1619 | 12.780 | 9.665  | 4.116 | 0.0709 | -0.0515 | -0.0694 |
| 5STYR  | R3 | 1620 | 12.571 | 9.499  | 4.077 | 0.0858 | -0.0658 | -0.0892 |
| 6STYR  | B  | 1621 | 13.097 | 9.183  | 3.761 | 0.1149 | -0.0434 | -0.0083 |
| 6STYR  | R1 | 1622 | 13.138 | 9.415  | 3.608 | 0.1397 | -0.0475 | -0.0028 |
| 6STYR  | R2 | 1623 | 13.341 | 9.586  | 3.556 | 0.1390 | -0.0442 | 0.0051  |
| 6STYR  | R3 | 1624 | 13.169 | 9.517  | 3.360 | 0.1519 | -0.0524 | -0.0033 |
| 7STYR  | B  | 1625 | 13.042 | 8.958  | 3.742 | 0.1634 | -0.0658 | 0.0122  |
| 7STYR  | R1 | 1626 | 13.243 | 8.973  | 3.889 | 0.1216 | -0.0451 | 0.0345  |
| 7STYR  | R2 | 1627 | 13.350 | 8.876  | 4.118 | 0.1115 | -0.0178 | 0.0507  |
| 7STYR  | R3 | 1628 | 13.472 | 8.829  | 3.882 | 0.1506 | -0.0006 | 0.0674  |
| 8STYR  | B  | 1629 | 13.023 | 8.761  | 3.837 | 0.1627 | -0.0691 | 0.0241  |
| 8STYR  | R1 | 1630 | 13.123 | 8.775  | 3.592 | 0.1685 | -0.0713 | 0.0294  |
| 8STYR  | R2 | 1631 | 13.098 | 8.675  | 3.343 | 0.2182 | -0.0701 | 0.0238  |
| 8STYR  | R3 | 1632 | 13.342 | 8.737  | 3.439 | 0.1968 | -0.0480 | 0.0639  |
| 9STYR  | B  | 1633 | 12.962 | 8.539  | 3.842 | 0.1682 | -0.0543 | 0.0123  |
| 9STYR  | R1 | 1634 | 12.959 | 8.673  | 4.083 | 0.1324 | -0.0469 | 0.0170  |
| 9STYR  | R2 | 1635 | 13.037 | 8.673  | 4.341 | 0.0857 | -0.0238 | 0.0314  |
| 9STYR  | R3 | 1636 | 12.798 | 8.777  | 4.273 | 0.1012 | -0.0227 | -0.0224 |
| 10STYR | B  | 1637 | 12.961 | 8.317  | 3.864 | 0.1813 | -0.0473 | 0.0206  |
| 10STYR | R1 | 1638 | 13.177 | 8.399  | 3.758 | 0.1806 | -0.0622 | 0.0646  |
| 10STYR | R2 | 1639 | 13.328 | 8.321  | 3.548 | 0.1998 | -0.0515 | 0.0744  |
| 10STYR | R3 | 1640 | 13.446 | 8.423  | 3.768 | 0.1764 | -0.0174 | 0.0712  |
| 11STYR | B  | 1641 | 12.828 | 8.123  | 3.868 | 0.2070 | -0.0530 | 0.0226  |
| 11STYR | R1 | 1642 | 12.978 | 8.183  | 4.083 | 0.1430 | -0.0356 | 0.0416  |
| 11STYR | R2 | 1643 | 12.964 | 8.232  | 4.348 | 0.1051 | -0.0448 | 0.0413  |
| 11STYR | R3 | 1644 | 13.166 | 8.083  | 4.249 | 0.1311 | -0.0236 | 0.0624  |
| 12STYR | B  | 1645 | 12.848 | 7.910  | 3.947 | 0.1882 | -0.0571 | 0.0490  |
| 12STYR | R1 | 1646 | 12.899 | 7.947  | 3.695 | 0.2210 | -0.0761 | 0.0383  |
| 12STYR | R2 | 1647 | 13.088 | 7.893  | 3.510 | 0.2443 | -0.0607 | 0.0576  |
| 12STYR | R3 | 1648 | 12.828 | 7.848  | 3.454 | 0.2532 | -0.0771 | 0.0291  |
| 13STYR | B  | 1649 | 12.950 | 7.718  | 4.033 | 0.1881 | -0.0282 | 0.0375  |
| 13STYR | R1 | 1650 | 12.694 | 7.708  | 3.931 | 0.2032 | -0.0870 | 0.0225  |
| 13STYR | R2 | 1651 | 12.541 | 7.608  | 3.732 | 0.2225 | -0.0749 | 0.0015  |
| 13STYR | R3 | 1652 | 12.446 | 7.615  | 3.984 | 0.2000 | -0.0952 | -0.0064 |
| 14STYR | B  | 1653 | 13.112 | 7.632  | 4.193 | 0.1826 | -0.0187 | 0.0791  |
| 14STYR | R1 | 1654 | 13.147 | 7.585  | 3.924 | 0.2149 | -0.0476 | 0.0843  |
| 14STYR | R2 | 1655 | 13.176 | 7.382  | 3.748 | 0.2418 | -0.0571 | 0.0997  |
| 14STYR | R3 | 1656 | 13.339 | 7.597  | 3.733 | 0.2467 | -0.0597 | 0.1154  |
| 15STYR | B  | 1657 | 13.165 | 7.655  | 4.447 | 0.1531 | -0.0207 | 0.0772  |
| 15STYR | R1 | 1658 | 12.901 | 7.713  | 4.350 | 0.1526 | -0.0336 | 0.0576  |
| 15STYR | R2 | 1659 | 12.645 | 7.633  | 4.382 | 0.1512 | -0.0448 | 0.0179  |

|        |    |      |        |       |       |         |         |         |
|--------|----|------|--------|-------|-------|---------|---------|---------|
| 15STYR | R3 | 1660 | 12.703 | 7.896 | 4.373 | 0.1396  | -0.0423 | 0.0151  |
| 16STYR | B  | 1661 | 13.078 | 7.826 | 4.586 | 0.1148  | -0.0442 | 0.0604  |
| 16STYR | R1 | 1662 | 13.271 | 7.714 | 4.706 | 0.1004  | -0.0007 | 0.0869  |
| 16STYR | R2 | 1663 | 13.484 | 7.780 | 4.859 | 0.0763  | 0.0305  | 0.1073  |
| 16STYR | R3 | 1664 | 13.301 | 7.604 | 4.951 | 0.0880  | 0.0113  | 0.0938  |
| 17STYR | B  | 1665 | 13.056 | 7.970 | 4.766 | 0.0989  | -0.0166 | 0.0479  |
| 17STYR | R1 | 1666 | 12.904 | 7.754 | 4.772 | 0.1063  | -0.0160 | 0.0272  |
| 17STYR | R2 | 1667 | 12.651 | 7.670 | 4.814 | 0.1068  | -0.0229 | 0.0162  |
| 17STYR | R3 | 1668 | 12.858 | 7.530 | 4.916 | 0.1053  | -0.0048 | 0.0444  |
| 18STYR | B  | 1669 | 12.921 | 7.999 | 4.956 | 0.0472  | -0.0215 | 0.0433  |
| 18STYR | R1 | 1670 | 13.168 | 8.055 | 4.997 | 0.0565  | 0.0180  | 0.0547  |
| 18STYR | R2 | 1671 | 13.337 | 8.005 | 5.203 | 0.0197  | 0.0230  | 0.0862  |
| 18STYR | R3 | 1672 | 13.333 | 8.249 | 5.086 | 0.0365  | 0.0219  | 0.0835  |
| 19STYR | B  | 1673 | 12.886 | 8.146 | 5.144 | 0.0365  | -0.0139 | 0.0160  |
| 19STYR | R1 | 1674 | 12.821 | 7.889 | 5.178 | 0.0245  | 0.0021  | 0.0437  |
| 19STYR | R2 | 1675 | 12.864 | 7.689 | 5.355 | 0.0318  | 0.0114  | 0.0525  |
| 19STYR | R3 | 1676 | 12.618 | 7.725 | 5.249 | 0.0356  | -0.0158 | 0.0344  |
| 20STYR | B  | 1677 | 12.890 | 8.390 | 5.127 | 0.0259  | -0.0181 | 0.0271  |
| 20STYR | R1 | 1678 | 12.974 | 8.284 | 5.353 | 0.0025  | 0.0160  | 0.0340  |
| 20STYR | R2 | 1679 | 13.187 | 8.283 | 5.518 | -0.0308 | 0.0339  | 0.0775  |
| 20STYR | R3 | 1680 | 12.938 | 8.301 | 5.620 | -0.0528 | 0.0213  | 0.0264  |
| 21STYR | B  | 1681 | 12.761 | 8.520 | 4.975 | 0.0466  | -0.0172 | 0.0080  |
| 21STYR | R1 | 1682 | 13.001 | 8.476 | 4.894 | 0.0303  | 0.0035  | 0.0364  |
| 21STYR | R2 | 1683 | 13.188 | 8.642 | 4.793 | 0.0469  | -0.0075 | 0.0491  |
| 21STYR | R3 | 1684 | 13.155 | 8.396 | 4.687 | 0.0601  | -0.0167 | 0.0662  |
| 22STYR | B  | 1685 | 12.537 | 8.585 | 5.002 | 0.0056  | -0.0411 | -0.0348 |
| 22STYR | R1 | 1686 | 12.756 | 8.732 | 5.112 | -0.0032 | -0.0111 | -0.0243 |
| 22STYR | R2 | 1687 | 12.911 | 8.805 | 5.320 | -0.0317 | 0.0009  | -0.0073 |
| 22STYR | R3 | 1688 | 12.876 | 8.974 | 5.113 | -0.0142 | -0.0057 | -0.0157 |
| 23STYR | B  | 1689 | 12.335 | 8.539 | 4.876 | 0.0380  | -0.0349 | -0.0604 |
| 23STYR | R1 | 1690 | 12.557 | 8.450 | 4.767 | 0.0317  | -0.0331 | -0.0321 |
| 23STYR | R2 | 1691 | 12.663 | 8.228 | 4.654 | 0.0811  | -0.0287 | 0.0051  |
| 23STYR | R3 | 1692 | 12.681 | 8.466 | 4.528 | 0.0875  | -0.0339 | -0.0036 |
| 24STYR | B  | 1693 | 12.154 | 8.411 | 4.836 | 0.0560  | -0.0619 | -0.0854 |
| 24STYR | R1 | 1694 | 12.349 | 8.306 | 4.986 | 0.0402  | -0.0487 | -0.0502 |
| 24STYR | R2 | 1695 | 12.480 | 8.070 | 4.989 | 0.0641  | -0.0352 | -0.0202 |
| 24STYR | R3 | 1696 | 12.422 | 8.195 | 5.221 | 0.0201  | -0.0289 | -0.0345 |
| 25STYR | B  | 1697 | 12.047 | 8.192 | 4.868 | 0.0600  | -0.0614 | -0.0927 |
| 25STYR | R1 | 1698 | 12.133 | 8.276 | 4.615 | 0.0875  | -0.0448 | -0.0730 |
| 25STYR | R2 | 1699 | 12.045 | 8.288 | 4.360 | 0.1142  | -0.0908 | -0.0847 |
| 25STYR | R3 | 1700 | 12.306 | 8.240 | 4.410 | 0.1148  | -0.0517 | -0.0489 |
| 26STYR | B  | 1701 | 11.953 | 8.164 | 5.116 | 0.0411  | -0.0442 | -0.0836 |
| 26STYR | R1 | 1702 | 12.053 | 7.938 | 4.984 | 0.0707  | -0.0494 | -0.0812 |
| 26STYR | R2 | 1703 | 11.983 | 7.683 | 4.929 | 0.0942  | -0.0621 | -0.0523 |
| 26STYR | R3 | 1704 | 12.224 | 7.736 | 5.038 | 0.0689  | -0.0323 | -0.0106 |
| 27STYR | B  | 1705 | 11.956 | 8.381 | 5.249 | 0.0072  | -0.0419 | -0.0852 |
| 27STYR | R1 | 1706 | 11.726 | 8.306 | 5.109 | 0.0108  | -0.0837 | -0.1208 |
| 27STYR | R2 | 1707 | 11.547 | 8.418 | 4.941 | 0.0239  | -0.0853 | -0.1359 |
| 27STYR | R3 | 1708 | 11.463 | 8.253 | 5.137 | 0.0077  | -0.0768 | -0.1357 |
| 28STYR | B  | 1709 | 12.145 | 8.511 | 5.338 | 0.0005  | -0.0423 | -0.0695 |
| 28STYR | R1 | 1710 | 12.061 | 8.277 | 5.460 | 0.0029  | -0.0446 | -0.0877 |
| 28STYR | R2 | 1711 | 11.983 | 8.175 | 5.697 | -0.0091 | -0.0297 | -0.0853 |
| 28STYR | R3 | 1712 | 12.150 | 8.034 | 5.538 | 0.0040  | -0.0369 | -0.0652 |
| 29STYR | B  | 1713 | 12.239 | 8.729 | 5.307 | -0.0134 | -0.0236 | -0.0757 |
| 29STYR | R1 | 1714 | 12.000 | 8.687 | 5.201 | 0.0150  | -0.0450 | -0.1135 |
| 29STYR | R2 | 1715 | 11.755 | 8.800 | 5.202 | 0.0026  | -0.0718 | -0.1320 |
| 29STYR | R3 | 1716 | 11.866 | 8.721 | 4.969 | 0.0252  | -0.0675 | -0.1227 |
| 30STYR | B  | 1717 | 12.283 | 8.892 | 5.139 | -0.0076 | -0.0232 | -0.0627 |
| 30STYR | R1 | 1718 | 12.391 | 8.948 | 5.367 | -0.0318 | -0.0111 | -0.0662 |
| 30STYR | R2 | 1719 | 12.617 | 9.011 | 5.501 | -0.0469 | 0.0068  | -0.0492 |
| 30STYR | R3 | 1720 | 12.399 | 9.170 | 5.521 | -0.0570 | -0.0038 | -0.0755 |
| 31STYR | B  | 1721 | 12.414 | 9.061 | 5.052 | -0.0137 | -0.0329 | -0.0723 |
| 31STYR | R1 | 1722 | 12.134 | 9.076 | 5.071 | -0.0093 | -0.0314 | -0.1118 |
| 31STYR | R2 | 1723 | 11.900 | 9.129 | 4.949 | -0.0086 | -0.0647 | -0.1276 |
| 31STYR | R3 | 1724 | 11.932 | 9.189 | 5.210 | -0.0297 | -0.0466 | -0.1291 |
| 32STYR | B  | 1725 | 12.475 | 9.235 | 4.888 | 0.0047  | -0.0292 | -0.0719 |
| 32STYR | R1 | 1726 | 12.545 | 9.000 | 4.817 | 0.0279  | -0.0322 | -0.0500 |
| 32STYR | R2 | 1727 | 12.513 | 8.850 | 4.594 | 0.0550  | -0.0347 | -0.0522 |
| 32STYR | R3 | 1728 | 12.759 | 8.885 | 4.700 | 0.0441  | -0.0213 | -0.0313 |
| 33STYR | B  | 1729 | 12.310 | 9.317 | 4.726 | 0.0144  | -0.0456 | -0.1076 |
| 33STYR | R1 | 1730 | 12.539 | 9.314 | 4.627 | 0.0255  | -0.0373 | -0.0644 |
| 33STYR | R2 | 1731 | 12.656 | 9.214 | 4.405 | 0.0567  | -0.0448 | -0.0445 |
| 33STYR | R3 | 1732 | 12.706 | 9.468 | 4.482 | 0.0325  | -0.0367 | -0.0556 |



|          |          |          |        |        |       |         |         |         |
|----------|----------|----------|--------|--------|-------|---------|---------|---------|
| 34STYR   | B        | 1733     | 12.154 | 9.195  | 4.606 | 0.0464  | -0.0563 | -0.1005 |
| 34STYR   | R1       | 1734     | 12.085 | 9.431  | 4.714 | -0.0146 | -0.0902 | -0.1305 |
| 34STYR   | R2       | 1735     | 11.950 | 9.660  | 4.668 | 0.0238  | -0.0708 | -0.1483 |
| 34STYR   | R3       | 1736     | 11.965 | 9.560  | 4.919 | -0.0124 | -0.0662 | -0.1442 |
| 35STYR   | B        | 1737     | 11.962 | 9.106  | 4.511 | 0.0496  | -0.0859 | -0.1317 |
| 35STYR   | R1       | 1738     | 12.191 | 9.118  | 4.368 | 0.0674  | -0.0837 | -0.0972 |
| 35STYR   | R2       | 1739     | 12.295 | 9.203  | 4.134 | 0.0900  | -0.0798 | -0.0858 |
| 35STYR   | R3       | 1740     | 12.342 | 8.951  | 4.219 | 0.1079  | -0.0713 | -0.0703 |
| 36STYR   | B        | 1741     | 11.747 | 9.009  | 4.552 | 0.0400  | -0.0866 | -0.1358 |
| 36STYR   | R1       | 1742     | 11.954 | 8.867  | 4.443 | 0.0692  | -0.0809 | -0.1155 |
| 36STYR   | R2       | 1743     | 12.144 | 8.677  | 4.470 | 0.0730  | -0.0727 | -0.0826 |
| 36STYR   | R3       | 1744     | 12.003 | 8.697  | 4.240 | 0.0996  | -0.0901 | -0.1005 |
| 37STYR   | B        | 1745     | 11.551 | 8.974  | 4.675 | 0.0472  | -0.0831 | -0.1555 |
| 37STYR   | R1       | 1746     | 11.663 | 8.766  | 4.568 | 0.0579  | -0.1052 | -0.1418 |
| 37STYR   | R2       | 1747     | 11.632 | 8.565  | 4.389 | 0.1077  | -0.1142 | -0.1405 |
| 37STYR   | R3       | 1748     | 11.776 | 8.525  | 4.614 | 0.0773  | -0.0914 | -0.1169 |
| 38STYR   | B        | 1749     | 11.443 | 8.870  | 4.872 | 0.0373  | -0.1016 | -0.1689 |
| 38STYR   | R1       | 1750     | 11.291 | 9.033  | 4.729 | 0.0278  | -0.1128 | -0.2049 |
| 38STYR   | R2       | 1751     | 11.137 | 9.254  | 4.752 | 0.0097  | -0.1224 | -0.2336 |
| 38STYR   | R3       | 1752     | 11.044 | 9.039  | 4.619 | 0.0368  | -0.1386 | -0.2265 |
| 39STYR   | B        | 1753     | 11.369 | 9.030  | 5.059 | -0.0034 | -0.0788 | -0.1730 |
| 39STYR   | R1       | 1754     | 11.331 | 8.769  | 5.107 | 0.0170  | -0.0851 | -0.1832 |
| 39STYR   | R2       | 1755     | 11.380 | 8.617  | 5.325 | -0.0070 | -0.0624 | -0.1619 |
| 39STYR   | R3       | 1756     | 11.153 | 8.581  | 5.183 | 0.0094  | -0.0784 | -0.1843 |
| 40STYR   | B        | 1757     | 11.498 | 9.243  | 5.100 | -0.0139 | -0.0597 | -0.2071 |
| 40STYR   | R1       | 1758     | 11.247 | 9.256  | 5.169 | -0.0282 | -0.0872 | -0.2238 |
| 40STYR   | R2       | 1759     | 11.089 | 9.324  | 5.376 | -0.0614 | -0.1025 | -0.2440 |
| 40STYR   | R3       | 1760     | 11.046 | 9.433  | 5.133 | -0.0286 | -0.0921 | -0.2452 |
| 41STYR   | B        | 1761     | 11.533 | 9.413  | 4.928 | -0.0106 | -0.0895 | -0.1924 |
| 41STYR   | R1       | 1762     | 11.611 | 9.478  | 5.181 | -0.0574 | -0.0722 | -0.1778 |
| 41STYR   | R2       | 1763     | 11.566 | 9.678  | 5.356 | -0.0824 | -0.0635 | -0.1941 |
| 41STYR   | R3       | 1764     | 11.814 | 9.576  | 5.329 | -0.0765 | -0.0582 | -0.1608 |
| 42STYR   | B        | 1765     | 11.570 | 9.441  | 4.684 | 0.0110  | -0.1151 | -0.1799 |
| 42STYR   | R1       | 1766     | 11.373 | 9.601  | 4.798 | -0.0209 | -0.1109 | -0.2141 |
| 42STYR   | R2       | 1767     | 11.115 | 9.668  | 4.754 | -0.0177 | -0.1170 | -0.2431 |
| 42STYR   | R3       | 1768     | 11.287 | 9.850  | 4.855 | -0.0284 | -0.1066 | -0.2435 |
| 43STYR   | B        | 1769     | 11.519 | 9.630  | 4.544 | 0.0113  | -0.0947 | -0.2002 |
| 43STYR   | R1       | 1770     | 11.661 | 9.454  | 4.421 | 0.0338  | -0.1050 | -0.1842 |
| 43STYR   | R2       | 1771     | 11.881 | 9.436  | 4.265 | 0.0641  | -0.0972 | -0.1425 |
| 43STYR   | R3       | 1772     | 11.654 | 9.309  | 4.193 | 0.0837  | -0.1094 | -0.1831 |
| 44STYR   | B        | 1773     | 11.497 | 9.721  | 4.331 | 0.0312  | -0.1241 | -0.2137 |
| 44STYR   | R1       | 1774     | 11.585 | 9.887  | 4.516 | 0.0005  | -0.0951 | -0.2191 |
| 44STYR   | R2       | 1775     | 11.521 | 10.130 | 4.615 | -0.0125 | -0.0978 | -0.2208 |
| 44STYR   | R3       | 1776     | 11.780 | 10.066 | 4.573 | -0.0080 | -0.0900 | -0.2052 |
| 45STYR   | B        | 1777     | 11.503 | 9.910  | 4.198 | 0.0314  | -0.1315 | -0.2134 |
| 45STYR   | R1       | 1778     | 11.277 | 9.872  | 4.311 | 0.0212  | -0.1218 | -0.2604 |
| 45STYR   | R2       | 1779     | 11.014 | 9.877  | 4.251 | 0.0245  | -0.1357 | -0.2761 |
| 45STYR   | R3       | 1780     | 11.105 | 10.008 | 4.468 | 0.0030  | -0.1397 | -0.2646 |
| 46STYR   | B        | 1781     | 11.473 | 9.993  | 3.985 | 0.0596  | -0.1531 | -0.2273 |
| 46STYR   | R1       | 1782     | 11.541 | 10.171 | 4.163 | 0.0312  | -0.1214 | -0.2160 |
| 46STYR   | R2       | 1783     | 11.460 | 10.404 | 4.272 | 0.0043  | -0.1190 | -0.2413 |
| 46STYR   | R3       | 1784     | 11.719 | 10.370 | 4.204 | 0.0167  | -0.1122 | -0.1975 |
| 47STYR   | B        | 1785     | 11.554 | 10.090 | 3.789 | 0.0708  | -0.1409 | -0.2349 |
| 47STYR   | R1       | 1786     | 11.286 | 10.034 | 3.825 | 0.0822  | -0.1386 | -0.2565 |
| 47STYR   | R2       | 1787     | 11.071 | 9.921  | 3.707 | 0.0968  | -0.1624 | -0.2606 |
| 47STYR   | R3       | 1788     | 11.039 | 10.136 | 3.867 | 0.0719  | -0.1566 | -0.2732 |
| 48STYR   | B        | 1789     | 11.709 | 10.257 | 3.724 | 0.0761  | -0.1251 | -0.2014 |
| 48STYR   | R1       | 1790     | 11.770 | 10.033 | 3.624 | 0.1113  | -0.1171 | -0.1963 |
| 48STYR   | R2       | 1791     | 11.838 | 9.913  | 3.392 | 0.1343  | -0.1305 | -0.1826 |
| 48STYR   | R3       | 1792     | 11.993 | 9.882  | 3.610 | 0.1059  | -0.1282 | -0.1620 |
| 49STYR   | B        | 1793     | 11.747 | 10.448 | 3.593 | 0.0802  | -0.1336 | -0.2101 |
| 49STYR   | R1       | 1794     | 11.501 | 10.411 | 3.707 | 0.0663  | -0.1381 | -0.2475 |
| 49STYR   | R2       | 1795     | 11.317 | 10.512 | 3.877 | 0.0384  | -0.1531 | -0.2688 |
| 49STYR   | R3       | 1796     | 11.244 | 10.432 | 3.630 | 0.0716  | -0.1691 | -0.2735 |
| 50STYR   | B        | 1797     | 11.929 | 10.574 | 3.495 | 0.0754  | -0.1323 | -0.1977 |
| 50STYR   | R1       | 1798     | 11.986 | 10.415 | 3.711 | 0.0596  | -0.1316 | -0.1785 |
| 50STYR   | R2       | 1799     | 12.099 | 10.426 | 3.956 | 0.0206  | -0.1092 | -0.1614 |
| 50STYR   | R3       | 1800     | 12.176 | 10.236 | 3.781 | 0.0736  | -0.1036 | -0.1443 |
| 18.00000 | 18.00000 | 18.00000 |        |        |       |         |         |         |

## 1.2 Polystyrene NP System Topology

```
#include "martini_v2.0_PEO_PS_CNP.itp"
#include "PS50.itp"
```

```
[ system ]
; name
POLYSTYRENE
```

```
[ molecules ]
; name          number
PS50            9
```

## 1.3 Polystyrene NP Topology

```
[ moleculetype ]
; molname nrexcl
PS50      3
```

```
[ atoms ]
; nr      type      resnr  residu    atom    cgnr      charge
  1      SCY          1   STYR      B         1    0.00000E+00
  2      STY          1   STYR     R1         2    0.00000E+00
  3      STY          1   STYR     R2         3    0.00000E+00
  4      STY          1   STYR     R3         4    0.00000E+00
  5      SCY          2   STYR      B         5    0.00000E+00
  6      STY          2   STYR     R1         6    0.00000E+00
  7      STY          2   STYR     R2         7    0.00000E+00
  8      STY          2   STYR     R3         8    0.00000E+00
  9      SCY          3   STYR      B         9    0.00000E+00
 10      STY          3   STYR     R1        10    0.00000E+00
 11      STY          3   STYR     R2        11    0.00000E+00
 12      STY          3   STYR     R3        12    0.00000E+00
 13      SCY          4   STYR      B        13    0.00000E+00
 14      STY          4   STYR     R1        14    0.00000E+00
 15      STY          4   STYR     R2        15    0.00000E+00
 16      STY          4   STYR     R3        16    0.00000E+00
 17      SCY          5   STYR      B        17    0.00000E+00
 18      STY          5   STYR     R1        18    0.00000E+00
 19      STY          5   STYR     R2        19    0.00000E+00
 20      STY          5   STYR     R3        20    0.00000E+00
 21      SCY          6   STYR      B        21    0.00000E+00
 22      STY          6   STYR     R1        22    0.00000E+00
 23      STY          6   STYR     R2        23    0.00000E+00
 24      STY          6   STYR     R3        24    0.00000E+00
 25      SCY          7   STYR      B        25    0.00000E+00
 26      STY          7   STYR     R1        26    0.00000E+00
 27      STY          7   STYR     R2        27    0.00000E+00
 28      STY          7   STYR     R3        28    0.00000E+00
 29      SCY          8   STYR      B        29    0.00000E+00
 30      STY          8   STYR     R1        30    0.00000E+00
 31      STY          8   STYR     R2        31    0.00000E+00
 32      STY          8   STYR     R3        32    0.00000E+00
 33      SCY          9   STYR      B        33    0.00000E+00
 34      STY          9   STYR     R1        34    0.00000E+00
 35      STY          9   STYR     R2        35    0.00000E+00
 36      STY          9   STYR     R3        36    0.00000E+00
 37      SCY         10   STYR      B        37    0.00000E+00
 38      STY         10   STYR     R1        38    0.00000E+00
 39      STY         10   STYR     R2        39    0.00000E+00
 40      STY         10   STYR     R3        40    0.00000E+00
 41      SCY         11   STYR      B        41    0.00000E+00
 42      STY         11   STYR     R1        42    0.00000E+00
 43      STY         11   STYR     R2        43    0.00000E+00
 44      STY         11   STYR     R3        44    0.00000E+00
 45      SCY         12   STYR      B        45    0.00000E+00
 46      STY         12   STYR     R1        46    0.00000E+00
 47      STY         12   STYR     R2        47    0.00000E+00
 48      STY         12   STYR     R3        48    0.00000E+00
 49      SCY         13   STYR      B        49    0.00000E+00
```

|     |     |    |      |    |     |             |
|-----|-----|----|------|----|-----|-------------|
| 50  | STY | 13 | STYR | R1 | 50  | 0.00000E+00 |
| 51  | STY | 13 | STYR | R2 | 51  | 0.00000E+00 |
| 52  | STY | 13 | STYR | R3 | 52  | 0.00000E+00 |
| 53  | SCY | 14 | STYR | B  | 53  | 0.00000E+00 |
| 54  | STY | 14 | STYR | R1 | 54  | 0.00000E+00 |
| 55  | STY | 14 | STYR | R2 | 55  | 0.00000E+00 |
| 56  | STY | 14 | STYR | R3 | 56  | 0.00000E+00 |
| 57  | SCY | 15 | STYR | B  | 57  | 0.00000E+00 |
| 58  | STY | 15 | STYR | R1 | 58  | 0.00000E+00 |
| 59  | STY | 15 | STYR | R2 | 59  | 0.00000E+00 |
| 60  | STY | 15 | STYR | R3 | 60  | 0.00000E+00 |
| 61  | SCY | 16 | STYR | B  | 61  | 0.00000E+00 |
| 62  | STY | 16 | STYR | R1 | 62  | 0.00000E+00 |
| 63  | STY | 16 | STYR | R2 | 63  | 0.00000E+00 |
| 64  | STY | 16 | STYR | R3 | 64  | 0.00000E+00 |
| 65  | SCY | 17 | STYR | B  | 65  | 0.00000E+00 |
| 66  | STY | 17 | STYR | R1 | 66  | 0.00000E+00 |
| 67  | STY | 17 | STYR | R2 | 67  | 0.00000E+00 |
| 68  | STY | 17 | STYR | R3 | 68  | 0.00000E+00 |
| 69  | SCY | 18 | STYR | B  | 69  | 0.00000E+00 |
| 70  | STY | 18 | STYR | R1 | 70  | 0.00000E+00 |
| 71  | STY | 18 | STYR | R2 | 71  | 0.00000E+00 |
| 72  | STY | 18 | STYR | R3 | 72  | 0.00000E+00 |
| 73  | SCY | 19 | STYR | B  | 73  | 0.00000E+00 |
| 74  | STY | 19 | STYR | R1 | 74  | 0.00000E+00 |
| 75  | STY | 19 | STYR | R2 | 75  | 0.00000E+00 |
| 76  | STY | 19 | STYR | R3 | 76  | 0.00000E+00 |
| 77  | SCY | 20 | STYR | B  | 77  | 0.00000E+00 |
| 78  | STY | 20 | STYR | R1 | 78  | 0.00000E+00 |
| 79  | STY | 20 | STYR | R2 | 79  | 0.00000E+00 |
| 80  | STY | 20 | STYR | R3 | 80  | 0.00000E+00 |
| 81  | SCY | 21 | STYR | B  | 81  | 0.00000E+00 |
| 82  | STY | 21 | STYR | R1 | 82  | 0.00000E+00 |
| 83  | STY | 21 | STYR | R2 | 83  | 0.00000E+00 |
| 84  | STY | 21 | STYR | R3 | 84  | 0.00000E+00 |
| 85  | SCY | 22 | STYR | B  | 85  | 0.00000E+00 |
| 86  | STY | 22 | STYR | R1 | 86  | 0.00000E+00 |
| 87  | STY | 22 | STYR | R2 | 87  | 0.00000E+00 |
| 88  | STY | 22 | STYR | R3 | 88  | 0.00000E+00 |
| 89  | SCY | 23 | STYR | B  | 89  | 0.00000E+00 |
| 90  | STY | 23 | STYR | R1 | 90  | 0.00000E+00 |
| 91  | STY | 23 | STYR | R2 | 91  | 0.00000E+00 |
| 92  | STY | 23 | STYR | R3 | 92  | 0.00000E+00 |
| 93  | SCY | 24 | STYR | B  | 93  | 0.00000E+00 |
| 94  | STY | 24 | STYR | R1 | 94  | 0.00000E+00 |
| 95  | STY | 24 | STYR | R2 | 95  | 0.00000E+00 |
| 96  | STY | 24 | STYR | R3 | 96  | 0.00000E+00 |
| 97  | SCY | 25 | STYR | B  | 97  | 0.00000E+00 |
| 98  | STY | 25 | STYR | R1 | 98  | 0.00000E+00 |
| 99  | STY | 25 | STYR | R2 | 99  | 0.00000E+00 |
| 100 | STY | 25 | STYR | R3 | 100 | 0.00000E+00 |
| 101 | SCY | 26 | STYR | B  | 101 | 0.00000E+00 |
| 102 | STY | 26 | STYR | R1 | 102 | 0.00000E+00 |
| 103 | STY | 26 | STYR | R2 | 103 | 0.00000E+00 |
| 104 | STY | 26 | STYR | R3 | 104 | 0.00000E+00 |
| 105 | SCY | 27 | STYR | B  | 105 | 0.00000E+00 |
| 106 | STY | 27 | STYR | R1 | 106 | 0.00000E+00 |
| 107 | STY | 27 | STYR | R2 | 107 | 0.00000E+00 |
| 108 | STY | 27 | STYR | R3 | 108 | 0.00000E+00 |
| 109 | SCY | 28 | STYR | B  | 109 | 0.00000E+00 |
| 110 | STY | 28 | STYR | R1 | 110 | 0.00000E+00 |
| 111 | STY | 28 | STYR | R2 | 111 | 0.00000E+00 |
| 112 | STY | 28 | STYR | R3 | 112 | 0.00000E+00 |
| 113 | SCY | 29 | STYR | B  | 113 | 0.00000E+00 |
| 114 | STY | 29 | STYR | R1 | 114 | 0.00000E+00 |
| 115 | STY | 29 | STYR | R2 | 115 | 0.00000E+00 |
| 116 | STY | 29 | STYR | R3 | 116 | 0.00000E+00 |
| 117 | SCY | 30 | STYR | B  | 117 | 0.00000E+00 |
| 118 | STY | 30 | STYR | R1 | 118 | 0.00000E+00 |
| 119 | STY | 30 | STYR | R2 | 119 | 0.00000E+00 |
| 120 | STY | 30 | STYR | R3 | 120 | 0.00000E+00 |
| 121 | SCY | 31 | STYR | B  | 121 | 0.00000E+00 |
| 122 | STY | 31 | STYR | R1 | 122 | 0.00000E+00 |

|     |     |    |      |    |     |             |
|-----|-----|----|------|----|-----|-------------|
| 123 | STY | 31 | STYR | R2 | 123 | 0.00000E+00 |
| 124 | STY | 31 | STYR | R3 | 124 | 0.00000E+00 |
| 125 | SCY | 32 | STYR | B  | 125 | 0.00000E+00 |
| 126 | STY | 32 | STYR | R1 | 126 | 0.00000E+00 |
| 127 | STY | 32 | STYR | R2 | 127 | 0.00000E+00 |
| 128 | STY | 32 | STYR | R3 | 128 | 0.00000E+00 |
| 129 | SCY | 33 | STYR | B  | 129 | 0.00000E+00 |
| 130 | STY | 33 | STYR | R1 | 130 | 0.00000E+00 |
| 131 | STY | 33 | STYR | R2 | 131 | 0.00000E+00 |
| 132 | STY | 33 | STYR | R3 | 132 | 0.00000E+00 |
| 133 | SCY | 34 | STYR | B  | 133 | 0.00000E+00 |
| 134 | STY | 34 | STYR | R1 | 134 | 0.00000E+00 |
| 135 | STY | 34 | STYR | R2 | 135 | 0.00000E+00 |
| 136 | STY | 34 | STYR | R3 | 136 | 0.00000E+00 |
| 137 | SCY | 35 | STYR | B  | 137 | 0.00000E+00 |
| 138 | STY | 35 | STYR | R1 | 138 | 0.00000E+00 |
| 139 | STY | 35 | STYR | R2 | 139 | 0.00000E+00 |
| 140 | STY | 35 | STYR | R3 | 140 | 0.00000E+00 |
| 141 | SCY | 36 | STYR | B  | 141 | 0.00000E+00 |
| 142 | STY | 36 | STYR | R1 | 142 | 0.00000E+00 |
| 143 | STY | 36 | STYR | R2 | 143 | 0.00000E+00 |
| 144 | STY | 36 | STYR | R3 | 144 | 0.00000E+00 |
| 145 | SCY | 37 | STYR | B  | 145 | 0.00000E+00 |
| 146 | STY | 37 | STYR | R1 | 146 | 0.00000E+00 |
| 147 | STY | 37 | STYR | R2 | 147 | 0.00000E+00 |
| 148 | STY | 37 | STYR | R3 | 148 | 0.00000E+00 |
| 149 | SCY | 38 | STYR | B  | 149 | 0.00000E+00 |
| 150 | STY | 38 | STYR | R1 | 150 | 0.00000E+00 |
| 151 | STY | 38 | STYR | R2 | 151 | 0.00000E+00 |
| 152 | STY | 38 | STYR | R3 | 152 | 0.00000E+00 |
| 153 | SCY | 39 | STYR | B  | 153 | 0.00000E+00 |
| 154 | STY | 39 | STYR | R1 | 154 | 0.00000E+00 |
| 155 | STY | 39 | STYR | R2 | 155 | 0.00000E+00 |
| 156 | STY | 39 | STYR | R3 | 156 | 0.00000E+00 |
| 157 | SCY | 40 | STYR | B  | 157 | 0.00000E+00 |
| 158 | STY | 40 | STYR | R1 | 158 | 0.00000E+00 |
| 159 | STY | 40 | STYR | R2 | 159 | 0.00000E+00 |
| 160 | STY | 40 | STYR | R3 | 160 | 0.00000E+00 |
| 161 | SCY | 41 | STYR | B  | 161 | 0.00000E+00 |
| 162 | STY | 41 | STYR | R1 | 162 | 0.00000E+00 |
| 163 | STY | 41 | STYR | R2 | 163 | 0.00000E+00 |
| 164 | STY | 41 | STYR | R3 | 164 | 0.00000E+00 |
| 165 | SCY | 42 | STYR | B  | 165 | 0.00000E+00 |
| 166 | STY | 42 | STYR | R1 | 166 | 0.00000E+00 |
| 167 | STY | 42 | STYR | R2 | 167 | 0.00000E+00 |
| 168 | STY | 42 | STYR | R3 | 168 | 0.00000E+00 |
| 169 | SCY | 43 | STYR | B  | 169 | 0.00000E+00 |
| 170 | STY | 43 | STYR | R1 | 170 | 0.00000E+00 |
| 171 | STY | 43 | STYR | R2 | 171 | 0.00000E+00 |
| 172 | STY | 43 | STYR | R3 | 172 | 0.00000E+00 |
| 173 | SCY | 44 | STYR | B  | 173 | 0.00000E+00 |
| 174 | STY | 44 | STYR | R1 | 174 | 0.00000E+00 |
| 175 | STY | 44 | STYR | R2 | 175 | 0.00000E+00 |
| 176 | STY | 44 | STYR | R3 | 176 | 0.00000E+00 |
| 177 | SCY | 45 | STYR | B  | 177 | 0.00000E+00 |
| 178 | STY | 45 | STYR | R1 | 178 | 0.00000E+00 |
| 179 | STY | 45 | STYR | R2 | 179 | 0.00000E+00 |
| 180 | STY | 45 | STYR | R3 | 180 | 0.00000E+00 |
| 181 | SCY | 46 | STYR | B  | 181 | 0.00000E+00 |
| 182 | STY | 46 | STYR | R1 | 182 | 0.00000E+00 |
| 183 | STY | 46 | STYR | R2 | 183 | 0.00000E+00 |
| 184 | STY | 46 | STYR | R3 | 184 | 0.00000E+00 |
| 185 | SCY | 47 | STYR | B  | 185 | 0.00000E+00 |
| 186 | STY | 47 | STYR | R1 | 186 | 0.00000E+00 |
| 187 | STY | 47 | STYR | R2 | 187 | 0.00000E+00 |
| 188 | STY | 47 | STYR | R3 | 188 | 0.00000E+00 |
| 189 | SCY | 48 | STYR | B  | 189 | 0.00000E+00 |
| 190 | STY | 48 | STYR | R1 | 190 | 0.00000E+00 |
| 191 | STY | 48 | STYR | R2 | 191 | 0.00000E+00 |
| 192 | STY | 48 | STYR | R3 | 192 | 0.00000E+00 |
| 193 | SCY | 49 | STYR | B  | 193 | 0.00000E+00 |
| 194 | STY | 49 | STYR | R1 | 194 | 0.00000E+00 |
| 195 | STY | 49 | STYR | R2 | 195 | 0.00000E+00 |

|     |     |    |      |    |     |             |
|-----|-----|----|------|----|-----|-------------|
| 196 | STY | 49 | STYR | R3 | 196 | 0.00000E+00 |
| 197 | SCY | 50 | STYR | B  | 197 | 0.00000E+00 |
| 198 | STY | 50 | STYR | R1 | 198 | 0.00000E+00 |
| 199 | STY | 50 | STYR | R2 | 199 | 0.00000E+00 |
| 200 | STY | 50 | STYR | R3 | 200 | 0.00000E+00 |

[ bonds ]

| ; ai | aj  | funct |          |             |
|------|-----|-------|----------|-------------|
| 1    | 2   | 1     | 0.270000 | 8000.000000 |
| 1    | 6   | 1     | 0.270000 | 8000.000000 |
| 5    | 6   | 1     | 0.270000 | 8000.000000 |
| 5    | 10  | 1     | 0.270000 | 8000.000000 |
| 9    | 10  | 1     | 0.270000 | 8000.000000 |
| 9    | 14  | 1     | 0.270000 | 8000.000000 |
| 13   | 14  | 1     | 0.270000 | 8000.000000 |
| 13   | 18  | 1     | 0.270000 | 8000.000000 |
| 17   | 18  | 1     | 0.270000 | 8000.000000 |
| 17   | 22  | 1     | 0.270000 | 8000.000000 |
| 21   | 22  | 1     | 0.270000 | 8000.000000 |
| 21   | 26  | 1     | 0.270000 | 8000.000000 |
| 25   | 26  | 1     | 0.270000 | 8000.000000 |
| 25   | 30  | 1     | 0.270000 | 8000.000000 |
| 29   | 30  | 1     | 0.270000 | 8000.000000 |
| 29   | 34  | 1     | 0.270000 | 8000.000000 |
| 33   | 34  | 1     | 0.270000 | 8000.000000 |
| 33   | 38  | 1     | 0.270000 | 8000.000000 |
| 37   | 38  | 1     | 0.270000 | 8000.000000 |
| 37   | 42  | 1     | 0.270000 | 8000.000000 |
| 41   | 42  | 1     | 0.270000 | 8000.000000 |
| 41   | 46  | 1     | 0.270000 | 8000.000000 |
| 45   | 46  | 1     | 0.270000 | 8000.000000 |
| 45   | 50  | 1     | 0.270000 | 8000.000000 |
| 49   | 50  | 1     | 0.270000 | 8000.000000 |
| 49   | 54  | 1     | 0.270000 | 8000.000000 |
| 53   | 54  | 1     | 0.270000 | 8000.000000 |
| 53   | 58  | 1     | 0.270000 | 8000.000000 |
| 57   | 58  | 1     | 0.270000 | 8000.000000 |
| 57   | 62  | 1     | 0.270000 | 8000.000000 |
| 61   | 62  | 1     | 0.270000 | 8000.000000 |
| 61   | 66  | 1     | 0.270000 | 8000.000000 |
| 65   | 66  | 1     | 0.270000 | 8000.000000 |
| 65   | 70  | 1     | 0.270000 | 8000.000000 |
| 69   | 70  | 1     | 0.270000 | 8000.000000 |
| 69   | 74  | 1     | 0.270000 | 8000.000000 |
| 73   | 74  | 1     | 0.270000 | 8000.000000 |
| 73   | 78  | 1     | 0.270000 | 8000.000000 |
| 77   | 78  | 1     | 0.270000 | 8000.000000 |
| 77   | 82  | 1     | 0.270000 | 8000.000000 |
| 81   | 82  | 1     | 0.270000 | 8000.000000 |
| 81   | 86  | 1     | 0.270000 | 8000.000000 |
| 85   | 86  | 1     | 0.270000 | 8000.000000 |
| 85   | 90  | 1     | 0.270000 | 8000.000000 |
| 89   | 90  | 1     | 0.270000 | 8000.000000 |
| 89   | 94  | 1     | 0.270000 | 8000.000000 |
| 93   | 94  | 1     | 0.270000 | 8000.000000 |
| 93   | 98  | 1     | 0.270000 | 8000.000000 |
| 97   | 98  | 1     | 0.270000 | 8000.000000 |
| 97   | 102 | 1     | 0.270000 | 8000.000000 |
| 101  | 102 | 1     | 0.270000 | 8000.000000 |
| 101  | 106 | 1     | 0.270000 | 8000.000000 |
| 105  | 106 | 1     | 0.270000 | 8000.000000 |
| 105  | 110 | 1     | 0.270000 | 8000.000000 |
| 109  | 110 | 1     | 0.270000 | 8000.000000 |
| 109  | 114 | 1     | 0.270000 | 8000.000000 |
| 113  | 114 | 1     | 0.270000 | 8000.000000 |
| 113  | 118 | 1     | 0.270000 | 8000.000000 |
| 117  | 118 | 1     | 0.270000 | 8000.000000 |
| 117  | 122 | 1     | 0.270000 | 8000.000000 |
| 121  | 122 | 1     | 0.270000 | 8000.000000 |
| 121  | 126 | 1     | 0.270000 | 8000.000000 |
| 125  | 126 | 1     | 0.270000 | 8000.000000 |
| 125  | 130 | 1     | 0.270000 | 8000.000000 |

|     |     |   |          |             |
|-----|-----|---|----------|-------------|
| 129 | 130 | 1 | 0.270000 | 8000.000000 |
| 129 | 134 | 1 | 0.270000 | 8000.000000 |
| 133 | 134 | 1 | 0.270000 | 8000.000000 |
| 133 | 138 | 1 | 0.270000 | 8000.000000 |
| 137 | 138 | 1 | 0.270000 | 8000.000000 |
| 137 | 142 | 1 | 0.270000 | 8000.000000 |
| 141 | 142 | 1 | 0.270000 | 8000.000000 |
| 141 | 146 | 1 | 0.270000 | 8000.000000 |
| 145 | 146 | 1 | 0.270000 | 8000.000000 |
| 145 | 150 | 1 | 0.270000 | 8000.000000 |
| 149 | 150 | 1 | 0.270000 | 8000.000000 |
| 149 | 154 | 1 | 0.270000 | 8000.000000 |
| 153 | 154 | 1 | 0.270000 | 8000.000000 |
| 153 | 158 | 1 | 0.270000 | 8000.000000 |
| 157 | 158 | 1 | 0.270000 | 8000.000000 |
| 157 | 162 | 1 | 0.270000 | 8000.000000 |
| 161 | 162 | 1 | 0.270000 | 8000.000000 |
| 161 | 166 | 1 | 0.270000 | 8000.000000 |
| 165 | 166 | 1 | 0.270000 | 8000.000000 |
| 165 | 170 | 1 | 0.270000 | 8000.000000 |
| 169 | 170 | 1 | 0.270000 | 8000.000000 |
| 169 | 174 | 1 | 0.270000 | 8000.000000 |
| 173 | 174 | 1 | 0.270000 | 8000.000000 |
| 173 | 178 | 1 | 0.270000 | 8000.000000 |
| 177 | 178 | 1 | 0.270000 | 8000.000000 |
| 177 | 182 | 1 | 0.270000 | 8000.000000 |
| 181 | 182 | 1 | 0.270000 | 8000.000000 |
| 181 | 186 | 1 | 0.270000 | 8000.000000 |
| 185 | 186 | 1 | 0.270000 | 8000.000000 |
| 185 | 190 | 1 | 0.270000 | 8000.000000 |
| 189 | 190 | 1 | 0.270000 | 8000.000000 |
| 189 | 194 | 1 | 0.270000 | 8000.000000 |
| 193 | 194 | 1 | 0.270000 | 8000.000000 |
| 193 | 198 | 1 | 0.270000 | 8000.000000 |
| 197 | 198 | 1 | 0.270000 | 8000.000000 |

[ constraints ]

| ; ai | aj | funct | length   |
|------|----|-------|----------|
| 2    | 3  | 1     | 0.270000 |
| 3    | 4  | 1     | 0.270000 |
| 4    | 2  | 1     | 0.270000 |
| 6    | 7  | 1     | 0.270000 |
| 7    | 8  | 1     | 0.270000 |
| 8    | 6  | 1     | 0.270000 |
| 10   | 11 | 1     | 0.270000 |
| 11   | 12 | 1     | 0.270000 |
| 12   | 10 | 1     | 0.270000 |
| 14   | 15 | 1     | 0.270000 |
| 15   | 16 | 1     | 0.270000 |
| 16   | 14 | 1     | 0.270000 |
| 18   | 19 | 1     | 0.270000 |
| 19   | 20 | 1     | 0.270000 |
| 20   | 18 | 1     | 0.270000 |
| 22   | 23 | 1     | 0.270000 |
| 23   | 24 | 1     | 0.270000 |
| 24   | 22 | 1     | 0.270000 |
| 26   | 27 | 1     | 0.270000 |
| 27   | 28 | 1     | 0.270000 |
| 28   | 26 | 1     | 0.270000 |
| 30   | 31 | 1     | 0.270000 |
| 31   | 32 | 1     | 0.270000 |
| 32   | 30 | 1     | 0.270000 |
| 34   | 35 | 1     | 0.270000 |
| 35   | 36 | 1     | 0.270000 |
| 36   | 34 | 1     | 0.270000 |
| 38   | 39 | 1     | 0.270000 |
| 39   | 40 | 1     | 0.270000 |
| 40   | 38 | 1     | 0.270000 |
| 42   | 43 | 1     | 0.270000 |
| 43   | 44 | 1     | 0.270000 |
| 44   | 42 | 1     | 0.270000 |
| 46   | 47 | 1     | 0.270000 |

|     |     |   |          |
|-----|-----|---|----------|
| 47  | 48  | 1 | 0.270000 |
| 48  | 46  | 1 | 0.270000 |
| 50  | 51  | 1 | 0.270000 |
| 51  | 52  | 1 | 0.270000 |
| 52  | 50  | 1 | 0.270000 |
| 54  | 55  | 1 | 0.270000 |
| 55  | 56  | 1 | 0.270000 |
| 56  | 54  | 1 | 0.270000 |
| 58  | 59  | 1 | 0.270000 |
| 59  | 60  | 1 | 0.270000 |
| 60  | 58  | 1 | 0.270000 |
| 62  | 63  | 1 | 0.270000 |
| 63  | 64  | 1 | 0.270000 |
| 64  | 62  | 1 | 0.270000 |
| 66  | 67  | 1 | 0.270000 |
| 67  | 68  | 1 | 0.270000 |
| 68  | 66  | 1 | 0.270000 |
| 70  | 71  | 1 | 0.270000 |
| 71  | 72  | 1 | 0.270000 |
| 72  | 70  | 1 | 0.270000 |
| 74  | 75  | 1 | 0.270000 |
| 75  | 76  | 1 | 0.270000 |
| 76  | 74  | 1 | 0.270000 |
| 78  | 79  | 1 | 0.270000 |
| 79  | 80  | 1 | 0.270000 |
| 80  | 78  | 1 | 0.270000 |
| 82  | 83  | 1 | 0.270000 |
| 83  | 84  | 1 | 0.270000 |
| 84  | 82  | 1 | 0.270000 |
| 86  | 87  | 1 | 0.270000 |
| 87  | 88  | 1 | 0.270000 |
| 88  | 86  | 1 | 0.270000 |
| 90  | 91  | 1 | 0.270000 |
| 91  | 92  | 1 | 0.270000 |
| 92  | 90  | 1 | 0.270000 |
| 94  | 95  | 1 | 0.270000 |
| 95  | 96  | 1 | 0.270000 |
| 96  | 94  | 1 | 0.270000 |
| 98  | 99  | 1 | 0.270000 |
| 99  | 100 | 1 | 0.270000 |
| 100 | 98  | 1 | 0.270000 |
| 102 | 103 | 1 | 0.270000 |
| 103 | 104 | 1 | 0.270000 |
| 104 | 102 | 1 | 0.270000 |
| 106 | 107 | 1 | 0.270000 |
| 107 | 108 | 1 | 0.270000 |
| 108 | 106 | 1 | 0.270000 |
| 110 | 111 | 1 | 0.270000 |
| 111 | 112 | 1 | 0.270000 |
| 112 | 110 | 1 | 0.270000 |
| 114 | 115 | 1 | 0.270000 |
| 115 | 116 | 1 | 0.270000 |
| 116 | 114 | 1 | 0.270000 |
| 118 | 119 | 1 | 0.270000 |
| 119 | 120 | 1 | 0.270000 |
| 120 | 118 | 1 | 0.270000 |
| 122 | 123 | 1 | 0.270000 |
| 123 | 124 | 1 | 0.270000 |
| 124 | 122 | 1 | 0.270000 |
| 126 | 127 | 1 | 0.270000 |
| 127 | 128 | 1 | 0.270000 |
| 128 | 126 | 1 | 0.270000 |
| 130 | 131 | 1 | 0.270000 |
| 131 | 132 | 1 | 0.270000 |
| 132 | 130 | 1 | 0.270000 |
| 134 | 135 | 1 | 0.270000 |
| 135 | 136 | 1 | 0.270000 |
| 136 | 134 | 1 | 0.270000 |
| 138 | 139 | 1 | 0.270000 |
| 139 | 140 | 1 | 0.270000 |
| 140 | 138 | 1 | 0.270000 |
| 142 | 143 | 1 | 0.270000 |
| 143 | 144 | 1 | 0.270000 |

|     |     |   |          |
|-----|-----|---|----------|
| 144 | 142 | 1 | 0.270000 |
| 146 | 147 | 1 | 0.270000 |
| 147 | 148 | 1 | 0.270000 |
| 148 | 146 | 1 | 0.270000 |
| 150 | 151 | 1 | 0.270000 |
| 151 | 152 | 1 | 0.270000 |
| 152 | 150 | 1 | 0.270000 |
| 154 | 155 | 1 | 0.270000 |
| 155 | 156 | 1 | 0.270000 |
| 156 | 154 | 1 | 0.270000 |
| 158 | 159 | 1 | 0.270000 |
| 159 | 160 | 1 | 0.270000 |
| 160 | 158 | 1 | 0.270000 |
| 162 | 163 | 1 | 0.270000 |
| 163 | 164 | 1 | 0.270000 |
| 164 | 162 | 1 | 0.270000 |
| 166 | 167 | 1 | 0.270000 |
| 167 | 168 | 1 | 0.270000 |
| 168 | 166 | 1 | 0.270000 |
| 170 | 171 | 1 | 0.270000 |
| 171 | 172 | 1 | 0.270000 |
| 172 | 170 | 1 | 0.270000 |
| 174 | 175 | 1 | 0.270000 |
| 175 | 176 | 1 | 0.270000 |
| 176 | 174 | 1 | 0.270000 |
| 178 | 179 | 1 | 0.270000 |
| 179 | 180 | 1 | 0.270000 |
| 180 | 178 | 1 | 0.270000 |
| 182 | 183 | 1 | 0.270000 |
| 183 | 184 | 1 | 0.270000 |
| 184 | 182 | 1 | 0.270000 |
| 186 | 187 | 1 | 0.270000 |
| 187 | 188 | 1 | 0.270000 |
| 188 | 186 | 1 | 0.270000 |
| 190 | 191 | 1 | 0.270000 |
| 191 | 192 | 1 | 0.270000 |
| 192 | 190 | 1 | 0.270000 |
| 194 | 195 | 1 | 0.270000 |
| 195 | 196 | 1 | 0.270000 |
| 196 | 194 | 1 | 0.270000 |
| 198 | 199 | 1 | 0.270000 |
| 199 | 200 | 1 | 0.270000 |
| 200 | 198 | 1 | 0.270000 |

[ angles ]

| ; ai | aj | ak | funct |            |            |
|------|----|----|-------|------------|------------|
| 1    | 2  | 3  | 1     | 136.000000 | 100.000000 |
| 1    | 2  | 4  | 1     | 136.000000 | 100.000000 |
| 1    | 6  | 7  | 1     | 136.000000 | 100.000000 |
| 1    | 6  | 8  | 1     | 136.000000 | 100.000000 |
| 2    | 1  | 6  | 1     | 120.000000 | 25.000000  |
| 1    | 6  | 5  | 1     | 52.000000  | 550.000000 |
| 5    | 6  | 7  | 1     | 136.000000 | 100.000000 |
| 5    | 6  | 8  | 1     | 136.000000 | 100.000000 |
| 5    | 10 | 11 | 1     | 136.000000 | 100.000000 |
| 5    | 10 | 12 | 1     | 136.000000 | 100.000000 |
| 6    | 5  | 10 | 1     | 120.000000 | 25.000000  |
| 5    | 10 | 9  | 1     | 52.000000  | 550.000000 |
| 9    | 10 | 11 | 1     | 136.000000 | 100.000000 |
| 9    | 10 | 12 | 1     | 136.000000 | 100.000000 |
| 9    | 14 | 15 | 1     | 136.000000 | 100.000000 |
| 9    | 14 | 16 | 1     | 136.000000 | 100.000000 |
| 10   | 9  | 14 | 1     | 120.000000 | 25.000000  |
| 9    | 14 | 13 | 1     | 52.000000  | 550.000000 |
| 13   | 14 | 15 | 1     | 136.000000 | 100.000000 |
| 13   | 14 | 16 | 1     | 136.000000 | 100.000000 |
| 13   | 18 | 19 | 1     | 136.000000 | 100.000000 |
| 13   | 18 | 20 | 1     | 136.000000 | 100.000000 |
| 14   | 13 | 18 | 1     | 120.000000 | 25.000000  |
| 13   | 18 | 17 | 1     | 52.000000  | 550.000000 |
| 17   | 18 | 19 | 1     | 136.000000 | 100.000000 |
| 17   | 18 | 20 | 1     | 136.000000 | 100.000000 |



|    |    |    |   |            |            |
|----|----|----|---|------------|------------|
| 17 | 22 | 23 | 1 | 136.000000 | 100.000000 |
| 17 | 22 | 24 | 1 | 136.000000 | 100.000000 |
| 18 | 17 | 22 | 1 | 120.000000 | 25.000000  |
| 17 | 22 | 21 | 1 | 52.000000  | 550.000000 |
| 21 | 22 | 23 | 1 | 136.000000 | 100.000000 |
| 21 | 22 | 24 | 1 | 136.000000 | 100.000000 |
| 21 | 26 | 27 | 1 | 136.000000 | 100.000000 |
| 21 | 26 | 28 | 1 | 136.000000 | 100.000000 |
| 22 | 21 | 26 | 1 | 120.000000 | 25.000000  |
| 21 | 26 | 25 | 1 | 52.000000  | 550.000000 |
| 25 | 26 | 27 | 1 | 136.000000 | 100.000000 |
| 25 | 26 | 28 | 1 | 136.000000 | 100.000000 |
| 25 | 30 | 31 | 1 | 136.000000 | 100.000000 |
| 25 | 30 | 32 | 1 | 136.000000 | 100.000000 |
| 26 | 25 | 30 | 1 | 120.000000 | 25.000000  |
| 25 | 30 | 29 | 1 | 52.000000  | 550.000000 |
| 29 | 30 | 31 | 1 | 136.000000 | 100.000000 |
| 29 | 30 | 32 | 1 | 136.000000 | 100.000000 |
| 29 | 34 | 35 | 1 | 136.000000 | 100.000000 |
| 29 | 34 | 36 | 1 | 136.000000 | 100.000000 |
| 30 | 29 | 34 | 1 | 120.000000 | 25.000000  |
| 29 | 34 | 33 | 1 | 52.000000  | 550.000000 |
| 33 | 34 | 35 | 1 | 136.000000 | 100.000000 |
| 33 | 34 | 36 | 1 | 136.000000 | 100.000000 |
| 33 | 38 | 39 | 1 | 136.000000 | 100.000000 |
| 33 | 38 | 40 | 1 | 136.000000 | 100.000000 |
| 34 | 33 | 38 | 1 | 120.000000 | 25.000000  |
| 33 | 38 | 37 | 1 | 52.000000  | 550.000000 |
| 37 | 38 | 39 | 1 | 136.000000 | 100.000000 |
| 37 | 38 | 40 | 1 | 136.000000 | 100.000000 |
| 37 | 42 | 43 | 1 | 136.000000 | 100.000000 |
| 37 | 42 | 44 | 1 | 136.000000 | 100.000000 |
| 38 | 37 | 42 | 1 | 120.000000 | 25.000000  |
| 37 | 42 | 41 | 1 | 52.000000  | 550.000000 |
| 41 | 42 | 43 | 1 | 136.000000 | 100.000000 |
| 41 | 42 | 44 | 1 | 136.000000 | 100.000000 |
| 41 | 46 | 47 | 1 | 136.000000 | 100.000000 |
| 41 | 46 | 48 | 1 | 136.000000 | 100.000000 |
| 42 | 41 | 46 | 1 | 120.000000 | 25.000000  |
| 41 | 46 | 45 | 1 | 52.000000  | 550.000000 |
| 45 | 46 | 47 | 1 | 136.000000 | 100.000000 |
| 45 | 46 | 48 | 1 | 136.000000 | 100.000000 |
| 45 | 50 | 51 | 1 | 136.000000 | 100.000000 |
| 45 | 50 | 52 | 1 | 136.000000 | 100.000000 |
| 46 | 45 | 50 | 1 | 120.000000 | 25.000000  |
| 45 | 50 | 49 | 1 | 52.000000  | 550.000000 |
| 49 | 50 | 51 | 1 | 136.000000 | 100.000000 |
| 49 | 50 | 52 | 1 | 136.000000 | 100.000000 |
| 49 | 54 | 55 | 1 | 136.000000 | 100.000000 |
| 49 | 54 | 56 | 1 | 136.000000 | 100.000000 |
| 50 | 49 | 54 | 1 | 120.000000 | 25.000000  |
| 49 | 54 | 53 | 1 | 52.000000  | 550.000000 |
| 53 | 54 | 55 | 1 | 136.000000 | 100.000000 |
| 53 | 54 | 56 | 1 | 136.000000 | 100.000000 |
| 53 | 58 | 59 | 1 | 136.000000 | 100.000000 |
| 53 | 58 | 60 | 1 | 136.000000 | 100.000000 |
| 54 | 53 | 58 | 1 | 120.000000 | 25.000000  |
| 53 | 58 | 57 | 1 | 52.000000  | 550.000000 |
| 57 | 58 | 59 | 1 | 136.000000 | 100.000000 |
| 57 | 58 | 60 | 1 | 136.000000 | 100.000000 |
| 57 | 62 | 63 | 1 | 136.000000 | 100.000000 |
| 57 | 62 | 64 | 1 | 136.000000 | 100.000000 |
| 58 | 57 | 62 | 1 | 120.000000 | 25.000000  |
| 57 | 62 | 61 | 1 | 52.000000  | 550.000000 |
| 61 | 62 | 63 | 1 | 136.000000 | 100.000000 |
| 61 | 62 | 64 | 1 | 136.000000 | 100.000000 |
| 61 | 66 | 67 | 1 | 136.000000 | 100.000000 |
| 61 | 66 | 68 | 1 | 136.000000 | 100.000000 |
| 62 | 61 | 66 | 1 | 120.000000 | 25.000000  |
| 61 | 66 | 65 | 1 | 52.000000  | 550.000000 |
| 65 | 66 | 67 | 1 | 136.000000 | 100.000000 |
| 65 | 66 | 68 | 1 | 136.000000 | 100.000000 |
| 65 | 70 | 71 | 1 | 136.000000 | 100.000000 |

|     |     |     |   |            |            |
|-----|-----|-----|---|------------|------------|
| 65  | 70  | 72  | 1 | 136.000000 | 100.000000 |
| 66  | 65  | 70  | 1 | 120.000000 | 25.000000  |
| 65  | 70  | 69  | 1 | 52.000000  | 550.000000 |
| 69  | 70  | 71  | 1 | 136.000000 | 100.000000 |
| 69  | 70  | 72  | 1 | 136.000000 | 100.000000 |
| 69  | 74  | 75  | 1 | 136.000000 | 100.000000 |
| 69  | 74  | 76  | 1 | 136.000000 | 100.000000 |
| 70  | 69  | 74  | 1 | 120.000000 | 25.000000  |
| 69  | 74  | 73  | 1 | 52.000000  | 550.000000 |
| 73  | 74  | 75  | 1 | 136.000000 | 100.000000 |
| 73  | 74  | 76  | 1 | 136.000000 | 100.000000 |
| 73  | 78  | 79  | 1 | 136.000000 | 100.000000 |
| 73  | 78  | 80  | 1 | 136.000000 | 100.000000 |
| 74  | 73  | 78  | 1 | 120.000000 | 25.000000  |
| 73  | 78  | 77  | 1 | 52.000000  | 550.000000 |
| 77  | 78  | 79  | 1 | 136.000000 | 100.000000 |
| 77  | 78  | 80  | 1 | 136.000000 | 100.000000 |
| 77  | 82  | 83  | 1 | 136.000000 | 100.000000 |
| 77  | 82  | 84  | 1 | 136.000000 | 100.000000 |
| 78  | 77  | 82  | 1 | 120.000000 | 25.000000  |
| 77  | 82  | 81  | 1 | 52.000000  | 550.000000 |
| 81  | 82  | 83  | 1 | 136.000000 | 100.000000 |
| 81  | 82  | 84  | 1 | 136.000000 | 100.000000 |
| 81  | 86  | 87  | 1 | 136.000000 | 100.000000 |
| 81  | 86  | 88  | 1 | 136.000000 | 100.000000 |
| 82  | 81  | 86  | 1 | 120.000000 | 25.000000  |
| 81  | 86  | 85  | 1 | 52.000000  | 550.000000 |
| 85  | 86  | 87  | 1 | 136.000000 | 100.000000 |
| 85  | 86  | 88  | 1 | 136.000000 | 100.000000 |
| 85  | 90  | 91  | 1 | 136.000000 | 100.000000 |
| 85  | 90  | 92  | 1 | 136.000000 | 100.000000 |
| 86  | 85  | 90  | 1 | 120.000000 | 25.000000  |
| 85  | 90  | 89  | 1 | 52.000000  | 550.000000 |
| 89  | 90  | 91  | 1 | 136.000000 | 100.000000 |
| 89  | 90  | 92  | 1 | 136.000000 | 100.000000 |
| 89  | 94  | 95  | 1 | 136.000000 | 100.000000 |
| 89  | 94  | 96  | 1 | 136.000000 | 100.000000 |
| 90  | 89  | 94  | 1 | 120.000000 | 25.000000  |
| 89  | 94  | 93  | 1 | 52.000000  | 550.000000 |
| 93  | 94  | 95  | 1 | 136.000000 | 100.000000 |
| 93  | 94  | 96  | 1 | 136.000000 | 100.000000 |
| 93  | 98  | 99  | 1 | 136.000000 | 100.000000 |
| 93  | 98  | 100 | 1 | 136.000000 | 100.000000 |
| 94  | 93  | 98  | 1 | 120.000000 | 25.000000  |
| 93  | 98  | 97  | 1 | 52.000000  | 550.000000 |
| 97  | 98  | 99  | 1 | 136.000000 | 100.000000 |
| 97  | 98  | 100 | 1 | 136.000000 | 100.000000 |
| 97  | 102 | 103 | 1 | 136.000000 | 100.000000 |
| 97  | 102 | 104 | 1 | 136.000000 | 100.000000 |
| 98  | 97  | 102 | 1 | 120.000000 | 25.000000  |
| 97  | 102 | 101 | 1 | 52.000000  | 550.000000 |
| 101 | 102 | 103 | 1 | 136.000000 | 100.000000 |
| 101 | 102 | 104 | 1 | 136.000000 | 100.000000 |
| 101 | 106 | 107 | 1 | 136.000000 | 100.000000 |
| 101 | 106 | 108 | 1 | 136.000000 | 100.000000 |
| 102 | 101 | 106 | 1 | 120.000000 | 25.000000  |
| 101 | 106 | 105 | 1 | 52.000000  | 550.000000 |
| 105 | 106 | 107 | 1 | 136.000000 | 100.000000 |
| 105 | 106 | 108 | 1 | 136.000000 | 100.000000 |
| 105 | 110 | 111 | 1 | 136.000000 | 100.000000 |
| 105 | 110 | 112 | 1 | 136.000000 | 100.000000 |
| 106 | 105 | 110 | 1 | 120.000000 | 25.000000  |
| 105 | 110 | 109 | 1 | 52.000000  | 550.000000 |
| 109 | 110 | 111 | 1 | 136.000000 | 100.000000 |
| 109 | 110 | 112 | 1 | 136.000000 | 100.000000 |
| 109 | 114 | 115 | 1 | 136.000000 | 100.000000 |
| 109 | 114 | 116 | 1 | 136.000000 | 100.000000 |
| 110 | 109 | 114 | 1 | 120.000000 | 25.000000  |
| 109 | 114 | 113 | 1 | 52.000000  | 550.000000 |
| 113 | 114 | 115 | 1 | 136.000000 | 100.000000 |
| 113 | 114 | 116 | 1 | 136.000000 | 100.000000 |
| 113 | 118 | 119 | 1 | 136.000000 | 100.000000 |
| 113 | 118 | 120 | 1 | 136.000000 | 100.000000 |

|     |     |     |   |            |            |
|-----|-----|-----|---|------------|------------|
| 114 | 113 | 118 | 1 | 120.000000 | 25.000000  |
| 113 | 118 | 117 | 1 | 52.000000  | 550.000000 |
| 117 | 118 | 119 | 1 | 136.000000 | 100.000000 |
| 117 | 118 | 120 | 1 | 136.000000 | 100.000000 |
| 117 | 122 | 123 | 1 | 136.000000 | 100.000000 |
| 117 | 122 | 124 | 1 | 136.000000 | 100.000000 |
| 118 | 117 | 122 | 1 | 120.000000 | 25.000000  |
| 117 | 122 | 121 | 1 | 52.000000  | 550.000000 |
| 121 | 122 | 123 | 1 | 136.000000 | 100.000000 |
| 121 | 122 | 124 | 1 | 136.000000 | 100.000000 |
| 121 | 126 | 127 | 1 | 136.000000 | 100.000000 |
| 121 | 126 | 128 | 1 | 136.000000 | 100.000000 |
| 122 | 121 | 126 | 1 | 120.000000 | 25.000000  |
| 121 | 126 | 125 | 1 | 52.000000  | 550.000000 |
| 125 | 126 | 127 | 1 | 136.000000 | 100.000000 |
| 125 | 126 | 128 | 1 | 136.000000 | 100.000000 |
| 125 | 130 | 131 | 1 | 136.000000 | 100.000000 |
| 125 | 130 | 132 | 1 | 136.000000 | 100.000000 |
| 126 | 125 | 130 | 1 | 120.000000 | 25.000000  |
| 125 | 130 | 129 | 1 | 52.000000  | 550.000000 |
| 129 | 130 | 131 | 1 | 136.000000 | 100.000000 |
| 129 | 130 | 132 | 1 | 136.000000 | 100.000000 |
| 129 | 134 | 135 | 1 | 136.000000 | 100.000000 |
| 129 | 134 | 136 | 1 | 136.000000 | 100.000000 |
| 130 | 129 | 134 | 1 | 120.000000 | 25.000000  |
| 129 | 134 | 133 | 1 | 52.000000  | 550.000000 |
| 133 | 134 | 135 | 1 | 136.000000 | 100.000000 |
| 133 | 134 | 136 | 1 | 136.000000 | 100.000000 |
| 133 | 138 | 139 | 1 | 136.000000 | 100.000000 |
| 133 | 138 | 140 | 1 | 136.000000 | 100.000000 |
| 134 | 133 | 138 | 1 | 120.000000 | 25.000000  |
| 133 | 138 | 137 | 1 | 52.000000  | 550.000000 |
| 137 | 138 | 139 | 1 | 136.000000 | 100.000000 |
| 137 | 138 | 140 | 1 | 136.000000 | 100.000000 |
| 137 | 142 | 143 | 1 | 136.000000 | 100.000000 |
| 137 | 142 | 144 | 1 | 136.000000 | 100.000000 |
| 138 | 137 | 142 | 1 | 120.000000 | 25.000000  |
| 137 | 142 | 141 | 1 | 52.000000  | 550.000000 |
| 141 | 142 | 143 | 1 | 136.000000 | 100.000000 |
| 141 | 142 | 144 | 1 | 136.000000 | 100.000000 |
| 141 | 146 | 147 | 1 | 136.000000 | 100.000000 |
| 141 | 146 | 148 | 1 | 136.000000 | 100.000000 |
| 142 | 141 | 146 | 1 | 120.000000 | 25.000000  |
| 141 | 146 | 145 | 1 | 52.000000  | 550.000000 |
| 145 | 146 | 147 | 1 | 136.000000 | 100.000000 |
| 145 | 146 | 148 | 1 | 136.000000 | 100.000000 |
| 145 | 150 | 151 | 1 | 136.000000 | 100.000000 |
| 145 | 150 | 152 | 1 | 136.000000 | 100.000000 |
| 146 | 145 | 150 | 1 | 120.000000 | 25.000000  |
| 145 | 150 | 149 | 1 | 52.000000  | 550.000000 |
| 149 | 150 | 151 | 1 | 136.000000 | 100.000000 |
| 149 | 150 | 152 | 1 | 136.000000 | 100.000000 |
| 149 | 154 | 155 | 1 | 136.000000 | 100.000000 |
| 149 | 154 | 156 | 1 | 136.000000 | 100.000000 |
| 150 | 149 | 154 | 1 | 120.000000 | 25.000000  |
| 149 | 154 | 153 | 1 | 52.000000  | 550.000000 |
| 153 | 154 | 155 | 1 | 136.000000 | 100.000000 |
| 153 | 154 | 156 | 1 | 136.000000 | 100.000000 |
| 153 | 158 | 159 | 1 | 136.000000 | 100.000000 |
| 153 | 158 | 160 | 1 | 136.000000 | 100.000000 |
| 154 | 153 | 158 | 1 | 120.000000 | 25.000000  |
| 153 | 158 | 157 | 1 | 52.000000  | 550.000000 |
| 157 | 158 | 159 | 1 | 136.000000 | 100.000000 |
| 157 | 158 | 160 | 1 | 136.000000 | 100.000000 |
| 157 | 162 | 163 | 1 | 136.000000 | 100.000000 |
| 157 | 162 | 164 | 1 | 136.000000 | 100.000000 |
| 158 | 157 | 162 | 1 | 120.000000 | 25.000000  |
| 157 | 162 | 161 | 1 | 52.000000  | 550.000000 |
| 161 | 162 | 163 | 1 | 136.000000 | 100.000000 |
| 161 | 162 | 164 | 1 | 136.000000 | 100.000000 |
| 161 | 166 | 167 | 1 | 136.000000 | 100.000000 |
| 161 | 166 | 168 | 1 | 136.000000 | 100.000000 |
| 162 | 161 | 166 | 1 | 120.000000 | 25.000000  |

|     |     |     |   |            |            |
|-----|-----|-----|---|------------|------------|
| 161 | 166 | 165 | 1 | 52.000000  | 550.000000 |
| 165 | 166 | 167 | 1 | 136.000000 | 100.000000 |
| 165 | 166 | 168 | 1 | 136.000000 | 100.000000 |
| 165 | 170 | 171 | 1 | 136.000000 | 100.000000 |
| 165 | 170 | 172 | 1 | 136.000000 | 100.000000 |
| 166 | 165 | 170 | 1 | 120.000000 | 25.000000  |
| 165 | 170 | 169 | 1 | 52.000000  | 550.000000 |
| 169 | 170 | 171 | 1 | 136.000000 | 100.000000 |
| 169 | 170 | 172 | 1 | 136.000000 | 100.000000 |
| 169 | 174 | 175 | 1 | 136.000000 | 100.000000 |
| 169 | 174 | 176 | 1 | 136.000000 | 100.000000 |
| 170 | 169 | 174 | 1 | 120.000000 | 25.000000  |
| 169 | 174 | 173 | 1 | 52.000000  | 550.000000 |
| 173 | 174 | 175 | 1 | 136.000000 | 100.000000 |
| 173 | 174 | 176 | 1 | 136.000000 | 100.000000 |
| 173 | 178 | 179 | 1 | 136.000000 | 100.000000 |
| 173 | 178 | 180 | 1 | 136.000000 | 100.000000 |
| 174 | 173 | 178 | 1 | 120.000000 | 25.000000  |
| 173 | 178 | 177 | 1 | 52.000000  | 550.000000 |
| 177 | 178 | 179 | 1 | 136.000000 | 100.000000 |
| 177 | 178 | 180 | 1 | 136.000000 | 100.000000 |
| 177 | 182 | 183 | 1 | 136.000000 | 100.000000 |
| 177 | 182 | 184 | 1 | 136.000000 | 100.000000 |
| 178 | 177 | 182 | 1 | 120.000000 | 25.000000  |
| 177 | 182 | 181 | 1 | 52.000000  | 550.000000 |
| 181 | 182 | 183 | 1 | 136.000000 | 100.000000 |
| 181 | 182 | 184 | 1 | 136.000000 | 100.000000 |
| 181 | 186 | 187 | 1 | 136.000000 | 100.000000 |
| 181 | 186 | 188 | 1 | 136.000000 | 100.000000 |
| 182 | 181 | 186 | 1 | 120.000000 | 25.000000  |
| 181 | 186 | 185 | 1 | 52.000000  | 550.000000 |
| 185 | 186 | 187 | 1 | 136.000000 | 100.000000 |
| 185 | 186 | 188 | 1 | 136.000000 | 100.000000 |
| 185 | 190 | 191 | 1 | 136.000000 | 100.000000 |
| 185 | 190 | 192 | 1 | 136.000000 | 100.000000 |
| 186 | 185 | 190 | 1 | 120.000000 | 25.000000  |
| 185 | 190 | 189 | 1 | 52.000000  | 550.000000 |
| 189 | 190 | 191 | 1 | 136.000000 | 100.000000 |
| 189 | 190 | 192 | 1 | 136.000000 | 100.000000 |
| 189 | 194 | 195 | 1 | 136.000000 | 100.000000 |
| 189 | 194 | 196 | 1 | 136.000000 | 100.000000 |
| 190 | 189 | 194 | 1 | 120.000000 | 25.000000  |
| 189 | 194 | 193 | 1 | 52.000000  | 550.000000 |
| 193 | 194 | 195 | 1 | 136.000000 | 100.000000 |
| 193 | 194 | 196 | 1 | 136.000000 | 100.000000 |
| 193 | 198 | 199 | 1 | 136.000000 | 100.000000 |
| 193 | 198 | 200 | 1 | 136.000000 | 100.000000 |
| 194 | 193 | 198 | 1 | 120.000000 | 25.000000  |
| 193 | 198 | 197 | 1 | 52.000000  | 550.000000 |
| 197 | 198 | 199 | 1 | 136.000000 | 100.000000 |
| 197 | 198 | 200 | 1 | 136.000000 | 100.000000 |

## 2.1 Polypropylene NP Coordinates

### POLYPROPYLENE

1800

|      |     |    |       |       |       |        |         |        |
|------|-----|----|-------|-------|-------|--------|---------|--------|
| 1IPP | C1  | 1  | 2.665 | 5.221 | 6.357 | 0.3598 | -0.3395 | 0.2734 |
| 1IPP | C2  | 2  | 2.734 | 5.151 | 6.076 | 0.3428 | -0.3337 | 0.2622 |
| 1IPP | C3  | 3  | 2.733 | 4.862 | 6.007 | 0.3849 | -0.3373 | 0.2714 |
| 1IPP | C4  | 4  | 2.974 | 4.692 | 6.038 | 0.4110 | -0.2847 | 0.2394 |
| 1IPP | C5  | 5  | 3.196 | 4.656 | 5.844 | 0.3884 | -0.2649 | 0.2280 |
| 1IPP | C6  | 6  | 3.463 | 4.784 | 5.863 | 0.3785 | -0.2218 | 0.1985 |
| 1IPP | C7  | 7  | 3.547 | 4.998 | 5.676 | 0.3249 | -0.2133 | 0.1942 |
| 1IPP | C8  | 8  | 3.730 | 4.939 | 5.451 | 0.3144 | -0.1917 | 0.1600 |
| 1IPP | C9  | 9  | 4.028 | 4.971 | 5.453 | 0.3037 | -0.1449 | 0.1329 |
| 1IPP | C10 | 10 | 4.227 | 4.750 | 5.472 | 0.3466 | -0.1083 | 0.1263 |
| 1IPP | C11 | 11 | 4.380 | 4.678 | 5.716 | 0.3835 | -0.0786 | 0.1093 |
| 1IPP | C12 | 12 | 4.236 | 4.511 | 5.914 | 0.4270 | -0.0937 | 0.1315 |
| 1IPP | C13 | 13 | 4.059 | 4.646 | 6.107 | 0.4240 | -0.1278 | 0.1349 |
| 1IPP | C14 | 14 | 3.937 | 4.850 | 5.930 | 0.3806 | -0.1452 | 0.1515 |
| 1IPP | C15 | 15 | 4.164 | 5.037 | 5.886 | 0.3404 | -0.1081 | 0.1230 |
| 1IPP | C16 | 16 | 4.265 | 5.191 | 6.118 | 0.3430 | -0.0937 | 0.1073 |
| 1IPP | C17 | 17 | 4.056 | 5.387 | 6.195 | 0.3125 | -0.1201 | 0.1247 |
| 1IPP | C18 | 18 | 3.827 | 5.260 | 6.334 | 0.3485 | -0.1472 | 0.1516 |
| 1IPP | C19 | 19 | 3.641 | 5.100 | 6.165 | 0.3711 | -0.1900 | 0.1677 |
| 1IPP | C20 | 20 | 3.372 | 5.174 | 6.063 | 0.3411 | -0.2299 | 0.1894 |
| 1IPP | C21 | 21 | 3.152 | 5.077 | 6.235 | 0.3668 | -0.2601 | 0.2251 |
| 1IPP | C22 | 22 | 3.279 | 4.857 | 6.385 | 0.4251 | -0.2368 | 0.2192 |
| 1IPP | C23 | 23 | 3.348 | 4.588 | 6.282 | 0.4452 | -0.2303 | 0.2085 |
| 1IPP | C24 | 24 | 3.631 | 4.521 | 6.224 | 0.4659 | -0.1866 | 0.1847 |
| 1IPP | C25 | 25 | 3.667 | 4.395 | 5.959 | 0.4530 | -0.1868 | 0.1863 |
| 1IPP | C26 | 26 | 3.526 | 4.137 | 5.993 | 0.4938 | -0.2092 | 0.2103 |
| 1IPP | C27 | 27 | 3.409 | 4.101 | 6.266 | 0.5298 | -0.2139 | 0.2186 |
| 1IPP | C28 | 28 | 3.114 | 4.112 | 6.315 | 0.5344 | -0.2674 | 0.2484 |
| 1IPP | C29 | 29 | 2.962 | 4.362 | 6.369 | 0.5002 | -0.2871 | 0.2649 |
| 1IPP | C30 | 30 | 2.990 | 4.414 | 6.660 | 0.5230 | -0.2812 | 0.2544 |
| 1IPP | C31 | 31 | 3.247 | 4.548 | 6.726 | 0.4998 | -0.2268 | 0.2238 |
| 1IPP | C32 | 32 | 3.497 | 4.402 | 6.662 | 0.5201 | -0.1988 | 0.2020 |
| 1IPP | C33 | 33 | 3.581 | 4.203 | 6.865 | 0.5710 | -0.1824 | 0.2068 |
| 1IPP | C34 | 34 | 3.644 | 4.394 | 7.083 | 0.5626 | -0.1676 | 0.1923 |
| 1IPP | C35 | 35 | 3.819 | 4.616 | 6.991 | 0.5163 | -0.1272 | 0.1648 |
| 1IPP | C36 | 36 | 4.110 | 4.607 | 7.046 | 0.5298 | -0.0930 | 0.1378 |
| 1IPP | C37 | 37 | 4.169 | 4.745 | 7.303 | 0.5301 | -0.0737 | 0.1275 |
| 1IPP | C38 | 38 | 4.143 | 5.039 | 7.350 | 0.4830 | -0.0909 | 0.1296 |
| 1IPP | C39 | 39 | 4.326 | 5.248 | 7.243 | 0.4425 | -0.0484 | 0.1004 |
| 1IPP | C40 | 40 | 4.589 | 5.214 | 7.375 | 0.4614 | -0.0114 | 0.0708 |
| 1IPP | C41 | 41 | 4.695 | 5.018 | 7.180 | 0.4824 | -0.0061 | 0.0644 |
| 1IPP | C42 | 42 | 4.601 | 4.736 | 7.179 | 0.5203 | 0.0066  | 0.0786 |
| 1IPP | C43 | 43 | 4.773 | 4.517 | 7.279 | 0.5672 | 0.0033  | 0.0723 |
| 1IPP | C44 | 44 | 4.917 | 4.424 | 7.038 | 0.5554 | 0.0386  | 0.0666 |
| 1IPP | C45 | 45 | 4.764 | 4.263 | 6.841 | 0.5512 | -0.0014 | 0.0748 |
| 1IPP | C46 | 46 | 4.687 | 4.396 | 6.586 | 0.5220 | -0.0154 | 0.0866 |
| 1IPP | C47 | 47 | 4.421 | 4.525 | 6.562 | 0.4766 | -0.0504 | 0.1059 |
| 1IPP | C48 | 48 | 4.405 | 4.817 | 6.601 | 0.4445 | -0.0628 | 0.1072 |
| 1IPP | C49 | 49 | 4.346 | 4.940 | 6.864 | 0.4579 | -0.0656 | 0.1043 |
| 1IPP | C50 | 50 | 4.059 | 5.016 | 6.877 | 0.4492 | -0.1059 | 0.1382 |
| 1IPP | C51 | 51 | 3.972 | 5.275 | 6.762 | 0.3909 | -0.1214 | 0.1352 |
| 1IPP | C52 | 52 | 4.032 | 5.483 | 6.964 | 0.3736 | -0.1148 | 0.1262 |
| 1IPP | C53 | 53 | 3.901 | 5.452 | 7.229 | 0.4091 | -0.1141 | 0.1395 |
| 1IPP | C54 | 54 | 3.624 | 5.534 | 7.294 | 0.4171 | -0.1651 | 0.1648 |
| 1IPP | C55 | 55 | 3.390 | 5.350 | 7.314 | 0.4310 | -0.2088 | 0.1890 |
| 1IPP | C56 | 56 | 3.213 | 5.307 | 7.078 | 0.4201 | -0.2392 | 0.2117 |
| 1IPP | C57 | 57 | 2.962 | 5.451 | 7.008 | 0.3884 | -0.2768 | 0.2371 |
| 1IPP | C58 | 58 | 2.691 | 5.332 | 7.032 | 0.4230 | -0.3081 | 0.2668 |
| 1IPP | C59 | 59 | 2.578 | 5.174 | 6.805 | 0.4139 | -0.3355 | 0.2705 |
| 1IPP | C60 | 60 | 2.461 | 4.905 | 6.858 | 0.4595 | -0.3614 | 0.2949 |
| 1IPP | C61 | 61 | 2.626 | 4.658 | 6.870 | 0.5016 | -0.3275 | 0.2838 |
| 1IPP | C62 | 62 | 2.745 | 4.692 | 7.139 | 0.5186 | -0.3093 | 0.2709 |
| 1IPP | C63 | 63 | 2.926 | 4.928 | 7.154 | 0.4845 | -0.2644 | 0.2494 |
| 1IPP | C64 | 64 | 3.199 | 4.853 | 7.063 | 0.4901 | -0.2348 | 0.2221 |
| 1IPP | C65 | 65 | 3.383 | 4.721 | 7.254 | 0.5257 | -0.1978 | 0.2132 |
| 1IPP | C66 | 66 | 3.540 | 4.923 | 7.403 | 0.5173 | -0.1733 | 0.1874 |
| 1IPP | C67 | 67 | 3.733 | 5.023 | 7.202 | 0.4774 | -0.1528 | 0.1688 |
| 1IPP | C68 | 68 | 3.602 | 5.128 | 6.958 | 0.4312 | -0.1743 | 0.1723 |

|      |      |     |       |       |       |         |         |        |
|------|------|-----|-------|-------|-------|---------|---------|--------|
| 1IPP | C69  | 69  | 3.537 | 4.909 | 6.770 | 0.4404  | -0.1902 | 0.1893 |
| 1IPP | C70  | 70  | 3.716 | 4.854 | 6.540 | 0.4448  | -0.1648 | 0.1640 |
| 1IPP | C71  | 71  | 3.969 | 4.699 | 6.553 | 0.4656  | -0.1244 | 0.1433 |
| 1IPP | C72  | 72  | 3.965 | 4.403 | 6.536 | 0.5024  | -0.1267 | 0.1530 |
| 1IPP | C73  | 73  | 4.021 | 4.242 | 6.780 | 0.5585  | -0.1158 | 0.1557 |
| 1IPP | C74  | 74  | 4.306 | 4.185 | 6.839 | 0.5732  | -0.0681 | 0.1245 |
| 1IPP | C75  | 75  | 4.389 | 3.969 | 6.652 | 0.5911  | -0.0631 | 0.1198 |
| 1IPP | C76  | 76  | 4.485 | 4.049 | 6.382 | 0.5423  | -0.0493 | 0.1113 |
| 1IPP | C77  | 77  | 4.292 | 4.233 | 6.252 | 0.5163  | -0.0830 | 0.1262 |
| 1IPP | C78  | 78  | 4.031 | 4.161 | 6.129 | 0.4948  | -0.1301 | 0.1488 |
| 1IPP | C79  | 79  | 4.015 | 4.078 | 5.843 | 0.4898  | -0.1330 | 0.1644 |
| 1IPP | C80  | 80  | 4.055 | 4.269 | 5.618 | 0.4393  | -0.1221 | 0.1556 |
| 1IPP | C81  | 81  | 3.877 | 4.505 | 5.581 | 0.4071  | -0.1645 | 0.1634 |
| 1IPP | C82  | 82  | 3.590 | 4.484 | 5.509 | 0.3885  | -0.2113 | 0.1840 |
| 1IPP | C83  | 83  | 3.489 | 4.373 | 5.252 | 0.3824  | -0.2217 | 0.2087 |
| 1IPP | C84  | 84  | 3.468 | 4.515 | 4.990 | 0.3285  | -0.2344 | 0.2080 |
| 1IPP | C85  | 85  | 3.262 | 4.716 | 4.916 | 0.3021  | -0.2783 | 0.2203 |
| 1IPP | C86  | 86  | 3.329 | 5.001 | 4.862 | 0.2482  | -0.2592 | 0.1953 |
| 1IPP | C87  | 87  | 3.433 | 5.087 | 5.124 | 0.2567  | -0.2395 | 0.2017 |
| 1IPP | C88  | 88  | 3.217 | 5.030 | 5.315 | 0.2915  | -0.2735 | 0.2134 |
| 1IPP | C89  | 89  | 3.240 | 4.749 | 5.406 | 0.3398  | -0.2671 | 0.2162 |
| 1IPP | C90  | 90  | 3.058 | 4.537 | 5.303 | 0.3669  | -0.3014 | 0.2390 |
| 1IPP | C91  | 91  | 2.777 | 4.528 | 5.400 | 0.3665  | -0.3318 | 0.2640 |
| 1IPP | C92  | 92  | 2.731 | 4.501 | 5.693 | 0.4077  | -0.3325 | 0.2776 |
| 1IPP | C93  | 93  | 2.783 | 4.243 | 5.829 | 0.4571  | -0.3281 | 0.2754 |
| 1IPP | C94  | 94  | 3.073 | 4.242 | 5.890 | 0.4693  | -0.2833 | 0.2597 |
| 1IPP | C95  | 95  | 3.218 | 4.245 | 5.630 | 0.4426  | -0.2620 | 0.2385 |
| 1IPP | C96  | 96  | 3.357 | 4.000 | 5.536 | 0.4760  | -0.2462 | 0.2243 |
| 1IPP | C97  | 97  | 3.652 | 4.023 | 5.564 | 0.4553  | -0.2029 | 0.1983 |
| 1IPP | C98  | 98  | 3.830 | 4.046 | 5.327 | 0.4409  | -0.1717 | 0.1786 |
| 1IPP | C99  | 99  | 4.054 | 3.851 | 5.326 | 0.4781  | -0.1463 | 0.1652 |
| 1IPP | C100 | 100 | 4.296 | 3.893 | 5.496 | 0.4775  | -0.1055 | 0.1394 |
| 1IPP | C1   | 101 | 2.158 | 5.092 | 4.695 | 0.2144  | -0.4454 | 0.3248 |
| 1IPP | C2   | 102 | 2.180 | 5.385 | 4.738 | 0.1608  | -0.4460 | 0.3175 |
| 1IPP | C3   | 103 | 2.249 | 5.495 | 5.003 | 0.1818  | -0.4274 | 0.3072 |
| 1IPP | C4   | 104 | 2.022 | 5.523 | 5.191 | 0.2011  | -0.4662 | 0.3286 |
| 1IPP | C5   | 105 | 1.890 | 5.779 | 5.263 | 0.1602  | -0.4812 | 0.3296 |
| 1IPP | C6   | 106 | 1.999 | 5.954 | 5.478 | 0.1602  | -0.4528 | 0.3181 |
| 1IPP | C7   | 107 | 1.935 | 5.901 | 5.763 | 0.1883  | -0.4582 | 0.3319 |
| 1IPP | C8   | 108 | 1.724 | 6.037 | 5.921 | 0.1896  | -0.4915 | 0.3431 |
| 1IPP | C9   | 109 | 1.784 | 6.305 | 6.034 | 0.1651  | -0.4755 | 0.3385 |
| 1IPP | C10  | 110 | 1.963 | 6.331 | 6.270 | 0.1898  | -0.4418 | 0.3050 |
| 1IPP | C11  | 111 | 2.231 | 6.453 | 6.232 | 0.1409  | -0.4169 | 0.2896 |
| 1IPP | C12  | 112 | 2.223 | 6.750 | 6.261 | 0.1147  | -0.4001 | 0.2798 |
| 1IPP | C13  | 113 | 2.158 | 6.922 | 6.027 | 0.0569  | -0.4200 | 0.2781 |
| 1IPP | C14  | 114 | 2.004 | 6.819 | 5.794 | 0.0613  | -0.4509 | 0.2975 |
| 1IPP | C15  | 115 | 2.126 | 6.640 | 5.590 | 0.0575  | -0.4387 | 0.2968 |
| 1IPP | C16  | 116 | 2.075 | 6.366 | 5.692 | 0.1256  | -0.4361 | 0.2970 |
| 1IPP | C17  | 117 | 2.269 | 6.215 | 5.857 | 0.1501  | -0.4023 | 0.2865 |
| 1IPP | C18  | 118 | 2.380 | 5.974 | 5.727 | 0.1781  | -0.3911 | 0.2860 |
| 1IPP | C19  | 119 | 2.547 | 6.075 | 5.507 | 0.1472  | -0.3756 | 0.2587 |
| 1IPP | C20  | 120 | 2.371 | 6.214 | 5.314 | 0.1051  | -0.4031 | 0.2765 |
| 1IPP | C21  | 121 | 2.286 | 5.997 | 5.132 | 0.1146  | -0.4338 | 0.2807 |
| 1IPP | C22  | 122 | 2.507 | 5.851 | 4.999 | 0.1270  | -0.3899 | 0.2780 |
| 1IPP | C23  | 123 | 2.582 | 5.903 | 4.717 | 0.0857  | -0.3878 | 0.2658 |
| 1IPP | C24  | 124 | 2.408 | 5.749 | 4.532 | 0.0937  | -0.4172 | 0.2805 |
| 1IPP | C25  | 125 | 2.166 | 5.916 | 4.557 | 0.0689  | -0.4594 | 0.3119 |
| 1IPP | C26  | 126 | 2.011 | 5.868 | 4.804 | 0.1055  | -0.4774 | 0.3168 |
| 1IPP | C27  | 127 | 1.810 | 5.652 | 4.790 | 0.1400  | -0.5004 | 0.3458 |
| 1IPP | C28  | 128 | 1.547 | 5.727 | 4.673 | 0.1110  | -0.5425 | 0.3702 |
| 1IPP | C29  | 129 | 1.601 | 5.819 | 4.396 | 0.0816  | -0.5369 | 0.3621 |
| 1IPP | C30  | 130 | 1.767 | 6.064 | 4.417 | 0.0293  | -0.5210 | 0.3393 |
| 1IPP | C31  | 131 | 1.677 | 6.348 | 4.399 | -0.0135 | -0.5325 | 0.3422 |
| 1IPP | C32  | 132 | 1.712 | 6.525 | 4.161 | -0.0672 | -0.5380 | 0.3322 |
| 1IPP | C33  | 133 | 1.977 | 6.662 | 4.149 | -0.0821 | -0.4864 | 0.3049 |
| 1IPP | C34  | 134 | 1.997 | 6.796 | 4.413 | -0.0788 | -0.4816 | 0.2984 |
| 1IPP | C35  | 135 | 2.020 | 7.085 | 4.480 | -0.1111 | -0.4781 | 0.2966 |
| 1IPP | C36  | 136 | 2.296 | 7.158 | 4.560 | -0.1337 | -0.4420 | 0.2567 |
| 1IPP | C37  | 137 | 2.357 | 7.034 | 4.823 | -0.0716 | -0.4178 | 0.2583 |
| 1IPP | C38  | 138 | 2.260 | 7.174 | 5.065 | -0.0707 | -0.4308 | 0.2551 |
| 1IPP | C39  | 139 | 2.465 | 7.323 | 5.219 | -0.0803 | -0.3885 | 0.2382 |
| 1IPP | C40  | 140 | 2.584 | 7.129 | 5.408 | -0.0330 | -0.3690 | 0.2367 |
| 1IPP | C41  | 141 | 2.390 | 7.035 | 5.610 | -0.0014 | -0.3946 | 0.2584 |

|      |      |     |       |       |       |         |         |         |
|------|------|-----|-------|-------|-------|---------|---------|---------|
| 1IPP | C42  | 142 | 2.310 | 7.266 | 5.779 | -0.0260 | -0.3942 | 0.2510  |
| 1IPP | C43  | 143 | 2.531 | 7.327 | 5.966 | 0.0031  | -0.3668 | 0.2386  |
| 1IPP | C44  | 144 | 2.575 | 7.090 | 6.139 | 0.0390  | -0.3592 | 0.2328  |
| 1IPP | C45  | 145 | 2.678 | 6.837 | 6.019 | 0.0778  | -0.3468 | 0.2269  |
| 1IPP | C46  | 146 | 2.482 | 6.657 | 5.888 | 0.0969  | -0.3718 | 0.2591  |
| 1IPP | C47  | 147 | 2.564 | 6.501 | 5.652 | 0.0996  | -0.3698 | 0.2436  |
| 1IPP | C48  | 148 | 2.602 | 6.660 | 5.406 | 0.0412  | -0.3673 | 0.2408  |
| 1IPP | C49  | 149 | 2.394 | 6.740 | 5.210 | 0.0038  | -0.3940 | 0.2560  |
| 1IPP | C50  | 150 | 2.291 | 6.532 | 5.025 | 0.0175  | -0.4226 | 0.2725  |
| 1IPP | C51  | 151 | 2.502 | 6.403 | 4.860 | 0.0219  | -0.4017 | 0.2590  |
| 1IPP | C52  | 152 | 2.615 | 6.640 | 4.723 | -0.0271 | -0.3713 | 0.2380  |
| 1IPP | C53  | 153 | 2.422 | 6.728 | 4.517 | -0.0592 | -0.4174 | 0.2638  |
| 1IPP | C54  | 154 | 2.445 | 6.711 | 4.223 | -0.0846 | -0.4185 | 0.2465  |
| 1IPP | C55  | 155 | 2.519 | 6.980 | 4.124 | -0.1382 | -0.4111 | 0.2473  |
| 1IPP | C56  | 156 | 2.259 | 7.119 | 4.078 | -0.1675 | -0.4404 | 0.2641  |
| 1IPP | C57  | 157 | 2.165 | 7.049 | 3.805 | -0.1799 | -0.4659 | 0.2771  |
| 1IPP | C58  | 158 | 2.251 | 6.766 | 3.773 | -0.1399 | -0.4606 | 0.2759  |
| 1IPP | C59  | 159 | 2.539 | 6.742 | 3.706 | -0.1466 | -0.4152 | 0.2399  |
| 1IPP | C60  | 160 | 2.650 | 6.569 | 3.491 | -0.1407 | -0.4012 | 0.2462  |
| 1IPP | C61  | 161 | 2.673 | 6.285 | 3.576 | -0.0833 | -0.3996 | 0.2377  |
| 1IPP | C62  | 162 | 2.901 | 6.174 | 3.731 | -0.0547 | -0.3574 | 0.2278  |
| 1IPP | C63  | 163 | 3.098 | 6.018 | 3.575 | -0.0409 | -0.3197 | 0.2097  |
| 1IPP | C64  | 164 | 3.059 | 5.723 | 3.569 | -0.0045 | -0.3461 | 0.2194  |
| 1IPP | C65  | 165 | 2.806 | 5.641 | 3.438 | 0.0001  | -0.3792 | 0.2399  |
| 1IPP | C66  | 166 | 2.561 | 5.631 | 3.608 | 0.0114  | -0.4050 | 0.2695  |
| 1IPP | C67  | 167 | 2.423 | 5.890 | 3.655 | -0.0098 | -0.4406 | 0.2834  |
| 1IPP | C68  | 168 | 2.493 | 6.042 | 3.901 | -0.0180 | -0.4178 | 0.2627  |
| 1IPP | C69  | 169 | 2.331 | 6.021 | 4.148 | 0.0125  | -0.4265 | 0.2806  |
| 1IPP | C70  | 170 | 2.117 | 6.220 | 4.189 | -0.0075 | -0.4725 | 0.3108  |
| 1IPP | C71  | 171 | 2.187 | 6.371 | 4.433 | -0.0130 | -0.4524 | 0.2765  |
| 1IPP | C72  | 172 | 2.062 | 6.336 | 4.700 | 0.0195  | -0.4542 | 0.3081  |
| 1IPP | C73  | 173 | 1.859 | 6.540 | 4.775 | -0.0077 | -0.5112 | 0.3176  |
| 1IPP | C74  | 174 | 1.927 | 6.812 | 4.876 | -0.0328 | -0.4785 | 0.3123  |
| 1IPP | C75  | 175 | 1.960 | 6.824 | 5.171 | -0.0056 | -0.4646 | 0.2994  |
| 1IPP | C76  | 176 | 1.747 | 6.656 | 5.292 | 0.0266  | -0.4942 | 0.3257  |
| 1IPP | C77  | 177 | 1.837 | 6.374 | 5.320 | 0.0710  | -0.4908 | 0.3260  |
| 1IPP | C78  | 178 | 1.863 | 6.191 | 5.088 | 0.0901  | -0.4836 | 0.3257  |
| 1IPP | C79  | 179 | 1.619 | 6.059 | 4.980 | 0.0857  | -0.5190 | 0.3523  |
| 1IPP | C80  | 180 | 1.464 | 5.842 | 5.117 | 0.1392  | -0.5622 | 0.3772  |
| 1IPP | C81  | 181 | 1.526 | 5.550 | 5.122 | 0.1872  | -0.5358 | 0.3805  |
| 1IPP | C82  | 182 | 1.567 | 5.391 | 5.372 | 0.2324  | -0.5249 | 0.3746  |
| 1IPP | C83  | 183 | 1.808 | 5.362 | 5.545 | 0.2501  | -0.4794 | 0.3469  |
| 1IPP | C84  | 184 | 2.020 | 5.151 | 5.520 | 0.2864  | -0.4556 | 0.3319  |
| 1IPP | C85  | 185 | 2.274 | 5.191 | 5.369 | 0.2724  | -0.4213 | 0.3086  |
| 1IPP | C86  | 186 | 2.339 | 5.060 | 5.110 | 0.2624  | -0.4140 | 0.3129  |
| 1IPP | C87  | 187 | 2.532 | 4.834 | 5.108 | 0.2939  | -0.3895 | 0.2965  |
| 1IPP | C88  | 188 | 2.821 | 4.907 | 5.089 | 0.2850  | -0.3303 | 0.2656  |
| 1IPP | C89  | 189 | 2.874 | 4.930 | 4.797 | 0.2513  | -0.3419 | 0.2474  |
| 1IPP | C90  | 190 | 2.876 | 5.191 | 4.655 | 0.1961  | -0.3317 | 0.2428  |
| 1IPP | C91  | 191 | 2.612 | 5.324 | 4.623 | 0.1721  | -0.3818 | 0.2753  |
| 1IPP | C92  | 192 | 2.461 | 5.239 | 4.383 | 0.1576  | -0.4119 | 0.2801  |
| 1IPP | C93  | 193 | 2.560 | 5.348 | 4.125 | 0.1102  | -0.3891 | 0.2675  |
| 1IPP | C94  | 194 | 2.442 | 5.609 | 4.052 | 0.0697  | -0.4314 | 0.2896  |
| 1IPP | C95  | 195 | 2.165 | 5.625 | 3.944 | 0.0617  | -0.4644 | 0.3084  |
| 1IPP | C96  | 196 | 1.975 | 5.728 | 4.148 | 0.0609  | -0.4938 | 0.3315  |
| 1IPP | C97  | 197 | 1.992 | 5.539 | 4.375 | 0.1004  | -0.4874 | 0.3249  |
| 1IPP | C98  | 198 | 1.835 | 5.291 | 4.427 | 0.1568  | -0.5081 | 0.3532  |
| 1IPP | C99  | 199 | 1.650 | 5.262 | 4.659 | 0.1930  | -0.5235 | 0.3850  |
| 1IPP | C100 | 200 | 1.770 | 5.207 | 4.927 | 0.2142  | -0.5086 | 0.3564  |
| 1IPP | C1   | 201 | 5.242 | 5.864 | 5.488 | 0.1687  | 0.0512  | 0.0005  |
| 1IPP | C2   | 202 | 5.033 | 5.746 | 5.664 | 0.2196  | 0.0263  | 0.0103  |
| 1IPP | C3   | 203 | 5.042 | 5.750 | 5.963 | 0.2423  | 0.0287  | 0.0177  |
| 1IPP | C4   | 204 | 5.242 | 5.600 | 6.124 | 0.2777  | 0.0645  | 0.0010  |
| 1IPP | C5   | 205 | 5.260 | 5.311 | 6.184 | 0.3298  | 0.0739  | 0.0045  |
| 1IPP | C6   | 206 | 5.140 | 5.237 | 6.442 | 0.3647  | 0.0468  | 0.0044  |
| 1IPP | C7   | 207 | 5.288 | 5.326 | 6.683 | 0.3864  | 0.0776  | 0.0086  |
| 1IPP | C8   | 208 | 5.469 | 5.158 | 6.849 | 0.4174  | 0.1180  | -0.0174 |
| 1IPP | C9   | 209 | 5.367 | 4.892 | 6.934 | 0.4730  | 0.1018  | -0.0010 |
| 1IPP | C10  | 210 | 5.122 | 4.843 | 7.094 | 0.4993  | 0.0657  | 0.0271  |
| 1IPP | C11  | 211 | 5.101 | 4.846 | 7.390 | 0.5177  | 0.0738  | 0.0367  |
| 1IPP | C12  | 212 | 5.265 | 4.621 | 7.493 | 0.5831  | 0.0993  | 0.0266  |
| 1IPP | C13  | 213 | 5.217 | 4.353 | 7.375 | 0.5937  | 0.0897  | 0.0389  |
| 1IPP | C14  | 214 | 5.400 | 4.298 | 7.146 | 0.5946  | 0.1046  | 0.0233  |

|      |     |     |       |       |       |        |         |         |
|------|-----|-----|-------|-------|-------|--------|---------|---------|
| 1IPP | C15 | 215 | 5.343 | 4.417 | 6.879 | 0.5402 | 0.0875  | 0.0081  |
| 1IPP | C16 | 216 | 5.178 | 4.270 | 6.680 | 0.5457 | 0.0670  | 0.0357  |
| 1IPP | C17 | 217 | 5.305 | 4.120 | 6.458 | 0.5441 | 0.0801  | 0.0334  |
| 1IPP | C18 | 218 | 5.377 | 4.339 | 6.272 | 0.4954 | 0.0946  | 0.0149  |
| 1IPP | C19 | 219 | 5.626 | 4.479 | 6.348 | 0.4787 | 0.1170  | -0.0243 |
| 1IPP | C20 | 220 | 5.564 | 4.674 | 6.563 | 0.4619 | 0.1185  | -0.0038 |
| 1IPP | C21 | 221 | 5.461 | 4.937 | 6.475 | 0.4165 | 0.1110  | -0.0059 |
| 1IPP | C22 | 222 | 5.636 | 5.163 | 6.389 | 0.3877 | 0.1400  | -0.0289 |
| 1IPP | C23 | 223 | 5.796 | 5.338 | 6.567 | 0.3522 | 0.1532  | -0.0478 |
| 1IPP | C24 | 224 | 5.673 | 5.558 | 6.726 | 0.3468 | 0.1385  | -0.0403 |
| 1IPP | C25 | 225 | 5.543 | 5.793 | 6.598 | 0.2954 | 0.1213  | -0.0352 |
| 1IPP | C26 | 226 | 5.257 | 5.852 | 6.652 | 0.2936 | 0.0733  | -0.0102 |
| 1IPP | C27 | 227 | 5.033 | 5.691 | 6.541 | 0.3015 | 0.0351  | 0.0208  |
| 1IPP | C28 | 228 | 4.814 | 5.819 | 6.385 | 0.2752 | -0.0018 | 0.0454  |
| 1IPP | C29 | 229 | 4.593 | 5.969 | 6.518 | 0.2593 | -0.0294 | 0.0628  |
| 1IPP | C30 | 230 | 4.389 | 5.810 | 6.666 | 0.3138 | -0.0519 | 0.0782  |
| 1IPP | C31 | 231 | 4.170 | 5.644 | 6.552 | 0.3160 | -0.0984 | 0.1085  |
| 1IPP | C32 | 232 | 3.881 | 5.704 | 6.511 | 0.2906 | -0.1503 | 0.1409  |
| 1IPP | C33 | 233 | 3.691 | 5.646 | 6.731 | 0.3331 | -0.1690 | 0.1514  |
| 1IPP | C34 | 234 | 3.692 | 5.885 | 6.906 | 0.3082 | -0.1662 | 0.1489  |
| 1IPP | C35 | 235 | 3.890 | 5.913 | 7.126 | 0.3441 | -0.1182 | 0.1278  |
| 1IPP | C36 | 236 | 4.179 | 5.943 | 7.061 | 0.3132 | -0.0869 | 0.1057  |
| 1IPP | C37 | 237 | 4.379 | 5.729 | 7.113 | 0.3634 | -0.0410 | 0.0801  |
| 1IPP | C38 | 238 | 4.542 | 5.768 | 7.359 | 0.3692 | -0.0206 | 0.0621  |
| 1IPP | C39 | 239 | 4.766 | 5.964 | 7.344 | 0.3591 | 0.0141  | 0.0368  |
| 1IPP | C40 | 240 | 5.059 | 5.910 | 7.343 | 0.3512 | 0.0678  | 0.0134  |
| 1IPP | C41 | 241 | 5.252 | 5.890 | 7.117 | 0.3427 | 0.0876  | -0.0014 |
| 1IPP | C42 | 242 | 5.305 | 5.614 | 7.023 | 0.3671 | 0.0958  | -0.0122 |
| 1IPP | C43 | 243 | 5.457 | 5.428 | 7.199 | 0.4195 | 0.1206  | -0.0148 |
| 1IPP | C44 | 244 | 5.753 | 5.399 | 7.198 | 0.4242 | 0.1643  | -0.0573 |
| 1IPP | C45 | 245 | 5.902 | 5.235 | 7.000 | 0.4214 | 0.1908  | -0.0513 |
| 1IPP | C46 | 246 | 6.152 | 5.363 | 6.899 | 0.3997 | 0.2208  | -0.0876 |
| 1IPP | C47 | 247 | 6.132 | 5.602 | 6.725 | 0.3420 | 0.2165  | -0.0884 |
| 1IPP | C48 | 248 | 6.085 | 5.826 | 6.916 | 0.3323 | 0.2176  | -0.0951 |
| 1IPP | C49 | 249 | 5.808 | 5.861 | 7.022 | 0.3272 | 0.1563  | -0.0577 |
| 1IPP | C50 | 250 | 5.647 | 6.093 | 6.928 | 0.2828 | 0.1483  | -0.0582 |
| 1IPP | C51 | 251 | 5.608 | 6.317 | 7.121 | 0.2665 | 0.1471  | -0.0466 |
| 1IPP | C52 | 252 | 5.343 | 6.314 | 7.254 | 0.2835 | 0.1056  | -0.0268 |
| 1IPP | C53 | 253 | 5.120 | 6.343 | 7.060 | 0.2528 | 0.0717  | -0.0019 |
| 1IPP | C54 | 254 | 5.039 | 6.613 | 6.968 | 0.2060 | 0.0457  | -0.0029 |
| 1IPP | C55 | 255 | 4.823 | 6.764 | 7.105 | 0.2026 | 0.0173  | 0.0221  |
| 1IPP | C56 | 256 | 4.544 | 6.692 | 7.026 | 0.1967 | -0.0278 | 0.0453  |
| 1IPP | C57 | 257 | 4.379 | 6.839 | 6.827 | 0.1639 | -0.0541 | 0.0648  |
| 1IPP | C58 | 258 | 4.435 | 6.817 | 6.537 | 0.1402 | -0.0442 | 0.0551  |
| 1IPP | C59 | 259 | 4.334 | 6.612 | 6.346 | 0.1367 | -0.0803 | 0.0580  |
| 1IPP | C60 | 260 | 4.496 | 6.367 | 6.317 | 0.1809 | -0.0517 | 0.0516  |
| 1IPP | C61 | 261 | 4.747 | 6.441 | 6.177 | 0.1470 | -0.0085 | 0.0294  |
| 1IPP | C62 | 262 | 4.759 | 6.414 | 5.885 | 0.1320 | -0.0170 | 0.0343  |
| 1IPP | C63 | 263 | 4.835 | 6.130 | 5.864 | 0.1731 | 0.0048  | 0.0301  |
| 1IPP | C64 | 264 | 4.615 | 5.931 | 5.855 | 0.1940 | -0.0454 | 0.0488  |
| 1IPP | C65 | 265 | 4.473 | 5.859 | 6.107 | 0.2306 | -0.0613 | 0.0765  |
| 1IPP | C66 | 266 | 4.189 | 5.897 | 6.184 | 0.2397 | -0.1007 | 0.1022  |
| 1IPP | C67 | 267 | 4.078 | 6.118 | 6.347 | 0.2166 | -0.1078 | 0.1091  |
| 1IPP | C68 | 268 | 4.047 | 6.105 | 6.642 | 0.2504 | -0.1100 | 0.1177  |
| 1IPP | C69 | 269 | 4.181 | 6.324 | 6.790 | 0.2314 | -0.0897 | 0.0885  |
| 1IPP | C70 | 270 | 4.477 | 6.328 | 6.780 | 0.2419 | -0.0500 | 0.0655  |
| 1IPP | C71 | 271 | 4.673 | 6.204 | 6.967 | 0.2686 | -0.0066 | 0.0368  |
| 1IPP | C72 | 272 | 4.864 | 5.991 | 6.884 | 0.3060 | 0.0243  | 0.0276  |
| 1IPP | C73 | 273 | 4.771 | 5.709 | 6.899 | 0.3327 | 0.0072  | 0.0458  |
| 1IPP | C74 | 274 | 4.820 | 5.505 | 7.109 | 0.3879 | 0.0208  | 0.0484  |
| 1IPP | C75 | 275 | 4.997 | 5.291 | 7.004 | 0.4157 | 0.0445  | 0.0329  |
| 1IPP | C76 | 276 | 4.871 | 5.139 | 6.780 | 0.4111 | 0.0109  | 0.0406  |
| 1IPP | C77 | 277 | 4.816 | 4.848 | 6.771 | 0.4669 | 0.0164  | 0.0618  |
| 1IPP | C78 | 278 | 5.048 | 4.702 | 6.657 | 0.4646 | 0.0382  | 0.0419  |
| 1IPP | C79 | 279 | 5.043 | 4.624 | 6.371 | 0.4496 | 0.0358  | 0.0417  |
| 1IPP | C80 | 280 | 5.139 | 4.812 | 6.162 | 0.4060 | 0.0434  | 0.0250  |
| 1IPP | C81 | 281 | 4.925 | 5.010 | 6.109 | 0.3810 | 0.0117  | 0.0441  |
| 1IPP | C82 | 282 | 4.672 | 4.932 | 5.977 | 0.3713 | -0.0333 | 0.0741  |
| 1IPP | C83 | 283 | 4.518 | 4.755 | 6.158 | 0.4161 | -0.0568 | 0.0871  |
| 1IPP | C84 | 284 | 4.666 | 4.500 | 6.122 | 0.4410 | -0.0258 | 0.0830  |
| 1IPP | C85 | 285 | 4.645 | 4.337 | 5.872 | 0.4544 | -0.0444 | 0.0873  |
| 1IPP | C86 | 286 | 4.519 | 4.070 | 5.883 | 0.4830 | -0.0516 | 0.1057  |
| 1IPP | C87 | 287 | 4.744 | 3.923 | 6.010 | 0.5412 | -0.0181 | 0.0945  |



|      |      |     |       |       |       |        |         |         |
|------|------|-----|-------|-------|-------|--------|---------|---------|
| 1IPP | C88  | 288 | 4.997 | 3.929 | 5.853 | 0.5092 | 0.0085  | 0.0573  |
| 1IPP | C89  | 289 | 5.194 | 4.147 | 5.902 | 0.4891 | 0.0545  | 0.0309  |
| 1IPP | C90  | 290 | 5.081 | 4.421 | 5.936 | 0.4461 | 0.0214  | 0.0451  |
| 1IPP | C91  | 291 | 4.989 | 4.626 | 5.740 | 0.3878 | 0.0133  | 0.0495  |
| 1IPP | C92  | 292 | 5.180 | 4.833 | 5.643 | 0.3499 | 0.0499  | 0.0296  |
| 1IPP | C93  | 293 | 5.256 | 5.069 | 5.804 | 0.3249 | 0.0605  | 0.0082  |
| 1IPP | C94  | 294 | 5.100 | 5.312 | 5.738 | 0.2928 | 0.0237  | 0.0221  |
| 1IPP | C95  | 295 | 4.810 | 5.332 | 5.797 | 0.2924 | -0.0074 | 0.0523  |
| 1IPP | C96  | 296 | 4.682 | 5.483 | 6.017 | 0.2918 | -0.0246 | 0.0534  |
| 1IPP | C97  | 297 | 4.757 | 5.391 | 6.287 | 0.3233 | -0.0094 | 0.0589  |
| 1IPP | C98  | 298 | 4.619 | 5.158 | 6.407 | 0.3868 | -0.0304 | 0.0690  |
| 1IPP | C99  | 299 | 4.389 | 5.266 | 6.559 | 0.3661 | -0.0518 | 0.0891  |
| 1IPP | C100 | 300 | 4.464 | 5.373 | 6.825 | 0.3869 | -0.0473 | 0.0848  |
| 1IPP | C1   | 301 | 5.582 | 5.401 | 5.868 | 0.2840 | 0.1010  | -0.0330 |
| 1IPP | C2   | 302 | 5.823 | 5.229 | 5.865 | 0.3035 | 0.1456  | -0.0491 |
| 1IPP | C3   | 303 | 5.845 | 4.979 | 5.704 | 0.3329 | 0.1450  | -0.0534 |
| 1IPP | C4   | 304 | 5.996 | 4.953 | 5.450 | 0.3067 | 0.1674  | -0.0653 |
| 1IPP | C5   | 305 | 5.858 | 4.911 | 5.192 | 0.2890 | 0.1376  | -0.0430 |
| 1IPP | C6   | 306 | 5.715 | 4.653 | 5.220 | 0.3439 | 0.1079  | -0.0298 |
| 1IPP | C7   | 307 | 5.845 | 4.390 | 5.175 | 0.3724 | 0.1382  | -0.0318 |
| 1IPP | C8   | 308 | 5.840 | 4.294 | 4.895 | 0.3623 | 0.1318  | -0.0295 |
| 1IPP | C9   | 309 | 5.571 | 4.186 | 4.824 | 0.3648 | 0.0781  | -0.0038 |
| 1IPP | C10  | 310 | 5.494 | 3.936 | 4.968 | 0.4216 | 0.0772  | 0.0221  |
| 1IPP | C11  | 311 | 5.260 | 3.894 | 5.149 | 0.4499 | 0.0438  | 0.0402  |
| 1IPP | C12  | 312 | 5.238 | 3.973 | 5.435 | 0.4646 | 0.0455  | 0.0385  |
| 1IPP | C13  | 313 | 5.039 | 4.188 | 5.484 | 0.4308 | 0.0030  | 0.0558  |
| 1IPP | C14  | 314 | 4.771 | 4.061 | 5.482 | 0.4623 | -0.0264 | 0.0810  |
| 1IPP | C15  | 315 | 4.747 | 3.995 | 5.193 | 0.4339 | -0.0390 | 0.0822  |
| 1IPP | C16  | 316 | 4.788 | 4.230 | 5.016 | 0.3859 | -0.0278 | 0.0823  |
| 1IPP | C17  | 317 | 5.063 | 4.259 | 4.906 | 0.3606 | -0.0019 | 0.0401  |
| 1IPP | C18  | 318 | 5.264 | 4.349 | 5.105 | 0.3751 | 0.0429  | 0.0307  |
| 1IPP | C19  | 319 | 5.174 | 4.570 | 5.282 | 0.3607 | 0.0388  | 0.0342  |
| 1IPP | C20  | 320 | 5.188 | 4.848 | 5.187 | 0.3072 | 0.0275  | 0.0176  |
| 1IPP | C21  | 321 | 5.435 | 5.011 | 5.205 | 0.2752 | 0.0709  | 0.0007  |
| 1IPP | C22  | 322 | 5.507 | 5.165 | 5.447 | 0.2859 | 0.0962  | -0.0219 |
| 1IPP | C23  | 323 | 5.426 | 5.450 | 5.461 | 0.2407 | 0.0664  | -0.0113 |
| 1IPP | C24  | 324 | 5.651 | 5.619 | 5.370 | 0.1992 | 0.1042  | -0.0491 |
| 1IPP | C25  | 325 | 5.886 | 5.570 | 5.546 | 0.2330 | 0.1494  | -0.0663 |
| 1IPP | C26  | 326 | 6.121 | 5.394 | 5.491 | 0.2431 | 0.1892  | -0.0808 |
| 1IPP | C27  | 327 | 6.358 | 5.523 | 5.367 | 0.2161 | 0.2262  | -0.1036 |
| 1IPP | C28  | 328 | 6.372 | 5.478 | 5.074 | 0.2025 | 0.2113  | -0.1163 |
| 1IPP | C29  | 329 | 6.619 | 5.430 | 4.915 | 0.1856 | 0.2459  | -0.1328 |
| 1IPP | C30  | 330 | 6.706 | 5.662 | 4.752 | 0.1244 | 0.2641  | -0.1529 |
| 1IPP | C31  | 331 | 6.775 | 5.926 | 4.870 | 0.1098 | 0.2853  | -0.1552 |
| 1IPP | C32  | 332 | 6.509 | 6.044 | 4.922 | 0.0904 | 0.2269  | -0.1360 |
| 1IPP | C33  | 333 | 6.343 | 6.051 | 4.675 | 0.0675 | 0.2057  | -0.1256 |
| 1IPP | C34  | 334 | 6.168 | 5.811 | 4.649 | 0.0951 | 0.1741  | -0.0957 |
| 1IPP | C35  | 335 | 6.257 | 5.525 | 4.655 | 0.1517 | 0.1783  | -0.1039 |
| 1IPP | C36  | 336 | 6.387 | 5.371 | 4.436 | 0.1438 | 0.2005  | -0.1108 |
| 1IPP | C37  | 337 | 6.682 | 5.318 | 4.425 | 0.1520 | 0.2447  | -0.1350 |
| 1IPP | C38  | 338 | 6.874 | 5.533 | 4.349 | 0.1120 | 0.2800  | -0.1692 |
| 1IPP | C39  | 339 | 6.896 | 5.684 | 4.093 | 0.0633 | 0.2662  | -0.1703 |
| 1IPP | C40  | 340 | 7.074 | 5.620 | 3.864 | 0.0471 | 0.3004  | -0.1853 |
| 1IPP | C41  | 341 | 6.932 | 5.590 | 3.605 | 0.0225 | 0.2687  | -0.1661 |
| 1IPP | C42  | 342 | 6.765 | 5.348 | 3.566 | 0.0649 | 0.2435  | -0.1426 |
| 1IPP | C43  | 343 | 6.522 | 5.370 | 3.735 | 0.0714 | 0.2073  | -0.1191 |
| 1IPP | C44  | 344 | 6.560 | 5.253 | 4.006 | 0.1228 | 0.2235  | -0.1412 |
| 1IPP | C45  | 345 | 6.430 | 4.999 | 4.090 | 0.1730 | 0.2017  | -0.1087 |
| 1IPP | C46  | 346 | 6.144 | 5.018 | 4.172 | 0.1724 | 0.1577  | -0.0782 |
| 1IPP | C47  | 347 | 6.041 | 5.050 | 4.449 | 0.1998 | 0.1530  | -0.0653 |
| 1IPP | C48  | 348 | 5.992 | 4.808 | 4.618 | 0.2484 | 0.1511  | -0.0598 |
| 1IPP | C49  | 349 | 5.731 | 4.665 | 4.638 | 0.2821 | 0.0973  | -0.0265 |
| 1IPP | C50  | 350 | 5.521 | 4.751 | 4.832 | 0.2800 | 0.0884  | -0.0019 |
| 1IPP | C51  | 351 | 5.323 | 4.962 | 4.763 | 0.2471 | 0.0430  | 0.0087  |
| 1IPP | C52  | 352 | 5.427 | 5.240 | 4.748 | 0.1949 | 0.0638  | -0.0132 |
| 1IPP | C53  | 353 | 5.438 | 5.406 | 4.994 | 0.1940 | 0.0602  | -0.0115 |
| 1IPP | C54  | 354 | 5.240 | 5.613 | 5.072 | 0.1745 | 0.0437  | 0.0045  |
| 1IPP | C55  | 355 | 5.311 | 5.881 | 4.970 | 0.1297 | 0.0442  | -0.0021 |
| 1IPP | C56  | 356 | 5.547 | 6.014 | 5.088 | 0.1060 | 0.0802  | -0.0484 |
| 1IPP | C57  | 357 | 5.513 | 6.201 | 5.316 | 0.1056 | 0.0835  | -0.0379 |
| 1IPP | C58  | 358 | 5.705 | 6.216 | 5.541 | 0.1298 | 0.1224  | -0.0617 |
| 1IPP | C59  | 359 | 5.692 | 5.950 | 5.669 | 0.1808 | 0.1140  | -0.0592 |
| 1IPP | C60  | 360 | 5.496 | 5.866 | 5.873 | 0.2094 | 0.0950  | -0.0274 |

|      |      |     |       |       |       |         |        |         |
|------|------|-----|-------|-------|-------|---------|--------|---------|
| 1IPP | C61  | 361 | 5.593 | 5.866 | 6.153 | 0.2367  | 0.1196 | -0.0406 |
| 1IPP | C62  | 362 | 5.731 | 5.617 | 6.231 | 0.2774  | 0.1383 | -0.0440 |
| 1IPP | C63  | 363 | 6.026 | 5.604 | 6.215 | 0.2943  | 0.1875 | -0.0790 |
| 1IPP | C64  | 364 | 6.131 | 5.560 | 5.941 | 0.2733  | 0.2005 | -0.0949 |
| 1IPP | C65  | 365 | 6.283 | 5.751 | 5.771 | 0.2224  | 0.2125 | -0.1061 |
| 1IPP | C66  | 366 | 6.168 | 5.973 | 5.608 | 0.1740  | 0.2005 | -0.1071 |
| 1IPP | C67  | 367 | 6.015 | 5.954 | 5.354 | 0.1502  | 0.1643 | -0.0979 |
| 1IPP | C68  | 368 | 6.120 | 5.864 | 5.093 | 0.1397  | 0.1846 | -0.0898 |
| 1IPP | C69  | 369 | 5.898 | 5.698 | 4.986 | 0.1473  | 0.1328 | -0.0735 |
| 1IPP | C70  | 370 | 5.883 | 5.411 | 5.058 | 0.1996  | 0.1436 | -0.0592 |
| 1IPP | C71  | 371 | 5.957 | 5.202 | 4.863 | 0.2204  | 0.1376 | -0.0661 |
| 1IPP | C72  | 372 | 6.215 | 5.067 | 4.917 | 0.2442  | 0.1931 | -0.0888 |
| 1IPP | C73  | 373 | 6.452 | 5.062 | 4.738 | 0.2222  | 0.2189 | -0.1132 |
| 1IPP | C74  | 374 | 6.465 | 4.854 | 4.527 | 0.2357  | 0.2149 | -0.1057 |
| 1IPP | C75  | 375 | 6.551 | 4.604 | 4.662 | 0.2803  | 0.2308 | -0.1060 |
| 1IPP | C76  | 376 | 6.320 | 4.476 | 4.797 | 0.3269  | 0.2057 | -0.0781 |
| 1IPP | C77  | 377 | 6.188 | 4.637 | 5.008 | 0.3141  | 0.1829 | -0.0788 |
| 1IPP | C78  | 378 | 6.305 | 4.680 | 5.278 | 0.3371  | 0.2137 | -0.0908 |
| 1IPP | C79  | 379 | 6.252 | 4.461 | 5.471 | 0.3928  | 0.2052 | -0.0728 |
| 1IPP | C80  | 380 | 5.986 | 4.479 | 5.599 | 0.4064  | 0.1632 | -0.0470 |
| 1IPP | C81  | 381 | 5.953 | 4.530 | 5.888 | 0.4196  | 0.1563 | -0.0318 |
| 1IPP | C82  | 382 | 5.928 | 4.278 | 6.042 | 0.4769  | 0.1751 | -0.0403 |
| 1IPP | C83  | 383 | 5.662 | 4.157 | 5.990 | 0.4963  | 0.1270 | -0.0118 |
| 1IPP | C84  | 384 | 5.629 | 3.966 | 5.765 | 0.4967  | 0.1193 | -0.0043 |
| 1IPP | C85  | 385 | 5.684 | 4.121 | 5.518 | 0.4411  | 0.1182 | -0.0044 |
| 1IPP | C86  | 386 | 5.490 | 4.345 | 5.505 | 0.4148  | 0.0760 | 0.0081  |
| 1IPP | C87  | 387 | 5.553 | 4.605 | 5.633 | 0.3930  | 0.1041 | -0.0116 |
| 1IPP | C88  | 388 | 5.496 | 4.622 | 5.924 | 0.4078  | 0.0943 | 0.0009  |
| 1IPP | C89  | 389 | 5.607 | 4.859 | 6.064 | 0.3889  | 0.1182 | -0.0187 |
| 1IPP | C90  | 390 | 5.890 | 4.867 | 6.156 | 0.4001  | 0.1684 | -0.0514 |
| 1IPP | C91  | 391 | 5.978 | 4.755 | 6.417 | 0.4406  | 0.1727 | -0.0587 |
| 1IPP | C92  | 392 | 6.023 | 4.956 | 6.630 | 0.4389  | 0.2005 | -0.0574 |
| 1IPP | C93  | 393 | 6.283 | 5.086 | 6.571 | 0.3996  | 0.2292 | -0.0875 |
| 1IPP | C94  | 394 | 6.305 | 5.289 | 6.355 | 0.3568  | 0.2389 | -0.1108 |
| 1IPP | C95  | 395 | 6.419 | 5.241 | 6.085 | 0.3231  | 0.2396 | -0.1031 |
| 1IPP | C96  | 396 | 6.280 | 5.138 | 5.841 | 0.3328  | 0.2290 | -0.0957 |
| 1IPP | C97  | 397 | 6.276 | 4.847 | 5.773 | 0.3644  | 0.2129 | -0.0867 |
| 1IPP | C98  | 398 | 6.549 | 4.737 | 5.752 | 0.3769  | 0.2560 | -0.1124 |
| 1IPP | C99  | 399 | 6.703 | 4.735 | 5.499 | 0.3588  | 0.2784 | -0.1242 |
| 1IPP | C100 | 400 | 6.709 | 4.469 | 5.365 | 0.3790  | 0.2671 | -0.1178 |
| 1IPP | C1   | 401 | 6.139 | 9.077 | 5.825 | -0.2846 | 0.1964 | -0.1742 |
| 1IPP | C2   | 402 | 6.391 | 9.181 | 5.707 | -0.3258 | 0.2343 | -0.1916 |
| 1IPP | C3   | 403 | 6.468 | 9.050 | 5.452 | -0.3234 | 0.2412 | -0.2121 |
| 1IPP | C4   | 404 | 6.637 | 8.808 | 5.424 | -0.2875 | 0.2622 | -0.2189 |
| 1IPP | C5   | 405 | 6.497 | 8.546 | 5.433 | -0.2419 | 0.2461 | -0.1988 |
| 1IPP | C6   | 406 | 6.476 | 8.381 | 5.679 | -0.2052 | 0.2369 | -0.1836 |
| 1IPP | C7   | 407 | 6.720 | 8.270 | 5.803 | -0.1574 | 0.2835 | -0.2067 |
| 1IPP | C8   | 408 | 6.839 | 8.034 | 5.669 | -0.1509 | 0.3013 | -0.2216 |
| 1IPP | C9   | 409 | 7.116 | 8.069 | 5.570 | -0.1582 | 0.3450 | -0.2529 |
| 1IPP | C10  | 410 | 7.353 | 7.931 | 5.682 | -0.1321 | 0.3973 | -0.2585 |
| 1IPP | C11  | 411 | 7.463 | 8.030 | 5.938 | -0.1133 | 0.3981 | -0.2754 |
| 1IPP | C12  | 412 | 7.300 | 7.920 | 6.160 | -0.0854 | 0.3939 | -0.2601 |
| 1IPP | C13  | 413 | 7.041 | 8.036 | 6.078 | -0.1007 | 0.3394 | -0.2373 |
| 1IPP | C14  | 414 | 7.095 | 8.326 | 6.075 | -0.1477 | 0.3488 | -0.2451 |
| 1IPP | C15  | 415 | 7.147 | 8.452 | 5.813 | -0.1923 | 0.3602 | -0.2588 |
| 1IPP | C16  | 416 | 7.424 | 8.466 | 5.706 | -0.2058 | 0.3862 | -0.2784 |
| 1IPP | C17  | 417 | 7.564 | 8.723 | 5.755 | -0.2360 | 0.4125 | -0.3095 |
| 1IPP | C18  | 418 | 7.490 | 8.968 | 5.601 | -0.2946 | 0.3975 | -0.3084 |
| 1IPP | C19  | 419 | 7.303 | 9.175 | 5.708 | -0.3234 | 0.3727 | -0.2849 |
| 1IPP | C20  | 420 | 7.006 | 9.180 | 5.681 | -0.3295 | 0.3336 | -0.2570 |
| 1IPP | C21  | 421 | 6.859 | 9.033 | 5.893 | -0.2811 | 0.3126 | -0.2569 |
| 1IPP | C22  | 422 | 6.782 | 8.750 | 5.857 | -0.2415 | 0.2972 | -0.2262 |
| 1IPP | C23  | 423 | 6.487 | 8.765 | 5.848 | -0.2373 | 0.2522 | -0.2036 |
| 1IPP | C24  | 424 | 6.325 | 8.665 | 6.074 | -0.2037 | 0.2290 | -0.1781 |
| 1IPP | C25  | 425 | 6.268 | 8.379 | 6.124 | -0.1599 | 0.2300 | -0.1694 |
| 1IPP | C26  | 426 | 6.092 | 8.237 | 5.933 | -0.1545 | 0.1881 | -0.1450 |
| 1IPP | C27  | 427 | 5.799 | 8.272 | 5.920 | -0.1589 | 0.1463 | -0.1153 |
| 1IPP | C28  | 428 | 5.699 | 8.126 | 6.157 | -0.1085 | 0.1381 | -0.1034 |
| 1IPP | C29  | 429 | 5.814 | 7.858 | 6.193 | -0.0819 | 0.1516 | -0.1139 |
| 1IPP | C30  | 430 | 6.111 | 7.849 | 6.184 | -0.0531 | 0.1996 | -0.1333 |
| 1IPP | C31  | 431 | 6.260 | 7.868 | 6.438 | -0.0445 | 0.2390 | -0.1614 |
| 1IPP | C32  | 432 | 6.302 | 8.130 | 6.569 | -0.0723 | 0.2331 | -0.1701 |
| 1IPP | C33  | 433 | 6.084 | 8.110 | 6.769 | -0.0521 | 0.2128 | -0.1465 |

|      |      |     |       |       |       |         |        |         |
|------|------|-----|-------|-------|-------|---------|--------|---------|
| 1IPP | C34  | 434 | 5.841 | 8.018 | 6.626 | -0.0371 | 0.1626 | -0.1065 |
| 1IPP | C35  | 435 | 5.772 | 7.729 | 6.655 | 0.0031  | 0.1624 | -0.1049 |
| 1IPP | C36  | 436 | 5.974 | 7.531 | 6.566 | 0.0259  | 0.1841 | -0.1170 |
| 1IPP | C37  | 437 | 6.135 | 7.376 | 6.761 | 0.0665  | 0.2161 | -0.1294 |
| 1IPP | C38  | 438 | 6.300 | 7.571 | 6.913 | 0.0512  | 0.2466 | -0.1485 |
| 1IPP | C39  | 439 | 6.516 | 7.698 | 6.755 | 0.0216  | 0.2776 | -0.1831 |
| 1IPP | C40  | 440 | 6.804 | 7.625 | 6.756 | 0.0235  | 0.3165 | -0.2056 |
| 1IPP | C41  | 441 | 6.911 | 7.859 | 6.905 | 0.0066  | 0.3416 | -0.2128 |
| 1IPP | C42  | 442 | 6.828 | 8.092 | 6.741 | -0.0474 | 0.3356 | -0.2124 |
| 1IPP | C43  | 443 | 7.003 | 8.145 | 6.508 | -0.0763 | 0.3393 | -0.2375 |
| 1IPP | C44  | 444 | 7.219 | 8.347 | 6.520 | -0.1090 | 0.3873 | -0.2708 |
| 1IPP | C45  | 445 | 7.109 | 8.622 | 6.499 | -0.1591 | 0.3594 | -0.2541 |
| 1IPP | C46  | 446 | 7.030 | 8.731 | 6.234 | -0.1956 | 0.3521 | -0.2524 |
| 1IPP | C47  | 447 | 7.236 | 8.840 | 6.049 | -0.2338 | 0.3625 | -0.2778 |
| 1IPP | C48  | 448 | 7.312 | 9.098 | 6.174 | -0.2508 | 0.3975 | -0.2829 |
| 1IPP | C49  | 449 | 7.077 | 9.277 | 6.197 | -0.2806 | 0.3599 | -0.2786 |
| 1IPP | C50  | 450 | 6.875 | 9.180 | 6.394 | -0.2657 | 0.3185 | -0.2330 |
| 1IPP | C51  | 451 | 6.669 | 8.983 | 6.308 | -0.2285 | 0.2949 | -0.2177 |
| 1IPP | C52  | 452 | 6.427 | 9.088 | 6.172 | -0.2557 | 0.2465 | -0.1948 |
| 1IPP | C53  | 453 | 6.151 | 9.099 | 6.287 | -0.2527 | 0.2089 | -0.1685 |
| 1IPP | C54  | 454 | 5.978 | 8.855 | 6.281 | -0.2166 | 0.1710 | -0.1646 |
| 1IPP | C55  | 455 | 5.867 | 8.737 | 6.030 | -0.2100 | 0.1597 | -0.1204 |
| 1IPP | C56  | 456 | 5.594 | 8.778 | 5.919 | -0.2435 | 0.1139 | -0.1042 |
| 1IPP | C57  | 457 | 5.382 | 8.589 | 6.009 | -0.2062 | 0.0852 | -0.0852 |
| 1IPP | C58  | 458 | 5.363 | 8.323 | 5.877 | -0.1725 | 0.0775 | -0.0768 |
| 1IPP | C59  | 459 | 5.153 | 8.246 | 5.683 | -0.1788 | 0.0406 | -0.0578 |
| 1IPP | C60  | 460 | 4.932 | 8.081 | 5.794 | -0.1387 | 0.0093 | -0.0224 |
| 1IPP | C61  | 461 | 5.049 | 7.824 | 5.888 | -0.0916 | 0.0191 | -0.0401 |
| 1IPP | C62  | 462 | 5.106 | 7.766 | 6.174 | -0.0566 | 0.0440 | -0.0252 |
| 1IPP | C63  | 463 | 5.361 | 7.844 | 6.309 | -0.0485 | 0.0921 | -0.0729 |
| 1IPP | C64  | 464 | 5.399 | 8.057 | 6.515 | -0.0674 | 0.1068 | -0.0701 |
| 1IPP | C65  | 465 | 5.427 | 8.353 | 6.485 | -0.1113 | 0.0948 | -0.0771 |
| 1IPP | C66  | 466 | 5.657 | 8.499 | 6.362 | -0.1523 | 0.1339 | -0.1105 |
| 1IPP | C67  | 467 | 5.936 | 8.415 | 6.426 | -0.1196 | 0.1769 | -0.1359 |
| 1IPP | C68  | 468 | 6.120 | 8.552 | 6.615 | -0.1304 | 0.2022 | -0.1596 |
| 1IPP | C69  | 469 | 6.367 | 8.685 | 6.514 | -0.1666 | 0.2442 | -0.1819 |
| 1IPP | C70  | 470 | 6.617 | 8.523 | 6.495 | -0.1301 | 0.2905 | -0.2000 |
| 1IPP | C71  | 471 | 6.697 | 8.365 | 6.257 | -0.1437 | 0.2957 | -0.2054 |
| 1IPP | C72  | 472 | 6.601 | 8.085 | 6.219 | -0.0954 | 0.2702 | -0.1930 |
| 1IPP | C73  | 473 | 6.696 | 7.841 | 6.361 | -0.0428 | 0.2957 | -0.2074 |
| 1IPP | C74  | 474 | 6.904 | 7.648 | 6.272 | -0.0237 | 0.3228 | -0.2084 |
| 1IPP | C75  | 475 | 6.849 | 7.386 | 6.140 | 0.0008  | 0.3235 | -0.2068 |
| 1IPP | C76  | 476 | 6.932 | 7.138 | 6.280 | 0.0527  | 0.3235 | -0.2129 |
| 1IPP | C77  | 477 | 7.228 | 7.159 | 6.266 | 0.0478  | 0.3663 | -0.2320 |
| 1IPP | C78  | 478 | 7.317 | 7.237 | 5.994 | 0.0119  | 0.3856 | -0.2392 |
| 1IPP | C79  | 479 | 7.287 | 7.526 | 5.928 | -0.0332 | 0.3716 | -0.2514 |
| 1IPP | C80  | 480 | 7.033 | 7.652 | 5.836 | -0.0795 | 0.3382 | -0.2328 |
| 1IPP | C81  | 481 | 6.894 | 7.594 | 5.580 | -0.0913 | 0.3054 | -0.2185 |
| 1IPP | C82  | 482 | 7.015 | 7.688 | 5.326 | -0.1330 | 0.3203 | -0.2273 |
| 1IPP | C83  | 483 | 6.928 | 7.934 | 5.185 | -0.1799 | 0.3006 | -0.2229 |
| 1IPP | C84  | 484 | 6.751 | 7.935 | 4.947 | -0.2118 | 0.2701 | -0.2088 |
| 1IPP | C85  | 485 | 6.898 | 7.951 | 4.690 | -0.2310 | 0.2933 | -0.2220 |
| 1IPP | C86  | 486 | 6.988 | 8.222 | 4.611 | -0.2800 | 0.3066 | -0.2335 |
| 1IPP | C87  | 487 | 6.733 | 8.370 | 4.599 | -0.3103 | 0.2576 | -0.2183 |
| 1IPP | C88  | 488 | 6.504 | 8.216 | 4.490 | -0.2922 | 0.2262 | -0.1726 |
| 1IPP | C89  | 489 | 6.362 | 8.031 | 4.673 | -0.2420 | 0.2070 | -0.1668 |
| 1IPP | C90  | 490 | 6.213 | 8.151 | 4.899 | -0.2307 | 0.1812 | -0.1578 |
| 1IPP | C91  | 491 | 6.389 | 8.243 | 5.120 | -0.2418 | 0.2188 | -0.1771 |
| 1IPP | C92  | 492 | 6.503 | 8.085 | 5.344 | -0.1924 | 0.2453 | -0.1823 |
| 1IPP | C93  | 493 | 6.323 | 7.978 | 5.556 | -0.1455 | 0.2220 | -0.1703 |
| 1IPP | C94  | 494 | 6.409 | 7.945 | 5.837 | -0.1068 | 0.2272 | -0.1752 |
| 1IPP | C95  | 495 | 6.575 | 7.714 | 5.922 | -0.0738 | 0.2714 | -0.1813 |
| 1IPP | C96  | 496 | 6.420 | 7.471 | 5.997 | -0.0250 | 0.2423 | -0.1506 |
| 1IPP | C97  | 497 | 6.348 | 7.456 | 6.284 | 0.0072  | 0.2384 | -0.1562 |
| 1IPP | C98  | 498 | 6.543 | 7.343 | 6.478 | 0.0455  | 0.2605 | -0.1645 |
| 1IPP | C99  | 499 | 6.550 | 7.055 | 6.553 | 0.0930  | 0.2859 | -0.1736 |
| 1IPP | C100 | 500 | 6.371 | 6.974 | 6.777 | 0.1329  | 0.2556 | -0.1469 |
| 1IPP | C1   | 501 | 6.208 | 6.521 | 6.703 | 0.1862  | 0.2250 | -0.1255 |
| 1IPP | C2   | 502 | 6.325 | 6.647 | 6.460 | 0.1448  | 0.2448 | -0.1362 |
| 1IPP | C3   | 503 | 6.188 | 6.645 | 6.197 | 0.1316  | 0.2101 | -0.1105 |
| 1IPP | C4   | 504 | 6.288 | 6.449 | 5.997 | 0.1228  | 0.2199 | -0.1283 |
| 1IPP | C5   | 505 | 6.521 | 6.524 | 5.827 | 0.1065  | 0.2560 | -0.1445 |
| 1IPP | C6   | 506 | 6.368 | 6.640 | 5.605 | 0.0667  | 0.2244 | -0.1325 |

|      |     |     |       |       |       |         |         |         |
|------|-----|-----|-------|-------|-------|---------|---------|---------|
| 1IPP | C7  | 507 | 6.190 | 6.438 | 5.482 | 0.0849  | 0.2009  | -0.1069 |
| 1IPP | C8  | 508 | 6.310 | 6.281 | 5.261 | 0.0864  | 0.1989  | -0.1232 |
| 1IPP | C9  | 509 | 6.183 | 6.328 | 4.999 | 0.0569  | 0.1828  | -0.1156 |
| 1IPP | C10 | 510 | 5.896 | 6.270 | 5.029 | 0.0621  | 0.1388  | -0.0803 |
| 1IPP | C11 | 511 | 5.701 | 6.491 | 5.017 | 0.0277  | 0.1098  | -0.0572 |
| 1IPP | C12 | 512 | 5.678 | 6.664 | 5.256 | 0.0264  | 0.1172  | -0.0719 |
| 1IPP | C13 | 513 | 5.512 | 6.619 | 5.497 | 0.0548  | 0.0921  | -0.0473 |
| 1IPP | C14 | 514 | 5.658 | 6.682 | 5.748 | 0.0731  | 0.1231  | -0.0700 |
| 1IPP | C15 | 515 | 5.867 | 6.504 | 5.859 | 0.1128  | 0.1502  | -0.0778 |
| 1IPP | C16 | 516 | 5.798 | 6.261 | 6.014 | 0.1672  | 0.1434  | -0.0714 |
| 1IPP | C17 | 517 | 5.981 | 6.028 | 6.003 | 0.2021  | 0.1762  | -0.0781 |
| 1IPP | C18 | 518 | 6.185 | 6.040 | 6.216 | 0.2146  | 0.2152  | -0.0972 |
| 1IPP | C19 | 519 | 6.049 | 5.982 | 6.473 | 0.2552  | 0.2018  | -0.0913 |
| 1IPP | C20 | 520 | 5.803 | 6.146 | 6.457 | 0.2327  | 0.1515  | -0.0663 |
| 1IPP | C21 | 521 | 5.823 | 6.441 | 6.472 | 0.1841  | 0.1632  | -0.0705 |
| 1IPP | C22 | 522 | 5.739 | 6.537 | 6.740 | 0.1868  | 0.1512  | -0.0771 |
| 1IPP | C23 | 523 | 5.446 | 6.493 | 6.749 | 0.2006  | 0.1038  | -0.0436 |
| 1IPP | C24 | 524 | 5.307 | 6.713 | 6.610 | 0.1525  | 0.0817  | -0.0310 |
| 1IPP | C25 | 525 | 5.264 | 6.610 | 6.335 | 0.1385  | 0.0707  | -0.0273 |
| 1IPP | C26 | 526 | 5.518 | 6.596 | 6.183 | 0.1348  | 0.1101  | -0.0595 |
| 1IPP | C27 | 527 | 5.662 | 6.853 | 6.187 | 0.0916  | 0.1364  | -0.0671 |
| 1IPP | C28 | 528 | 5.551 | 7.087 | 6.044 | 0.0431  | 0.1084  | -0.0607 |
| 1IPP | C29 | 529 | 5.654 | 7.188 | 5.785 | -0.0053 | 0.1179  | -0.0805 |
| 1IPP | C30 | 530 | 5.896 | 7.354 | 5.730 | -0.0230 | 0.1538  | -0.0987 |
| 1IPP | C31 | 531 | 5.959 | 7.633 | 5.815 | -0.0655 | 0.1681  | -0.1178 |
| 1IPP | C32 | 532 | 5.780 | 7.848 | 5.716 | -0.1026 | 0.1449  | -0.1056 |
| 1IPP | C33 | 533 | 5.518 | 7.843 | 5.857 | -0.0970 | 0.0969  | -0.0705 |
| 1IPP | C34 | 534 | 5.441 | 7.570 | 5.947 | -0.0456 | 0.0900  | -0.0725 |
| 1IPP | C35 | 535 | 5.238 | 7.372 | 5.852 | -0.0154 | 0.0552  | -0.0412 |
| 1IPP | C36 | 536 | 4.950 | 7.390 | 5.924 | -0.0192 | 0.0258  | -0.0109 |
| 1IPP | C37 | 537 | 4.827 | 7.388 | 6.196 | 0.0143  | -0.0062 | 0.0046  |
| 1IPP | C38 | 538 | 4.685 | 7.156 | 6.315 | 0.0586  | -0.0215 | 0.0285  |
| 1IPP | C39 | 539 | 4.450 | 7.061 | 6.160 | 0.0464  | -0.0580 | 0.0393  |
| 1IPP | C40 | 540 | 4.581 | 6.843 | 6.008 | 0.0745  | -0.0507 | 0.0479  |
| 1IPP | C41 | 541 | 4.740 | 6.944 | 5.779 | 0.0347  | -0.0185 | 0.0177  |
| 1IPP | C42 | 542 | 4.655 | 6.849 | 5.512 | 0.0209  | -0.0440 | 0.0200  |
| 1IPP | C43 | 543 | 4.748 | 6.568 | 5.483 | 0.0626  | -0.0240 | 0.0258  |
| 1IPP | C44 | 544 | 5.034 | 6.488 | 5.456 | 0.0763  | 0.0159  | -0.0012 |
| 1IPP | C45 | 545 | 5.189 | 6.292 | 5.617 | 0.1187  | 0.0391  | -0.0055 |
| 1IPP | C46 | 546 | 5.328 | 6.357 | 5.870 | 0.1362  | 0.0743  | -0.0218 |
| 1IPP | C47 | 547 | 5.299 | 6.186 | 6.111 | 0.1840  | 0.0796  | -0.0211 |
| 1IPP | C48 | 548 | 5.083 | 6.152 | 6.311 | 0.2094  | 0.0511  | 0.0058  |
| 1IPP | C49 | 549 | 5.066 | 6.279 | 6.579 | 0.2264  | 0.0465  | -0.0011 |
| 1IPP | C50 | 550 | 4.843 | 6.473 | 6.603 | 0.1908  | 0.0130  | 0.0175  |
| 1IPP | C51 | 551 | 4.859 | 6.748 | 6.493 | 0.1337  | 0.0095  | 0.0110  |
| 1IPP | C52 | 552 | 4.921 | 6.962 | 6.687 | 0.1286  | 0.0273  | -0.0048 |
| 1IPP | C53 | 553 | 4.747 | 7.172 | 6.806 | 0.1032  | 0.0118  | 0.0212  |
| 1IPP | C54 | 554 | 4.749 | 7.435 | 6.667 | 0.0448  | -0.0013 | 0.0029  |
| 1IPP | C55 | 555 | 5.010 | 7.552 | 6.583 | 0.0187  | 0.0380  | -0.0263 |
| 1IPP | C56 | 556 | 5.218 | 7.645 | 6.774 | 0.0277  | 0.0820  | -0.0418 |
| 1IPP | C57 | 557 | 5.426 | 7.433 | 6.781 | 0.0759  | 0.1057  | -0.0550 |
| 1IPP | C58 | 558 | 5.294 | 7.167 | 6.792 | 0.1021  | 0.0842  | -0.0358 |
| 1IPP | C59 | 559 | 5.250 | 7.017 | 7.045 | 0.1520  | 0.0803  | -0.0284 |
| 1IPP | C60 | 560 | 5.449 | 6.799 | 7.075 | 0.1873  | 0.1173  | -0.0494 |
| 1IPP | C61 | 561 | 5.724 | 6.906 | 7.105 | 0.1750  | 0.1669  | -0.0832 |
| 1IPP | C62 | 562 | 5.752 | 7.120 | 6.901 | 0.1222  | 0.1544  | -0.0850 |
| 1IPP | C63 | 563 | 5.703 | 7.016 | 6.627 | 0.0971  | 0.1500  | -0.0686 |
| 1IPP | C64 | 564 | 5.951 | 6.888 | 6.527 | 0.1221  | 0.1849  | -0.0990 |
| 1IPP | C65 | 565 | 6.125 | 7.085 | 6.391 | 0.0829  | 0.2028  | -0.1151 |
| 1IPP | C66 | 566 | 5.971 | 7.185 | 6.160 | 0.0323  | 0.1800  | -0.1244 |
| 1IPP | C67 | 567 | 5.806 | 7.428 | 6.178 | 0.0011  | 0.1486  | -0.1040 |
| 1IPP | C68 | 568 | 5.578 | 7.421 | 6.367 | 0.0204  | 0.1223  | -0.0802 |
| 1IPP | C69 | 569 | 5.294 | 7.352 | 6.316 | 0.0204  | 0.0721  | -0.0344 |
| 1IPP | C70 | 570 | 5.185 | 7.078 | 6.344 | 0.0689  | 0.0624  | -0.0306 |
| 1IPP | C71 | 571 | 5.027 | 6.954 | 6.126 | 0.0649  | 0.0227  | -0.0121 |
| 1IPP | C72 | 572 | 5.104 | 6.735 | 5.943 | 0.0841  | 0.0384  | -0.0108 |
| 1IPP | C73 | 573 | 5.271 | 6.890 | 5.755 | 0.0451  | 0.0581  | -0.0280 |
| 1IPP | C74 | 574 | 5.139 | 7.054 | 5.549 | -0.0119 | 0.0356  | -0.0191 |
| 1IPP | C75 | 575 | 5.056 | 6.894 | 5.317 | -0.0013 | 0.0123  | -0.0095 |
| 1IPP | C76 | 576 | 5.253 | 6.753 | 5.147 | 0.0070  | 0.0360  | -0.0327 |
| 1IPP | C77 | 577 | 5.393 | 6.871 | 4.915 | -0.0429 | 0.0576  | -0.0390 |
| 1IPP | C78 | 578 | 5.652 | 7.015 | 4.937 | -0.0600 | 0.0952  | -0.0689 |
| 1IPP | C79 | 579 | 5.909 | 6.878 | 4.882 | -0.0480 | 0.1353  | -0.1012 |

|      |      |     |       |       |       |         |         |         |
|------|------|-----|-------|-------|-------|---------|---------|---------|
| 1IPP | C80  | 580 | 6.080 | 6.738 | 5.083 | -0.0031 | 0.1761  | -0.1062 |
| 1IPP | C81  | 581 | 6.330 | 6.837 | 5.205 | -0.0164 | 0.2065  | -0.1369 |
| 1IPP | C82  | 582 | 6.615 | 6.751 | 5.177 | 0.0041  | 0.2582  | -0.1707 |
| 1IPP | C83  | 583 | 6.761 | 6.610 | 5.395 | 0.0535  | 0.2784  | -0.1782 |
| 1IPP | C84  | 584 | 6.760 | 6.314 | 5.434 | 0.0974  | 0.2893  | -0.1650 |
| 1IPP | C85  | 585 | 6.574 | 6.139 | 5.589 | 0.1447  | 0.2546  | -0.1312 |
| 1IPP | C86  | 586 | 6.564 | 6.094 | 5.884 | 0.1730  | 0.2633  | -0.1508 |
| 1IPP | C87  | 587 | 6.730 | 5.917 | 6.056 | 0.2189  | 0.2877  | -0.1587 |
| 1IPP | C88  | 588 | 6.613 | 5.674 | 6.181 | 0.2742  | 0.2809  | -0.1378 |
| 1IPP | C89  | 589 | 6.439 | 5.721 | 6.416 | 0.2906  | 0.2552  | -0.1275 |
| 1IPP | C90  | 590 | 6.544 | 5.903 | 6.626 | 0.2895  | 0.2781  | -0.1351 |
| 1IPP | C91  | 591 | 6.468 | 6.182 | 6.562 | 0.2264  | 0.2656  | -0.1283 |
| 1IPP | C92  | 592 | 6.552 | 6.279 | 6.295 | 0.1923  | 0.2773  | -0.1568 |
| 1IPP | C93  | 593 | 6.761 | 6.473 | 6.212 | 0.1539  | 0.3071  | -0.1788 |
| 1IPP | C94  | 594 | 6.692 | 6.763 | 6.215 | 0.1173  | 0.2957  | -0.1645 |
| 1IPP | C95  | 595 | 6.586 | 6.928 | 5.991 | 0.0512  | 0.2722  | -0.1632 |
| 1IPP | C96  | 596 | 6.310 | 7.029 | 5.953 | 0.0450  | 0.2239  | -0.1426 |
| 1IPP | C97  | 597 | 6.071 | 6.903 | 5.825 | 0.0495  | 0.1846  | -0.1179 |
| 1IPP | C98  | 598 | 6.008 | 6.884 | 5.534 | 0.0152  | 0.1666  | -0.0991 |
| 1IPP | C99  | 599 | 5.863 | 7.082 | 5.366 | -0.0286 | 0.1419  | -0.1000 |
| 1IPP | C100 | 600 | 5.565 | 7.070 | 5.375 | -0.0232 | 0.1067  | -0.0691 |
| 1IPP | C1   | 601 | 2.929 | 5.303 | 7.451 | 0.4556  | -0.2705 | 0.2421  |
| 1IPP | C2   | 602 | 3.018 | 5.588 | 7.451 | 0.4089  | -0.2559 | 0.2260  |
| 1IPP | C3   | 603 | 2.837 | 5.799 | 7.344 | 0.3694  | -0.2841 | 0.2360  |
| 1IPP | C4   | 604 | 2.823 | 5.881 | 7.058 | 0.3299  | -0.2999 | 0.2370  |
| 1IPP | C5   | 605 | 2.966 | 6.109 | 6.930 | 0.2874  | -0.2851 | 0.2169  |
| 1IPP | C6   | 606 | 2.837 | 6.374 | 6.961 | 0.2467  | -0.2877 | 0.2248  |
| 1IPP | C7   | 607 | 2.566 | 6.417 | 6.845 | 0.2114  | -0.3420 | 0.2484  |
| 1IPP | C8   | 608 | 2.529 | 6.516 | 6.567 | 0.1857  | -0.3463 | 0.2539  |
| 1IPP | C9   | 609 | 2.591 | 6.806 | 6.539 | 0.1396  | -0.3372 | 0.2381  |
| 1IPP | C10  | 610 | 2.858 | 6.869 | 6.427 | 0.1095  | -0.2983 | 0.2194  |
| 1IPP | C11  | 611 | 3.101 | 6.792 | 6.576 | 0.1406  | -0.2665 | 0.1886  |
| 1IPP | C12  | 612 | 3.201 | 7.012 | 6.750 | 0.1249  | -0.2345 | 0.1814  |
| 1IPP | C13  | 613 | 3.335 | 7.224 | 6.590 | 0.0753  | -0.2198 | 0.1570  |
| 1IPP | C14  | 614 | 3.604 | 7.124 | 6.514 | 0.0784  | -0.1902 | 0.1369  |
| 1IPP | C15  | 615 | 3.556 | 6.856 | 6.396 | 0.1140  | -0.1900 | 0.1281  |
| 1IPP | C16  | 616 | 3.530 | 6.669 | 6.624 | 0.1564  | -0.1998 | 0.1491  |
| 1IPP | C17  | 617 | 3.803 | 6.606 | 6.718 | 0.1901  | -0.1474 | 0.1314  |
| 1IPP | C18  | 618 | 3.913 | 6.515 | 6.458 | 0.1785  | -0.1408 | 0.1086  |
| 1IPP | C19  | 619 | 3.694 | 6.354 | 6.343 | 0.1838  | -0.1809 | 0.1376  |
| 1IPP | C20  | 620 | 3.609 | 6.123 | 6.508 | 0.2406  | -0.1833 | 0.1518  |
| 1IPP | C21  | 621 | 3.358 | 6.172 | 6.659 | 0.2371  | -0.2171 | 0.1695  |
| 1IPP | C22  | 622 | 3.374 | 6.335 | 6.907 | 0.2406  | -0.2041 | 0.1674  |
| 1IPP | C23  | 623 | 3.465 | 6.197 | 7.155 | 0.3021  | -0.1861 | 0.1657  |
| 1IPP | C24  | 624 | 3.257 | 6.013 | 7.262 | 0.3281  | -0.2339 | 0.1925  |
| 1IPP | C25  | 625 | 3.282 | 5.756 | 7.117 | 0.3537  | -0.2247 | 0.1813  |
| 1IPP | C26  | 626 | 3.263 | 5.757 | 6.822 | 0.3209  | -0.2339 | 0.2055  |
| 1IPP | C27  | 627 | 3.014 | 5.761 | 6.663 | 0.3131  | -0.2698 | 0.2264  |
| 1IPP | C28  | 628 | 2.923 | 5.537 | 6.492 | 0.3302  | -0.2920 | 0.2403  |
| 1IPP | C29  | 629 | 3.009 | 5.508 | 6.209 | 0.3033  | -0.2903 | 0.2196  |
| 1IPP | C30  | 630 | 2.888 | 5.678 | 5.999 | 0.2621  | -0.3087 | 0.2401  |
| 1IPP | C31  | 631 | 2.650 | 5.600 | 5.838 | 0.2478  | -0.3421 | 0.2580  |
| 1IPP | C32  | 632 | 2.672 | 5.359 | 5.665 | 0.2719  | -0.3449 | 0.2594  |
| 1IPP | C33  | 633 | 2.809 | 5.329 | 5.402 | 0.2362  | -0.3343 | 0.2513  |
| 1IPP | C34  | 634 | 2.685 | 5.358 | 5.132 | 0.2101  | -0.3636 | 0.2715  |
| 1IPP | C35  | 635 | 2.841 | 5.532 | 4.947 | 0.1697  | -0.3257 | 0.2343  |
| 1IPP | C36  | 636 | 3.113 | 5.414 | 4.956 | 0.1996  | -0.2972 | 0.2149  |
| 1IPP | C37  | 637 | 3.228 | 5.491 | 5.217 | 0.2071  | -0.2729 | 0.2073  |
| 1IPP | C38  | 638 | 3.321 | 5.772 | 5.223 | 0.1635  | -0.2513 | 0.1884  |
| 1IPP | C39  | 639 | 3.606 | 5.851 | 5.217 | 0.1407  | -0.2152 | 0.1614  |
| 1IPP | C40  | 640 | 3.685 | 5.838 | 5.504 | 0.1858  | -0.1959 | 0.1471  |
| 1IPP | C41  | 641 | 3.481 | 5.954 | 5.681 | 0.1784  | -0.2230 | 0.1717  |
| 1IPP | C42  | 642 | 3.338 | 6.136 | 5.498 | 0.1199  | -0.2458 | 0.1791  |
| 1IPP | C43  | 643 | 3.394 | 6.426 | 5.501 | 0.0883  | -0.2357 | 0.1751  |
| 1IPP | C44  | 644 | 3.249 | 6.573 | 5.711 | 0.0916  | -0.2647 | 0.1766  |
| 1IPP | C45  | 645 | 2.989 | 6.700 | 5.653 | 0.0656  | -0.3019 | 0.2073  |
| 1IPP | C46  | 646 | 2.992 | 6.975 | 5.544 | -0.0026 | -0.2987 | 0.1926  |
| 1IPP | C47  | 647 | 2.874 | 7.155 | 5.748 | 0.0011  | -0.3209 | 0.1990  |
| 1IPP | C48  | 648 | 3.004 | 7.368 | 5.911 | -0.0182 | -0.2794 | 0.1813  |
| 1IPP | C49  | 649 | 3.102 | 7.285 | 6.178 | 0.0202  | -0.2792 | 0.1808  |
| 1IPP | C50  | 650 | 3.375 | 7.184 | 6.125 | 0.0262  | -0.2382 | 0.1358  |
| 1IPP | C51  | 651 | 3.292 | 6.969 | 5.939 | 0.0441  | -0.2375 | 0.1779  |
| 1IPP | C52  | 652 | 3.148 | 6.760 | 6.093 | 0.0965  | -0.2615 | 0.1745  |

|      |      |     |       |       |       |         |         |         |
|------|------|-----|-------|-------|-------|---------|---------|---------|
| 1IPP | C53  | 653 | 3.303 | 6.529 | 6.197 | 0.1434  | -0.2346 | 0.1730  |
| 1IPP | C54  | 654 | 3.372 | 6.292 | 6.031 | 0.1639  | -0.2254 | 0.1722  |
| 1IPP | C55  | 655 | 3.196 | 6.052 | 6.025 | 0.1932  | -0.2559 | 0.1937  |
| 1IPP | C56  | 656 | 3.184 | 5.921 | 6.290 | 0.2550  | -0.2609 | 0.2022  |
| 1IPP | C57  | 657 | 3.399 | 5.745 | 6.395 | 0.2833  | -0.2304 | 0.1807  |
| 1IPP | C58  | 658 | 3.410 | 5.448 | 6.401 | 0.3329  | -0.2059 | 0.1971  |
| 1IPP | C59  | 659 | 3.319 | 5.288 | 6.633 | 0.3896  | -0.2215 | 0.2016  |
| 1IPP | C60  | 660 | 3.049 | 5.171 | 6.686 | 0.3930  | -0.2784 | 0.2293  |
| 1IPP | C61  | 661 | 2.953 | 4.892 | 6.687 | 0.4472  | -0.2666 | 0.2505  |
| 1IPP | C62  | 662 | 2.813 | 4.797 | 6.445 | 0.4290  | -0.3094 | 0.2666  |
| 1IPP | C63  | 663 | 2.519 | 4.810 | 6.410 | 0.4323  | -0.3503 | 0.2863  |
| 1IPP | C64  | 664 | 2.379 | 4.558 | 6.340 | 0.4606  | -0.3814 | 0.3105  |
| 1IPP | C65  | 665 | 2.443 | 4.505 | 6.055 | 0.4518  | -0.3755 | 0.3131  |
| 1IPP | C66  | 666 | 2.300 | 4.642 | 5.831 | 0.3978  | -0.4052 | 0.3125  |
| 1IPP | C67  | 667 | 2.388 | 4.908 | 5.727 | 0.3517  | -0.3881 | 0.3069  |
| 1IPP | C68  | 668 | 2.607 | 4.940 | 5.529 | 0.3160  | -0.3678 | 0.2834  |
| 1IPP | C69  | 669 | 2.892 | 4.920 | 5.608 | 0.3354  | -0.3129 | 0.2514  |
| 1IPP | C70  | 670 | 3.058 | 5.112 | 5.762 | 0.3266  | -0.2898 | 0.2325  |
| 1IPP | C71  | 671 | 3.228 | 5.325 | 5.641 | 0.2741  | -0.2534 | 0.2021  |
| 1IPP | C72  | 672 | 3.201 | 5.619 | 5.669 | 0.2214  | -0.2728 | 0.2015  |
| 1IPP | C73  | 673 | 2.964 | 5.773 | 5.576 | 0.1929  | -0.3044 | 0.2288  |
| 1IPP | C74  | 674 | 2.849 | 5.781 | 5.304 | 0.1710  | -0.3316 | 0.2372  |
| 1IPP | C75  | 675 | 2.931 | 5.977 | 5.099 | 0.1188  | -0.3274 | 0.2267  |
| 1IPP | C76  | 676 | 2.794 | 6.230 | 5.167 | 0.0802  | -0.3410 | 0.2369  |
| 1IPP | C77  | 677 | 2.925 | 6.346 | 5.407 | 0.0909  | -0.3159 | 0.2130  |
| 1IPP | C78  | 678 | 2.957 | 6.216 | 5.673 | 0.1405  | -0.2992 | 0.2095  |
| 1IPP | C79  | 679 | 2.774 | 6.116 | 5.885 | 0.1721  | -0.3293 | 0.2451  |
| 1IPP | C80  | 680 | 2.654 | 6.302 | 6.081 | 0.1551  | -0.3352 | 0.2496  |
| 1IPP | C81  | 681 | 2.842 | 6.461 | 6.244 | 0.1504  | -0.3068 | 0.2245  |
| 1IPP | C82  | 682 | 2.971 | 6.290 | 6.447 | 0.2030  | -0.2870 | 0.2173  |
| 1IPP | C83  | 683 | 2.747 | 6.117 | 6.536 | 0.2417  | -0.3144 | 0.2485  |
| 1IPP | C84  | 684 | 2.667 | 5.883 | 6.371 | 0.2532  | -0.3414 | 0.2524  |
| 1IPP | C85  | 685 | 2.470 | 5.872 | 6.150 | 0.2405  | -0.3713 | 0.2728  |
| 1IPP | C86  | 686 | 2.180 | 5.929 | 6.175 | 0.2327  | -0.4131 | 0.3050  |
| 1IPP | C87  | 687 | 2.019 | 5.778 | 6.371 | 0.2803  | -0.4308 | 0.3296  |
| 1IPP | C88  | 688 | 2.024 | 5.989 | 6.579 | 0.2602  | -0.4337 | 0.3078  |
| 1IPP | C89  | 689 | 2.301 | 6.075 | 6.645 | 0.2547  | -0.3917 | 0.2850  |
| 1IPP | C90  | 690 | 2.420 | 5.895 | 6.850 | 0.3060  | -0.3530 | 0.2762  |
| 1IPP | C91  | 691 | 2.562 | 5.658 | 6.740 | 0.3341  | -0.3379 | 0.2717  |
| 1IPP | C92  | 692 | 2.390 | 5.546 | 6.526 | 0.3217  | -0.3757 | 0.2903  |
| 1IPP | C93  | 693 | 2.157 | 5.378 | 6.603 | 0.3636  | -0.4042 | 0.3195  |
| 1IPP | C94  | 694 | 2.167 | 5.083 | 6.571 | 0.4056  | -0.4086 | 0.3195  |
| 1IPP | C95  | 695 | 2.069 | 5.010 | 6.300 | 0.3922  | -0.4340 | 0.3347  |
| 1IPP | C96  | 696 | 2.283 | 5.091 | 6.112 | 0.3482  | -0.3949 | 0.3142  |
| 1IPP | C97  | 697 | 2.341 | 5.381 | 6.081 | 0.3032  | -0.3917 | 0.2912  |
| 1IPP | C98  | 698 | 2.192 | 5.565 | 5.902 | 0.2670  | -0.4156 | 0.3067  |
| 1IPP | C99  | 699 | 2.213 | 5.556 | 5.606 | 0.2348  | -0.4232 | 0.3159  |
| 1IPP | C100 | 700 | 2.424 | 5.648 | 5.418 | 0.1989  | -0.3885 | 0.2859  |
| 1IPP | C1   | 701 | 6.755 | 6.722 | 4.360 | -0.0683 | 0.2584  | -0.1801 |
| 1IPP | C2   | 702 | 7.017 | 6.762 | 4.495 | -0.0665 | 0.3011  | -0.2032 |
| 1IPP | C3   | 703 | 7.125 | 6.615 | 4.730 | -0.0213 | 0.3258  | -0.2124 |
| 1IPP | C4   | 704 | 7.061 | 6.752 | 4.985 | -0.0151 | 0.3270  | -0.2098 |
| 1IPP | C5   | 705 | 7.239 | 6.989 | 4.988 | -0.0457 | 0.3500  | -0.2378 |
| 1IPP | C6   | 706 | 7.531 | 6.960 | 5.027 | -0.0478 | 0.3970  | -0.2750 |
| 1IPP | C7   | 707 | 7.650 | 6.897 | 5.292 | -0.0043 | 0.4136  | -0.2743 |
| 1IPP | C8   | 708 | 7.625 | 7.098 | 5.508 | -0.0187 | 0.4182  | -0.2647 |
| 1IPP | C9   | 709 | 7.379 | 6.975 | 5.615 | 0.0177  | 0.3852  | -0.2576 |
| 1IPP | C10  | 710 | 7.154 | 6.944 | 5.425 | 0.0035  | 0.3378  | -0.2154 |
| 1IPP | C11  | 711 | 6.994 | 7.189 | 5.455 | -0.0326 | 0.3365  | -0.2147 |
| 1IPP | C12  | 712 | 6.884 | 7.164 | 5.730 | -0.0043 | 0.3161  | -0.1958 |
| 1IPP | C13  | 713 | 7.016 | 6.938 | 5.870 | 0.0480  | 0.3355  | -0.2120 |
| 1IPP | C14  | 714 | 7.016 | 6.658 | 5.770 | 0.0833  | 0.3315  | -0.1954 |
| 1IPP | C15  | 715 | 7.249 | 6.523 | 5.636 | 0.0944  | 0.3666  | -0.2234 |
| 1IPP | C16  | 716 | 7.302 | 6.521 | 5.343 | 0.0574  | 0.3703  | -0.2272 |
| 1IPP | C17  | 717 | 7.120 | 6.356 | 5.173 | 0.0596  | 0.3479  | -0.2091 |
| 1IPP | C18  | 718 | 7.154 | 6.067 | 5.114 | 0.1093  | 0.3305  | -0.2125 |
| 1IPP | C19  | 719 | 7.269 | 5.972 | 4.856 | 0.0980  | 0.3502  | -0.2054 |
| 1IPP | C20  | 720 | 7.137 | 5.799 | 4.653 | 0.0923  | 0.3332  | -0.1938 |
| 1IPP | C21  | 721 | 7.205 | 5.510 | 4.656 | 0.1396  | 0.3398  | -0.1929 |
| 1IPP | C22  | 722 | 7.045 | 5.303 | 4.795 | 0.1979  | 0.3070  | -0.1779 |
| 1IPP | C23  | 723 | 7.162 | 5.199 | 5.047 | 0.2328  | 0.3319  | -0.1950 |
| 1IPP | C24  | 724 | 7.360 | 4.981 | 5.011 | 0.2545  | 0.3609  | -0.1949 |
| 1IPP | C25  | 725 | 7.632 | 5.096 | 5.000 | 0.2531  | 0.4045  | -0.2317 |

|      |     |     |       |       |       |         |        |         |
|------|-----|-----|-------|-------|-------|---------|--------|---------|
| 1IPP | C26 | 726 | 7.617 | 5.373 | 4.891 | 0.1985  | 0.4079 | -0.2401 |
| 1IPP | C27 | 727 | 7.669 | 5.473 | 4.616 | 0.1528  | 0.4080 | -0.2389 |
| 1IPP | C28 | 728 | 7.943 | 5.568 | 4.550 | 0.1251  | 0.4500 | -0.2751 |
| 1IPP | C29 | 729 | 8.046 | 5.826 | 4.658 | 0.0863  | 0.4655 | -0.2892 |
| 1IPP | C30 | 730 | 8.022 | 6.093 | 4.532 | 0.0537  | 0.4558 | -0.2895 |
| 1IPP | C31 | 731 | 8.233 | 6.247 | 4.392 | 0.0080  | 0.4908 | -0.3272 |
| 1IPP | C32 | 732 | 8.334 | 6.479 | 4.549 | -0.0222 | 0.5144 | -0.3336 |
| 1IPP | C33 | 733 | 8.594 | 6.503 | 4.694 | -0.0085 | 0.5564 | -0.3573 |
| 1IPP | C34 | 734 | 8.642 | 6.434 | 4.980 | 0.0342  | 0.5700 | -0.3584 |
| 1IPP | C35 | 735 | 8.814 | 6.200 | 5.048 | 0.0832  | 0.5984 | -0.3801 |
| 1IPP | C36 | 736 | 8.707 | 5.923 | 5.077 | 0.1177  | 0.5831 | -0.3512 |
| 1IPP | C37 | 737 | 8.578 | 5.906 | 5.343 | 0.1511  | 0.5576 | -0.3458 |
| 1IPP | C38 | 738 | 8.305 | 6.018 | 5.376 | 0.1484  | 0.5129 | -0.3190 |
| 1IPP | C39 | 739 | 8.272 | 6.313 | 5.384 | 0.0967  | 0.5233 | -0.3178 |
| 1IPP | C40 | 740 | 8.325 | 6.479 | 5.625 | 0.0989  | 0.5291 | -0.3356 |
| 1IPP | C41 | 741 | 8.129 | 6.523 | 5.845 | 0.1119  | 0.5005 | -0.3113 |
| 1IPP | C42 | 742 | 7.950 | 6.759 | 5.815 | 0.0695  | 0.4838 | -0.2937 |
| 1IPP | C43 | 743 | 7.677 | 6.674 | 5.737 | 0.0817  | 0.4271 | -0.2781 |
| 1IPP | C44 | 744 | 7.723 | 6.446 | 5.555 | 0.0917  | 0.4460 | -0.2677 |
| 1IPP | C45 | 745 | 7.869 | 6.484 | 5.300 | 0.0550  | 0.4581 | -0.2882 |
| 1IPP | C46 | 746 | 7.711 | 6.531 | 5.055 | 0.0199  | 0.4285 | -0.2753 |
| 1IPP | C47 | 747 | 7.569 | 6.281 | 4.985 | 0.0517  | 0.4061 | -0.2462 |
| 1IPP | C48 | 748 | 7.705 | 6.046 | 4.862 | 0.0843  | 0.4172 | -0.2588 |
| 1IPP | C49 | 749 | 7.772 | 5.794 | 5.007 | 0.1422  | 0.4319 | -0.2538 |
| 1IPP | C50 | 750 | 8.039 | 5.763 | 5.136 | 0.1615  | 0.4757 | -0.2986 |
| 1IPP | C51 | 751 | 8.296 | 5.700 | 5.002 | 0.1525  | 0.5058 | -0.3087 |
| 1IPP | C52 | 752 | 8.406 | 5.433 | 4.934 | 0.1810  | 0.5345 | -0.3191 |
| 1IPP | C53 | 753 | 8.302 | 5.308 | 4.687 | 0.1831  | 0.5071 | -0.2813 |
| 1IPP | C54 | 754 | 8.047 | 5.181 | 4.766 | 0.2146  | 0.4774 | -0.2708 |
| 1IPP | C55 | 755 | 8.096 | 4.959 | 4.956 | 0.2688  | 0.4766 | -0.2776 |
| 1IPP | C56 | 756 | 8.152 | 4.697 | 4.830 | 0.2868  | 0.4884 | -0.2746 |
| 1IPP | C57 | 757 | 7.889 | 4.593 | 4.740 | 0.2982  | 0.4338 | -0.2413 |
| 1IPP | C58 | 758 | 7.784 | 4.736 | 4.502 | 0.2576  | 0.4249 | -0.2337 |
| 1IPP | C59 | 759 | 7.677 | 5.011 | 4.544 | 0.2036  | 0.4154 | -0.2372 |
| 1IPP | C60 | 760 | 7.393 | 5.092 | 4.583 | 0.2089  | 0.3637 | -0.1974 |
| 1IPP | C61 | 761 | 7.241 | 5.161 | 4.338 | 0.1610  | 0.3337 | -0.1959 |
| 1IPP | C62 | 762 | 7.373 | 5.382 | 4.189 | 0.1255  | 0.3522 | -0.2142 |
| 1IPP | C63 | 763 | 7.335 | 5.670 | 4.254 | 0.0774  | 0.3456 | -0.2119 |
| 1IPP | C64 | 764 | 7.519 | 5.839 | 4.415 | 0.0757  | 0.3875 | -0.2332 |
| 1IPP | C65 | 765 | 7.672 | 6.046 | 4.270 | 0.0133  | 0.3972 | -0.2504 |
| 1IPP | C66 | 766 | 7.880 | 5.948 | 4.082 | 0.0267  | 0.4271 | -0.2831 |
| 1IPP | C67 | 767 | 8.095 | 5.762 | 4.172 | 0.0574  | 0.4603 | -0.2900 |
| 1IPP | C68 | 768 | 8.371 | 5.821 | 4.266 | 0.0563  | 0.5079 | -0.3198 |
| 1IPP | C69 | 769 | 8.474 | 5.806 | 4.545 | 0.0887  | 0.5239 | -0.3287 |
| 1IPP | C70 | 770 | 8.493 | 6.053 | 4.709 | 0.0692  | 0.5500 | -0.3353 |
| 1IPP | C71 | 771 | 8.315 | 6.126 | 4.935 | 0.0870  | 0.5091 | -0.3225 |
| 1IPP | C72 | 772 | 8.087 | 6.313 | 4.933 | 0.0385  | 0.4840 | -0.3025 |
| 1IPP | C73 | 773 | 8.199 | 6.586 | 4.962 | 0.0101  | 0.4931 | -0.3236 |
| 1IPP | C74 | 774 | 8.295 | 6.723 | 5.210 | 0.0086  | 0.5190 | -0.3305 |
| 1IPP | C75 | 775 | 8.100 | 6.869 | 5.381 | 0.0059  | 0.4990 | -0.3177 |
| 1IPP | C76 | 776 | 8.031 | 7.153 | 5.324 | -0.0346 | 0.4814 | -0.3082 |
| 1IPP | C77 | 777 | 8.081 | 7.390 | 5.496 | -0.0654 | 0.4914 | -0.3361 |
| 1IPP | C78 | 778 | 7.868 | 7.440 | 5.699 | -0.0436 | 0.4652 | -0.3025 |
| 1IPP | C79 | 779 | 7.633 | 7.598 | 5.611 | -0.0830 | 0.4218 | -0.2929 |
| 1IPP | C80 | 780 | 7.379 | 7.485 | 5.503 | -0.0775 | 0.3815 | -0.2623 |
| 1IPP | C81 | 781 | 7.347 | 7.349 | 5.241 | -0.0809 | 0.3725 | -0.2421 |
| 1IPP | C82 | 782 | 7.312 | 7.474 | 4.974 | -0.1134 | 0.3554 | -0.2527 |
| 1IPP | C83 | 783 | 7.047 | 7.578 | 4.891 | -0.1658 | 0.3211 | -0.2289 |
| 1IPP | C84 | 784 | 6.818 | 7.425 | 5.001 | -0.1204 | 0.2926 | -0.2065 |
| 1IPP | C85 | 785 | 6.821 | 7.134 | 4.944 | -0.0784 | 0.2771 | -0.1918 |
| 1IPP | C86 | 786 | 6.696 | 6.984 | 4.722 | -0.0762 | 0.2617 | -0.1781 |
| 1IPP | C87 | 787 | 6.474 | 6.785 | 4.741 | -0.0449 | 0.2301 | -0.1564 |
| 1IPP | C88 | 788 | 6.543 | 6.505 | 4.811 | 0.0132  | 0.2363 | -0.1513 |
| 1IPP | C89 | 789 | 6.754 | 6.376 | 4.650 | 0.0083  | 0.2790 | -0.1674 |
| 1IPP | C90 | 790 | 6.716 | 6.263 | 4.377 | -0.0035 | 0.2503 | -0.1594 |
| 1IPP | C91 | 791 | 6.726 | 5.968 | 4.395 | 0.0482  | 0.2526 | -0.1587 |
| 1IPP | C92 | 792 | 6.488 | 5.797 | 4.350 | 0.0714  | 0.2146 | -0.1328 |
| 1IPP | C93 | 793 | 6.432 | 5.656 | 4.097 | 0.0699  | 0.2015 | -0.1206 |
| 1IPP | C94 | 794 | 6.350 | 5.803 | 3.855 | 0.0147  | 0.1854 | -0.1198 |
| 1IPP | C95 | 795 | 6.604 | 5.898 | 3.737 | -0.0073 | 0.2253 | -0.1416 |
| 1IPP | C96 | 796 | 6.725 | 6.110 | 3.906 | -0.0157 | 0.2511 | -0.1615 |
| 1IPP | C97 | 797 | 7.011 | 6.141 | 3.985 | -0.0203 | 0.2833 | -0.1917 |
| 1IPP | C98 | 798 | 7.132 | 6.053 | 4.241 | 0.0134  | 0.3200 | -0.1950 |

|      |      |     |       |       |       |         |         |         |
|------|------|-----|-------|-------|-------|---------|---------|---------|
| 1IPP | C99  | 799 | 7.159 | 6.220 | 4.484 | 0.0160  | 0.3250  | -0.2056 |
| 1IPP | C100 | 800 | 7.436 | 6.294 | 4.557 | 0.0119  | 0.3719  | -0.2349 |
| 1IPP | C1   | 801 | 3.391 | 8.053 | 4.977 | -0.2214 | -0.2421 | 0.1329  |
| 1IPP | C2   | 802 | 3.442 | 7.763 | 5.025 | -0.1696 | -0.2501 | 0.1277  |
| 1IPP | C3   | 803 | 3.453 | 7.645 | 5.298 | -0.1174 | -0.2354 | 0.1407  |
| 1IPP | C4   | 804 | 3.712 | 7.639 | 5.443 | -0.1124 | -0.1964 | 0.1026  |
| 1IPP | C5   | 805 | 3.902 | 7.413 | 5.408 | -0.0770 | -0.1689 | 0.0899  |
| 1IPP | C6   | 806 | 3.910 | 7.171 | 5.583 | -0.0184 | -0.1526 | 0.1027  |
| 1IPP | C7   | 807 | 4.115 | 7.201 | 5.794 | 0.0020  | -0.1161 | 0.0737  |
| 1IPP | C8   | 808 | 4.376 | 7.197 | 5.653 | -0.0230 | -0.0950 | 0.0538  |
| 1IPP | C9   | 809 | 4.424 | 7.481 | 5.580 | -0.0721 | -0.0609 | 0.0372  |
| 1IPP | C10  | 810 | 4.329 | 7.609 | 5.331 | -0.1156 | -0.0939 | 0.0500  |
| 1IPP | C11  | 811 | 4.527 | 7.677 | 5.120 | -0.1430 | -0.0673 | 0.0170  |
| 1IPP | C12  | 812 | 4.659 | 7.941 | 5.106 | -0.1903 | -0.0543 | 0.0043  |
| 1IPP | C13  | 813 | 4.441 | 8.115 | 5.007 | -0.2281 | -0.0951 | 0.0246  |
| 1IPP | C14  | 814 | 4.200 | 8.020 | 5.153 | -0.1979 | -0.1203 | 0.0443  |
| 1IPP | C15  | 815 | 4.010 | 7.826 | 5.031 | -0.1711 | -0.1467 | 0.0770  |
| 1IPP | C16  | 816 | 4.047 | 7.536 | 4.975 | -0.1364 | -0.1532 | 0.0687  |
| 1IPP | C17  | 817 | 4.208 | 7.561 | 4.727 | -0.1756 | -0.1242 | 0.0601  |
| 1IPP | C18  | 818 | 4.113 | 7.751 | 4.523 | -0.2151 | -0.1510 | 0.0715  |
| 1IPP | C19  | 819 | 4.239 | 8.018 | 4.551 | -0.2667 | -0.1231 | 0.0482  |
| 1IPP | C20  | 820 | 4.084 | 8.208 | 4.716 | -0.2629 | -0.1568 | 0.0565  |
| 1IPP | C21  | 821 | 3.879 | 8.400 | 4.618 | -0.3084 | -0.1897 | 0.0703  |
| 1IPP | C22  | 822 | 3.595 | 8.380 | 4.697 | -0.3046 | -0.2312 | 0.1040  |
| 1IPP | C23  | 823 | 3.648 | 8.472 | 4.971 | -0.2939 | -0.2034 | 0.0922  |
| 1IPP | C24  | 824 | 3.808 | 8.242 | 5.067 | -0.2362 | -0.1867 | 0.0898  |
| 1IPP | C25  | 825 | 3.705 | 8.051 | 5.268 | -0.1878 | -0.2015 | 0.1014  |
| 1IPP | C26  | 826 | 3.838 | 8.081 | 5.528 | -0.1677 | -0.1657 | 0.0854  |
| 1IPP | C27  | 827 | 4.080 | 7.922 | 5.586 | -0.1365 | -0.1319 | 0.0555  |
| 1IPP | C28  | 828 | 4.065 | 7.674 | 5.747 | -0.0826 | -0.1332 | 0.0672  |
| 1IPP | C29  | 829 | 4.048 | 7.765 | 6.028 | -0.0747 | -0.1188 | 0.0716  |
| 1IPP | C30  | 830 | 3.776 | 7.863 | 6.093 | -0.0788 | -0.1717 | 0.0927  |
| 1IPP | C31  | 831 | 3.692 | 8.099 | 5.936 | -0.1272 | -0.1781 | 0.0995  |
| 1IPP | C32  | 832 | 3.835 | 8.359 | 5.926 | -0.1688 | -0.1630 | 0.0820  |
| 1IPP | C33  | 833 | 4.071 | 8.390 | 5.748 | -0.1923 | -0.1235 | 0.0547  |
| 1IPP | C34  | 834 | 4.346 | 8.375 | 5.857 | -0.1833 | -0.0909 | 0.0302  |
| 1IPP | C35  | 835 | 4.405 | 8.650 | 5.954 | -0.2123 | -0.0687 | 0.0158  |
| 1IPP | C36  | 836 | 4.528 | 8.848 | 5.768 | -0.2663 | -0.0641 | 0.0008  |
| 1IPP | C37  | 837 | 4.366 | 9.014 | 5.581 | -0.3067 | -0.0826 | 0.0143  |
| 1IPP | C38  | 838 | 4.304 | 8.880 | 5.324 | -0.3163 | -0.0966 | 0.0183  |
| 1IPP | C39  | 839 | 4.520 | 8.818 | 5.130 | -0.3180 | -0.0678 | -0.0137 |
| 1IPP | C40  | 840 | 4.595 | 9.007 | 4.915 | -0.3743 | -0.0616 | -0.0134 |
| 1IPP | C41  | 841 | 4.455 | 8.964 | 4.657 | -0.3910 | -0.0912 | 0.0003  |
| 1IPP | C42  | 842 | 4.594 | 8.736 | 4.529 | -0.3643 | -0.0699 | -0.0082 |
| 1IPP | C43  | 843 | 4.472 | 8.477 | 4.611 | -0.3255 | -0.0900 | 0.0120  |
| 1IPP | C44  | 844 | 4.283 | 8.453 | 4.385 | -0.3355 | -0.1250 | 0.0387  |
| 1IPP | C45  | 845 | 4.104 | 8.691 | 4.371 | -0.3857 | -0.1590 | 0.0510  |
| 1IPP | C46  | 846 | 4.112 | 8.906 | 4.166 | -0.4298 | -0.1442 | 0.0367  |
| 1IPP | C47  | 847 | 4.268 | 9.132 | 4.274 | -0.4670 | -0.1272 | 0.0156  |
| 1IPP | C48  | 848 | 4.045 | 9.265 | 4.415 | -0.4582 | -0.1676 | 0.0242  |
| 1IPP | C49  | 849 | 3.967 | 9.081 | 4.634 | -0.4134 | -0.1560 | 0.0484  |
| 1IPP | C50  | 850 | 3.767 | 8.861 | 4.606 | -0.3892 | -0.2039 | 0.0734  |
| 1IPP | C51  | 851 | 3.490 | 8.935 | 4.679 | -0.3808 | -0.2488 | 0.1002  |
| 1IPP | C52  | 852 | 3.437 | 9.022 | 4.958 | -0.3753 | -0.2414 | 0.1068  |
| 1IPP | C53  | 853 | 3.413 | 8.805 | 5.158 | -0.3245 | -0.2471 | 0.1097  |
| 1IPP | C54  | 854 | 3.167 | 8.642 | 5.116 | -0.2895 | -0.2875 | 0.1394  |
| 1IPP | C55  | 855 | 3.185 | 8.443 | 4.896 | -0.2861 | -0.2819 | 0.1464  |
| 1IPP | C56  | 856 | 3.127 | 8.504 | 4.611 | -0.3252 | -0.3045 | 0.1467  |
| 1IPP | C57  | 857 | 2.857 | 8.435 | 4.504 | -0.3200 | -0.3451 | 0.1695  |
| 1IPP | C58  | 858 | 2.810 | 8.147 | 4.447 | -0.2924 | -0.3478 | 0.1832  |
| 1IPP | C59  | 859 | 2.656 | 7.992 | 4.649 | -0.2419 | -0.3770 | 0.2140  |
| 1IPP | C60  | 860 | 2.686 | 8.086 | 4.930 | -0.2391 | -0.3690 | 0.1926  |
| 1IPP | C61  | 861 | 2.956 | 8.073 | 5.053 | -0.2089 | -0.3158 | 0.1749  |
| 1IPP | C62  | 862 | 3.054 | 7.852 | 5.225 | -0.1693 | -0.3021 | 0.1744  |
| 1IPP | C63  | 863 | 3.102 | 7.887 | 5.516 | -0.1347 | -0.2748 | 0.1596  |
| 1IPP | C64  | 864 | 3.371 | 7.977 | 5.605 | -0.1412 | -0.2488 | 0.1277  |
| 1IPP | C65  | 865 | 3.399 | 8.272 | 5.636 | -0.1901 | -0.2262 | 0.1241  |
| 1IPP | C66  | 866 | 3.503 | 8.442 | 5.415 | -0.2311 | -0.2225 | 0.1124  |
| 1IPP | C67  | 867 | 3.789 | 8.522 | 5.409 | -0.2494 | -0.1770 | 0.0715  |
| 1IPP | C68  | 868 | 3.901 | 8.778 | 5.510 | -0.2866 | -0.1682 | 0.0587  |
| 1IPP | C69  | 869 | 3.856 | 8.988 | 5.303 | -0.3323 | -0.1702 | 0.0593  |
| 1IPP | C70  | 870 | 3.874 | 8.859 | 5.036 | -0.3388 | -0.1713 | 0.0658  |
| 1IPP | C71  | 871 | 4.128 | 8.759 | 4.919 | -0.3302 | -0.1314 | 0.0413  |



|      |      |     |       |       |       |         |         |         |
|------|------|-----|-------|-------|-------|---------|---------|---------|
| 1IPP | C72  | 872 | 4.192 | 8.493 | 5.032 | -0.2740 | -0.1290 | 0.0394  |
| 1IPP | C73  | 873 | 4.246 | 8.445 | 5.321 | -0.2372 | -0.1057 | 0.0283  |
| 1IPP | C74  | 874 | 4.510 | 8.486 | 5.454 | -0.2479 | -0.0718 | 0.0034  |
| 1IPP | C75  | 875 | 4.672 | 8.238 | 5.446 | -0.1930 | -0.0449 | 0.0015  |
| 1IPP | C76  | 876 | 4.506 | 8.006 | 5.528 | -0.1528 | -0.0714 | 0.0199  |
| 1IPP | C77  | 877 | 4.476 | 7.934 | 5.813 | -0.1176 | -0.0595 | 0.0256  |
| 1IPP | C78  | 878 | 4.612 | 7.701 | 5.938 | -0.0716 | -0.0467 | 0.0100  |
| 1IPP | C79  | 879 | 4.421 | 7.490 | 6.027 | -0.0247 | -0.0645 | 0.0391  |
| 1IPP | C80  | 880 | 4.339 | 7.535 | 6.308 | -0.0012 | -0.0774 | 0.0437  |
| 1IPP | C81  | 881 | 4.330 | 7.337 | 6.531 | 0.0510  | -0.0699 | 0.0551  |
| 1IPP | C82  | 882 | 4.064 | 7.210 | 6.565 | 0.0661  | -0.1117 | 0.0834  |
| 1IPP | C83  | 883 | 4.023 | 6.944 | 6.442 | 0.1048  | -0.1212 | 0.0834  |
| 1IPP | C84  | 884 | 4.018 | 6.931 | 6.147 | 0.0693  | -0.1265 | 0.1016  |
| 1IPP | C85  | 885 | 3.759 | 6.948 | 6.004 | 0.0523  | -0.1776 | 0.1164  |
| 1IPP | C86  | 886 | 3.658 | 6.697 | 5.887 | 0.0916  | -0.1835 | 0.1379  |
| 1IPP | C87  | 887 | 3.700 | 6.747 | 5.597 | 0.0391  | -0.1927 | 0.1330  |
| 1IPP | C88  | 888 | 3.467 | 6.907 | 5.504 | 0.0150  | -0.2327 | 0.1533  |
| 1IPP | C89  | 889 | 3.467 | 7.204 | 5.488 | -0.0351 | -0.2297 | 0.1380  |
| 1IPP | C90  | 890 | 3.442 | 7.380 | 5.727 | -0.0416 | -0.2208 | 0.1470  |
| 1IPP | C91  | 891 | 3.687 | 7.472 | 5.870 | -0.0420 | -0.1900 | 0.1168  |
| 1IPP | C92  | 892 | 3.814 | 7.374 | 6.122 | 0.0053  | -0.1605 | 0.0902  |
| 1IPP | C93  | 893 | 3.777 | 7.519 | 6.381 | 0.0069  | -0.1535 | 0.1172  |
| 1IPP | C94  | 894 | 3.977 | 7.710 | 6.496 | -0.0146 | -0.1172 | 0.0831  |
| 1IPP | C95  | 895 | 3.985 | 8.006 | 6.460 | -0.0577 | -0.1349 | 0.0678  |
| 1IPP | C96  | 896 | 4.126 | 8.154 | 6.241 | -0.1123 | -0.1104 | 0.0618  |
| 1IPP | C97  | 897 | 4.405 | 8.250 | 6.286 | -0.1081 | -0.0651 | 0.0191  |
| 1IPP | C98  | 898 | 4.634 | 8.087 | 6.194 | -0.1054 | -0.0221 | 0.0086  |
| 1IPP | C99  | 899 | 4.726 | 7.876 | 6.381 | -0.0484 | -0.0105 | 0.0019  |
| 1IPP | C100 | 900 | 4.924 | 7.989 | 6.573 | -0.0560 | 0.0214  | -0.0210 |
| 1IPP | C1   | 901 | 3.743 | 4.553 | 4.610 | 0.2914  | -0.2139 | 0.1820  |
| 1IPP | C2   | 902 | 3.565 | 4.786 | 4.551 | 0.2382  | -0.2273 | 0.1902  |
| 1IPP | C3   | 903 | 3.646 | 5.065 | 4.483 | 0.1969  | -0.2164 | 0.1673  |
| 1IPP | C4   | 904 | 3.731 | 5.257 | 4.694 | 0.1930  | -0.2060 | 0.1615  |
| 1IPP | C5   | 905 | 3.562 | 5.425 | 4.870 | 0.1787  | -0.2397 | 0.1686  |
| 1IPP | C6   | 906 | 3.516 | 5.698 | 4.772 | 0.1160  | -0.2375 | 0.1674  |
| 1IPP | C7   | 907 | 3.789 | 5.789 | 4.708 | 0.1134  | -0.1966 | 0.1444  |
| 1IPP | C8   | 908 | 3.963 | 5.937 | 4.897 | 0.1011  | -0.1702 | 0.1195  |
| 1IPP | C9   | 909 | 3.982 | 6.233 | 4.867 | 0.0587  | -0.1564 | 0.1192  |
| 1IPP | C10  | 910 | 4.194 | 6.328 | 4.682 | 0.0192  | -0.1300 | 0.0825  |
| 1IPP | C11  | 911 | 4.432 | 6.378 | 4.851 | 0.0360  | -0.0965 | 0.0661  |
| 1IPP | C12  | 912 | 4.578 | 6.121 | 4.881 | 0.0674  | -0.0600 | 0.0522  |
| 1IPP | C13  | 913 | 4.439 | 5.867 | 4.945 | 0.1253  | -0.0848 | 0.0732  |
| 1IPP | C14  | 914 | 4.376 | 5.811 | 5.230 | 0.1555  | -0.0868 | 0.0902  |
| 1IPP | C15  | 915 | 4.096 | 5.844 | 5.321 | 0.1567  | -0.1371 | 0.1156  |
| 1IPP | C16  | 916 | 3.971 | 6.113 | 5.301 | 0.1187  | -0.1583 | 0.1181  |
| 1IPP | C17  | 917 | 3.962 | 6.339 | 5.492 | 0.1039  | -0.1513 | 0.1086  |
| 1IPP | C18  | 918 | 3.765 | 6.304 | 5.710 | 0.1205  | -0.1840 | 0.1322  |
| 1IPP | C19  | 919 | 3.832 | 6.177 | 5.969 | 0.1716  | -0.1674 | 0.1305  |
| 1IPP | C20  | 920 | 3.675 | 5.958 | 6.092 | 0.2292  | -0.1885 | 0.1450  |
| 1IPP | C21  | 921 | 3.725 | 5.667 | 6.092 | 0.2561  | -0.1675 | 0.1522  |
| 1IPP | C22  | 922 | 3.627 | 5.483 | 5.883 | 0.2664  | -0.1909 | 0.1625  |
| 1IPP | C23  | 923 | 3.843 | 5.319 | 5.764 | 0.2916  | -0.1648 | 0.1498  |
| 1IPP | C24  | 924 | 3.915 | 5.460 | 5.515 | 0.2438  | -0.1535 | 0.1325  |
| 1IPP | C25  | 925 | 3.705 | 5.420 | 5.309 | 0.2178  | -0.1919 | 0.1586  |
| 1IPP | C26  | 926 | 3.863 | 5.240 | 5.138 | 0.2397  | -0.1813 | 0.1433  |
| 1IPP | C27  | 927 | 4.098 | 5.388 | 5.039 | 0.2024  | -0.1444 | 0.1307  |
| 1IPP | C28  | 928 | 4.144 | 5.504 | 4.769 | 0.1592  | -0.1327 | 0.1201  |
| 1IPP | C29  | 929 | 4.199 | 5.284 | 4.577 | 0.1730  | -0.1279 | 0.0971  |
| 1IPP | C30  | 930 | 4.430 | 5.102 | 4.630 | 0.2056  | -0.1047 | 0.0899  |
| 1IPP | C31  | 931 | 4.696 | 5.122 | 4.499 | 0.1899  | -0.0568 | 0.0648  |
| 1IPP | C32  | 932 | 4.773 | 4.948 | 4.272 | 0.1865  | -0.0537 | 0.0611  |
| 1IPP | C33  | 933 | 4.842 | 4.674 | 4.368 | 0.2542  | -0.0378 | 0.0622  |
| 1IPP | C34  | 934 | 5.061 | 4.649 | 4.568 | 0.2719  | -0.0103 | 0.0353  |
| 1IPP | C35  | 935 | 4.949 | 4.685 | 4.842 | 0.2912  | -0.0174 | 0.0491  |
| 1IPP | C36  | 936 | 4.847 | 4.960 | 4.886 | 0.2600  | -0.0224 | 0.0531  |
| 1IPP | C37  | 937 | 5.002 | 5.195 | 4.983 | 0.2296  | 0.0026  | 0.0304  |
| 1IPP | C38  | 938 | 5.040 | 5.265 | 5.269 | 0.2405  | 0.0051  | 0.0208  |
| 1IPP | C39  | 939 | 4.829 | 5.452 | 5.361 | 0.2264  | -0.0169 | 0.0510  |
| 1IPP | C40  | 940 | 4.799 | 5.686 | 5.181 | 0.1770  | -0.0290 | 0.0420  |
| 1IPP | C41  | 941 | 4.920 | 5.956 | 5.186 | 0.1324  | -0.0147 | 0.0196  |
| 1IPP | C42  | 942 | 4.813 | 6.110 | 5.415 | 0.1259  | -0.0175 | 0.0363  |
| 1IPP | C43  | 943 | 4.526 | 6.170 | 5.456 | 0.1253  | -0.0768 | 0.0666  |
| 1IPP | C44  | 944 | 4.362 | 6.338 | 5.273 | 0.0746  | -0.0927 | 0.0762  |

|      |      |      |       |       |       |         |         |         |
|------|------|------|-------|-------|-------|---------|---------|---------|
| 1IPP | C45  | 945  | 4.337 | 6.634 | 5.269 | 0.0325  | -0.0926 | 0.0640  |
| 1IPP | C46  | 946  | 4.145 | 6.760 | 5.457 | 0.0348  | -0.1325 | 0.0738  |
| 1IPP | C47  | 947  | 4.214 | 6.751 | 5.747 | 0.0669  | -0.1093 | 0.0869  |
| 1IPP | C48  | 948  | 4.130 | 6.526 | 5.924 | 0.1171  | -0.1205 | 0.0809  |
| 1IPP | C49  | 949  | 4.284 | 6.272 | 5.915 | 0.1508  | -0.0972 | 0.0753  |
| 1IPP | C50  | 950  | 4.200 | 6.055 | 5.728 | 0.1694  | -0.1087 | 0.1054  |
| 1IPP | C51  | 951  | 4.038 | 5.811 | 5.777 | 0.2191  | -0.1296 | 0.1136  |
| 1IPP | C52  | 952  | 4.236 | 5.599 | 5.840 | 0.2450  | -0.0949 | 0.1023  |
| 1IPP | C53  | 953  | 4.432 | 5.572 | 5.620 | 0.2320  | -0.0704 | 0.0800  |
| 1IPP | C54  | 954  | 4.352 | 5.336 | 5.463 | 0.2485  | -0.0929 | 0.0864  |
| 1IPP | C55  | 955  | 4.484 | 5.101 | 5.587 | 0.3038  | -0.0651 | 0.0800  |
| 1IPP | C56  | 956  | 4.751 | 4.988 | 5.520 | 0.3114  | -0.0305 | 0.0630  |
| 1IPP | C57  | 957  | 4.759 | 4.775 | 5.314 | 0.3233  | -0.0466 | 0.0772  |
| 1IPP | C58  | 958  | 4.708 | 4.496 | 5.393 | 0.3861  | -0.0292 | 0.0729  |
| 1IPP | C59  | 959  | 4.441 | 4.364 | 5.389 | 0.3964  | -0.0772 | 0.1081  |
| 1IPP | C60  | 960  | 4.341 | 4.198 | 5.164 | 0.4005  | -0.1047 | 0.1289  |
| 1IPP | C61  | 961  | 4.191 | 4.315 | 4.936 | 0.3640  | -0.1269 | 0.1356  |
| 1IPP | C62  | 962  | 3.913 | 4.369 | 5.021 | 0.3545  | -0.1811 | 0.1633  |
| 1IPP | C63  | 963  | 3.884 | 4.634 | 5.150 | 0.3311  | -0.1719 | 0.1721  |
| 1IPP | C64  | 964  | 3.787 | 4.843 | 4.964 | 0.2776  | -0.1929 | 0.1667  |
| 1IPP | C65  | 965  | 4.013 | 4.942 | 4.802 | 0.2453  | -0.1603 | 0.1367  |
| 1IPP | C66  | 966  | 4.076 | 4.841 | 4.530 | 0.2363  | -0.1541 | 0.1384  |
| 1IPP | C67  | 967  | 4.239 | 4.594 | 4.560 | 0.2855  | -0.1265 | 0.1280  |
| 1IPP | C68  | 968  | 4.506 | 4.645 | 4.679 | 0.2792  | -0.0818 | 0.0881  |
| 1IPP | C69  | 969  | 4.485 | 4.652 | 4.975 | 0.3100  | -0.0849 | 0.0956  |
| 1IPP | C70  | 970  | 4.363 | 4.901 | 5.082 | 0.2697  | -0.0990 | 0.1133  |
| 1IPP | C71  | 971  | 4.543 | 5.130 | 5.137 | 0.2641  | -0.0626 | 0.0872  |
| 1IPP | C72  | 972  | 4.522 | 5.400 | 5.020 | 0.1997  | -0.0701 | 0.0793  |
| 1IPP | C73  | 973  | 4.636 | 5.473 | 4.759 | 0.1698  | -0.0624 | 0.0656  |
| 1IPP | C74  | 974  | 4.917 | 5.555 | 4.726 | 0.1479  | -0.0180 | 0.0263  |
| 1IPP | C75  | 975  | 4.885 | 5.848 | 4.714 | 0.1081  | -0.0233 | 0.0215  |
| 1IPP | C76  | 976  | 4.737 | 5.915 | 4.464 | 0.0626  | -0.0541 | 0.0452  |
| 1IPP | C77  | 977  | 4.465 | 6.034 | 4.455 | 0.0427  | -0.0972 | 0.0710  |
| 1IPP | C78  | 978  | 4.216 | 5.890 | 4.528 | 0.0791  | -0.1316 | 0.0968  |
| 1IPP | C79  | 979  | 4.058 | 5.711 | 4.352 | 0.0824  | -0.1590 | 0.1219  |
| 1IPP | C80  | 980  | 3.868 | 5.833 | 4.159 | 0.0524  | -0.1934 | 0.1321  |
| 1IPP | C81  | 981  | 3.908 | 5.830 | 3.866 | 0.0151  | -0.1911 | 0.1252  |
| 1IPP | C82  | 982  | 3.746 | 5.650 | 3.695 | 0.0277  | -0.2253 | 0.1520  |
| 1IPP | C83  | 983  | 3.487 | 5.791 | 3.722 | 0.0032  | -0.2607 | 0.1697  |
| 1IPP | C84  | 984  | 3.356 | 5.776 | 3.989 | 0.0314  | -0.2799 | 0.1848  |
| 1IPP | C85  | 985  | 3.117 | 5.606 | 4.026 | 0.0573  | -0.3112 | 0.2094  |
| 1IPP | C86  | 986  | 2.862 | 5.751 | 3.970 | 0.0396  | -0.3602 | 0.2325  |
| 1IPP | C87  | 987  | 2.796 | 5.889 | 4.223 | 0.0498  | -0.3564 | 0.2419  |
| 1IPP | C88  | 988  | 2.832 | 5.673 | 4.423 | 0.0974  | -0.3519 | 0.2445  |
| 1IPP | C89  | 989  | 3.092 | 5.637 | 4.561 | 0.1139  | -0.3100 | 0.2216  |
| 1IPP | C90  | 990  | 3.295 | 5.432 | 4.486 | 0.1444  | -0.2743 | 0.1980  |
| 1IPP | C91  | 991  | 3.547 | 5.526 | 4.358 | 0.1111  | -0.2373 | 0.1769  |
| 1IPP | C92  | 992  | 3.637 | 5.444 | 4.087 | 0.0961  | -0.2338 | 0.1648  |
| 1IPP | C93  | 993  | 3.845 | 5.235 | 4.051 | 0.1275  | -0.1989 | 0.1454  |
| 1IPP | C94  | 994  | 4.119 | 5.332 | 4.117 | 0.1130  | -0.1611 | 0.1253  |
| 1IPP | C95  | 995  | 4.247 | 5.544 | 3.952 | 0.0731  | -0.1459 | 0.0966  |
| 1IPP | C96  | 996  | 4.441 | 5.496 | 3.732 | 0.0554  | -0.1153 | 0.0879  |
| 1IPP | C97  | 997  | 4.714 | 5.432 | 3.830 | 0.0741  | -0.0706 | 0.0567  |
| 1IPP | C98  | 998  | 4.845 | 5.628 | 4.010 | 0.0585  | -0.0459 | 0.0443  |
| 1IPP | C99  | 999  | 4.778 | 5.519 | 4.277 | 0.1148  | -0.0585 | 0.0440  |
| 1IPP | C100 | 1000 | 4.490 | 5.551 | 4.342 | 0.0992  | -0.0974 | 0.0771  |
| 1IPP | C1   | 1001 | 5.718 | 9.224 | 5.711 | -0.3274 | 0.1242  | -0.1275 |
| 1IPP | C2   | 1002 | 5.527 | 9.059 | 5.555 | -0.3203 | 0.0931  | -0.1056 |
| 1IPP | C3   | 1003 | 5.536 | 9.070 | 5.259 | -0.3519 | 0.0897  | -0.1143 |
| 1IPP | C4   | 1004 | 5.392 | 9.265 | 5.085 | -0.3995 | 0.0595  | -0.0913 |
| 1IPP | C5   | 1005 | 5.106 | 9.264 | 4.999 | -0.4046 | 0.0165  | -0.0682 |
| 1IPP | C6   | 1006 | 5.013 | 9.128 | 4.752 | -0.4157 | -0.0019 | -0.0573 |
| 1IPP | C7   | 1007 | 5.032 | 9.284 | 4.500 | -0.4598 | -0.0041 | -0.0648 |
| 1IPP | C8   | 1008 | 4.841 | 9.492 | 4.404 | -0.5073 | -0.0468 | -0.0554 |
| 1IPP | C9   | 1009 | 4.623 | 9.436 | 4.210 | -0.5054 | -0.0824 | -0.0284 |
| 1IPP | C10  | 1010 | 4.710 | 9.507 | 3.935 | -0.5514 | -0.0633 | -0.0299 |
| 1IPP | C11  | 1011 | 4.880 | 9.274 | 3.868 | -0.5319 | -0.0443 | -0.0534 |
| 1IPP | C12  | 1012 | 5.120 | 9.306 | 4.039 | -0.5074 | -0.0112 | -0.0702 |
| 1IPP | C13  | 1013 | 5.354 | 9.439 | 3.914 | -0.5370 | 0.0316  | -0.1027 |
| 1IPP | C14  | 1014 | 5.535 | 9.261 | 3.760 | -0.5306 | 0.0572  | -0.1072 |
| 1IPP | C15  | 1015 | 5.688 | 9.066 | 3.923 | -0.4835 | 0.0845  | -0.1192 |
| 1IPP | C16  | 1016 | 5.910 | 9.160 | 4.098 | -0.4830 | 0.1228  | -0.1497 |
| 1IPP | C17  | 1017 | 5.931 | 9.104 | 4.390 | -0.4478 | 0.1389  | -0.1513 |

|      |     |      |       |       |       |         |         |         |
|------|-----|------|-------|-------|-------|---------|---------|---------|
| 1IPP | C18 | 1018 | 5.812 | 9.292 | 4.584 | -0.4514 | 0.1148  | -0.1393 |
| 1IPP | C19 | 1019 | 5.522 | 9.256 | 4.628 | -0.4360 | 0.0666  | -0.1083 |
| 1IPP | C20 | 1020 | 5.443 | 9.356 | 4.360 | -0.4864 | 0.0551  | -0.1145 |
| 1IPP | C21 | 1021 | 5.327 | 9.629 | 4.338 | -0.5387 | 0.0328  | -0.1076 |
| 1IPP | C22 | 1022 | 5.506 | 9.867 | 4.356 | -0.5579 | 0.0661  | -0.1191 |
| 1IPP | C23 | 1023 | 5.560 | 9.966 | 4.631 | -0.5488 | 0.0783  | -0.1277 |
| 1IPP | C24 | 1024 | 5.818 | 9.923 | 4.773 | -0.5321 | 0.1315  | -0.1603 |
| 1IPP | C25 | 1025 | 5.920 | 9.648 | 4.825 | -0.4764 | 0.1491  | -0.1595 |
| 1IPP | C26 | 1026 | 5.786 | 9.453 | 5.006 | -0.4383 | 0.1218  | -0.1434 |
| 1IPP | C27 | 1027 | 5.836 | 9.433 | 5.298 | -0.4044 | 0.1522  | -0.1543 |
| 1IPP | C28 | 1028 | 6.070 | 9.257 | 5.349 | -0.3626 | 0.1647  | -0.1598 |
| 1IPP | C29 | 1029 | 6.007 | 8.970 | 5.306 | -0.3273 | 0.1618  | -0.1541 |
| 1IPP | C30 | 1030 | 5.911 | 8.821 | 5.544 | -0.2742 | 0.1550  | -0.1434 |
| 1IPP | C31 | 1031 | 6.088 | 8.618 | 5.667 | -0.2427 | 0.1877  | -0.1550 |
| 1IPP | C32 | 1032 | 6.052 | 8.367 | 5.514 | -0.2141 | 0.1653  | -0.1439 |
| 1IPP | C33 | 1033 | 6.061 | 8.487 | 5.246 | -0.2491 | 0.1778  | -0.1477 |
| 1IPP | C34 | 1034 | 5.823 | 8.574 | 5.095 | -0.2920 | 0.1218  | -0.1245 |
| 1IPP | C35 | 1035 | 5.757 | 8.397 | 4.867 | -0.2801 | 0.1253  | -0.1103 |
| 1IPP | C36 | 1036 | 5.922 | 8.382 | 4.620 | -0.3042 | 0.1374  | -0.1347 |
| 1IPP | C37 | 1037 | 5.948 | 8.624 | 4.451 | -0.3674 | 0.1377  | -0.1444 |
| 1IPP | C38 | 1038 | 5.735 | 8.698 | 4.258 | -0.3868 | 0.1005  | -0.1139 |
| 1IPP | C39 | 1039 | 5.531 | 8.909 | 4.303 | -0.4192 | 0.0663  | -0.1016 |
| 1IPP | C40 | 1040 | 5.295 | 8.897 | 4.481 | -0.3918 | 0.0380  | -0.0732 |
| 1IPP | C41 | 1041 | 5.034 | 8.790 | 4.393 | -0.4031 | -0.0052 | -0.0589 |
| 1IPP | C42 | 1042 | 4.869 | 8.948 | 4.205 | -0.4339 | -0.0454 | -0.0366 |
| 1IPP | C43 | 1043 | 4.959 | 8.818 | 3.953 | -0.4437 | -0.0227 | -0.0391 |
| 1IPP | C44 | 1044 | 5.190 | 8.939 | 3.813 | -0.4702 | 0.0007  | -0.0663 |
| 1IPP | C45 | 1045 | 5.177 | 9.062 | 3.544 | -0.5206 | 0.0003  | -0.0808 |
| 1IPP | C46 | 1046 | 5.257 | 8.882 | 3.322 | -0.5144 | 0.0046  | -0.0769 |
| 1IPP | C47 | 1047 | 5.550 | 8.878 | 3.264 | -0.5229 | 0.0579  | -0.1068 |
| 1IPP | C48 | 1048 | 5.750 | 8.682 | 3.368 | -0.4781 | 0.0718  | -0.1264 |
| 1IPP | C49 | 1049 | 5.837 | 8.729 | 3.648 | -0.4607 | 0.1063  | -0.1191 |
| 1IPP | C50 | 1050 | 6.062 | 8.917 | 3.700 | -0.4853 | 0.1273  | -0.1688 |
| 1IPP | C51 | 1051 | 6.288 | 8.809 | 3.857 | -0.4452 | 0.1808  | -0.1560 |
| 1IPP | C52 | 1052 | 6.198 | 8.833 | 4.137 | -0.4127 | 0.1528  | -0.1856 |
| 1IPP | C53 | 1053 | 6.355 | 8.943 | 4.363 | -0.4157 | 0.1994  | -0.1910 |
| 1IPP | C54 | 1054 | 6.465 | 8.715 | 4.518 | -0.3650 | 0.2169  | -0.1973 |
| 1IPP | C55 | 1055 | 6.313 | 8.578 | 4.733 | -0.3241 | 0.2022  | -0.1672 |
| 1IPP | C56 | 1056 | 6.372 | 8.693 | 4.998 | -0.3156 | 0.2134  | -0.1792 |
| 1IPP | C57 | 1057 | 6.662 | 8.632 | 4.996 | -0.3008 | 0.2509  | -0.2069 |
| 1IPP | C58 | 1058 | 6.800 | 8.375 | 5.047 | -0.2616 | 0.2827  | -0.2204 |
| 1IPP | C59 | 1059 | 6.877 | 8.357 | 5.331 | -0.2295 | 0.2981  | -0.2222 |
| 1IPP | C60 | 1060 | 7.125 | 8.510 | 5.377 | -0.2504 | 0.3385  | -0.2594 |
| 1IPP | C61 | 1061 | 7.101 | 8.791 | 5.466 | -0.2901 | 0.3434  | -0.2608 |
| 1IPP | C62 | 1062 | 7.102 | 9.005 | 5.259 | -0.3378 | 0.3247  | -0.2615 |
| 1IPP | C63 | 1063 | 6.864 | 9.177 | 5.205 | -0.3686 | 0.2974  | -0.2467 |
| 1IPP | C64 | 1064 | 6.641 | 9.068 | 5.041 | -0.3687 | 0.2593  | -0.2214 |
| 1IPP | C65 | 1065 | 6.573 | 9.088 | 4.753 | -0.4104 | 0.2352  | -0.2117 |
| 1IPP | C66 | 1066 | 6.329 | 9.253 | 4.711 | -0.4366 | 0.2044  | -0.1880 |
| 1IPP | C67 | 1067 | 6.119 | 9.143 | 4.890 | -0.3990 | 0.1677  | -0.1739 |
| 1IPP | C68 | 1068 | 5.975 | 8.890 | 4.832 | -0.3635 | 0.1611  | -0.1502 |
| 1IPP | C69 | 1069 | 5.697 | 8.848 | 4.733 | -0.3650 | 0.0982  | -0.1137 |
| 1IPP | C70 | 1070 | 5.454 | 8.846 | 4.906 | -0.3492 | 0.0724  | -0.0934 |
| 1IPP | C71 | 1071 | 5.381 | 8.636 | 5.106 | -0.3021 | 0.0555  | -0.0895 |
| 1IPP | C72 | 1072 | 5.381 | 8.640 | 5.403 | -0.2684 | 0.0704  | -0.0862 |
| 1IPP | C73 | 1073 | 5.612 | 8.511 | 5.537 | -0.2366 | 0.0940  | -0.1118 |
| 1IPP | C74 | 1074 | 5.612 | 8.220 | 5.488 | -0.1952 | 0.1076  | -0.1021 |
| 1IPP | C75 | 1075 | 5.557 | 8.198 | 5.197 | -0.2214 | 0.0888  | -0.0829 |
| 1IPP | C76 | 1076 | 5.276 | 8.173 | 5.105 | -0.2219 | 0.0488  | -0.0599 |
| 1IPP | C77 | 1077 | 5.061 | 8.322 | 5.244 | -0.2283 | 0.0054  | -0.0423 |
| 1IPP | C78 | 1078 | 4.862 | 8.502 | 5.115 | -0.2831 | -0.0177 | -0.0333 |
| 1IPP | C79 | 1079 | 4.964 | 8.764 | 5.024 | -0.3272 | -0.0002 | -0.0442 |
| 1IPP | C80 | 1080 | 5.026 | 8.923 | 5.266 | -0.3195 | 0.0094  | -0.0527 |
| 1IPP | C81 | 1081 | 4.789 | 9.045 | 5.396 | -0.3338 | -0.0164 | -0.0383 |
| 1IPP | C82 | 1082 | 4.670 | 9.290 | 5.276 | -0.3719 | -0.0512 | -0.0256 |
| 1IPP | C83 | 1083 | 4.375 | 9.319 | 5.241 | -0.3959 | -0.0842 | 0.0050  |
| 1IPP | C84 | 1084 | 4.209 | 9.222 | 5.014 | -0.3979 | -0.1272 | 0.0190  |
| 1IPP | C85 | 1085 | 4.213 | 9.439 | 4.810 | -0.4531 | -0.1170 | 0.0060  |
| 1IPP | C86 | 1086 | 4.459 | 9.408 | 4.647 | -0.4651 | -0.0904 | -0.0128 |
| 1IPP | C87 | 1087 | 4.692 | 9.438 | 4.830 | -0.4434 | -0.0381 | -0.0330 |
| 1IPP | C88 | 1088 | 4.840 | 9.691 | 4.874 | -0.4889 | -0.0325 | -0.0500 |
| 1IPP | C89 | 1089 | 5.079 | 9.749 | 4.707 | -0.5086 | 0.0092  | -0.0847 |
| 1IPP | C90 | 1090 | 5.325 | 9.620 | 4.809 | -0.4829 | 0.0477  | -0.0999 |

|      |      |      |       |       |       |         |         |         |
|------|------|------|-------|-------|-------|---------|---------|---------|
| 1IPP | C91  | 1091 | 5.460 | 9.757 | 5.036 | -0.4756 | 0.0691  | -0.1111 |
| 1IPP | C92  | 1092 | 5.359 | 9.740 | 5.315 | -0.4479 | 0.0605  | -0.1072 |
| 1IPP | C93  | 1093 | 5.395 | 9.491 | 5.472 | -0.3936 | 0.0748  | -0.1130 |
| 1IPP | C94  | 1094 | 5.155 | 9.314 | 5.474 | -0.3704 | 0.0425  | -0.0762 |
| 1IPP | C95  | 1095 | 5.068 | 9.169 | 5.718 | -0.3217 | 0.0298  | -0.0630 |
| 1IPP | C96  | 1096 | 5.145 | 8.881 | 5.731 | -0.2692 | 0.0384  | -0.0716 |
| 1IPP | C97  | 1097 | 4.986 | 8.650 | 5.632 | -0.2406 | 0.0246  | -0.0450 |
| 1IPP | C98  | 1098 | 4.814 | 8.514 | 5.834 | -0.2071 | -0.0187 | -0.0233 |
| 1IPP | C99  | 1099 | 4.920 | 8.457 | 6.107 | -0.1622 | -0.0005 | -0.0242 |
| 1IPP | C100 | 1100 | 5.077 | 8.222 | 6.199 | -0.1237 | 0.0436  | -0.0416 |
| 1IPP | C1   | 1101 | 5.970 | 7.992 | 5.265 | -0.1852 | 0.1654  | -0.1332 |
| 1IPP | C2   | 1102 | 6.008 | 7.712 | 5.359 | -0.1253 | 0.1583  | -0.1218 |
| 1IPP | C3   | 1103 | 5.969 | 7.501 | 5.157 | -0.1207 | 0.1518  | -0.1145 |
| 1IPP | C4   | 1104 | 5.687 | 7.420 | 5.111 | -0.0936 | 0.1035  | -0.0839 |
| 1IPP | C5   | 1105 | 5.502 | 7.576 | 4.940 | -0.1460 | 0.0820  | -0.0741 |
| 1IPP | C6   | 1106 | 5.262 | 7.734 | 5.011 | -0.1565 | 0.0379  | -0.0523 |
| 1IPP | C7   | 1107 | 4.983 | 7.631 | 5.019 | -0.1645 | -0.0013 | -0.0294 |
| 1IPP | C8   | 1108 | 4.814 | 7.613 | 4.775 | -0.1646 | -0.0280 | 0.0049  |
| 1IPP | C9   | 1109 | 4.636 | 7.822 | 4.660 | -0.2268 | -0.0607 | 0.0094  |
| 1IPP | C10  | 1110 | 4.704 | 7.947 | 4.398 | -0.2655 | -0.0645 | 0.0040  |
| 1IPP | C11  | 1111 | 4.866 | 8.186 | 4.332 | -0.3010 | -0.0367 | -0.0187 |
| 1IPP | C12  | 1112 | 4.772 | 8.441 | 4.215 | -0.3581 | -0.0587 | -0.0216 |
| 1IPP | C13  | 1113 | 4.767 | 8.388 | 3.923 | -0.3835 | -0.0549 | -0.0100 |
| 1IPP | C14  | 1114 | 5.033 | 8.274 | 3.856 | -0.3724 | -0.0242 | -0.0367 |
| 1IPP | C15  | 1115 | 5.082 | 8.013 | 3.986 | -0.3095 | -0.0037 | -0.0329 |
| 1IPP | C16  | 1116 | 5.254 | 7.958 | 4.223 | -0.2873 | 0.0181  | -0.0477 |
| 1IPP | C17  | 1117 | 5.151 | 7.855 | 4.484 | -0.2351 | 0.0141  | -0.0509 |
| 1IPP | C18  | 1118 | 5.088 | 8.021 | 4.723 | -0.2321 | 0.0112  | -0.0391 |
| 1IPP | C19  | 1119 | 4.856 | 8.195 | 4.785 | -0.2574 | -0.0360 | -0.0268 |
| 1IPP | C20  | 1120 | 4.924 | 8.457 | 4.666 | -0.3167 | -0.0151 | -0.0294 |
| 1IPP | C21  | 1121 | 5.205 | 8.513 | 4.735 | -0.3077 | 0.0344  | -0.0678 |
| 1IPP | C22  | 1122 | 5.444 | 8.469 | 4.565 | -0.3298 | 0.0542  | -0.0893 |
| 1IPP | C23  | 1123 | 5.486 | 8.176 | 4.542 | -0.2856 | 0.0682  | -0.0939 |
| 1IPP | C24  | 1124 | 5.553 | 7.991 | 4.764 | -0.2307 | 0.0752  | -0.0823 |
| 1IPP | C25  | 1125 | 5.826 | 7.898 | 4.836 | -0.2037 | 0.1242  | -0.1100 |
| 1IPP | C26  | 1126 | 5.932 | 7.666 | 4.684 | -0.1841 | 0.1505  | -0.1213 |
| 1IPP | C27  | 1127 | 5.886 | 7.374 | 4.729 | -0.1464 | 0.1314  | -0.0992 |
| 1IPP | C28  | 1128 | 5.889 | 7.158 | 4.525 | -0.1110 | 0.1267  | -0.1081 |
| 1IPP | C29  | 1129 | 5.663 | 7.042 | 4.376 | -0.1193 | 0.0823  | -0.0814 |
| 1IPP | C30  | 1130 | 5.597 | 6.804 | 4.538 | -0.0757 | 0.0875  | -0.0635 |
| 1IPP | C31  | 1131 | 5.753 | 6.550 | 4.543 | -0.0231 | 0.1028  | -0.0813 |
| 1IPP | C32  | 1132 | 6.037 | 6.542 | 4.633 | -0.0193 | 0.1491  | -0.1071 |
| 1IPP | C33  | 1133 | 6.245 | 6.547 | 4.421 | -0.0359 | 0.1789  | -0.1197 |
| 1IPP | C34  | 1134 | 6.312 | 6.816 | 4.314 | -0.0951 | 0.1922  | -0.1327 |
| 1IPP | C35  | 1135 | 6.118 | 6.955 | 4.137 | -0.1264 | 0.1519  | -0.1134 |
| 1IPP | C36  | 1136 | 6.110 | 6.874 | 3.851 | -0.1520 | 0.1424  | -0.1179 |
| 1IPP | C37  | 1137 | 6.271 | 7.011 | 3.642 | -0.1905 | 0.1650  | -0.1392 |
| 1IPP | C38  | 1138 | 6.201 | 7.291 | 3.576 | -0.2374 | 0.1592  | -0.1343 |
| 1IPP | C39  | 1139 | 6.012 | 7.408 | 3.378 | -0.2690 | 0.1176  | -0.1185 |
| 1IPP | C40  | 1140 | 6.124 | 7.536 | 3.135 | -0.3153 | 0.1366  | -0.1378 |
| 1IPP | C41  | 1141 | 6.210 | 7.822 | 3.141 | -0.3665 | 0.1444  | -0.1481 |
| 1IPP | C42  | 1142 | 6.027 | 8.052 | 3.084 | -0.4088 | 0.1127  | -0.1475 |
| 1IPP | C43  | 1143 | 5.963 | 8.263 | 3.285 | -0.4231 | 0.1195  | -0.1308 |
| 1IPP | C44  | 1144 | 5.763 | 8.239 | 3.503 | -0.4069 | 0.0891  | -0.1054 |
| 1IPP | C45  | 1145 | 5.478 | 8.318 | 3.515 | -0.4005 | 0.0555  | -0.0858 |
| 1IPP | C46  | 1146 | 5.400 | 8.577 | 3.634 | -0.4330 | 0.0249  | -0.0800 |
| 1IPP | C47  | 1147 | 5.458 | 8.622 | 3.920 | -0.4172 | 0.0525  | -0.0988 |
| 1IPP | C48  | 1148 | 5.333 | 8.452 | 4.128 | -0.3696 | 0.0304  | -0.0655 |
| 1IPP | C49  | 1149 | 5.584 | 8.295 | 4.133 | -0.3388 | 0.0712  | -0.0891 |
| 1IPP | C50  | 1150 | 5.655 | 8.100 | 3.923 | -0.3291 | 0.0859  | -0.0961 |
| 1IPP | C51  | 1151 | 5.669 | 7.825 | 4.035 | -0.2753 | 0.0802  | -0.0941 |
| 1IPP | C52  | 1152 | 5.746 | 7.860 | 4.319 | -0.2580 | 0.1010  | -0.1032 |
| 1IPP | C53  | 1153 | 5.996 | 8.018 | 4.342 | -0.2761 | 0.1384  | -0.1332 |
| 1IPP | C54  | 1154 | 6.224 | 7.960 | 4.159 | -0.2880 | 0.1732  | -0.1459 |
| 1IPP | C55  | 1155 | 6.417 | 7.738 | 4.194 | -0.2487 | 0.2006  | -0.1734 |
| 1IPP | C56  | 1156 | 6.610 | 7.751 | 4.420 | -0.2308 | 0.2338  | -0.1767 |
| 1IPP | C57  | 1157 | 6.576 | 7.581 | 4.660 | -0.1640 | 0.2392  | -0.1899 |
| 1IPP | C58  | 1158 | 6.341 | 7.608 | 4.838 | -0.1726 | 0.2033  | -0.1499 |
| 1IPP | C59  | 1159 | 6.369 | 7.762 | 5.088 | -0.1578 | 0.2187  | -0.1583 |
| 1IPP | C60  | 1160 | 6.528 | 7.647 | 5.311 | -0.1319 | 0.2438  | -0.1765 |
| 1IPP | C61  | 1161 | 6.393 | 7.537 | 5.552 | -0.0745 | 0.2343  | -0.1603 |
| 1IPP | C62  | 1162 | 6.280 | 7.263 | 5.558 | -0.0361 | 0.2128  | -0.1374 |
| 1IPP | C63  | 1163 | 6.495 | 7.060 | 5.549 | -0.0012 | 0.2344  | -0.1590 |

|      |      |      |       |       |       |         |         |         |
|------|------|------|-------|-------|-------|---------|---------|---------|
| 1IPP | C64  | 1164 | 6.587 | 7.189 | 5.301 | -0.0488 | 0.2535  | -0.1811 |
| 1IPP | C65  | 1165 | 6.375 | 7.277 | 5.112 | -0.0824 | 0.2139  | -0.1502 |
| 1IPP | C66  | 1166 | 6.251 | 7.151 | 4.873 | -0.0915 | 0.1965  | -0.1404 |
| 1IPP | C67  | 1167 | 6.324 | 7.195 | 4.588 | -0.1249 | 0.1981  | -0.1418 |
| 1IPP | C68  | 1168 | 6.233 | 7.434 | 4.435 | -0.1798 | 0.1760  | -0.1491 |
| 1IPP | C69  | 1169 | 5.993 | 7.492 | 4.268 | -0.1968 | 0.1388  | -0.1133 |
| 1IPP | C70  | 1170 | 5.992 | 7.444 | 3.977 | -0.2208 | 0.1419  | -0.1191 |
| 1IPP | C71  | 1171 | 6.137 | 7.644 | 3.812 | -0.2713 | 0.1411  | -0.1322 |
| 1IPP | C72  | 1172 | 6.005 | 7.893 | 3.720 | -0.3228 | 0.1319  | -0.1273 |
| 1IPP | C73  | 1173 | 5.766 | 7.808 | 3.567 | -0.3220 | 0.0842  | -0.1053 |
| 1IPP | C74  | 1174 | 5.731 | 7.777 | 3.275 | -0.3510 | 0.0729  | -0.0966 |
| 1IPP | C75  | 1175 | 5.540 | 7.984 | 3.182 | -0.3943 | 0.0350  | -0.0863 |
| 1IPP | C76  | 1176 | 5.287 | 7.926 | 3.326 | -0.3652 | 0.0059  | -0.0597 |
| 1IPP | C77  | 1177 | 5.302 | 7.924 | 3.623 | -0.3394 | 0.0188  | -0.0626 |
| 1IPP | C78  | 1178 | 5.322 | 7.684 | 3.799 | -0.2829 | 0.0143  | -0.0548 |
| 1IPP | C79  | 1179 | 5.076 | 7.566 | 3.917 | -0.2467 | -0.0084 | -0.0353 |
| 1IPP | C80  | 1180 | 4.926 | 7.614 | 4.168 | -0.2307 | -0.0258 | -0.0140 |
| 1IPP | C81  | 1181 | 4.981 | 7.446 | 4.408 | -0.1839 | -0.0185 | -0.0172 |
| 1IPP | C82  | 1182 | 4.811 | 7.216 | 4.486 | -0.1429 | -0.0423 | 0.0088  |
| 1IPP | C83  | 1183 | 4.548 | 7.263 | 4.617 | -0.1237 | -0.0717 | 0.0351  |
| 1IPP | C84  | 1184 | 4.509 | 7.304 | 4.909 | -0.1105 | -0.0796 | 0.0291  |
| 1IPP | C85  | 1185 | 4.539 | 7.122 | 5.140 | -0.0614 | -0.0649 | 0.0376  |
| 1IPP | C86  | 1186 | 4.795 | 7.233 | 5.238 | -0.0648 | -0.0231 | 0.0031  |
| 1IPP | C87  | 1187 | 4.843 | 7.391 | 5.485 | -0.0645 | -0.0055 | -0.0065 |
| 1IPP | C88  | 1188 | 4.823 | 7.687 | 5.506 | -0.1023 | -0.0054 | 0.0048  |
| 1IPP | C89  | 1189 | 5.018 | 7.874 | 5.383 | -0.1454 | 0.0066  | -0.0279 |
| 1IPP | C90  | 1190 | 5.298 | 7.902 | 5.477 | -0.1486 | 0.0699  | -0.0560 |
| 1IPP | C91  | 1191 | 5.539 | 7.777 | 5.357 | -0.1373 | 0.0854  | -0.0804 |
| 1IPP | C92  | 1192 | 5.508 | 7.517 | 5.491 | -0.0895 | 0.0883  | -0.0705 |
| 1IPP | C93  | 1193 | 5.260 | 7.431 | 5.352 | -0.0773 | 0.0466  | -0.0423 |
| 1IPP | C94  | 1194 | 5.234 | 7.242 | 5.122 | -0.0802 | 0.0429  | -0.0275 |
| 1IPP | C95  | 1195 | 5.165 | 7.274 | 4.834 | -0.1177 | 0.0285  | -0.0347 |
| 1IPP | C96  | 1196 | 5.394 | 7.266 | 4.646 | -0.1322 | 0.0538  | -0.0559 |
| 1IPP | C97  | 1197 | 5.510 | 7.502 | 4.508 | -0.1707 | 0.0745  | -0.0662 |
| 1IPP | C98  | 1198 | 5.401 | 7.528 | 4.235 | -0.2166 | 0.0503  | -0.0597 |
| 1IPP | C99  | 1199 | 5.510 | 7.326 | 4.048 | -0.2023 | 0.0587  | -0.0664 |
| 1IPP | C100 | 1200 | 5.320 | 7.188 | 3.866 | -0.1953 | 0.0235  | -0.0354 |
| 1IPP | C1   | 1201 | 7.035 | 7.394 | 3.243 | -0.2940 | 0.2757  | -0.2189 |
| 1IPP | C2   | 1202 | 7.294 | 7.539 | 3.270 | -0.3151 | 0.3242  | -0.2655 |
| 1IPP | C3   | 1203 | 7.438 | 7.498 | 3.526 | -0.2682 | 0.3452  | -0.2624 |
| 1IPP | C4   | 1204 | 7.297 | 7.657 | 3.732 | -0.2917 | 0.3341  | -0.2434 |
| 1IPP | C5   | 1205 | 7.354 | 7.946 | 3.772 | -0.3242 | 0.3357  | -0.2756 |
| 1IPP | C6   | 1206 | 7.575 | 8.019 | 3.957 | -0.3152 | 0.3734  | -0.2812 |
| 1IPP | C7   | 1207 | 7.485 | 8.000 | 4.239 | -0.2866 | 0.3833  | -0.2873 |
| 1IPP | C8   | 1208 | 7.372 | 8.242 | 4.367 | -0.2982 | 0.3595  | -0.2744 |
| 1IPP | C9   | 1209 | 7.532 | 8.406 | 4.555 | -0.3141 | 0.3842  | -0.3025 |
| 1IPP | C10  | 1210 | 7.520 | 8.324 | 4.841 | -0.2761 | 0.3917  | -0.2905 |
| 1IPP | C11  | 1211 | 7.247 | 8.372 | 4.948 | -0.2648 | 0.3500  | -0.2658 |
| 1IPP | C12  | 1212 | 7.181 | 8.663 | 4.954 | -0.3128 | 0.3341  | -0.2727 |
| 1IPP | C13  | 1213 | 6.991 | 8.800 | 4.771 | -0.3494 | 0.3137  | -0.2536 |
| 1IPP | C14  | 1214 | 7.040 | 8.858 | 4.484 | -0.3959 | 0.3097  | -0.2463 |
| 1IPP | C15  | 1215 | 6.890 | 8.697 | 4.283 | -0.3796 | 0.2788  | -0.2402 |
| 1IPP | C16  | 1216 | 6.996 | 8.432 | 4.203 | -0.3530 | 0.2864  | -0.2518 |
| 1IPP | C17  | 1217 | 7.166 | 8.371 | 3.966 | -0.3710 | 0.3153  | -0.2500 |
| 1IPP | C18  | 1218 | 7.017 | 8.318 | 3.713 | -0.3869 | 0.2894  | -0.2607 |
| 1IPP | C19  | 1219 | 6.914 | 8.040 | 3.698 | -0.3509 | 0.2643  | -0.2233 |
| 1IPP | C20  | 1220 | 6.962 | 7.833 | 3.491 | -0.3334 | 0.2785  | -0.2208 |
| 1IPP | C21  | 1221 | 6.738 | 7.772 | 3.306 | -0.3491 | 0.2284  | -0.1954 |
| 1IPP | C22  | 1222 | 6.529 | 7.577 | 3.390 | -0.3044 | 0.2041  | -0.1815 |
| 1IPP | C23  | 1223 | 6.604 | 7.295 | 3.333 | -0.2701 | 0.2181  | -0.1788 |
| 1IPP | C24  | 1224 | 6.709 | 7.111 | 3.542 | -0.2129 | 0.2384  | -0.1721 |
| 1IPP | C25  | 1225 | 6.974 | 7.179 | 3.659 | -0.2110 | 0.2741  | -0.2093 |
| 1IPP | C26  | 1226 | 7.239 | 7.078 | 3.565 | -0.2145 | 0.3281  | -0.2377 |
| 1IPP | C27  | 1227 | 7.358 | 6.833 | 3.688 | -0.1574 | 0.3347  | -0.2400 |
| 1IPP | C28  | 1228 | 7.491 | 6.852 | 3.954 | -0.1226 | 0.3709  | -0.2489 |
| 1IPP | C29  | 1229 | 7.776 | 6.876 | 4.033 | -0.1359 | 0.4090  | -0.2743 |
| 1IPP | C30  | 1230 | 7.922 | 6.625 | 4.099 | -0.0879 | 0.4370  | -0.2925 |
| 1IPP | C31  | 1231 | 7.840 | 6.470 | 4.340 | -0.0324 | 0.4271  | -0.2871 |
| 1IPP | C32  | 1232 | 7.869 | 6.593 | 4.609 | -0.0221 | 0.4346  | -0.2914 |
| 1IPP | C33  | 1233 | 7.590 | 6.685 | 4.653 | -0.0347 | 0.4007  | -0.2537 |
| 1IPP | C34  | 1234 | 7.468 | 6.811 | 4.413 | -0.0812 | 0.3583  | -0.2539 |
| 1IPP | C35  | 1235 | 7.517 | 7.100 | 4.370 | -0.1400 | 0.3813  | -0.2505 |
| 1IPP | C36  | 1236 | 7.393 | 7.210 | 4.615 | -0.1152 | 0.3633  | -0.2602 |

|      |      |      |       |       |       |         |        |         |
|------|------|------|-------|-------|-------|---------|--------|---------|
| 1IPP | C37  | 1237 | 7.098 | 7.196 | 4.593 | -0.1212 | 0.3216 | -0.2228 |
| 1IPP | C38  | 1238 | 6.931 | 7.410 | 4.474 | -0.1661 | 0.2848 | -0.2104 |
| 1IPP | C39  | 1239 | 6.917 | 7.495 | 4.190 | -0.2146 | 0.2819 | -0.2078 |
| 1IPP | C40  | 1240 | 7.097 | 7.720 | 4.113 | -0.2546 | 0.3153 | -0.2433 |
| 1IPP | C41  | 1241 | 7.003 | 7.977 | 4.225 | -0.2751 | 0.2886 | -0.2355 |
| 1IPP | C42  | 1242 | 6.734 | 8.060 | 4.131 | -0.3096 | 0.2606 | -0.2096 |
| 1IPP | C43  | 1243 | 6.638 | 8.286 | 3.965 | -0.3529 | 0.2317 | -0.2003 |
| 1IPP | C44  | 1244 | 6.505 | 8.498 | 4.122 | -0.3824 | 0.2175 | -0.1931 |
| 1IPP | C45  | 1245 | 6.234 | 8.402 | 4.197 | -0.3515 | 0.1847 | -0.1634 |
| 1IPP | C46  | 1246 | 6.017 | 8.433 | 3.998 | -0.3758 | 0.1340 | -0.1427 |
| 1IPP | C47  | 1247 | 6.120 | 8.329 | 3.741 | -0.3835 | 0.1470 | -0.1538 |
| 1IPP | C48  | 1248 | 6.258 | 8.500 | 3.541 | -0.4303 | 0.1694 | -0.1652 |
| 1IPP | C49  | 1249 | 6.552 | 8.467 | 3.558 | -0.4307 | 0.2127 | -0.1947 |
| 1IPP | C50  | 1250 | 6.599 | 8.220 | 3.400 | -0.3884 | 0.2237 | -0.2014 |
| 1IPP | C51  | 1251 | 6.411 | 8.017 | 3.510 | -0.3632 | 0.1796 | -0.1639 |
| 1IPP | C52  | 1252 | 6.486 | 7.912 | 3.776 | -0.3170 | 0.2023 | -0.1814 |
| 1IPP | C53  | 1253 | 6.678 | 7.691 | 3.830 | -0.2796 | 0.2401 | -0.1936 |
| 1IPP | C54  | 1254 | 6.554 | 7.424 | 3.824 | -0.2375 | 0.2191 | -0.1696 |
| 1IPP | C55  | 1255 | 6.413 | 7.302 | 4.055 | -0.1860 | 0.2103 | -0.1580 |
| 1IPP | C56  | 1256 | 6.605 | 7.167 | 4.235 | -0.1546 | 0.2342 | -0.1875 |
| 1IPP | C57  | 1257 | 6.689 | 7.020 | 3.994 | -0.1566 | 0.2352 | -0.1749 |
| 1IPP | C58  | 1258 | 6.557 | 6.775 | 3.896 | -0.1227 | 0.2219 | -0.1612 |
| 1IPP | C59  | 1259 | 6.730 | 6.539 | 3.932 | -0.0819 | 0.2481 | -0.1726 |
| 1IPP | C60  | 1260 | 6.939 | 6.509 | 3.722 | -0.1040 | 0.2729 | -0.1946 |
| 1IPP | C61  | 1261 | 6.912 | 6.320 | 3.494 | -0.0919 | 0.2666 | -0.1867 |
| 1IPP | C62  | 1262 | 6.997 | 6.039 | 3.550 | -0.0576 | 0.2742 | -0.1965 |
| 1IPP | C63  | 1263 | 7.283 | 5.964 | 3.593 | -0.0279 | 0.3317 | -0.2138 |
| 1IPP | C64  | 1264 | 7.426 | 5.994 | 3.852 | -0.0119 | 0.3647 | -0.2302 |
| 1IPP | C65  | 1265 | 7.525 | 6.272 | 3.893 | -0.0457 | 0.3681 | -0.2375 |
| 1IPP | C66  | 1266 | 7.433 | 6.430 | 4.127 | -0.0522 | 0.3610 | -0.2480 |
| 1IPP | C67  | 1267 | 7.159 | 6.542 | 4.146 | -0.0597 | 0.3142 | -0.2134 |
| 1IPP | C68  | 1268 | 7.068 | 6.805 | 4.039 | -0.1227 | 0.2904 | -0.2164 |
| 1IPP | C69  | 1269 | 7.115 | 7.072 | 4.160 | -0.1456 | 0.3162 | -0.2198 |
| 1IPP | C70  | 1270 | 7.254 | 7.265 | 3.983 | -0.1946 | 0.3325 | -0.2343 |
| 1IPP | C71  | 1271 | 7.544 | 7.314 | 3.956 | -0.2082 | 0.3763 | -0.2697 |
| 1IPP | C72  | 1272 | 7.577 | 7.578 | 4.085 | -0.2363 | 0.3816 | -0.2823 |
| 1IPP | C73  | 1273 | 7.539 | 7.561 | 4.378 | -0.2050 | 0.3828 | -0.2837 |
| 1IPP | C74  | 1274 | 7.302 | 7.660 | 4.527 | -0.2082 | 0.3566 | -0.2534 |
| 1IPP | C75  | 1275 | 7.350 | 7.914 | 4.673 | -0.2316 | 0.3543 | -0.2651 |
| 1IPP | C76  | 1276 | 7.508 | 7.883 | 4.922 | -0.1907 | 0.3882 | -0.2837 |
| 1IPP | C77  | 1277 | 7.399 | 7.921 | 5.195 | -0.1782 | 0.3744 | -0.2712 |
| 1IPP | C78  | 1278 | 7.457 | 8.189 | 5.312 | -0.2102 | 0.3944 | -0.2858 |
| 1IPP | C79  | 1279 | 7.728 | 8.235 | 5.427 | -0.1957 | 0.4388 | -0.3034 |
| 1IPP | C80  | 1280 | 7.814 | 8.040 | 5.635 | -0.1525 | 0.4483 | -0.3058 |
| 1IPP | C81  | 1281 | 8.020 | 7.864 | 5.513 | -0.1377 | 0.4767 | -0.3442 |
| 1IPP | C82  | 1282 | 7.916 | 7.810 | 5.241 | -0.1374 | 0.4669 | -0.3047 |
| 1IPP | C83  | 1283 | 7.718 | 7.595 | 5.188 | -0.1271 | 0.4162 | -0.3033 |
| 1IPP | C84  | 1284 | 7.755 | 7.350 | 5.030 | -0.0976 | 0.4375 | -0.2841 |
| 1IPP | C85  | 1285 | 7.756 | 7.474 | 4.762 | -0.1456 | 0.4205 | -0.2930 |
| 1IPP | C86  | 1286 | 8.048 | 7.456 | 4.718 | -0.1501 | 0.4780 | -0.3239 |
| 1IPP | C87  | 1287 | 8.184 | 7.592 | 4.943 | -0.1529 | 0.4961 | -0.3424 |
| 1IPP | C88  | 1288 | 8.197 | 7.875 | 4.855 | -0.2048 | 0.4952 | -0.3439 |
| 1IPP | C89  | 1289 | 7.934 | 8.003 | 4.798 | -0.2296 | 0.4570 | -0.3298 |
| 1IPP | C90  | 1290 | 7.805 | 7.876 | 4.562 | -0.2268 | 0.4307 | -0.3129 |
| 1IPP | C91  | 1291 | 7.972 | 7.772 | 4.339 | -0.2315 | 0.4452 | -0.3285 |
| 1IPP | C92  | 1292 | 7.986 | 7.492 | 4.231 | -0.2043 | 0.4560 | -0.3219 |
| 1IPP | C93  | 1293 | 8.129 | 7.251 | 4.332 | -0.1606 | 0.4667 | -0.3250 |
| 1IPP | C94  | 1294 | 7.962 | 7.022 | 4.422 | -0.1099 | 0.4478 | -0.3077 |
| 1IPP | C95  | 1295 | 7.828 | 7.050 | 4.685 | -0.0920 | 0.4310 | -0.3012 |
| 1IPP | C96  | 1296 | 7.972 | 6.955 | 4.924 | -0.0523 | 0.4527 | -0.3060 |
| 1IPP | C97  | 1297 | 8.239 | 7.084 | 4.919 | -0.0736 | 0.5077 | -0.3413 |
| 1IPP | C98  | 1298 | 8.435 | 6.926 | 4.761 | -0.0590 | 0.5313 | -0.3624 |
| 1IPP | C99  | 1299 | 8.478 | 6.963 | 4.469 | -0.0962 | 0.5306 | -0.3552 |
| 1IPP | C100 | 1300 | 8.328 | 6.819 | 4.255 | -0.0917 | 0.5089 | -0.3427 |
| 1IPP | C1   | 1301 | 6.327 | 4.656 | 6.880 | 0.5000  | 0.2509 | -0.0962 |
| 1IPP | C2   | 1302 | 6.453 | 4.683 | 6.612 | 0.4743  | 0.2675 | -0.0946 |
| 1IPP | C3   | 1303 | 6.657 | 4.502 | 6.492 | 0.4842  | 0.2867 | -0.1186 |
| 1IPP | C4   | 1304 | 6.939 | 4.519 | 6.583 | 0.4939  | 0.3357 | -0.1478 |
| 1IPP | C5   | 1305 | 7.094 | 4.767 | 6.529 | 0.4515  | 0.3562 | -0.1626 |
| 1IPP | C6   | 1306 | 7.124 | 4.851 | 6.246 | 0.4125  | 0.3614 | -0.1736 |
| 1IPP | C7   | 1307 | 7.316 | 4.701 | 6.077 | 0.4226  | 0.3864 | -0.1909 |
| 1IPP | C8   | 1308 | 7.606 | 4.735 | 6.128 | 0.4191  | 0.4365 | -0.2219 |
| 1IPP | C9   | 1309 | 7.679 | 5.017 | 6.075 | 0.3620  | 0.4410 | -0.2274 |

|      |     |      |       |       |       |        |        |         |
|------|-----|------|-------|-------|-------|--------|--------|---------|
| 1IPP | C10 | 1310 | 7.667 | 5.113 | 5.795 | 0.3185 | 0.4281 | -0.2248 |
| 1IPP | C11 | 1311 | 7.915 | 5.146 | 5.635 | 0.3029 | 0.4741 | -0.2623 |
| 1IPP | C12 | 1312 | 8.005 | 4.892 | 5.509 | 0.3358 | 0.4907 | -0.2597 |
| 1IPP | C13 | 1313 | 7.834 | 4.797 | 5.285 | 0.3130 | 0.4417 | -0.2457 |
| 1IPP | C14 | 1314 | 7.575 | 4.830 | 5.424 | 0.3329 | 0.4144 | -0.2220 |
| 1IPP | C15 | 1315 | 7.516 | 4.667 | 5.665 | 0.3764 | 0.4018 | -0.2115 |
| 1IPP | C16 | 1316 | 7.309 | 4.453 | 5.667 | 0.4085 | 0.3795 | -0.1834 |
| 1IPP | C17 | 1317 | 7.030 | 4.540 | 5.724 | 0.4128 | 0.3379 | -0.1510 |
| 1IPP | C18 | 1318 | 6.893 | 4.534 | 5.988 | 0.4294 | 0.3159 | -0.1401 |
| 1IPP | C19 | 1319 | 6.694 | 4.319 | 6.038 | 0.4734 | 0.2958 | -0.1192 |
| 1IPP | C20 | 1320 | 6.406 | 4.368 | 5.976 | 0.4564 | 0.2420 | -0.0915 |
| 1IPP | C21 | 1321 | 6.295 | 4.515 | 6.208 | 0.4492 | 0.2340 | -0.0799 |
| 1IPP | C22 | 1322 | 6.361 | 4.804 | 6.188 | 0.4154 | 0.2426 | -0.0901 |
| 1IPP | C23 | 1323 | 6.649 | 4.870 | 6.210 | 0.4032 | 0.2859 | -0.1193 |
| 1IPP | C24 | 1324 | 6.748 | 5.034 | 6.436 | 0.3954 | 0.3018 | -0.1463 |
| 1IPP | C25 | 1325 | 6.813 | 5.308 | 6.348 | 0.3410 | 0.3109 | -0.1421 |
| 1IPP | C26 | 1326 | 6.996 | 5.293 | 6.115 | 0.3340 | 0.3372 | -0.1783 |
| 1IPP | C27 | 1327 | 7.290 | 5.244 | 6.094 | 0.3267 | 0.3824 | -0.1981 |
| 1IPP | C28 | 1328 | 7.481 | 5.467 | 6.045 | 0.2998 | 0.4036 | -0.2294 |
| 1IPP | C29 | 1329 | 7.574 | 5.552 | 5.774 | 0.2655 | 0.4179 | -0.2354 |
| 1IPP | C30 | 1330 | 7.850 | 5.637 | 5.706 | 0.2362 | 0.4588 | -0.2588 |
| 1IPP | C31 | 1331 | 7.893 | 5.930 | 5.672 | 0.1848 | 0.4683 | -0.2860 |
| 1IPP | C32 | 1332 | 7.824 | 6.036 | 5.404 | 0.1413 | 0.4480 | -0.2637 |
| 1IPP | C33 | 1333 | 7.529 | 6.059 | 5.376 | 0.1387 | 0.4081 | -0.2361 |
| 1IPP | C34 | 1334 | 7.414 | 5.785 | 5.382 | 0.1770 | 0.3892 | -0.2214 |
| 1IPP | C35 | 1335 | 7.335 | 5.633 | 5.138 | 0.1736 | 0.3680 | -0.2101 |
| 1IPP | C36 | 1336 | 7.041 | 5.629 | 5.091 | 0.1776 | 0.3116 | -0.1856 |
| 1IPP | C37 | 1337 | 6.853 | 5.487 | 5.274 | 0.2124 | 0.3037 | -0.1581 |
| 1IPP | C38 | 1338 | 6.793 | 5.200 | 5.318 | 0.2542 | 0.2817 | -0.1492 |
| 1IPP | C39 | 1339 | 6.578 | 5.051 | 5.180 | 0.2653 | 0.2680 | -0.1220 |
| 1IPP | C40 | 1340 | 6.685 | 4.806 | 5.049 | 0.2932 | 0.2571 | -0.1329 |
| 1IPP | C41 | 1341 | 6.921 | 4.864 | 4.880 | 0.2746 | 0.2952 | -0.1614 |
| 1IPP | C42 | 1342 | 6.916 | 4.928 | 4.590 | 0.2373 | 0.2923 | -0.1584 |
| 1IPP | C43 | 1343 | 7.020 | 4.688 | 4.451 | 0.2543 | 0.3021 | -0.1554 |
| 1IPP | C44 | 1344 | 7.315 | 4.655 | 4.483 | 0.2644 | 0.3368 | -0.1820 |
| 1IPP | C45 | 1345 | 7.432 | 4.482 | 4.696 | 0.3041 | 0.3788 | -0.1949 |
| 1IPP | C46 | 1346 | 7.508 | 4.570 | 4.970 | 0.3278 | 0.3861 | -0.2027 |
| 1IPP | C47 | 1347 | 7.342 | 4.503 | 5.207 | 0.3592 | 0.3707 | -0.1937 |
| 1IPP | C48 | 1348 | 7.108 | 4.671 | 5.277 | 0.3459 | 0.3346 | -0.1733 |
| 1IPP | C49 | 1349 | 7.143 | 4.931 | 5.416 | 0.3132 | 0.3457 | -0.1689 |
| 1IPP | C50 | 1350 | 7.189 | 4.981 | 5.705 | 0.3392 | 0.3545 | -0.1857 |
| 1IPP | C51 | 1351 | 6.921 | 4.980 | 5.832 | 0.3511 | 0.3152 | -0.1479 |
| 1IPP | C52 | 1352 | 6.718 | 5.180 | 5.744 | 0.3062 | 0.2840 | -0.1331 |
| 1IPP | C53 | 1353 | 6.704 | 5.471 | 5.804 | 0.2686 | 0.2832 | -0.1476 |
| 1IPP | C54 | 1354 | 6.705 | 5.709 | 5.624 | 0.2149 | 0.2747 | -0.1472 |
| 1IPP | C55 | 1355 | 6.919 | 5.860 | 5.479 | 0.1748 | 0.3116 | -0.1751 |
| 1IPP | C56 | 1356 | 7.098 | 6.066 | 5.595 | 0.1595 | 0.3370 | -0.1968 |
| 1IPP | C57 | 1357 | 6.987 | 6.221 | 5.824 | 0.1525 | 0.3286 | -0.1787 |
| 1IPP | C58 | 1358 | 7.147 | 6.266 | 6.069 | 0.1674 | 0.3516 | -0.2056 |
| 1IPP | C59 | 1359 | 7.129 | 6.089 | 6.306 | 0.2222 | 0.3636 | -0.2113 |
| 1IPP | C60 | 1360 | 6.948 | 6.192 | 6.517 | 0.2220 | 0.3311 | -0.1907 |
| 1IPP | C61 | 1361 | 7.093 | 6.431 | 6.621 | 0.2095 | 0.3732 | -0.2112 |
| 1IPP | C62 | 1362 | 7.062 | 6.696 | 6.488 | 0.1473 | 0.3509 | -0.2146 |
| 1IPP | C63 | 1363 | 7.166 | 6.693 | 6.209 | 0.1155 | 0.3599 | -0.2125 |
| 1IPP | C64 | 1364 | 7.456 | 6.699 | 6.143 | 0.1124 | 0.4070 | -0.2455 |
| 1IPP | C65 | 1365 | 7.594 | 6.437 | 6.177 | 0.1559 | 0.4277 | -0.2630 |
| 1IPP | C66 | 1366 | 7.687 | 6.254 | 5.961 | 0.1579 | 0.4529 | -0.2625 |
| 1IPP | C67 | 1367 | 7.483 | 6.091 | 5.819 | 0.1684 | 0.3983 | -0.2363 |
| 1IPP | C68 | 1368 | 7.335 | 5.875 | 5.961 | 0.2166 | 0.3917 | -0.2270 |
| 1IPP | C69 | 1369 | 7.108 | 5.712 | 5.859 | 0.2492 | 0.3363 | -0.1837 |
| 1IPP | C70 | 1370 | 7.137 | 5.446 | 5.730 | 0.2601 | 0.3544 | -0.1883 |
| 1IPP | C71 | 1371 | 7.234 | 5.369 | 5.462 | 0.2473 | 0.3581 | -0.1970 |
| 1IPP | C72 | 1372 | 7.509 | 5.272 | 5.407 | 0.2676 | 0.4033 | -0.2177 |
| 1IPP | C73 | 1373 | 7.735 | 5.446 | 5.325 | 0.2213 | 0.4300 | -0.2511 |
| 1IPP | C74 | 1374 | 7.971 | 5.335 | 5.183 | 0.2248 | 0.4690 | -0.2623 |
| 1IPP | C75 | 1375 | 8.220 | 5.260 | 5.326 | 0.2550 | 0.5125 | -0.3013 |
| 1IPP | C76 | 1376 | 8.395 | 5.489 | 5.401 | 0.2251 | 0.5430 | -0.3221 |
| 1IPP | C77 | 1377 | 8.289 | 5.652 | 5.625 | 0.2234 | 0.5294 | -0.3068 |
| 1IPP | C78 | 1378 | 8.360 | 5.592 | 5.906 | 0.2581 | 0.5451 | -0.3031 |
| 1IPP | C79 | 1379 | 8.212 | 5.351 | 5.997 | 0.3089 | 0.5247 | -0.2934 |
| 1IPP | C80 | 1380 | 7.927 | 5.388 | 6.071 | 0.3099 | 0.4813 | -0.2734 |
| 1IPP | C81 | 1381 | 7.822 | 5.441 | 6.344 | 0.3223 | 0.4682 | -0.2557 |
| 1IPP | C82 | 1382 | 7.735 | 5.217 | 6.521 | 0.3792 | 0.4543 | -0.2398 |

|      |      |      |       |       |       |         |         |         |
|------|------|------|-------|-------|-------|---------|---------|---------|
| 1IPP | C83  | 1383 | 7.475 | 5.078 | 6.475 | 0.3995  | 0.4278  | -0.2130 |
| 1IPP | C84  | 1384 | 7.219 | 5.211 | 6.543 | 0.3893  | 0.3710  | -0.1934 |
| 1IPP | C85  | 1385 | 7.133 | 5.216 | 6.827 | 0.4066  | 0.3711  | -0.1757 |
| 1IPP | C86  | 1386 | 7.029 | 4.967 | 6.952 | 0.4692  | 0.3581  | -0.1651 |
| 1IPP | C87  | 1387 | 6.754 | 4.911 | 6.858 | 0.4608  | 0.3068  | -0.1356 |
| 1IPP | C88  | 1388 | 6.584 | 5.149 | 6.913 | 0.4314  | 0.2960  | -0.1199 |
| 1IPP | C89  | 1389 | 6.593 | 5.386 | 6.733 | 0.3819  | 0.2844  | -0.1308 |
| 1IPP | C90  | 1390 | 6.825 | 5.574 | 6.746 | 0.3483  | 0.3211  | -0.1563 |
| 1IPP | C91  | 1391 | 6.938 | 5.719 | 6.511 | 0.2996  | 0.3409  | -0.1689 |
| 1IPP | C92  | 1392 | 7.171 | 5.622 | 6.353 | 0.3200  | 0.3701  | -0.1877 |
| 1IPP | C93  | 1393 | 7.440 | 5.686 | 6.458 | 0.2884  | 0.4167  | -0.2312 |
| 1IPP | C94  | 1394 | 7.582 | 5.916 | 6.334 | 0.2536  | 0.4288  | -0.2453 |
| 1IPP | C95  | 1395 | 7.763 | 5.835 | 6.113 | 0.2338  | 0.4531  | -0.2547 |
| 1IPP | C96  | 1396 | 8.053 | 5.829 | 6.173 | 0.2546  | 0.4972  | -0.2869 |
| 1IPP | C97  | 1397 | 8.173 | 6.091 | 6.102 | 0.2003  | 0.5151  | -0.3085 |
| 1IPP | C98  | 1398 | 8.282 | 6.075 | 5.827 | 0.1781  | 0.5329  | -0.3119 |
| 1IPP | C99  | 1399 | 8.569 | 6.018 | 5.773 | 0.1884  | 0.5798  | -0.3467 |
| 1IPP | C100 | 1400 | 8.730 | 6.240 | 5.660 | 0.1310  | 0.5965  | -0.3563 |
| 1IPP | C1   | 1401 | 4.175 | 6.776 | 3.141 | -0.2087 | -0.1713 | 0.0855  |
| 1IPP | C2   | 1402 | 4.083 | 7.016 | 3.292 | -0.2327 | -0.1834 | 0.0885  |
| 1IPP | C3   | 1403 | 3.902 | 6.951 | 3.518 | -0.1897 | -0.2078 | 0.0953  |
| 1IPP | C4   | 1404 | 3.606 | 6.920 | 3.497 | -0.1878 | -0.2503 | 0.1329  |
| 1IPP | C5   | 1405 | 3.422 | 6.952 | 3.727 | -0.1739 | -0.2638 | 0.1581  |
| 1IPP | C6   | 1406 | 3.342 | 6.711 | 3.885 | -0.1208 | -0.2803 | 0.1689  |
| 1IPP | C7   | 1407 | 3.081 | 6.576 | 3.846 | -0.1077 | -0.3338 | 0.1901  |
| 1IPP | C8   | 1408 | 2.829 | 6.610 | 3.998 | -0.0988 | -0.3539 | 0.2261  |
| 1IPP | C9   | 1409 | 2.704 | 6.365 | 4.110 | -0.0427 | -0.3843 | 0.2422  |
| 1IPP | C10  | 1410 | 2.641 | 6.308 | 4.394 | -0.0031 | -0.3823 | 0.2362  |
| 1IPP | C11  | 1411 | 2.861 | 6.208 | 4.563 | 0.0235  | -0.3438 | 0.2297  |
| 1IPP | C12  | 1412 | 2.973 | 6.377 | 4.779 | 0.0240  | -0.3192 | 0.2180  |
| 1IPP | C13  | 1413 | 3.162 | 6.601 | 4.733 | -0.0216 | -0.2908 | 0.1825  |
| 1IPP | C14  | 1414 | 3.431 | 6.497 | 4.671 | 0.0002  | -0.2519 | 0.1570  |
| 1IPP | C15  | 1415 | 3.396 | 6.541 | 4.380 | -0.0454 | -0.2659 | 0.1712  |
| 1IPP | C16  | 1416 | 3.143 | 6.434 | 4.269 | -0.0383 | -0.3081 | 0.1924  |
| 1IPP | C17  | 1417 | 3.146 | 6.172 | 4.131 | -0.0075 | -0.3025 | 0.2013  |
| 1IPP | C18  | 1418 | 3.330 | 6.203 | 3.901 | -0.0505 | -0.2865 | 0.1849  |
| 1IPP | C19  | 1419 | 3.616 | 6.181 | 3.972 | -0.0197 | -0.2363 | 0.1534  |
| 1IPP | C20  | 1420 | 3.679 | 6.463 | 4.027 | -0.0661 | -0.2329 | 0.1342  |
| 1IPP | C21  | 1421 | 3.794 | 6.604 | 3.795 | -0.1186 | -0.2192 | 0.1330  |
| 1IPP | C22  | 1422 | 4.085 | 6.654 | 3.827 | -0.1126 | -0.1677 | 0.0826  |
| 1IPP | C23  | 1423 | 4.113 | 6.933 | 3.916 | -0.1483 | -0.1579 | 0.0760  |
| 1IPP | C24  | 1424 | 3.926 | 6.948 | 4.147 | -0.1274 | -0.1868 | 0.1047  |
| 1IPP | C25  | 1425 | 3.630 | 6.949 | 4.133 | -0.1323 | -0.2273 | 0.1353  |
| 1IPP | C26  | 1426 | 3.493 | 7.213 | 4.120 | -0.1734 | -0.2489 | 0.1398  |
| 1IPP | C27  | 1427 | 3.420 | 7.349 | 4.374 | -0.1767 | -0.2575 | 0.1441  |
| 1IPP | C28  | 1428 | 3.159 | 7.349 | 4.516 | -0.1460 | -0.3041 | 0.1714  |
| 1IPP | C29  | 1429 | 2.997 | 7.599 | 4.513 | -0.2068 | -0.3233 | 0.1822  |
| 1IPP | C30  | 1430 | 3.089 | 7.825 | 4.683 | -0.2146 | -0.3001 | 0.1622  |
| 1IPP | C31  | 1431 | 3.232 | 8.057 | 4.565 | -0.2583 | -0.2742 | 0.1405  |
| 1IPP | C32  | 1432 | 3.513 | 7.999 | 4.491 | -0.2735 | -0.2404 | 0.1103  |
| 1IPP | C33  | 1433 | 3.715 | 7.912 | 4.689 | -0.2180 | -0.2128 | 0.1083  |
| 1IPP | C34  | 1434 | 3.721 | 7.616 | 4.666 | -0.1798 | -0.1986 | 0.1064  |
| 1IPP | C35  | 1435 | 3.552 | 7.408 | 4.794 | -0.1338 | -0.2299 | 0.1336  |
| 1IPP | C36  | 1436 | 3.611 | 7.302 | 5.065 | -0.0926 | -0.2186 | 0.1186  |
| 1IPP | C37  | 1437 | 3.773 | 7.062 | 5.132 | -0.0476 | -0.1845 | 0.1199  |
| 1IPP | C38  | 1438 | 4.070 | 7.087 | 5.141 | -0.0474 | -0.1379 | 0.0814  |
| 1IPP | C39  | 1439 | 4.161 | 7.021 | 4.868 | -0.0749 | -0.1294 | 0.0790  |
| 1IPP | C40  | 1440 | 4.108 | 6.730 | 4.843 | -0.0238 | -0.1378 | 0.0858  |
| 1IPP | C41  | 1441 | 3.818 | 6.670 | 4.866 | -0.0206 | -0.1929 | 0.1254  |
| 1IPP | C42  | 1442 | 3.687 | 6.589 | 5.120 | 0.0280  | -0.1940 | 0.1287  |
| 1IPP | C43  | 1443 | 3.600 | 6.305 | 5.132 | 0.0717  | -0.2158 | 0.1563  |
| 1IPP | C44  | 1444 | 3.320 | 6.241 | 5.051 | 0.0694  | -0.2644 | 0.1874  |
| 1IPP | C45  | 1445 | 3.272 | 6.041 | 4.837 | 0.0705  | -0.2702 | 0.1826  |
| 1IPP | C46  | 1446 | 3.288 | 6.089 | 4.545 | 0.0431  | -0.2739 | 0.1875  |
| 1IPP | C47  | 1447 | 3.530 | 6.026 | 4.387 | 0.0521  | -0.2384 | 0.1578  |
| 1IPP | C48  | 1448 | 3.767 | 6.176 | 4.487 | 0.0175  | -0.1896 | 0.1353  |
| 1IPP | C49  | 1449 | 3.829 | 6.465 | 4.452 | -0.0184 | -0.2033 | 0.1273  |
| 1IPP | C50  | 1450 | 4.046 | 6.545 | 4.268 | -0.0446 | -0.1612 | 0.1058  |
| 1IPP | C51  | 1451 | 4.299 | 6.658 | 4.367 | -0.0711 | -0.1209 | 0.0632  |
| 1IPP | C52  | 1452 | 4.281 | 6.947 | 4.437 | -0.1000 | -0.1315 | 0.0659  |
| 1IPP | C53  | 1453 | 4.305 | 7.162 | 4.232 | -0.1487 | -0.1223 | 0.0535  |
| 1IPP | C54  | 1454 | 4.523 | 7.349 | 4.165 | -0.1941 | -0.0933 | 0.0350  |
| 1IPP | C55  | 1455 | 4.451 | 7.614 | 4.277 | -0.2138 | -0.1076 | 0.0302  |



|      |      |      |       |       |       |         |         |        |
|------|------|------|-------|-------|-------|---------|---------|--------|
| 1IPP | C56  | 1456 | 4.306 | 7.834 | 4.136 | -0.2777 | -0.1310 | 0.0468 |
| 1IPP | C57  | 1457 | 4.457 | 8.071 | 4.035 | -0.3132 | -0.1051 | 0.0189 |
| 1IPP | C58  | 1458 | 4.530 | 8.017 | 3.753 | -0.3373 | -0.1032 | 0.0170 |
| 1IPP | C59  | 1459 | 4.674 | 7.759 | 3.763 | -0.2914 | -0.0869 | 0.0093 |
| 1IPP | C60  | 1460 | 4.446 | 7.569 | 3.791 | -0.2648 | -0.1215 | 0.0305 |
| 1IPP | C61  | 1461 | 4.348 | 7.365 | 3.600 | -0.2478 | -0.1258 | 0.0573 |
| 1IPP | C62  | 1462 | 4.237 | 7.466 | 3.344 | -0.2834 | -0.1475 | 0.0541 |
| 1IPP | C63  | 1463 | 3.972 | 7.595 | 3.310 | -0.3112 | -0.1941 | 0.0825 |
| 1IPP | C64  | 1464 | 3.768 | 7.383 | 3.341 | -0.2785 | -0.2276 | 0.1104 |
| 1IPP | C65  | 1465 | 3.659 | 7.371 | 3.615 | -0.2589 | -0.2405 | 0.1106 |
| 1IPP | C66  | 1466 | 3.839 | 7.265 | 3.824 | -0.2071 | -0.2105 | 0.1146 |
| 1IPP | C67  | 1467 | 4.006 | 7.418 | 4.017 | -0.2207 | -0.1767 | 0.0797 |
| 1IPP | C68  | 1468 | 3.886 | 7.421 | 4.289 | -0.1903 | -0.1827 | 0.0935 |
| 1IPP | C69  | 1469 | 3.930 | 7.248 | 4.527 | -0.1394 | -0.1757 | 0.0984 |
| 1IPP | C70  | 1470 | 3.790 | 6.988 | 4.566 | -0.0894 | -0.2060 | 0.1128 |
| 1IPP | C71  | 1471 | 3.496 | 6.943 | 4.580 | -0.0914 | -0.2470 | 0.1465 |
| 1IPP | C72  | 1472 | 3.325 | 7.024 | 4.808 | -0.0730 | -0.2636 | 0.1582 |
| 1IPP | C73  | 1473 | 3.334 | 6.908 | 5.081 | -0.0292 | -0.2630 | 0.1513 |
| 1IPP | C74  | 1474 | 3.181 | 6.676 | 5.187 | 0.0140  | -0.2893 | 0.1874 |
| 1IPP | C75  | 1475 | 2.903 | 6.690 | 5.087 | 0.0067  | -0.3294 | 0.2202 |
| 1IPP | C76  | 1476 | 2.774 | 6.955 | 5.054 | -0.0443 | -0.3439 | 0.2242 |
| 1IPP | C77  | 1477 | 2.866 | 7.103 | 4.815 | -0.0795 | -0.3305 | 0.2095 |
| 1IPP | C78  | 1478 | 2.751 | 7.057 | 4.546 | -0.1105 | -0.3580 | 0.2184 |
| 1IPP | C79  | 1479 | 2.882 | 6.835 | 4.398 | -0.0862 | -0.3437 | 0.2096 |
| 1IPP | C80  | 1480 | 3.131 | 6.896 | 4.247 | -0.1051 | -0.3109 | 0.1782 |
| 1IPP | C81  | 1481 | 3.092 | 7.069 | 4.009 | -0.1646 | -0.3219 | 0.1870 |
| 1IPP | C82  | 1482 | 2.908 | 7.021 | 3.782 | -0.1734 | -0.3422 | 0.2087 |
| 1IPP | C83  | 1483 | 2.981 | 6.868 | 3.539 | -0.1764 | -0.3586 | 0.1894 |
| 1IPP | C84  | 1484 | 3.165 | 6.965 | 3.329 | -0.2136 | -0.3296 | 0.1838 |
| 1IPP | C85  | 1485 | 3.076 | 7.097 | 3.079 | -0.2601 | -0.3371 | 0.1867 |
| 1IPP | C86  | 1486 | 3.139 | 7.387 | 3.094 | -0.3080 | -0.3421 | 0.1640 |
| 1IPP | C87  | 1487 | 3.297 | 7.430 | 3.343 | -0.2795 | -0.3046 | 0.1542 |
| 1IPP | C88  | 1488 | 3.181 | 7.342 | 3.603 | -0.2479 | -0.3139 | 0.1708 |
| 1IPP | C89  | 1489 | 2.995 | 7.511 | 3.763 | -0.2579 | -0.3385 | 0.1922 |
| 1IPP | C90  | 1490 | 3.011 | 7.515 | 4.059 | -0.2270 | -0.3262 | 0.1712 |
| 1IPP | C91  | 1491 | 2.818 | 7.337 | 4.199 | -0.1879 | -0.3627 | 0.2074 |
| 1IPP | C92  | 1492 | 2.546 | 7.421 | 4.280 | -0.1897 | -0.4023 | 0.2267 |
| 1IPP | C93  | 1493 | 2.524 | 7.579 | 4.530 | -0.1889 | -0.3948 | 0.2297 |
| 1IPP | C94  | 1494 | 2.583 | 7.465 | 4.798 | -0.1514 | -0.3783 | 0.2272 |
| 1IPP | C95  | 1495 | 2.816 | 7.571 | 4.951 | -0.1364 | -0.3461 | 0.2074 |
| 1IPP | C96  | 1496 | 3.092 | 7.460 | 4.967 | -0.1346 | -0.3008 | 0.1686 |
| 1IPP | C97  | 1497 | 3.095 | 7.275 | 5.198 | -0.0816 | -0.2781 | 0.1827 |
| 1IPP | C98  | 1498 | 3.061 | 7.441 | 5.441 | -0.0911 | -0.2901 | 0.1716 |
| 1IPP | C99  | 1499 | 2.783 | 7.527 | 5.506 | -0.0722 | -0.3404 | 0.2031 |
| 1IPP | C100 | 1500 | 2.639 | 7.740 | 5.356 | -0.1329 | -0.3629 | 0.2070 |
| 1IPP | C1   | 1501 | 3.348 | 5.859 | 3.240 | -0.0510 | -0.2938 | 0.1844 |
| 1IPP | C2   | 1502 | 3.315 | 6.141 | 3.152 | -0.1041 | -0.3114 | 0.1722 |
| 1IPP | C3   | 1503 | 3.190 | 6.197 | 2.889 | -0.1423 | -0.3364 | 0.2006 |
| 1IPP | C4   | 1504 | 3.341 | 6.276 | 2.646 | -0.1689 | -0.3250 | 0.1698 |
| 1IPP | C5   | 1505 | 3.264 | 6.514 | 2.484 | -0.2276 | -0.3298 | 0.1746 |
| 1IPP | C6   | 1506 | 3.396 | 6.779 | 2.486 | -0.2656 | -0.2961 | 0.1654 |
| 1IPP | C7   | 1507 | 3.301 | 6.983 | 2.681 | -0.2838 | -0.3222 | 0.1554 |
| 1IPP | C8   | 1508 | 3.082 | 7.177 | 2.629 | -0.3235 | -0.3507 | 0.1809 |
| 1IPP | C9   | 1509 | 3.140 | 7.450 | 2.529 | -0.3677 | -0.3433 | 0.1748 |
| 1IPP | C10  | 1510 | 3.125 | 7.575 | 2.259 | -0.4127 | -0.3561 | 0.1627 |
| 1IPP | C11  | 1511 | 3.330 | 7.550 | 2.045 | -0.4321 | -0.3205 | 0.1517 |
| 1IPP | C12  | 1512 | 3.604 | 7.665 | 2.054 | -0.4621 | -0.2918 | 0.1112 |
| 1IPP | C13  | 1513 | 3.824 | 7.465 | 2.030 | -0.4245 | -0.2485 | 0.1002 |
| 1IPP | C14  | 1514 | 3.946 | 7.338 | 2.269 | -0.3897 | -0.2261 | 0.0888 |
| 1IPP | C15  | 1515 | 3.772 | 7.163 | 2.433 | -0.3379 | -0.2466 | 0.1127 |
| 1IPP | C16  | 1516 | 3.594 | 7.313 | 2.614 | -0.3427 | -0.2691 | 0.1301 |
| 1IPP | C17  | 1517 | 3.684 | 7.290 | 2.894 | -0.3092 | -0.2521 | 0.1156 |
| 1IPP | C18  | 1518 | 3.517 | 7.130 | 3.078 | -0.2746 | -0.2706 | 0.1361 |
| 1IPP | C19  | 1519 | 3.504 | 6.835 | 3.079 | -0.2168 | -0.2762 | 0.1558 |
| 1IPP | C20  | 1520 | 3.293 | 6.649 | 2.982 | -0.2072 | -0.3174 | 0.1705 |
| 1IPP | C21  | 1521 | 3.087 | 6.555 | 3.175 | -0.1607 | -0.3431 | 0.1953 |
| 1IPP | C22  | 1522 | 3.175 | 6.456 | 3.441 | -0.1216 | -0.3151 | 0.1826 |
| 1IPP | C23  | 1523 | 3.458 | 6.415 | 3.523 | -0.1084 | -0.2726 | 0.1606 |
| 1IPP | C24  | 1524 | 3.622 | 6.164 | 3.515 | -0.0713 | -0.2353 | 0.1602 |
| 1IPP | C25  | 1525 | 3.762 | 6.033 | 3.284 | -0.0764 | -0.2360 | 0.1308 |
| 1IPP | C26  | 1526 | 4.038 | 6.071 | 3.177 | -0.0918 | -0.2007 | 0.1192 |
| 1IPP | C27  | 1527 | 4.080 | 6.325 | 3.028 | -0.1480 | -0.1884 | 0.0928 |
| 1IPP | C28  | 1528 | 4.137 | 6.393 | 2.747 | -0.1967 | -0.1875 | 0.0993 |

|      |      |      |       |       |       |         |         |         |
|------|------|------|-------|-------|-------|---------|---------|---------|
| 1IPP | C29  | 1529 | 4.387 | 6.538 | 2.682 | -0.2129 | -0.1422 | 0.0680  |
| 1IPP | C30  | 1530 | 4.653 | 6.410 | 2.644 | -0.1927 | -0.1062 | 0.0408  |
| 1IPP | C31  | 1531 | 4.863 | 6.399 | 2.856 | -0.1581 | -0.0610 | 0.0177  |
| 1IPP | C32  | 1532 | 5.075 | 6.607 | 2.878 | -0.2143 | -0.0441 | -0.0059 |
| 1IPP | C33  | 1533 | 5.055 | 6.845 | 3.056 | -0.2229 | -0.0332 | -0.0090 |
| 1IPP | C34  | 1534 | 4.962 | 7.110 | 2.960 | -0.2802 | -0.0644 | -0.0006 |
| 1IPP | C35  | 1535 | 5.137 | 7.346 | 2.918 | -0.3029 | -0.0141 | -0.0215 |
| 1IPP | C36  | 1536 | 5.141 | 7.560 | 3.124 | -0.3380 | -0.0190 | -0.0347 |
| 1IPP | C37  | 1537 | 4.892 | 7.719 | 3.148 | -0.3499 | -0.0537 | -0.0186 |
| 1IPP | C38  | 1538 | 4.704 | 7.593 | 3.341 | -0.3207 | -0.0857 | 0.0029  |
| 1IPP | C39  | 1539 | 4.662 | 7.315 | 3.245 | -0.2856 | -0.0866 | 0.0191  |
| 1IPP | C40  | 1540 | 4.501 | 7.323 | 2.997 | -0.2983 | -0.1222 | 0.0409  |
| 1IPP | C41  | 1541 | 4.632 | 7.317 | 2.731 | -0.3283 | -0.1087 | 0.0201  |
| 1IPP | C42  | 1542 | 4.812 | 7.551 | 2.698 | -0.3737 | -0.0795 | -0.0049 |
| 1IPP | C43  | 1543 | 4.640 | 7.788 | 2.735 | -0.3968 | -0.1054 | 0.0183  |
| 1IPP | C44  | 1544 | 4.422 | 7.768 | 2.535 | -0.4235 | -0.1434 | 0.0346  |
| 1IPP | C45  | 1545 | 4.273 | 7.512 | 2.515 | -0.3772 | -0.1684 | 0.0466  |
| 1IPP | C46  | 1546 | 4.073 | 7.391 | 2.699 | -0.3346 | -0.1896 | 0.0783  |
| 1IPP | C47  | 1547 | 4.121 | 7.142 | 2.854 | -0.2905 | -0.1792 | 0.0785  |
| 1IPP | C48  | 1548 | 4.043 | 6.890 | 2.716 | -0.2721 | -0.2056 | 0.0844  |
| 1IPP | C49  | 1549 | 3.767 | 6.782 | 2.726 | -0.2500 | -0.2398 | 0.1184  |
| 1IPP | C50  | 1550 | 3.720 | 6.511 | 2.838 | -0.1951 | -0.2536 | 0.1312  |
| 1IPP | C51  | 1551 | 3.660 | 6.439 | 3.120 | -0.1517 | -0.2606 | 0.1362  |
| 1IPP | C52  | 1552 | 3.831 | 6.549 | 3.337 | -0.1502 | -0.2237 | 0.1153  |
| 1IPP | C53  | 1553 | 4.068 | 6.416 | 3.455 | -0.1122 | -0.1717 | 0.1020  |
| 1IPP | C54  | 1554 | 4.049 | 6.208 | 3.666 | -0.0691 | -0.1682 | 0.1132  |
| 1IPP | C55  | 1555 | 4.093 | 6.230 | 3.959 | -0.0394 | -0.1728 | 0.0927  |
| 1IPP | C56  | 1556 | 4.375 | 6.224 | 4.052 | -0.0285 | -0.1150 | 0.0695  |
| 1IPP | C57  | 1557 | 4.474 | 5.949 | 3.997 | 0.0140  | -0.1018 | 0.0669  |
| 1IPP | C58  | 1558 | 4.611 | 5.920 | 3.734 | -0.0199 | -0.0886 | 0.0482  |
| 1IPP | C59  | 1559 | 4.422 | 5.976 | 3.511 | -0.0509 | -0.1261 | 0.0802  |
| 1IPP | C60  | 1560 | 4.177 | 5.809 | 3.512 | -0.0014 | -0.1529 | 0.0975  |
| 1IPP | C61  | 1561 | 4.130 | 5.560 | 3.358 | 0.0045  | -0.1832 | 0.1092  |
| 1IPP | C62  | 1562 | 4.005 | 5.581 | 3.089 | -0.0267 | -0.1873 | 0.1241  |
| 1IPP | C63  | 1563 | 3.711 | 5.626 | 3.085 | -0.0274 | -0.2387 | 0.1492  |
| 1IPP | C64  | 1564 | 3.595 | 5.791 | 2.866 | -0.0766 | -0.2790 | 0.1666  |
| 1IPP | C65  | 1565 | 3.706 | 6.064 | 2.835 | -0.1168 | -0.2440 | 0.1435  |
| 1IPP | C66  | 1566 | 3.937 | 6.008 | 2.658 | -0.1309 | -0.2165 | 0.1211  |
| 1IPP | C67  | 1567 | 4.188 | 5.896 | 2.771 | -0.0976 | -0.1808 | 0.0996  |
| 1IPP | C68  | 1568 | 4.438 | 6.050 | 2.824 | -0.1290 | -0.1369 | 0.0760  |
| 1IPP | C69  | 1569 | 4.533 | 6.147 | 3.089 | -0.1159 | -0.1184 | 0.0524  |
| 1IPP | C70  | 1570 | 4.474 | 6.421 | 3.187 | -0.1500 | -0.1201 | 0.0571  |
| 1IPP | C71  | 1571 | 4.640 | 6.662 | 3.139 | -0.1887 | -0.0888 | 0.0343  |
| 1IPP | C72  | 1572 | 4.580 | 6.879 | 2.945 | -0.2458 | -0.1086 | 0.0380  |
| 1IPP | C73  | 1573 | 4.674 | 6.863 | 2.664 | -0.2558 | -0.1040 | 0.0201  |
| 1IPP | C74  | 1574 | 4.941 | 6.929 | 2.550 | -0.2895 | -0.0676 | 0.0002  |
| 1IPP | C75  | 1575 | 4.970 | 7.204 | 2.445 | -0.3372 | -0.0681 | -0.0007 |
| 1IPP | C76  | 1576 | 4.791 | 7.189 | 2.208 | -0.3650 | -0.0875 | 0.0070  |
| 1IPP | C77  | 1577 | 4.502 | 7.243 | 2.255 | -0.3612 | -0.1359 | 0.0368  |
| 1IPP | C78  | 1578 | 4.338 | 7.051 | 2.413 | -0.3201 | -0.1598 | 0.0634  |
| 1IPP | C79  | 1579 | 4.203 | 6.814 | 2.292 | -0.2971 | -0.1836 | 0.0715  |
| 1IPP | C80  | 1580 | 3.907 | 6.777 | 2.281 | -0.2911 | -0.2384 | 0.1084  |
| 1IPP | C81  | 1581 | 3.711 | 6.835 | 2.064 | -0.3283 | -0.2630 | 0.1259  |
| 1IPP | C82  | 1582 | 3.572 | 7.097 | 2.032 | -0.3745 | -0.2844 | 0.1292  |
| 1IPP | C83  | 1583 | 3.371 | 7.153 | 2.243 | -0.3518 | -0.3260 | 0.1570  |
| 1IPP | C84  | 1584 | 3.102 | 7.040 | 2.197 | -0.3453 | -0.3643 | 0.1788  |
| 1IPP | C85  | 1585 | 2.855 | 7.201 | 2.171 | -0.3628 | -0.3933 | 0.2034  |
| 1IPP | C86  | 1586 | 2.651 | 7.177 | 2.387 | -0.3412 | -0.4156 | 0.2289  |
| 1IPP | C87  | 1587 | 2.624 | 7.359 | 2.621 | -0.3471 | -0.4159 | 0.2246  |
| 1IPP | C88  | 1588 | 2.715 | 7.285 | 2.894 | -0.3154 | -0.3995 | 0.2061  |
| 1IPP | C89  | 1589 | 2.554 | 7.101 | 3.063 | -0.2684 | -0.4261 | 0.2343  |
| 1IPP | C90  | 1590 | 2.692 | 6.852 | 3.148 | -0.2143 | -0.3979 | 0.2254  |
| 1IPP | C91  | 1591 | 2.673 | 6.622 | 2.960 | -0.1950 | -0.4088 | 0.2309  |
| 1IPP | C92  | 1592 | 2.895 | 6.597 | 2.765 | -0.2122 | -0.3734 | 0.2128  |
| 1IPP | C93  | 1593 | 2.897 | 6.786 | 2.537 | -0.2740 | -0.3850 | 0.2181  |
| 1IPP | C94  | 1594 | 2.796 | 6.718 | 2.266 | -0.2851 | -0.4101 | 0.2147  |
| 1IPP | C95  | 1595 | 2.985 | 6.564 | 2.096 | -0.2741 | -0.3816 | 0.2072  |
| 1IPP | C96  | 1596 | 3.263 | 6.655 | 2.038 | -0.2970 | -0.3460 | 0.1752  |
| 1IPP | C97  | 1597 | 3.466 | 6.439 | 2.011 | -0.2800 | -0.2926 | 0.1616  |
| 1IPP | C98  | 1598 | 3.562 | 6.273 | 2.239 | -0.2116 | -0.2821 | 0.1601  |
| 1IPP | C99  | 1599 | 3.777 | 6.373 | 2.417 | -0.2090 | -0.2499 | 0.1257  |
| 1IPP | C100 | 1600 | 4.053 | 6.337 | 2.312 | -0.2252 | -0.2065 | 0.0999  |
| 1IPP | C1   | 1601 | 4.866 | 8.672 | 3.084 | -0.5150 | -0.0573 | -0.0274 |

|      |     |      |       |       |       |         |         |         |
|------|-----|------|-------|-------|-------|---------|---------|---------|
| 1IPP | C2  | 1602 | 4.569 | 8.664 | 3.107 | -0.4974 | -0.1111 | 0.0044  |
| 1IPP | C3  | 1603 | 4.387 | 8.893 | 3.162 | -0.5292 | -0.1329 | 0.0064  |
| 1IPP | C4  | 1604 | 4.327 | 8.968 | 3.444 | -0.5110 | -0.1383 | 0.0157  |
| 1IPP | C5  | 1605 | 4.166 | 8.811 | 3.639 | -0.4854 | -0.1639 | 0.0437  |
| 1IPP | C6  | 1606 | 3.869 | 8.801 | 3.636 | -0.4631 | -0.2037 | 0.0617  |
| 1IPP | C7  | 1607 | 3.699 | 9.007 | 3.768 | -0.4842 | -0.2353 | 0.0782  |
| 1IPP | C8  | 1608 | 3.681 | 9.010 | 4.066 | -0.4686 | -0.2364 | 0.0836  |
| 1IPP | C9  | 1609 | 3.466 | 8.881 | 4.225 | -0.4210 | -0.2490 | 0.1070  |
| 1IPP | C10 | 1610 | 3.485 | 8.604 | 4.335 | -0.3627 | -0.2428 | 0.1143  |
| 1IPP | C11 | 1611 | 3.355 | 8.356 | 4.232 | -0.3490 | -0.2792 | 0.1239  |
| 1IPP | C12 | 1612 | 3.491 | 8.147 | 4.072 | -0.3288 | -0.2544 | 0.1069  |
| 1IPP | C13 | 1613 | 3.515 | 8.163 | 3.778 | -0.3497 | -0.2584 | 0.1189  |
| 1IPP | C14 | 1614 | 3.686 | 8.396 | 3.727 | -0.3978 | -0.2334 | 0.0929  |
| 1IPP | C15 | 1615 | 3.546 | 8.603 | 3.883 | -0.4170 | -0.2467 | 0.1079  |
| 1IPP | C16 | 1616 | 3.269 | 8.700 | 3.839 | -0.4301 | -0.2996 | 0.1241  |
| 1IPP | C17 | 1617 | 3.067 | 8.643 | 4.051 | -0.3983 | -0.3304 | 0.1460  |
| 1IPP | C18 | 1618 | 2.930 | 8.380 | 4.053 | -0.3732 | -0.3382 | 0.1670  |
| 1IPP | C19 | 1619 | 2.674 | 8.361 | 3.904 | -0.3634 | -0.3876 | 0.2055  |
| 1IPP | C20 | 1620 | 2.669 | 8.268 | 3.621 | -0.3869 | -0.3934 | 0.1901  |
| 1IPP | C21 | 1621 | 2.801 | 8.451 | 3.427 | -0.4399 | -0.3828 | 0.1846  |
| 1IPP | C22 | 1622 | 3.067 | 8.390 | 3.306 | -0.4422 | -0.3395 | 0.1569  |
| 1IPP | C23 | 1623 | 3.324 | 8.438 | 3.449 | -0.4306 | -0.2964 | 0.1363  |
| 1IPP | C24 | 1624 | 3.445 | 8.709 | 3.420 | -0.4775 | -0.2775 | 0.1144  |
| 1IPP | C25 | 1625 | 3.603 | 8.774 | 3.177 | -0.5113 | -0.2650 | 0.0969  |
| 1IPP | C26 | 1626 | 3.899 | 8.806 | 3.179 | -0.5119 | -0.2075 | 0.0636  |
| 1IPP | C27 | 1627 | 4.084 | 8.590 | 3.263 | -0.4720 | -0.1876 | 0.0506  |
| 1IPP | C28 | 1628 | 4.219 | 8.385 | 3.098 | -0.4635 | -0.1623 | 0.0358  |
| 1IPP | C29 | 1629 | 4.123 | 8.114 | 3.161 | -0.4128 | -0.1671 | 0.0483  |
| 1IPP | C30 | 1630 | 4.278 | 7.944 | 3.347 | -0.3671 | -0.1550 | 0.0475  |
| 1IPP | C31 | 1631 | 4.444 | 7.873 | 3.115 | -0.3874 | -0.1248 | 0.0302  |
| 1IPP | C32 | 1632 | 4.256 | 7.697 | 2.967 | -0.3579 | -0.1667 | 0.0555  |
| 1IPP | C33 | 1633 | 4.008 | 7.806 | 2.846 | -0.4026 | -0.1949 | 0.0748  |
| 1IPP | C34 | 1634 | 3.766 | 7.896 | 2.993 | -0.3862 | -0.2401 | 0.0920  |
| 1IPP | C35 | 1635 | 3.565 | 7.685 | 3.048 | -0.3633 | -0.2688 | 0.1273  |
| 1IPP | C36 | 1636 | 3.380 | 7.662 | 2.820 | -0.3738 | -0.3038 | 0.1402  |
| 1IPP | C37 | 1637 | 3.129 | 7.819 | 2.789 | -0.4089 | -0.3460 | 0.1646  |
| 1IPP | C38 | 1638 | 2.869 | 7.695 | 2.857 | -0.3779 | -0.3735 | 0.1883  |
| 1IPP | C39 | 1639 | 2.729 | 7.720 | 3.119 | -0.3499 | -0.3933 | 0.2019  |
| 1IPP | C40 | 1640 | 2.825 | 7.567 | 3.354 | -0.3064 | -0.3653 | 0.2053  |
| 1IPP | C41 | 1641 | 2.792 | 7.274 | 3.395 | -0.2504 | -0.3878 | 0.2048  |
| 1IPP | C42 | 1642 | 2.544 | 7.192 | 3.533 | -0.2400 | -0.4121 | 0.2390  |
| 1IPP | C43 | 1643 | 2.570 | 7.304 | 3.806 | -0.2233 | -0.4073 | 0.2275  |
| 1IPP | C44 | 1644 | 2.468 | 7.578 | 3.858 | -0.2655 | -0.4249 | 0.2361  |
| 1IPP | C45 | 1645 | 2.634 | 7.822 | 3.821 | -0.2939 | -0.3853 | 0.2130  |
| 1IPP | C46 | 1646 | 2.803 | 7.927 | 4.042 | -0.2969 | -0.3653 | 0.1888  |
| 1IPP | C47 | 1647 | 3.088 | 7.948 | 3.962 | -0.3039 | -0.3236 | 0.1586  |
| 1IPP | C48 | 1648 | 3.078 | 8.108 | 3.712 | -0.3555 | -0.3298 | 0.1696  |
| 1IPP | C49 | 1649 | 2.987 | 7.976 | 3.460 | -0.3604 | -0.3497 | 0.1808  |
| 1IPP | C50 | 1650 | 3.180 | 7.861 | 3.266 | -0.3653 | -0.3305 | 0.1476  |
| 1IPP | C51 | 1651 | 3.355 | 8.071 | 3.150 | -0.4050 | -0.2904 | 0.1191  |
| 1IPP | C52 | 1652 | 3.310 | 8.200 | 2.886 | -0.4459 | -0.3231 | 0.1388  |
| 1IPP | C53 | 1653 | 3.497 | 8.146 | 2.660 | -0.4650 | -0.2817 | 0.1274  |
| 1IPP | C54 | 1654 | 3.501 | 7.918 | 2.467 | -0.4501 | -0.2865 | 0.1179  |
| 1IPP | C55 | 1655 | 3.727 | 7.726 | 2.500 | -0.4198 | -0.2621 | 0.0970  |
| 1IPP | C56 | 1656 | 3.982 | 7.847 | 2.404 | -0.4348 | -0.2138 | 0.0790  |
| 1IPP | C57 | 1657 | 4.089 | 7.822 | 2.128 | -0.4705 | -0.2115 | 0.0618  |
| 1IPP | C58 | 1658 | 4.278 | 7.603 | 2.057 | -0.4525 | -0.1762 | 0.0542  |
| 1IPP | C59 | 1659 | 4.572 | 7.644 | 2.026 | -0.4507 | -0.1421 | 0.0133  |
| 1IPP | C60 | 1660 | 4.754 | 7.647 | 2.261 | -0.4252 | -0.0999 | 0.0052  |
| 1IPP | C61 | 1661 | 4.849 | 7.909 | 2.366 | -0.4629 | -0.0886 | -0.0131 |
| 1IPP | C62 | 1662 | 5.124 | 7.915 | 2.480 | -0.4534 | -0.0371 | -0.0495 |
| 1IPP | C63 | 1663 | 5.147 | 7.864 | 2.772 | -0.4111 | -0.0387 | -0.0403 |
| 1IPP | C64 | 1664 | 5.108 | 8.101 | 2.947 | -0.4305 | -0.0224 | -0.0390 |
| 1IPP | C65 | 1665 | 4.821 | 8.159 | 2.991 | -0.4382 | -0.0773 | -0.0207 |
| 1IPP | C66 | 1666 | 4.674 | 8.342 | 2.809 | -0.4839 | -0.1129 | -0.0098 |
| 1IPP | C67 | 1667 | 4.513 | 8.220 | 2.593 | -0.4918 | -0.1291 | 0.0199  |
| 1IPP | C68 | 1668 | 4.252 | 8.133 | 2.704 | -0.4541 | -0.1675 | 0.0386  |
| 1IPP | C69 | 1669 | 3.987 | 8.255 | 2.645 | -0.4797 | -0.2057 | 0.0663  |
| 1IPP | C70 | 1670 | 3.877 | 8.464 | 2.825 | -0.4951 | -0.2272 | 0.0688  |
| 1IPP | C71 | 1671 | 3.692 | 8.361 | 3.032 | -0.4646 | -0.2467 | 0.0938  |
| 1IPP | C72 | 1672 | 3.735 | 8.290 | 3.316 | -0.4336 | -0.2208 | 0.0902  |
| 1IPP | C73 | 1673 | 3.786 | 8.020 | 3.433 | -0.3666 | -0.2263 | 0.0938  |
| 1IPP | C74 | 1674 | 3.585 | 7.804 | 3.465 | -0.3378 | -0.2588 | 0.1160  |

|      |      |      |       |       |       |         |         |         |
|------|------|------|-------|-------|-------|---------|---------|---------|
| 1IPP | C75  | 1675 | 3.376 | 7.762 | 3.672 | -0.3036 | -0.2808 | 0.1380  |
| 1IPP | C76  | 1676 | 3.445 | 7.606 | 3.914 | -0.2622 | -0.2780 | 0.1310  |
| 1IPP | C77  | 1677 | 3.568 | 7.720 | 4.158 | -0.2490 | -0.2397 | 0.1351  |
| 1IPP | C78  | 1678 | 3.838 | 7.845 | 4.137 | -0.2724 | -0.1987 | 0.0906  |
| 1IPP | C79  | 1679 | 3.912 | 8.106 | 4.260 | -0.3057 | -0.1790 | 0.0711  |
| 1IPP | C80  | 1680 | 3.863 | 8.383 | 4.165 | -0.3536 | -0.2043 | 0.0807  |
| 1IPP | C81  | 1681 | 4.038 | 8.506 | 3.958 | -0.3911 | -0.1673 | 0.0506  |
| 1IPP | C82  | 1682 | 4.335 | 8.521 | 3.958 | -0.3891 | -0.1345 | 0.0226  |
| 1IPP | C83  | 1683 | 4.497 | 8.752 | 4.051 | -0.4189 | -0.0910 | 0.0008  |
| 1IPP | C84  | 1684 | 4.534 | 8.970 | 3.854 | -0.4769 | -0.1132 | -0.0086 |
| 1IPP | C85  | 1685 | 4.376 | 9.221 | 3.858 | -0.5123 | -0.1166 | 0.0125  |
| 1IPP | C86  | 1686 | 4.082 | 9.238 | 3.821 | -0.5249 | -0.1685 | 0.0248  |
| 1IPP | C87  | 1687 | 4.006 | 9.258 | 3.535 | -0.5575 | -0.1923 | 0.0424  |
| 1IPP | C88  | 1688 | 4.188 | 9.473 | 3.439 | -0.5934 | -0.1540 | 0.0248  |
| 1IPP | C89  | 1689 | 4.448 | 9.397 | 3.313 | -0.5943 | -0.1237 | -0.0097 |
| 1IPP | C90  | 1690 | 4.685 | 9.289 | 3.458 | -0.5643 | -0.0815 | -0.0310 |
| 1IPP | C91  | 1691 | 4.770 | 9.018 | 3.371 | -0.5391 | -0.0656 | -0.0286 |
| 1IPP | C92  | 1692 | 4.728 | 8.762 | 3.517 | -0.4870 | -0.0709 | -0.0155 |
| 1IPP | C93  | 1693 | 4.966 | 8.592 | 3.560 | -0.4494 | -0.0363 | -0.0401 |
| 1IPP | C94  | 1694 | 5.033 | 8.361 | 3.386 | -0.4261 | -0.0315 | -0.0374 |
| 1IPP | C95  | 1695 | 4.848 | 8.137 | 3.446 | -0.3760 | -0.0587 | -0.0161 |
| 1IPP | C96  | 1696 | 4.594 | 8.264 | 3.355 | -0.4295 | -0.0971 | 0.0123  |
| 1IPP | C97  | 1697 | 4.405 | 8.405 | 3.534 | -0.4179 | -0.1198 | 0.0128  |
| 1IPP | C98  | 1698 | 4.136 | 8.288 | 3.591 | -0.3951 | -0.1648 | 0.0411  |
| 1IPP | C99  | 1699 | 4.062 | 8.083 | 3.795 | -0.3436 | -0.1703 | 0.0588  |
| 1IPP | C100 | 1700 | 4.055 | 7.792 | 3.729 | -0.2997 | -0.1770 | 0.0711  |
| 1IPP | C1   | 1701 | 5.202 | 7.062 | 4.280 | -0.1366 | 0.0134  | -0.0350 |
| 1IPP | C2   | 1702 | 5.151 | 6.909 | 4.529 | -0.0859 | 0.0327  | -0.0127 |
| 1IPP | C3   | 1703 | 5.155 | 6.621 | 4.462 | -0.0550 | 0.0028  | -0.0147 |
| 1IPP | C4   | 1704 | 5.368 | 6.519 | 4.284 | -0.0460 | 0.0381  | -0.0303 |
| 1IPP | C5   | 1705 | 5.295 | 6.593 | 4.006 | -0.0938 | 0.0245  | -0.0309 |
| 1IPP | C6   | 1706 | 5.193 | 6.407 | 3.800 | -0.0818 | 0.0099  | -0.0165 |
| 1IPP | C7   | 1707 | 5.431 | 6.293 | 3.666 | -0.0809 | 0.0388  | -0.0353 |
| 1IPP | C8   | 1708 | 5.545 | 6.521 | 3.515 | -0.1179 | 0.0535  | -0.0526 |
| 1IPP | C9   | 1709 | 5.391 | 6.575 | 3.267 | -0.1622 | 0.0249  | -0.0265 |
| 1IPP | C10  | 1710 | 5.497 | 6.488 | 3.004 | -0.1606 | 0.0419  | -0.0547 |
| 1IPP | C11  | 1711 | 5.675 | 6.714 | 2.934 | -0.2219 | 0.0584  | -0.0694 |
| 1IPP | C12  | 1712 | 5.500 | 6.954 | 2.937 | -0.2472 | 0.0282  | -0.0586 |
| 1IPP | C13  | 1713 | 5.354 | 7.024 | 2.688 | -0.2909 | -0.0060 | -0.0408 |
| 1IPP | C14  | 1714 | 5.454 | 7.239 | 2.507 | -0.3440 | 0.0254  | -0.0676 |
| 1IPP | C15  | 1715 | 5.372 | 7.514 | 2.584 | -0.3748 | 0.0041  | -0.0541 |
| 1IPP | C16  | 1716 | 5.562 | 7.648 | 2.770 | -0.3790 | 0.0426  | -0.0761 |
| 1IPP | C17  | 1717 | 5.697 | 7.458 | 2.955 | -0.3300 | 0.0675  | -0.0869 |
| 1IPP | C18  | 1718 | 5.541 | 7.337 | 3.175 | -0.2865 | 0.0410  | -0.0743 |
| 1IPP | C19  | 1719 | 5.476 | 7.450 | 3.442 | -0.2804 | 0.0416  | -0.0704 |
| 1IPP | C20  | 1720 | 5.672 | 7.399 | 3.658 | -0.2460 | 0.0828  | -0.0888 |
| 1IPP | C21  | 1721 | 5.785 | 7.127 | 3.693 | -0.2050 | 0.0853  | -0.0888 |
| 1IPP | C22  | 1722 | 5.652 | 6.881 | 3.791 | -0.1546 | 0.0835  | -0.0816 |
| 1IPP | C23  | 1723 | 5.698 | 6.757 | 4.057 | -0.0998 | 0.0840  | -0.0628 |
| 1IPP | C24  | 1724 | 5.884 | 6.530 | 4.099 | -0.0710 | 0.1331  | -0.0881 |
| 1IPP | C25  | 1725 | 5.771 | 6.287 | 3.972 | -0.0363 | 0.0915  | -0.0811 |
| 1IPP | C26  | 1726 | 5.555 | 6.145 | 4.120 | -0.0103 | 0.0628  | -0.0341 |
| 1IPP | C27  | 1727 | 5.608 | 5.891 | 4.264 | 0.0479  | 0.0741  | -0.0482 |
| 1IPP | C28  | 1728 | 5.537 | 5.625 | 4.154 | 0.0793  | 0.0676  | -0.0219 |
| 1IPP | C29  | 1729 | 5.272 | 5.491 | 4.133 | 0.1006  | 0.0225  | 0.0041  |
| 1IPP | C30  | 1730 | 5.173 | 5.314 | 4.352 | 0.1421  | 0.0138  | 0.0095  |
| 1IPP | C31  | 1731 | 5.221 | 5.024 | 4.317 | 0.1885  | 0.0184  | 0.0190  |
| 1IPP | C32  | 1732 | 5.502 | 4.940 | 4.362 | 0.2112  | 0.0645  | -0.0111 |
| 1IPP | C33  | 1733 | 5.686 | 4.947 | 4.131 | 0.1742  | 0.0909  | -0.0252 |
| 1IPP | C34  | 1734 | 5.746 | 5.228 | 4.058 | 0.1235  | 0.1007  | -0.0428 |
| 1IPP | C35  | 1735 | 5.640 | 5.367 | 3.817 | 0.0882  | 0.0673  | -0.0345 |
| 1IPP | C36  | 1736 | 5.830 | 5.348 | 3.589 | 0.0670  | 0.0989  | -0.0526 |
| 1IPP | C37  | 1737 | 6.088 | 5.498 | 3.583 | 0.0394  | 0.1432  | -0.0788 |
| 1IPP | C38  | 1738 | 6.135 | 5.748 | 3.429 | -0.0182 | 0.1361  | -0.0904 |
| 1IPP | C39  | 1739 | 6.116 | 6.023 | 3.541 | -0.0564 | 0.1436  | -0.1041 |
| 1IPP | C40  | 1740 | 5.850 | 6.153 | 3.528 | -0.0610 | 0.1003  | -0.0766 |
| 1IPP | C41  | 1741 | 5.820 | 6.281 | 3.262 | -0.1017 | 0.0944  | -0.0753 |
| 1IPP | C42  | 1742 | 6.009 | 6.509 | 3.267 | -0.1585 | 0.1104  | -0.0964 |
| 1IPP | C43  | 1743 | 5.948 | 6.748 | 3.433 | -0.1759 | 0.1084  | -0.0915 |
| 1IPP | C44  | 1744 | 5.800 | 6.963 | 3.293 | -0.2138 | 0.0845  | -0.0887 |
| 1IPP | C45  | 1745 | 5.979 | 7.043 | 3.072 | -0.2519 | 0.1026  | -0.1100 |
| 1IPP | C46  | 1746 | 6.257 | 7.073 | 3.173 | -0.2484 | 0.1517  | -0.1443 |
| 1IPP | C47  | 1747 | 6.452 | 6.848 | 3.197 | -0.2109 | 0.1890  | -0.1446 |

|          |          |          |       |       |       |         |         |         |
|----------|----------|----------|-------|-------|-------|---------|---------|---------|
| 1IPP     | C48      | 1748     | 6.536 | 6.694 | 3.439 | -0.1601 | 0.2071  | -0.1605 |
| 1IPP     | C49      | 1749     | 6.418 | 6.433 | 3.520 | -0.1141 | 0.1866  | -0.1403 |
| 1IPP     | C50      | 1750     | 6.197 | 6.438 | 3.718 | -0.0958 | 0.1573  | -0.1115 |
| 1IPP     | C51      | 1751     | 6.296 | 6.419 | 3.997 | -0.0674 | 0.1849  | -0.1302 |
| 1IPP     | C52      | 1752     | 6.339 | 6.161 | 4.137 | -0.0076 | 0.1845  | -0.1149 |
| 1IPP     | C53      | 1753     | 6.087 | 6.020 | 4.204 | 0.0259  | 0.1493  | -0.1005 |
| 1IPP     | C54      | 1754     | 5.947 | 6.169 | 4.418 | 0.0249  | 0.1404  | -0.0902 |
| 1IPP     | C55      | 1755     | 5.800 | 6.068 | 4.655 | 0.0552  | 0.1175  | -0.0594 |
| 1IPP     | C56      | 1756     | 5.509 | 6.123 | 4.640 | 0.0507  | 0.0743  | -0.0380 |
| 1IPP     | C57      | 1757     | 5.372 | 6.357 | 4.765 | 0.0176  | 0.0544  | -0.0294 |
| 1IPP     | C58      | 1758     | 5.210 | 6.337 | 5.014 | 0.0528  | 0.0341  | -0.0206 |
| 1IPP     | C59      | 1759     | 4.916 | 6.381 | 5.017 | 0.0372  | -0.0079 | 0.0148  |
| 1IPP     | C60      | 1760     | 4.793 | 6.648 | 5.060 | 0.0086  | -0.0312 | 0.0197  |
| 1IPP     | C61      | 1761     | 4.852 | 6.885 | 4.893 | -0.0554 | -0.0235 | 0.0031  |
| 1IPP     | C62      | 1762     | 4.634 | 6.844 | 4.699 | -0.0529 | -0.0608 | 0.0300  |
| 1IPP     | C63      | 1763     | 4.721 | 6.703 | 4.455 | -0.0545 | -0.0509 | 0.0317  |
| 1IPP     | C64      | 1764     | 4.702 | 6.412 | 4.511 | -0.0105 | -0.0505 | 0.0230  |
| 1IPP     | C65      | 1765     | 4.949 | 6.270 | 4.598 | 0.0319  | -0.0205 | 0.0176  |
| 1IPP     | C66      | 1766     | 5.144 | 6.145 | 4.411 | 0.0241  | 0.0080  | -0.0015 |
| 1IPP     | C67      | 1767     | 5.177 | 5.853 | 4.371 | 0.0609  | 0.0142  | 0.0044  |
| 1IPP     | C68      | 1768     | 5.314 | 5.682 | 4.575 | 0.1203  | 0.0293  | -0.0072 |
| 1IPP     | C69      | 1769     | 5.604 | 5.652 | 4.639 | 0.1165  | 0.0871  | -0.0339 |
| 1IPP     | C70      | 1770     | 5.791 | 5.466 | 4.500 | 0.1390  | 0.1079  | -0.0522 |
| 1IPP     | C71      | 1771     | 5.990 | 5.576 | 4.307 | 0.1036  | 0.1351  | -0.0741 |
| 1IPP     | C72      | 1772     | 5.977 | 5.600 | 4.012 | 0.0771  | 0.1313  | -0.0739 |
| 1IPP     | C73      | 1773     | 5.869 | 5.833 | 3.865 | 0.0056  | 0.1072  | -0.0615 |
| 1IPP     | C74      | 1774     | 5.585 | 5.855 | 3.780 | 0.0078  | 0.0630  | -0.0488 |
| 1IPP     | C75      | 1775     | 5.509 | 5.731 | 3.523 | -0.0025 | 0.0500  | -0.0256 |
| 1IPP     | C76      | 1776     | 5.528 | 5.896 | 3.279 | -0.0536 | 0.0423  | -0.0347 |
| 1IPP     | C77      | 1777     | 5.338 | 6.122 | 3.243 | -0.0854 | 0.0098  | -0.0140 |
| 1IPP     | C78      | 1778     | 5.044 | 6.099 | 3.198 | -0.1065 | -0.0407 | 0.0121  |
| 1IPP     | C79      | 1779     | 4.906 | 6.322 | 3.337 | -0.1100 | -0.0585 | 0.0140  |
| 1IPP     | C80      | 1780     | 4.784 | 6.334 | 3.608 | -0.0880 | -0.0679 | 0.0302  |
| 1IPP     | C81      | 1781     | 4.497 | 6.404 | 3.647 | -0.0891 | -0.1070 | 0.0516  |
| 1IPP     | C82      | 1782     | 4.420 | 6.676 | 3.552 | -0.1483 | -0.1325 | 0.0639  |
| 1IPP     | C83      | 1783     | 4.540 | 6.919 | 3.669 | -0.1761 | -0.0990 | 0.0424  |
| 1IPP     | C84      | 1784     | 4.761 | 6.930 | 3.471 | -0.1810 | -0.0780 | 0.0115  |
| 1IPP     | C85      | 1785     | 4.982 | 6.733 | 3.489 | -0.1609 | -0.0231 | -0.0002 |
| 1IPP     | C86      | 1786     | 5.232 | 6.823 | 3.619 | -0.1621 | 0.0073  | -0.0345 |
| 1IPP     | C87      | 1787     | 5.373 | 7.001 | 3.432 | -0.2111 | 0.0253  | -0.0414 |
| 1IPP     | C88      | 1788     | 5.143 | 7.169 | 3.355 | -0.2468 | -0.0099 | -0.0277 |
| 1IPP     | C89      | 1789     | 5.027 | 7.368 | 3.540 | -0.2560 | -0.0301 | -0.0147 |
| 1IPP     | C90      | 1790     | 4.802 | 7.290 | 3.720 | -0.2237 | -0.0590 | 0.0143  |
| 1IPP     | C91      | 1791     | 4.869 | 7.150 | 3.974 | -0.1824 | -0.0361 | -0.0096 |
| 1IPP     | C92      | 1792     | 4.935 | 6.863 | 3.936 | -0.1364 | -0.0373 | 0.0059  |
| 1IPP     | C93      | 1793     | 4.755 | 6.629 | 3.961 | -0.0969 | -0.0659 | 0.0263  |
| 1IPP     | C94      | 1794     | 4.858 | 6.398 | 4.117 | -0.0489 | -0.0368 | 0.0230  |
| 1IPP     | C95      | 1795     | 4.892 | 6.112 | 4.043 | -0.0189 | -0.0343 | 0.0161  |
| 1IPP     | C96      | 1796     | 5.141 | 5.989 | 3.936 | 0.0020  | -0.0104 | 0.0045  |
| 1IPP     | C97      | 1797     | 5.132 | 5.958 | 3.641 | -0.0187 | -0.0074 | 0.0012  |
| 1IPP     | C98      | 1798     | 5.003 | 5.700 | 3.575 | 0.0032  | -0.0268 | 0.0088  |
| 1IPP     | C99      | 1799     | 5.153 | 5.458 | 3.664 | 0.0585  | -0.0174 | 0.0152  |
| 1IPP     | C100     | 1800     | 5.332 | 5.313 | 3.476 | 0.0580  | 0.0173  | -0.0009 |
| 10.00000 | 10.00000 | 10.00000 |       |       |       |         |         |         |

## 2.2 Polypropylene NP System Topology

```
#include "martini_v2.0_PEO_PS_CNP.itp"
#include "PP100.itp"
```

```
[ system ]
; name
POLYPROPYLENE
```

```
[ molecules ]
; name          number
IPP             18
```

## 2.3 Polypropylene NP Topology

```
[moleculetype]
; molname      nrexcl
IPP           2
```

```
[atoms]
; id type      resnr residu atom  cgnr charge
1  SC1         1      IPP  C1     1    0
2  SC1         1      IPP  C2     2    0
3  SC1         1      IPP  C3     3    0
4  SC1         1      IPP  C4     4    0
5  SC1         1      IPP  C5     5    0
6  SC1         1      IPP  C6     6    0
7  SC1         1      IPP  C7     7    0
8  SC1         1      IPP  C8     8    0
9  SC1         1      IPP  C9     9    0
10 SC1         1      IPP  C10    10   0
11 SC1         1      IPP  C11    11   0
12 SC1         1      IPP  C12    12   0
13 SC1         1      IPP  C13    13   0
14 SC1         1      IPP  C14    14   0
15 SC1         1      IPP  C15    15   0
16 SC1         1      IPP  C16    16   0
17 SC1         1      IPP  C17    17   0
18 SC1         1      IPP  C18    18   0
19 SC1         1      IPP  C19    19   0
20 SC1         1      IPP  C20    20   0
21 SC1         1      IPP  C21    21   0
22 SC1         1      IPP  C22    22   0
23 SC1         1      IPP  C23    23   0
24 SC1         1      IPP  C24    24   0
25 SC1         1      IPP  C25    25   0
26 SC1         1      IPP  C26    26   0
27 SC1         1      IPP  C27    27   0
28 SC1         1      IPP  C28    28   0
29 SC1         1      IPP  C29    29   0
30 SC1         1      IPP  C30    30   0
31 SC1         1      IPP  C31    31   0
32 SC1         1      IPP  C32    32   0
33 SC1         1      IPP  C33    33   0
34 SC1         1      IPP  C34    34   0
35 SC1         1      IPP  C35    35   0
36 SC1         1      IPP  C36    36   0
37 SC1         1      IPP  C37    37   0
38 SC1         1      IPP  C38    38   0
39 SC1         1      IPP  C39    39   0
40 SC1         1      IPP  C40    40   0
41 SC1         1      IPP  C41    41   0
42 SC1         1      IPP  C42    42   0
43 SC1         1      IPP  C43    43   0
44 SC1         1      IPP  C44    44   0
45 SC1         1      IPP  C45    45   0
46 SC1         1      IPP  C46    46   0
47 SC1         1      IPP  C47    47   0
48 SC1         1      IPP  C48    48   0
49 SC1         1      IPP  C49    49   0
50 SC1         1      IPP  C50    50   0
51 SC1         1      IPP  C51    51   0
```

|     |     |   |     |      |     |   |
|-----|-----|---|-----|------|-----|---|
| 52  | SC1 | 1 | IPP | C52  | 52  | 0 |
| 53  | SC1 | 1 | IPP | C53  | 53  | 0 |
| 54  | SC1 | 1 | IPP | C54  | 54  | 0 |
| 55  | SC1 | 1 | IPP | C55  | 55  | 0 |
| 56  | SC1 | 1 | IPP | C56  | 56  | 0 |
| 57  | SC1 | 1 | IPP | C57  | 57  | 0 |
| 58  | SC1 | 1 | IPP | C58  | 58  | 0 |
| 59  | SC1 | 1 | IPP | C59  | 59  | 0 |
| 60  | SC1 | 1 | IPP | C60  | 60  | 0 |
| 61  | SC1 | 1 | IPP | C61  | 61  | 0 |
| 62  | SC1 | 1 | IPP | C62  | 62  | 0 |
| 63  | SC1 | 1 | IPP | C63  | 63  | 0 |
| 64  | SC1 | 1 | IPP | C64  | 64  | 0 |
| 65  | SC1 | 1 | IPP | C65  | 65  | 0 |
| 66  | SC1 | 1 | IPP | C66  | 66  | 0 |
| 67  | SC1 | 1 | IPP | C67  | 67  | 0 |
| 68  | SC1 | 1 | IPP | C68  | 68  | 0 |
| 69  | SC1 | 1 | IPP | C69  | 69  | 0 |
| 70  | SC1 | 1 | IPP | C70  | 70  | 0 |
| 71  | SC1 | 1 | IPP | C71  | 71  | 0 |
| 72  | SC1 | 1 | IPP | C72  | 72  | 0 |
| 73  | SC1 | 1 | IPP | C73  | 73  | 0 |
| 74  | SC1 | 1 | IPP | C74  | 74  | 0 |
| 75  | SC1 | 1 | IPP | C75  | 75  | 0 |
| 76  | SC1 | 1 | IPP | C76  | 76  | 0 |
| 77  | SC1 | 1 | IPP | C77  | 77  | 0 |
| 78  | SC1 | 1 | IPP | C78  | 78  | 0 |
| 79  | SC1 | 1 | IPP | C79  | 79  | 0 |
| 80  | SC1 | 1 | IPP | C80  | 80  | 0 |
| 81  | SC1 | 1 | IPP | C81  | 81  | 0 |
| 82  | SC1 | 1 | IPP | C82  | 82  | 0 |
| 83  | SC1 | 1 | IPP | C83  | 83  | 0 |
| 84  | SC1 | 1 | IPP | C84  | 84  | 0 |
| 85  | SC1 | 1 | IPP | C85  | 85  | 0 |
| 86  | SC1 | 1 | IPP | C86  | 86  | 0 |
| 87  | SC1 | 1 | IPP | C87  | 87  | 0 |
| 88  | SC1 | 1 | IPP | C88  | 88  | 0 |
| 89  | SC1 | 1 | IPP | C89  | 89  | 0 |
| 90  | SC1 | 1 | IPP | C90  | 90  | 0 |
| 91  | SC1 | 1 | IPP | C91  | 91  | 0 |
| 92  | SC1 | 1 | IPP | C92  | 92  | 0 |
| 93  | SC1 | 1 | IPP | C93  | 93  | 0 |
| 94  | SC1 | 1 | IPP | C94  | 94  | 0 |
| 95  | SC1 | 1 | IPP | C95  | 95  | 0 |
| 96  | SC1 | 1 | IPP | C96  | 96  | 0 |
| 97  | SC1 | 1 | IPP | C97  | 97  | 0 |
| 98  | SC1 | 1 | IPP | C98  | 98  | 0 |
| 99  | SC1 | 1 | IPP | C99  | 99  | 0 |
| 100 | SC1 | 1 | IPP | C100 | 100 | 0 |

[bonds]

| ; i | j  | funct | length | force.c. |
|-----|----|-------|--------|----------|
| 1   | 2  | 1     | 0.298  | 48000    |
| 2   | 3  | 1     | 0.298  | 48000    |
| 3   | 4  | 1     | 0.298  | 48000    |
| 4   | 5  | 1     | 0.298  | 48000    |
| 5   | 6  | 1     | 0.298  | 48000    |
| 6   | 7  | 1     | 0.298  | 48000    |
| 7   | 8  | 1     | 0.298  | 48000    |
| 8   | 9  | 1     | 0.298  | 48000    |
| 9   | 10 | 1     | 0.298  | 48000    |
| 10  | 11 | 1     | 0.298  | 48000    |
| 11  | 12 | 1     | 0.298  | 48000    |
| 12  | 13 | 1     | 0.298  | 48000    |
| 13  | 14 | 1     | 0.298  | 48000    |
| 14  | 15 | 1     | 0.298  | 48000    |
| 15  | 16 | 1     | 0.298  | 48000    |
| 16  | 17 | 1     | 0.298  | 48000    |
| 17  | 18 | 1     | 0.298  | 48000    |
| 18  | 19 | 1     | 0.298  | 48000    |
| 19  | 20 | 1     | 0.298  | 48000    |
| 20  | 21 | 1     | 0.298  | 48000    |
| 21  | 22 | 1     | 0.298  | 48000    |

|    |    |   |       |       |
|----|----|---|-------|-------|
| 22 | 23 | 1 | 0.298 | 48000 |
| 23 | 24 | 1 | 0.298 | 48000 |
| 24 | 25 | 1 | 0.298 | 48000 |
| 25 | 26 | 1 | 0.298 | 48000 |
| 26 | 27 | 1 | 0.298 | 48000 |
| 27 | 28 | 1 | 0.298 | 48000 |
| 28 | 29 | 1 | 0.298 | 48000 |
| 29 | 30 | 1 | 0.298 | 48000 |
| 30 | 31 | 1 | 0.298 | 48000 |
| 31 | 32 | 1 | 0.298 | 48000 |
| 32 | 33 | 1 | 0.298 | 48000 |
| 33 | 34 | 1 | 0.298 | 48000 |
| 34 | 35 | 1 | 0.298 | 48000 |
| 35 | 36 | 1 | 0.298 | 48000 |
| 36 | 37 | 1 | 0.298 | 48000 |
| 37 | 38 | 1 | 0.298 | 48000 |
| 38 | 39 | 1 | 0.298 | 48000 |
| 39 | 40 | 1 | 0.298 | 48000 |
| 40 | 41 | 1 | 0.298 | 48000 |
| 41 | 42 | 1 | 0.298 | 48000 |
| 42 | 43 | 1 | 0.298 | 48000 |
| 43 | 44 | 1 | 0.298 | 48000 |
| 44 | 45 | 1 | 0.298 | 48000 |
| 45 | 46 | 1 | 0.298 | 48000 |
| 46 | 47 | 1 | 0.298 | 48000 |
| 47 | 48 | 1 | 0.298 | 48000 |
| 48 | 49 | 1 | 0.298 | 48000 |
| 49 | 50 | 1 | 0.298 | 48000 |
| 50 | 51 | 1 | 0.298 | 48000 |
| 51 | 52 | 1 | 0.298 | 48000 |
| 52 | 53 | 1 | 0.298 | 48000 |
| 53 | 54 | 1 | 0.298 | 48000 |
| 54 | 55 | 1 | 0.298 | 48000 |
| 55 | 56 | 1 | 0.298 | 48000 |
| 56 | 57 | 1 | 0.298 | 48000 |
| 57 | 58 | 1 | 0.298 | 48000 |
| 58 | 59 | 1 | 0.298 | 48000 |
| 59 | 60 | 1 | 0.298 | 48000 |
| 60 | 61 | 1 | 0.298 | 48000 |
| 61 | 62 | 1 | 0.298 | 48000 |
| 62 | 63 | 1 | 0.298 | 48000 |
| 63 | 64 | 1 | 0.298 | 48000 |
| 64 | 65 | 1 | 0.298 | 48000 |
| 65 | 66 | 1 | 0.298 | 48000 |
| 66 | 67 | 1 | 0.298 | 48000 |
| 67 | 68 | 1 | 0.298 | 48000 |
| 68 | 69 | 1 | 0.298 | 48000 |
| 69 | 70 | 1 | 0.298 | 48000 |
| 70 | 71 | 1 | 0.298 | 48000 |
| 71 | 72 | 1 | 0.298 | 48000 |
| 72 | 73 | 1 | 0.298 | 48000 |
| 73 | 74 | 1 | 0.298 | 48000 |
| 74 | 75 | 1 | 0.298 | 48000 |
| 75 | 76 | 1 | 0.298 | 48000 |
| 76 | 77 | 1 | 0.298 | 48000 |
| 77 | 78 | 1 | 0.298 | 48000 |
| 78 | 79 | 1 | 0.298 | 48000 |
| 79 | 80 | 1 | 0.298 | 48000 |
| 80 | 81 | 1 | 0.298 | 48000 |
| 81 | 82 | 1 | 0.298 | 48000 |
| 82 | 83 | 1 | 0.298 | 48000 |
| 83 | 84 | 1 | 0.298 | 48000 |
| 84 | 85 | 1 | 0.298 | 48000 |
| 85 | 86 | 1 | 0.298 | 48000 |
| 86 | 87 | 1 | 0.298 | 48000 |
| 87 | 88 | 1 | 0.298 | 48000 |
| 88 | 89 | 1 | 0.298 | 48000 |
| 89 | 90 | 1 | 0.298 | 48000 |
| 90 | 91 | 1 | 0.298 | 48000 |
| 91 | 92 | 1 | 0.298 | 48000 |
| 92 | 93 | 1 | 0.298 | 48000 |
| 93 | 94 | 1 | 0.298 | 48000 |
| 94 | 95 | 1 | 0.298 | 48000 |



|    |     |   |       |       |
|----|-----|---|-------|-------|
| 95 | 96  | 1 | 0.298 | 48000 |
| 96 | 97  | 1 | 0.298 | 48000 |
| 97 | 98  | 1 | 0.298 | 48000 |
| 98 | 99  | 1 | 0.298 | 48000 |
| 99 | 100 | 1 | 0.298 | 48000 |

[angles]

| ; i | j  | k  | funct | angle | force.c. |
|-----|----|----|-------|-------|----------|
| 1   | 2  | 3  | 10    | 119   | 78       |
| 2   | 3  | 4  | 10    | 119   | 78       |
| 3   | 4  | 5  | 10    | 119   | 78       |
| 4   | 5  | 6  | 10    | 119   | 78       |
| 5   | 6  | 7  | 10    | 119   | 78       |
| 6   | 7  | 8  | 10    | 119   | 78       |
| 7   | 8  | 9  | 10    | 119   | 78       |
| 8   | 9  | 10 | 10    | 119   | 78       |
| 9   | 10 | 11 | 10    | 119   | 78       |
| 10  | 11 | 12 | 10    | 119   | 78       |
| 11  | 12 | 13 | 10    | 119   | 78       |
| 12  | 13 | 14 | 10    | 119   | 78       |
| 13  | 14 | 15 | 10    | 119   | 78       |
| 14  | 15 | 16 | 10    | 119   | 78       |
| 15  | 16 | 17 | 10    | 119   | 78       |
| 16  | 17 | 18 | 10    | 119   | 78       |
| 17  | 18 | 19 | 10    | 119   | 78       |
| 18  | 19 | 20 | 10    | 119   | 78       |
| 19  | 20 | 21 | 10    | 119   | 78       |
| 20  | 21 | 22 | 10    | 119   | 78       |
| 21  | 22 | 23 | 10    | 119   | 78       |
| 22  | 23 | 24 | 10    | 119   | 78       |
| 23  | 24 | 25 | 10    | 119   | 78       |
| 24  | 25 | 26 | 10    | 119   | 78       |
| 25  | 26 | 27 | 10    | 119   | 78       |
| 26  | 27 | 28 | 10    | 119   | 78       |
| 27  | 28 | 29 | 10    | 119   | 78       |
| 28  | 29 | 30 | 10    | 119   | 78       |
| 29  | 30 | 31 | 10    | 119   | 78       |
| 30  | 31 | 32 | 10    | 119   | 78       |
| 31  | 32 | 33 | 10    | 119   | 78       |
| 32  | 33 | 34 | 10    | 119   | 78       |
| 33  | 34 | 35 | 10    | 119   | 78       |
| 34  | 35 | 36 | 10    | 119   | 78       |
| 35  | 36 | 37 | 10    | 119   | 78       |
| 36  | 37 | 38 | 10    | 119   | 78       |
| 37  | 38 | 39 | 10    | 119   | 78       |
| 38  | 39 | 40 | 10    | 119   | 78       |
| 39  | 40 | 41 | 10    | 119   | 78       |
| 40  | 41 | 42 | 10    | 119   | 78       |
| 41  | 42 | 43 | 10    | 119   | 78       |
| 42  | 43 | 44 | 10    | 119   | 78       |
| 43  | 44 | 45 | 10    | 119   | 78       |
| 44  | 45 | 46 | 10    | 119   | 78       |
| 45  | 46 | 47 | 10    | 119   | 78       |
| 46  | 47 | 48 | 10    | 119   | 78       |
| 47  | 48 | 49 | 10    | 119   | 78       |
| 48  | 49 | 50 | 10    | 119   | 78       |
| 49  | 50 | 51 | 10    | 119   | 78       |
| 50  | 51 | 52 | 10    | 119   | 78       |
| 51  | 52 | 53 | 10    | 119   | 78       |
| 52  | 53 | 54 | 10    | 119   | 78       |
| 53  | 54 | 55 | 10    | 119   | 78       |
| 54  | 55 | 56 | 10    | 119   | 78       |
| 55  | 56 | 57 | 10    | 119   | 78       |
| 56  | 57 | 58 | 10    | 119   | 78       |
| 57  | 58 | 59 | 10    | 119   | 78       |
| 58  | 59 | 60 | 10    | 119   | 78       |
| 59  | 60 | 61 | 10    | 119   | 78       |
| 60  | 61 | 62 | 10    | 119   | 78       |
| 61  | 62 | 63 | 10    | 119   | 78       |
| 62  | 63 | 64 | 10    | 119   | 78       |
| 63  | 64 | 65 | 10    | 119   | 78       |
| 64  | 65 | 66 | 10    | 119   | 78       |
| 65  | 66 | 67 | 10    | 119   | 78       |

|    |    |     |    |     |    |
|----|----|-----|----|-----|----|
| 66 | 67 | 68  | 10 | 119 | 78 |
| 67 | 68 | 69  | 10 | 119 | 78 |
| 68 | 69 | 70  | 10 | 119 | 78 |
| 69 | 70 | 71  | 10 | 119 | 78 |
| 70 | 71 | 72  | 10 | 119 | 78 |
| 71 | 72 | 73  | 10 | 119 | 78 |
| 72 | 73 | 74  | 10 | 119 | 78 |
| 73 | 74 | 75  | 10 | 119 | 78 |
| 74 | 75 | 76  | 10 | 119 | 78 |
| 75 | 76 | 77  | 10 | 119 | 78 |
| 76 | 77 | 78  | 10 | 119 | 78 |
| 77 | 78 | 79  | 10 | 119 | 78 |
| 78 | 79 | 80  | 10 | 119 | 78 |
| 79 | 80 | 81  | 10 | 119 | 78 |
| 80 | 81 | 82  | 10 | 119 | 78 |
| 81 | 82 | 83  | 10 | 119 | 78 |
| 82 | 83 | 84  | 10 | 119 | 78 |
| 83 | 84 | 85  | 10 | 119 | 78 |
| 84 | 85 | 86  | 10 | 119 | 78 |
| 85 | 86 | 87  | 10 | 119 | 78 |
| 86 | 87 | 88  | 10 | 119 | 78 |
| 87 | 88 | 89  | 10 | 119 | 78 |
| 88 | 89 | 90  | 10 | 119 | 78 |
| 89 | 90 | 91  | 10 | 119 | 78 |
| 90 | 91 | 92  | 10 | 119 | 78 |
| 91 | 92 | 93  | 10 | 119 | 78 |
| 92 | 93 | 94  | 10 | 119 | 78 |
| 93 | 94 | 95  | 10 | 119 | 78 |
| 94 | 95 | 96  | 10 | 119 | 78 |
| 95 | 96 | 97  | 10 | 119 | 78 |
| 96 | 97 | 98  | 10 | 119 | 78 |
| 97 | 98 | 99  | 10 | 119 | 78 |
| 98 | 99 | 100 | 10 | 119 | 78 |

[ dihedrals ]

| ; ai | aj | ak | al | funct | phi    | k     | n |
|------|----|----|----|-------|--------|-------|---|
| 1    | 2  | 3  | 4  | 9     | 100.00 | 3.10  | 1 |
| 1    | 2  | 3  | 4  | 9     | 190.00 | -5.90 | 2 |
| 2    | 3  | 4  | 5  | 9     | 100.00 | 3.10  | 1 |
| 2    | 3  | 4  | 5  | 9     | 190.00 | -5.90 | 2 |
| 3    | 4  | 5  | 6  | 9     | 100.00 | 3.10  | 1 |
| 3    | 4  | 5  | 6  | 9     | 190.00 | -5.90 | 2 |
| 4    | 5  | 6  | 7  | 9     | 100.00 | 3.10  | 1 |
| 4    | 5  | 6  | 7  | 9     | 190.00 | -5.90 | 2 |
| 5    | 6  | 7  | 8  | 9     | 100.00 | 3.10  | 1 |
| 5    | 6  | 7  | 8  | 9     | 190.00 | -5.90 | 2 |
| 6    | 7  | 8  | 9  | 9     | 100.00 | 3.10  | 1 |
| 6    | 7  | 8  | 9  | 9     | 190.00 | -5.90 | 2 |
| 7    | 8  | 9  | 10 | 9     | 100.00 | 3.10  | 1 |
| 7    | 8  | 9  | 10 | 9     | 190.00 | -5.90 | 2 |
| 8    | 9  | 10 | 11 | 9     | 100.00 | 3.10  | 1 |
| 8    | 9  | 10 | 11 | 9     | 190.00 | -5.90 | 2 |
| 9    | 10 | 11 | 12 | 9     | 100.00 | 3.10  | 1 |
| 9    | 10 | 11 | 12 | 9     | 190.00 | -5.90 | 2 |
| 10   | 11 | 12 | 13 | 9     | 100.00 | 3.10  | 1 |
| 10   | 11 | 12 | 13 | 9     | 190.00 | -5.90 | 2 |
| 11   | 12 | 13 | 14 | 9     | 100.00 | 3.10  | 1 |
| 11   | 12 | 13 | 14 | 9     | 190.00 | -5.90 | 2 |
| 12   | 13 | 14 | 15 | 9     | 100.00 | 3.10  | 1 |
| 12   | 13 | 14 | 15 | 9     | 190.00 | -5.90 | 2 |
| 13   | 14 | 15 | 16 | 9     | 100.00 | 3.10  | 1 |
| 13   | 14 | 15 | 16 | 9     | 190.00 | -5.90 | 2 |
| 14   | 15 | 16 | 17 | 9     | 100.00 | 3.10  | 1 |
| 14   | 15 | 16 | 17 | 9     | 190.00 | -5.90 | 2 |
| 15   | 16 | 17 | 18 | 9     | 100.00 | 3.10  | 1 |
| 15   | 16 | 17 | 18 | 9     | 190.00 | -5.90 | 2 |
| 16   | 17 | 18 | 19 | 9     | 100.00 | 3.10  | 1 |
| 16   | 17 | 18 | 19 | 9     | 190.00 | -5.90 | 2 |
| 17   | 18 | 19 | 20 | 9     | 100.00 | 3.10  | 1 |
| 17   | 18 | 19 | 20 | 9     | 190.00 | -5.90 | 2 |
| 18   | 19 | 20 | 21 | 9     | 100.00 | 3.10  | 1 |
| 18   | 19 | 20 | 21 | 9     | 190.00 | -5.90 | 2 |
| 19   | 20 | 21 | 22 | 9     | 100.00 | 3.10  | 1 |

|    |    |    |    |   |        |       |   |
|----|----|----|----|---|--------|-------|---|
| 19 | 20 | 21 | 22 | 9 | 190.00 | -5.90 | 2 |
| 20 | 21 | 22 | 23 | 9 | 100.00 | 3.10  | 1 |
| 20 | 21 | 22 | 23 | 9 | 190.00 | -5.90 | 2 |
| 21 | 22 | 23 | 24 | 9 | 100.00 | 3.10  | 1 |
| 21 | 22 | 23 | 24 | 9 | 190.00 | -5.90 | 2 |
| 22 | 23 | 24 | 25 | 9 | 100.00 | 3.10  | 1 |
| 22 | 23 | 24 | 25 | 9 | 190.00 | -5.90 | 2 |
| 23 | 24 | 25 | 26 | 9 | 100.00 | 3.10  | 1 |
| 23 | 24 | 25 | 26 | 9 | 190.00 | -5.90 | 2 |
| 24 | 25 | 26 | 27 | 9 | 100.00 | 3.10  | 1 |
| 24 | 25 | 26 | 27 | 9 | 190.00 | -5.90 | 2 |
| 25 | 26 | 27 | 28 | 9 | 100.00 | 3.10  | 1 |
| 25 | 26 | 27 | 28 | 9 | 190.00 | -5.90 | 2 |
| 26 | 27 | 28 | 29 | 9 | 100.00 | 3.10  | 1 |
| 26 | 27 | 28 | 29 | 9 | 190.00 | -5.90 | 2 |
| 27 | 28 | 29 | 30 | 9 | 100.00 | 3.10  | 1 |
| 27 | 28 | 29 | 30 | 9 | 190.00 | -5.90 | 2 |
| 28 | 29 | 30 | 31 | 9 | 100.00 | 3.10  | 1 |
| 28 | 29 | 30 | 31 | 9 | 190.00 | -5.90 | 2 |
| 29 | 30 | 31 | 32 | 9 | 100.00 | 3.10  | 1 |
| 29 | 30 | 31 | 32 | 9 | 190.00 | -5.90 | 2 |
| 30 | 31 | 32 | 33 | 9 | 100.00 | 3.10  | 1 |
| 30 | 31 | 32 | 33 | 9 | 190.00 | -5.90 | 2 |
| 31 | 32 | 33 | 34 | 9 | 100.00 | 3.10  | 1 |
| 31 | 32 | 33 | 34 | 9 | 190.00 | -5.90 | 2 |
| 32 | 33 | 34 | 35 | 9 | 100.00 | 3.10  | 1 |
| 32 | 33 | 34 | 35 | 9 | 190.00 | -5.90 | 2 |
| 33 | 34 | 35 | 36 | 9 | 100.00 | 3.10  | 1 |
| 33 | 34 | 35 | 36 | 9 | 190.00 | -5.90 | 2 |
| 34 | 35 | 36 | 37 | 9 | 100.00 | 3.10  | 1 |
| 34 | 35 | 36 | 37 | 9 | 190.00 | -5.90 | 2 |
| 35 | 36 | 37 | 38 | 9 | 100.00 | 3.10  | 1 |
| 35 | 36 | 37 | 38 | 9 | 190.00 | -5.90 | 2 |
| 36 | 37 | 38 | 39 | 9 | 100.00 | 3.10  | 1 |
| 36 | 37 | 38 | 39 | 9 | 190.00 | -5.90 | 2 |
| 37 | 38 | 39 | 40 | 9 | 100.00 | 3.10  | 1 |
| 37 | 38 | 39 | 40 | 9 | 190.00 | -5.90 | 2 |
| 38 | 39 | 40 | 41 | 9 | 100.00 | 3.10  | 1 |
| 38 | 39 | 40 | 41 | 9 | 190.00 | -5.90 | 2 |
| 39 | 40 | 41 | 42 | 9 | 100.00 | 3.10  | 1 |
| 39 | 40 | 41 | 42 | 9 | 190.00 | -5.90 | 2 |
| 40 | 41 | 42 | 43 | 9 | 100.00 | 3.10  | 1 |
| 40 | 41 | 42 | 43 | 9 | 190.00 | -5.90 | 2 |
| 41 | 42 | 43 | 44 | 9 | 100.00 | 3.10  | 1 |
| 41 | 42 | 43 | 44 | 9 | 190.00 | -5.90 | 2 |
| 42 | 43 | 44 | 45 | 9 | 100.00 | 3.10  | 1 |
| 42 | 43 | 44 | 45 | 9 | 190.00 | -5.90 | 2 |
| 43 | 44 | 45 | 46 | 9 | 100.00 | 3.10  | 1 |
| 43 | 44 | 45 | 46 | 9 | 190.00 | -5.90 | 2 |
| 44 | 45 | 46 | 47 | 9 | 100.00 | 3.10  | 1 |
| 44 | 45 | 46 | 47 | 9 | 190.00 | -5.90 | 2 |
| 45 | 46 | 47 | 48 | 9 | 100.00 | 3.10  | 1 |
| 45 | 46 | 47 | 48 | 9 | 190.00 | -5.90 | 2 |
| 46 | 47 | 48 | 49 | 9 | 100.00 | 3.10  | 1 |
| 46 | 47 | 48 | 49 | 9 | 190.00 | -5.90 | 2 |
| 47 | 48 | 49 | 50 | 9 | 100.00 | 3.10  | 1 |
| 47 | 48 | 49 | 50 | 9 | 190.00 | -5.90 | 2 |
| 48 | 49 | 50 | 51 | 9 | 100.00 | 3.10  | 1 |
| 48 | 49 | 50 | 51 | 9 | 190.00 | -5.90 | 2 |
| 49 | 50 | 51 | 52 | 9 | 100.00 | 3.10  | 1 |
| 49 | 50 | 51 | 52 | 9 | 190.00 | -5.90 | 2 |
| 50 | 51 | 52 | 53 | 9 | 100.00 | 3.10  | 1 |
| 50 | 51 | 52 | 53 | 9 | 190.00 | -5.90 | 2 |
| 51 | 52 | 53 | 54 | 9 | 100.00 | 3.10  | 1 |
| 51 | 52 | 53 | 54 | 9 | 190.00 | -5.90 | 2 |
| 52 | 53 | 54 | 55 | 9 | 100.00 | 3.10  | 1 |
| 52 | 53 | 54 | 55 | 9 | 190.00 | -5.90 | 2 |
| 53 | 54 | 55 | 56 | 9 | 100.00 | 3.10  | 1 |
| 53 | 54 | 55 | 56 | 9 | 190.00 | -5.90 | 2 |
| 54 | 55 | 56 | 57 | 9 | 100.00 | 3.10  | 1 |
| 54 | 55 | 56 | 57 | 9 | 190.00 | -5.90 | 2 |
| 55 | 56 | 57 | 58 | 9 | 100.00 | 3.10  | 1 |
| 55 | 56 | 57 | 58 | 9 | 190.00 | -5.90 | 2 |

|    |    |    |    |   |        |       |   |
|----|----|----|----|---|--------|-------|---|
| 56 | 57 | 58 | 59 | 9 | 100.00 | 3.10  | 1 |
| 56 | 57 | 58 | 59 | 9 | 190.00 | -5.90 | 2 |
| 57 | 58 | 59 | 60 | 9 | 100.00 | 3.10  | 1 |
| 57 | 58 | 59 | 60 | 9 | 190.00 | -5.90 | 2 |
| 58 | 59 | 60 | 61 | 9 | 100.00 | 3.10  | 1 |
| 58 | 59 | 60 | 61 | 9 | 190.00 | -5.90 | 2 |
| 59 | 60 | 61 | 62 | 9 | 100.00 | 3.10  | 1 |
| 59 | 60 | 61 | 62 | 9 | 190.00 | -5.90 | 2 |
| 60 | 61 | 62 | 63 | 9 | 100.00 | 3.10  | 1 |
| 60 | 61 | 62 | 63 | 9 | 190.00 | -5.90 | 2 |
| 61 | 62 | 63 | 64 | 9 | 100.00 | 3.10  | 1 |
| 61 | 62 | 63 | 64 | 9 | 190.00 | -5.90 | 2 |
| 62 | 63 | 64 | 65 | 9 | 100.00 | 3.10  | 1 |
| 62 | 63 | 64 | 65 | 9 | 190.00 | -5.90 | 2 |
| 63 | 64 | 65 | 66 | 9 | 100.00 | 3.10  | 1 |
| 63 | 64 | 65 | 66 | 9 | 190.00 | -5.90 | 2 |
| 64 | 65 | 66 | 67 | 9 | 100.00 | 3.10  | 1 |
| 64 | 65 | 66 | 67 | 9 | 190.00 | -5.90 | 2 |
| 65 | 66 | 67 | 68 | 9 | 100.00 | 3.10  | 1 |
| 65 | 66 | 67 | 68 | 9 | 190.00 | -5.90 | 2 |
| 66 | 67 | 68 | 69 | 9 | 100.00 | 3.10  | 1 |
| 66 | 67 | 68 | 69 | 9 | 190.00 | -5.90 | 2 |
| 67 | 68 | 69 | 70 | 9 | 100.00 | 3.10  | 1 |
| 67 | 68 | 69 | 70 | 9 | 190.00 | -5.90 | 2 |
| 68 | 69 | 70 | 71 | 9 | 100.00 | 3.10  | 1 |
| 68 | 69 | 70 | 71 | 9 | 190.00 | -5.90 | 2 |
| 69 | 70 | 71 | 72 | 9 | 100.00 | 3.10  | 1 |
| 69 | 70 | 71 | 72 | 9 | 190.00 | -5.90 | 2 |
| 70 | 71 | 72 | 73 | 9 | 100.00 | 3.10  | 1 |
| 70 | 71 | 72 | 73 | 9 | 190.00 | -5.90 | 2 |
| 71 | 72 | 73 | 74 | 9 | 100.00 | 3.10  | 1 |
| 71 | 72 | 73 | 74 | 9 | 190.00 | -5.90 | 2 |
| 72 | 73 | 74 | 75 | 9 | 100.00 | 3.10  | 1 |
| 72 | 73 | 74 | 75 | 9 | 190.00 | -5.90 | 2 |
| 73 | 74 | 75 | 76 | 9 | 100.00 | 3.10  | 1 |
| 73 | 74 | 75 | 76 | 9 | 190.00 | -5.90 | 2 |
| 74 | 75 | 76 | 77 | 9 | 100.00 | 3.10  | 1 |
| 74 | 75 | 76 | 77 | 9 | 190.00 | -5.90 | 2 |
| 75 | 76 | 77 | 78 | 9 | 100.00 | 3.10  | 1 |
| 75 | 76 | 77 | 78 | 9 | 190.00 | -5.90 | 2 |
| 76 | 77 | 78 | 79 | 9 | 100.00 | 3.10  | 1 |
| 76 | 77 | 78 | 79 | 9 | 190.00 | -5.90 | 2 |
| 77 | 78 | 79 | 80 | 9 | 100.00 | 3.10  | 1 |
| 77 | 78 | 79 | 80 | 9 | 190.00 | -5.90 | 2 |
| 78 | 79 | 80 | 81 | 9 | 100.00 | 3.10  | 1 |
| 78 | 79 | 80 | 81 | 9 | 190.00 | -5.90 | 2 |
| 79 | 80 | 81 | 82 | 9 | 100.00 | 3.10  | 1 |
| 79 | 80 | 81 | 82 | 9 | 190.00 | -5.90 | 2 |
| 80 | 81 | 82 | 83 | 9 | 100.00 | 3.10  | 1 |
| 80 | 81 | 82 | 83 | 9 | 190.00 | -5.90 | 2 |
| 81 | 82 | 83 | 84 | 9 | 100.00 | 3.10  | 1 |
| 81 | 82 | 83 | 84 | 9 | 190.00 | -5.90 | 2 |
| 82 | 83 | 84 | 85 | 9 | 100.00 | 3.10  | 1 |
| 82 | 83 | 84 | 85 | 9 | 190.00 | -5.90 | 2 |
| 83 | 84 | 85 | 86 | 9 | 100.00 | 3.10  | 1 |
| 83 | 84 | 85 | 86 | 9 | 190.00 | -5.90 | 2 |
| 84 | 85 | 86 | 87 | 9 | 100.00 | 3.10  | 1 |
| 84 | 85 | 86 | 87 | 9 | 190.00 | -5.90 | 2 |
| 85 | 86 | 87 | 88 | 9 | 100.00 | 3.10  | 1 |
| 85 | 86 | 87 | 88 | 9 | 190.00 | -5.90 | 2 |
| 86 | 87 | 88 | 89 | 9 | 100.00 | 3.10  | 1 |
| 86 | 87 | 88 | 89 | 9 | 190.00 | -5.90 | 2 |
| 87 | 88 | 89 | 90 | 9 | 100.00 | 3.10  | 1 |
| 87 | 88 | 89 | 90 | 9 | 190.00 | -5.90 | 2 |
| 88 | 89 | 90 | 91 | 9 | 100.00 | 3.10  | 1 |
| 88 | 89 | 90 | 91 | 9 | 190.00 | -5.90 | 2 |
| 89 | 90 | 91 | 92 | 9 | 100.00 | 3.10  | 1 |
| 89 | 90 | 91 | 92 | 9 | 190.00 | -5.90 | 2 |
| 90 | 91 | 92 | 93 | 9 | 100.00 | 3.10  | 1 |
| 90 | 91 | 92 | 93 | 9 | 190.00 | -5.90 | 2 |
| 91 | 92 | 93 | 94 | 9 | 100.00 | 3.10  | 1 |
| 91 | 92 | 93 | 94 | 9 | 190.00 | -5.90 | 2 |
| 92 | 93 | 94 | 95 | 9 | 100.00 | 3.10  | 1 |

|    |    |    |     |   |        |       |   |
|----|----|----|-----|---|--------|-------|---|
| 92 | 93 | 94 | 95  | 9 | 190.00 | -5.90 | 2 |
| 93 | 94 | 95 | 96  | 9 | 100.00 | 3.10  | 1 |
| 93 | 94 | 95 | 96  | 9 | 190.00 | -5.90 | 2 |
| 94 | 95 | 96 | 97  | 9 | 100.00 | 3.10  | 1 |
| 94 | 95 | 96 | 97  | 9 | 190.00 | -5.90 | 2 |
| 95 | 96 | 97 | 98  | 9 | 100.00 | 3.10  | 1 |
| 95 | 96 | 97 | 98  | 9 | 190.00 | -5.90 | 2 |
| 96 | 97 | 98 | 99  | 9 | 100.00 | 3.10  | 1 |
| 96 | 97 | 98 | 99  | 9 | 190.00 | -5.90 | 2 |
| 97 | 98 | 99 | 100 | 9 | 100.00 | 3.10  | 1 |
| 97 | 98 | 99 | 100 | 9 | 190.00 | -5.90 | 2 |

### 3.1 Polyethylene NP Coordinates

POLYETHYLENE

1120

|     |     |    |        |        |        |        |         |         |
|-----|-----|----|--------|--------|--------|--------|---------|---------|
| 1PE | C1  | 1  | 11.451 | 17.082 | 11.380 | 0.2420 | -0.2185 | 0.0258  |
| 1PE | C2  | 2  | 11.751 | 16.942 | 11.101 | 0.2223 | -0.1860 | -0.0309 |
| 1PE | C3  | 3  | 12.118 | 17.068 | 10.967 | 0.2001 | -0.1806 | -0.0543 |
| 1PE | C4  | 4  | 12.506 | 17.056 | 11.107 | 0.2139 | -0.2076 | -0.0937 |
| 1PE | C5  | 5  | 12.630 | 16.877 | 11.491 | 0.2467 | -0.2154 | -0.1175 |
| 1PE | C6  | 6  | 12.421 | 16.937 | 11.882 | 0.2995 | -0.2677 | -0.1069 |
| 1PE | C7  | 7  | 12.052 | 17.150 | 12.014 | 0.3056 | -0.2735 | -0.0295 |
| 1PE | C8  | 8  | 11.659 | 17.207 | 12.231 | 0.3238 | -0.3044 | 0.0089  |
| 1PE | C9  | 9  | 11.453 | 17.509 | 12.470 | 0.3362 | -0.3343 | 0.0532  |
| 1PE | C10 | 10 | 11.274 | 17.916 | 12.383 | 0.3234 | -0.3278 | 0.1042  |
| 1PE | C11 | 11 | 10.996 | 18.103 | 12.065 | 0.3031 | -0.2969 | 0.1543  |
| 1PE | C12 | 12 | 10.679 | 18.096 | 11.733 | 0.2723 | -0.2867 | 0.2003  |
| 1PE | C13 | 13 | 10.365 | 18.083 | 11.423 | 0.2281 | -0.2379 | 0.2079  |
| 1PE | C14 | 14 | 9.939  | 18.190 | 11.366 | 0.2265 | -0.2499 | 0.2689  |
| 1PE | C15 | 15 | 9.593  | 18.511 | 11.279 | 0.2237 | -0.2352 | 0.3364  |
| 1PE | C16 | 16 | 9.623  | 18.960 | 11.240 | 0.2110 | -0.2440 | 0.3891  |
| 1PE | C17 | 17 | 10.011 | 19.191 | 11.172 | 0.1958 | -0.2174 | 0.3574  |
| 1PE | C18 | 18 | 10.394 | 19.000 | 11.044 | 0.1861 | -0.2100 | 0.2924  |
| 1PE | C19 | 19 | 10.581 | 18.596 | 11.128 | 0.1953 | -0.2302 | 0.2421  |
| 1PE | C20 | 20 | 10.830 | 18.239 | 11.231 | 0.2146 | -0.2034 | 0.1922  |
| 1PE | C21 | 21 | 11.150 | 17.951 | 11.085 | 0.2003 | -0.2046 | 0.1350  |
| 1PE | C22 | 22 | 11.519 | 17.713 | 10.974 | 0.2040 | -0.1923 | 0.0666  |
| 1PE | C23 | 23 | 11.775 | 17.436 | 11.195 | 0.2004 | -0.2131 | 0.0139  |
| 1PE | C24 | 24 | 11.758 | 17.378 | 11.649 | 0.2589 | -0.2585 | 0.0234  |
| 1PE | C25 | 25 | 11.597 | 17.646 | 11.970 | 0.3009 | -0.2887 | 0.0483  |
| 1PE | C26 | 26 | 11.517 | 18.073 | 11.971 | 0.2989 | -0.2699 | 0.1092  |
| 1PE | C27 | 27 | 11.362 | 18.483 | 12.032 | 0.2799 | -0.2937 | 0.1534  |
| 1PE | C28 | 28 | 11.056 | 18.812 | 12.043 | 0.2944 | -0.2907 | 0.2212  |
| 1PE | C29 | 29 | 10.626 | 18.907 | 12.112 | 0.2947 | -0.3045 | 0.2694  |
| 1PE | C30 | 30 | 10.285 | 18.723 | 11.916 | 0.2885 | -0.2966 | 0.2838  |
| 1PE | C31 | 31 | 10.263 | 18.576 | 11.515 | 0.2427 | -0.2470 | 0.2822  |
| 1PE | C32 | 32 | 10.066 | 18.644 | 11.161 | 0.2151 | -0.2159 | 0.3097  |
| 1PE | C33 | 33 | 9.894  | 18.844 | 10.824 | 0.1567 | -0.1807 | 0.3343  |
| 1PE | C34 | 34 | 10.014 | 19.235 | 10.648 | 0.1537 | -0.1643 | 0.3558  |
| 1PE | C35 | 35 | 10.318 | 19.499 | 10.855 | 0.1543 | -0.1944 | 0.3578  |
| 1PE | C36 | 36 | 10.446 | 19.439 | 11.298 | 0.2115 | -0.2324 | 0.3431  |
| 1PE | C37 | 37 | 10.453 | 19.069 | 11.560 | 0.2382 | -0.2629 | 0.3076  |
| 1PE | C38 | 38 | 10.723 | 18.714 | 11.639 | 0.2568 | -0.2534 | 0.2468  |
| 1PE | C39 | 39 | 11.032 | 18.430 | 11.661 | 0.2644 | -0.2592 | 0.1925  |
| 1PE | C40 | 40 | 11.235 | 18.073 | 11.552 | 0.2458 | -0.2462 | 0.1367  |
| 1PE | C41 | 41 | 11.669 | 17.889 | 11.526 | 0.2593 | -0.2393 | 0.0697  |
| 1PE | C42 | 42 | 12.016 | 17.864 | 11.263 | 0.2136 | -0.2034 | 0.0294  |
| 1PE | C43 | 43 | 12.381 | 18.027 | 11.056 | 0.2002 | -0.1820 | 0.0178  |
| 1PE | C44 | 44 | 12.417 | 18.327 | 10.740 | 0.1677 | -0.1655 | 0.0484  |
| 1PE | C45 | 45 | 12.059 | 18.456 | 10.521 | 0.1424 | -0.1514 | 0.0862  |
| 1PE | C46 | 46 | 11.666 | 18.476 | 10.726 | 0.1620 | -0.1711 | 0.1299  |
| 1PE | C47 | 47 | 11.565 | 18.689 | 11.108 | 0.2068 | -0.1934 | 0.1670  |
| 1PE | C48 | 48 | 11.847 | 18.838 | 11.411 | 0.2268 | -0.2364 | 0.1388  |
| 1PE | C49 | 49 | 12.284 | 18.748 | 11.435 | 0.2260 | -0.2313 | 0.0931  |
| 1PE | C50 | 50 | 12.507 | 18.354 | 11.420 | 0.2265 | -0.2240 | 0.0288  |
| 1PE | C51 | 51 | 12.409 | 17.929 | 11.566 | 0.2483 | -0.2435 | -0.0045 |
| 1PE | C52 | 52 | 12.109 | 17.694 | 11.820 | 0.2830 | -0.2521 | 0.0137  |
| 1PE | C53 | 53 | 11.997 | 17.608 | 12.259 | 0.3128 | -0.3116 | 0.0072  |
| 1PE | C54 | 54 | 11.779 | 17.906 | 12.518 | 0.3553 | -0.3322 | 0.0715  |
| 1PE | C55 | 55 | 11.724 | 18.325 | 12.364 | 0.3285 | -0.3210 | 0.1114  |
| 1PE | C56 | 56 | 11.873 | 18.459 | 11.942 | 0.2927 | -0.2774 | 0.1072  |
| 1PE | C57 | 57 | 12.013 | 18.290 | 11.542 | 0.2389 | -0.2351 | 0.0741  |
| 1PE | C58 | 58 | 12.048 | 18.419 | 11.111 | 0.2050 | -0.1882 | 0.0859  |
| 1PE | C59 | 59 | 12.015 | 18.820 | 10.903 | 0.1738 | -0.1727 | 0.1270  |
| 1PE | C60 | 60 | 11.709 | 19.162 | 10.984 | 0.1705 | -0.1796 | 0.1872  |
| 1PE | C61 | 61 | 11.364 | 19.140 | 11.289 | 0.2204 | -0.2299 | 0.2196  |
| 1PE | C62 | 62 | 11.363 | 18.831 | 11.615 | 0.2528 | -0.2515 | 0.1812  |
| 1PE | C63 | 63 | 11.544 | 18.438 | 11.542 | 0.2475 | -0.2614 | 0.1461  |
| 1PE | C64 | 64 | 11.596 | 18.194 | 11.148 | 0.2024 | -0.1939 | 0.1048  |
| 1PE | C65 | 65 | 11.874 | 18.037 | 10.815 | 0.1732 | -0.1825 | 0.0585  |
| 1PE | C66 | 66 | 12.182 | 17.896 | 10.548 | 0.1518 | -0.1461 | 0.0163  |
| 1PE | C67 | 67 | 12.429 | 17.616 | 10.292 | 0.1330 | -0.1204 | -0.0261 |
| 1PE | C68 | 68 | 12.760 | 17.354 | 10.158 | 0.0910 | -0.1010 | -0.0797 |

|     |     |     |        |        |        |        |         |         |
|-----|-----|-----|--------|--------|--------|--------|---------|---------|
| 1PE | C69 | 69  | 12.919 | 16.952 | 10.274 | 0.1330 | -0.1068 | -0.1369 |
| 1PE | C70 | 70  | 12.750 | 16.643 | 10.558 | 0.1501 | -0.1321 | -0.1547 |
| 1PE | C71 | 71  | 12.381 | 16.655 | 10.802 | 0.1826 | -0.1606 | -0.1127 |
| 1PE | C72 | 72  | 11.961 | 16.551 | 10.863 | 0.1882 | -0.1760 | -0.0938 |
| 1PE | C73 | 73  | 11.737 | 16.294 | 11.119 | 0.2381 | -0.1956 | -0.0900 |
| 1PE | C74 | 74  | 11.638 | 15.873 | 11.123 | 0.2165 | -0.2018 | -0.1279 |
| 1PE | C75 | 75  | 11.428 | 15.606 | 10.828 | 0.1940 | -0.1741 | -0.1236 |
| 1PE | C76 | 76  | 11.184 | 15.395 | 10.497 | 0.1620 | -0.1545 | -0.1066 |
| 1PE | C77 | 77  | 10.888 | 15.368 | 10.133 | 0.1388 | -0.0974 | -0.0775 |
| 1PE | C78 | 78  | 10.754 | 15.338 | 9.681  | 0.1010 | -0.0714 | -0.0796 |
| 1PE | C79 | 79  | 10.680 | 15.338 | 9.222  | 0.0287 | -0.0328 | -0.0814 |
| 1PE | C80 | 80  | 10.435 | 15.313 | 8.830  | 0.0164 | 0.0017  | -0.0432 |
| 1PE | C1  | 81  | 11.324 | 18.517 | 10.374 | 0.1132 | -0.1294 | 0.1531  |
| 1PE | C2  | 82  | 10.959 | 18.333 | 10.441 | 0.1376 | -0.1490 | 0.1904  |
| 1PE | C3  | 83  | 10.637 | 18.265 | 10.728 | 0.1617 | -0.1753 | 0.2097  |
| 1PE | C4  | 84  | 10.248 | 18.219 | 10.935 | 0.1675 | -0.1936 | 0.2466  |
| 1PE | C5  | 85  | 9.820  | 18.336 | 10.848 | 0.1701 | -0.1898 | 0.2947  |
| 1PE | C6  | 86  | 9.616  | 18.227 | 10.464 | 0.1376 | -0.1685 | 0.3075  |
| 1PE | C7  | 87  | 9.886  | 18.020 | 10.113 | 0.1071 | -0.1343 | 0.2572  |
| 1PE | C8  | 88  | 10.345 | 18.035 | 10.037 | 0.0990 | -0.1144 | 0.2242  |
| 1PE | C9  | 89  | 10.754 | 17.933 | 10.227 | 0.1243 | -0.1323 | 0.1793  |
| 1PE | C10 | 90  | 10.892 | 17.851 | 10.628 | 0.1468 | -0.1560 | 0.1449  |
| 1PE | C11 | 91  | 10.678 | 17.819 | 11.015 | 0.1952 | -0.2019 | 0.1669  |
| 1PE | C12 | 92  | 10.783 | 17.727 | 11.434 | 0.2329 | -0.2544 | 0.1579  |
| 1PE | C13 | 93  | 10.688 | 17.496 | 11.812 | 0.2839 | -0.2781 | 0.1305  |
| 1PE | C14 | 94  | 10.810 | 17.092 | 11.975 | 0.3139 | -0.2776 | 0.0767  |
| 1PE | C15 | 95  | 10.834 | 16.645 | 12.042 | 0.3168 | -0.3000 | 0.0419  |
| 1PE | C16 | 96  | 10.887 | 16.311 | 11.742 | 0.2763 | -0.2880 | 0.0009  |
| 1PE | C17 | 97  | 10.950 | 16.398 | 11.288 | 0.2222 | -0.2106 | 0.0024  |
| 1PE | C18 | 98  | 11.345 | 16.614 | 11.172 | 0.2332 | -0.1988 | -0.0034 |
| 1PE | C19 | 99  | 11.691 | 16.651 | 11.476 | 0.2654 | -0.2307 | -0.0573 |
| 1PE | C20 | 100 | 11.665 | 16.917 | 11.810 | 0.2858 | -0.2685 | -0.0169 |
| 1PE | C21 | 101 | 11.308 | 17.216 | 11.852 | 0.2819 | -0.2604 | 0.0424  |
| 1PE | C22 | 102 | 10.991 | 17.227 | 11.529 | 0.2592 | -0.2497 | 0.0753  |
| 1PE | C23 | 103 | 11.023 | 16.992 | 11.170 | 0.2123 | -0.2090 | 0.0576  |
| 1PE | C24 | 104 | 11.320 | 17.016 | 10.847 | 0.1892 | -0.1626 | 0.0076  |
| 1PE | C25 | 105 | 11.675 | 17.243 | 10.719 | 0.1781 | -0.1538 | 0.0180  |
| 1PE | C26 | 106 | 12.067 | 17.414 | 10.621 | 0.1598 | -0.1596 | -0.0165 |
| 1PE | C27 | 107 | 12.335 | 17.547 | 10.945 | 0.1914 | -0.1738 | -0.0196 |
| 1PE | C28 | 108 | 12.250 | 17.427 | 11.391 | 0.2219 | -0.2268 | -0.0213 |
| 1PE | C29 | 109 | 12.084 | 17.025 | 11.495 | 0.2506 | -0.2343 | -0.0320 |
| 1PE | C30 | 110 | 12.182 | 16.653 | 11.308 | 0.2352 | -0.2162 | -0.0923 |
| 1PE | C31 | 111 | 12.290 | 16.264 | 11.149 | 0.2055 | -0.1994 | -0.1542 |
| 1PE | C32 | 112 | 12.170 | 15.850 | 11.299 | 0.2445 | -0.2078 | -0.1767 |
| 1PE | C33 | 113 | 12.120 | 15.785 | 11.776 | 0.2781 | -0.2493 | -0.1526 |
| 1PE | C34 | 114 | 11.910 | 16.118 | 12.062 | 0.3380 | -0.2864 | -0.1283 |
| 1PE | C35 | 115 | 11.578 | 16.390 | 11.896 | 0.3070 | -0.2779 | -0.0389 |
| 1PE | C36 | 116 | 11.375 | 16.273 | 11.518 | 0.2576 | -0.2516 | -0.0553 |
| 1PE | C37 | 117 | 11.114 | 15.942 | 11.419 | 0.2536 | -0.2395 | -0.0608 |
| 1PE | C38 | 118 | 10.654 | 15.948 | 11.484 | 0.2605 | -0.2521 | -0.0047 |
| 1PE | C39 | 119 | 10.379 | 16.313 | 11.606 | 0.2747 | -0.2602 | 0.0632  |
| 1PE | C40 | 120 | 10.293 | 16.679 | 11.362 | 0.2413 | -0.2319 | 0.0965  |
| 1PE | C41 | 121 | 10.587 | 16.834 | 11.060 | 0.2171 | -0.1973 | 0.0866  |
| 1PE | C42 | 122 | 10.954 | 16.621 | 10.842 | 0.1982 | -0.1754 | 0.0164  |
| 1PE | C43 | 123 | 10.890 | 16.264 | 10.603 | 0.1685 | -0.1666 | -0.0046 |
| 1PE | C44 | 124 | 10.471 | 16.120 | 10.533 | 0.1751 | -0.1620 | 0.0171  |
| 1PE | C45 | 125 | 10.114 | 16.371 | 10.642 | 0.1729 | -0.1762 | 0.0989  |
| 1PE | C46 | 126 | 10.102 | 16.760 | 10.889 | 0.1836 | -0.1991 | 0.1233  |
| 1PE | C47 | 127 | 10.236 | 17.170 | 11.057 | 0.2184 | -0.2140 | 0.1576  |
| 1PE | C48 | 128 | 10.642 | 17.336 | 11.120 | 0.2138 | -0.2106 | 0.1259  |
| 1PE | C49 | 129 | 11.061 | 17.460 | 11.056 | 0.1964 | -0.2024 | 0.1006  |
| 1PE | C50 | 130 | 11.311 | 17.577 | 11.409 | 0.2204 | -0.2350 | 0.0692  |
| 1PE | C51 | 131 | 11.140 | 17.685 | 11.812 | 0.2932 | -0.2658 | 0.1085  |
| 1PE | C52 | 132 | 11.031 | 17.517 | 12.183 | 0.3187 | -0.3160 | 0.0876  |
| 1PE | C53 | 133 | 11.130 | 17.124 | 12.360 | 0.3490 | -0.3220 | 0.0481  |
| 1PE | C54 | 134 | 11.311 | 16.788 | 12.121 | 0.3113 | -0.3022 | 0.0094  |
| 1PE | C55 | 135 | 11.195 | 16.721 | 11.684 | 0.2764 | -0.2680 | 0.0312  |
| 1PE | C56 | 136 | 10.772 | 16.779 | 11.549 | 0.2681 | -0.2535 | 0.0657  |
| 1PE | C57 | 137 | 10.500 | 17.105 | 11.545 | 0.2598 | -0.2473 | 0.1173  |
| 1PE | C58 | 138 | 10.080 | 17.143 | 11.548 | 0.2663 | -0.2610 | 0.1598  |
| 1PE | C59 | 139 | 9.811  | 16.960 | 11.256 | 0.2264 | -0.2288 | 0.1626  |
| 1PE | C60 | 140 | 9.781  | 16.507 | 11.162 | 0.2125 | -0.2217 | 0.1241  |
| 1PE | C61 | 141 | 10.152 | 16.230 | 11.149 | 0.2294 | -0.2195 | 0.0653  |

|     |     |     |        |        |        |         |         |         |
|-----|-----|-----|--------|--------|--------|---------|---------|---------|
| 1PE | C62 | 142 | 10.530 | 16.354 | 10.971 | 0.2109  | -0.1967 | 0.0376  |
| 1PE | C63 | 143 | 10.527 | 16.653 | 10.594 | 0.1711  | -0.1561 | 0.0667  |
| 1PE | C64 | 144 | 10.166 | 16.818 | 10.392 | 0.1225  | -0.1478 | 0.1292  |
| 1PE | C65 | 145 | 9.845  | 16.643 | 10.192 | 0.1240  | -0.1333 | 0.1407  |
| 1PE | C66 | 146 | 9.803  | 16.215 | 10.168 | 0.1311  | -0.1292 | 0.1021  |
| 1PE | C67 | 147 | 10.012 | 15.910 | 10.388 | 0.1578  | -0.1512 | 0.0404  |
| 1PE | C68 | 148 | 10.148 | 15.845 | 10.801 | 0.1825  | -0.1711 | 0.0170  |
| 1PE | C69 | 149 | 10.531 | 15.845 | 11.004 | 0.2109  | -0.1996 | -0.0102 |
| 1PE | C70 | 150 | 10.962 | 15.881 | 10.943 | 0.1959  | -0.1963 | -0.0317 |
| 1PE | C71 | 151 | 11.288 | 16.161 | 10.905 | 0.1967  | -0.1808 | -0.0483 |
| 1PE | C72 | 152 | 11.428 | 16.510 | 10.692 | 0.1834  | -0.1688 | -0.0370 |
| 1PE | C73 | 153 | 11.681 | 16.769 | 10.491 | 0.1506  | -0.1312 | -0.0283 |
| 1PE | C74 | 154 | 12.080 | 16.912 | 10.501 | 0.1483  | -0.1365 | -0.0586 |
| 1PE | C75 | 155 | 12.486 | 17.098 | 10.548 | 0.1618  | -0.1446 | -0.0848 |
| 1PE | C76 | 156 | 12.741 | 17.436 | 10.672 | 0.1744  | -0.1505 | -0.0967 |
| 1PE | C77 | 157 | 12.702 | 17.893 | 10.640 | 0.1524  | -0.1514 | -0.0377 |
| 1PE | C78 | 158 | 12.540 | 18.144 | 10.275 | 0.1299  | -0.1219 | 0.0070  |
| 1PE | C79 | 159 | 12.191 | 18.016 | 10.036 | 0.0917  | -0.0922 | 0.0443  |
| 1PE | C80 | 160 | 11.962 | 17.649 | 10.088 | 0.1016  | -0.0929 | 0.0205  |
| 1PE | C1  | 161 | 9.508  | 17.962 | 8.819  | -0.0405 | -0.0101 | 0.2870  |
| 1PE | C2  | 162 | 9.421  | 17.863 | 9.252  | 0.0135  | -0.0366 | 0.2947  |
| 1PE | C3  | 163 | 9.376  | 17.569 | 9.607  | 0.0450  | -0.0819 | 0.2787  |
| 1PE | C4  | 164 | 9.362  | 17.342 | 10.020 | 0.1059  | -0.1266 | 0.2554  |
| 1PE | C5  | 165 | 9.449  | 17.020 | 10.346 | 0.1349  | -0.1517 | 0.2178  |
| 1PE | C6  | 166 | 9.773  | 17.028 | 10.631 | 0.1670  | -0.1767 | 0.1889  |
| 1PE | C7  | 167 | 10.145 | 17.281 | 10.579 | 0.1621  | -0.1663 | 0.1671  |
| 1PE | C8  | 168 | 10.485 | 17.156 | 10.253 | 0.1333  | -0.1202 | 0.1345  |
| 1PE | C9  | 169 | 10.378 | 16.846 | 9.919  | 0.0978  | -0.1065 | 0.1014  |
| 1PE | C10 | 170 | 9.948  | 16.839 | 9.716  | 0.0709  | -0.0699 | 0.1451  |
| 1PE | C11 | 171 | 9.725  | 17.216 | 9.626  | 0.0710  | -0.0802 | 0.1896  |
| 1PE | C12 | 172 | 9.785  | 17.585 | 9.903  | 0.0836  | -0.1083 | 0.2357  |
| 1PE | C13 | 173 | 10.162 | 17.598 | 10.175 | 0.1174  | -0.1414 | 0.1976  |
| 1PE | C14 | 174 | 10.568 | 17.555 | 9.984  | 0.0855  | -0.1259 | 0.1368  |
| 1PE | C15 | 175 | 10.688 | 17.316 | 9.638  | 0.0685  | -0.0571 | 0.1236  |
| 1PE | C16 | 176 | 10.777 | 16.877 | 9.538  | 0.0526  | -0.0561 | 0.0652  |
| 1PE | C17 | 177 | 10.652 | 16.480 | 9.686  | 0.0886  | -0.0699 | 0.0239  |
| 1PE | C18 | 178 | 10.535 | 16.096 | 9.724  | 0.0860  | -0.0830 | 0.0052  |
| 1PE | C19 | 179 | 10.472 | 15.724 | 9.509  | 0.0680  | -0.0660 | -0.0146 |
| 1PE | C20 | 180 | 10.133 | 15.619 | 9.217  | 0.0343  | -0.0245 | 0.0281  |
| 1PE | C21 | 181 | 9.763  | 15.874 | 9.095  | 0.0117  | -0.0263 | 0.0678  |
| 1PE | C22 | 182 | 9.699  | 16.278 | 8.873  | -0.0011 | -0.0164 | 0.1163  |
| 1PE | C23 | 183 | 10.014 | 16.579 | 8.796  | -0.0121 | 0.0124  | 0.1151  |
| 1PE | C24 | 184 | 10.437 | 16.490 | 8.890  | 0.0043  | -0.0080 | 0.0572  |
| 1PE | C25 | 185 | 10.532 | 16.229 | 9.217  | 0.0306  | -0.0249 | 0.0337  |
| 1PE | C26 | 186 | 10.149 | 16.107 | 9.382  | 0.0562  | -0.0540 | 0.0609  |
| 1PE | C27 | 187 | 9.808  | 16.441 | 9.342  | 0.0352  | -0.0427 | 0.1145  |
| 1PE | C28 | 188 | 9.897  | 16.895 | 9.183  | 0.0233  | -0.0259 | 0.1582  |
| 1PE | C29 | 189 | 10.287 | 17.016 | 8.968  | -0.0031 | -0.0030 | 0.1397  |
| 1PE | C30 | 190 | 10.716 | 16.861 | 9.012  | -0.0015 | -0.0141 | 0.0732  |
| 1PE | C31 | 191 | 10.933 | 16.463 | 8.899  | -0.0019 | 0.0081  | 0.0114  |
| 1PE | C32 | 192 | 10.997 | 16.029 | 9.012  | 0.0006  | 0.0002  | -0.0236 |
| 1PE | C33 | 193 | 10.984 | 15.751 | 9.385  | 0.0399  | -0.0503 | -0.0692 |
| 1PE | C34 | 194 | 10.891 | 15.788 | 9.841  | 0.1009  | -0.0883 | -0.0339 |
| 1PE | C35 | 195 | 10.884 | 16.125 | 10.113 | 0.1037  | -0.1201 | -0.0097 |
| 1PE | C36 | 196 | 11.240 | 16.366 | 10.243 | 0.1387  | -0.1233 | -0.0218 |
| 1PE | C37 | 197 | 11.629 | 16.441 | 10.051 | 0.1225  | -0.1145 | -0.0592 |
| 1PE | C38 | 198 | 11.981 | 16.716 | 10.038 | 0.1078  | -0.0888 | -0.0764 |
| 1PE | C39 | 199 | 12.409 | 16.724 | 10.185 | 0.1248  | -0.1077 | -0.1169 |
| 1PE | C40 | 200 | 12.778 | 16.542 | 10.047 | 0.1139  | -0.0892 | -0.1733 |
| 1PE | C41 | 201 | 13.026 | 16.623 | 9.664  | 0.0687  | -0.0571 | -0.1830 |
| 1PE | C42 | 202 | 12.896 | 16.907 | 9.326  | 0.0263  | -0.0186 | -0.1495 |
| 1PE | C43 | 203 | 12.469 | 17.048 | 9.281  | 0.0355  | -0.0131 | -0.0857 |
| 1PE | C44 | 204 | 12.117 | 17.135 | 9.539  | 0.0625  | -0.0332 | -0.0439 |
| 1PE | C45 | 205 | 11.736 | 17.079 | 9.764  | 0.0716  | -0.0916 | -0.0024 |
| 1PE | C46 | 206 | 11.431 | 16.912 | 10.064 | 0.0991  | -0.1123 | 0.0046  |
| 1PE | C47 | 207 | 11.143 | 16.861 | 10.411 | 0.1331  | -0.1388 | 0.0185  |
| 1PE | C48 | 208 | 10.834 | 17.087 | 10.672 | 0.1448  | -0.1691 | 0.0890  |
| 1PE | C49 | 209 | 10.594 | 17.463 | 10.649 | 0.1729  | -0.1690 | 0.1447  |
| 1PE | C50 | 210 | 10.366 | 17.838 | 10.584 | 0.1573  | -0.1592 | 0.2069  |
| 1PE | C51 | 211 | 9.927  | 17.842 | 10.575 | 0.1536  | -0.1698 | 0.2443  |
| 1PE | C52 | 212 | 9.697  | 17.469 | 10.407 | 0.1368  | -0.1560 | 0.2245  |
| 1PE | C53 | 213 | 9.905  | 17.166 | 10.129 | 0.1013  | -0.1176 | 0.1688  |
| 1PE | C54 | 214 | 10.191 | 17.279 | 9.788  | 0.0729  | -0.0895 | 0.1628  |



|     |     |     |        |        |        |        |         |         |
|-----|-----|-----|--------|--------|--------|--------|---------|---------|
| 1PE | C55 | 215 | 10.330 | 17.046 | 9.446  | 0.0514 | -0.0627 | 0.1313  |
| 1PE | C56 | 216 | 10.270 | 16.618 | 9.403  | 0.0339 | -0.0554 | 0.0914  |
| 1PE | C57 | 217 | 10.124 | 16.382 | 9.789  | 0.0865 | -0.0811 | 0.0726  |
| 1PE | C58 | 218 | 10.356 | 16.407 | 10.155 | 0.1197 | -0.1300 | 0.0723  |
| 1PE | C59 | 219 | 10.774 | 16.617 | 10.157 | 0.1112 | -0.1294 | 0.0410  |
| 1PE | C60 | 220 | 11.104 | 16.622 | 9.835  | 0.0971 | -0.0760 | 0.0028  |
| 1PE | C61 | 221 | 11.483 | 16.643 | 9.602  | 0.0731 | -0.0571 | -0.0401 |
| 1PE | C62 | 222 | 11.919 | 16.668 | 9.544  | 0.0498 | -0.0454 | -0.0660 |
| 1PE | C63 | 223 | 12.353 | 16.729 | 9.684  | 0.0750 | -0.0520 | -0.1247 |
| 1PE | C64 | 224 | 12.681 | 16.978 | 9.814  | 0.0846 | -0.0740 | -0.1133 |
| 1PE | C65 | 225 | 12.861 | 17.306 | 9.620  | 0.0635 | -0.0480 | -0.1094 |
| 1PE | C66 | 226 | 12.666 | 17.509 | 9.303  | 0.0231 | -0.0254 | -0.0559 |
| 1PE | C67 | 227 | 12.246 | 17.532 | 9.169  | 0.0145 | -0.0192 | -0.0425 |
| 1PE | C68 | 228 | 11.847 | 17.326 | 9.174  | 0.0187 | -0.0247 | -0.0013 |
| 1PE | C69 | 229 | 11.514 | 17.035 | 9.209  | 0.0167 | -0.0275 | 0.0129  |
| 1PE | C70 | 230 | 11.174 | 16.758 | 9.223  | 0.0149 | -0.0328 | 0.0120  |
| 1PE | C71 | 231 | 11.057 | 16.375 | 9.388  | 0.0445 | -0.0428 | -0.0078 |
| 1PE | C72 | 232 | 11.231 | 16.107 | 9.671  | 0.0837 | -0.0531 | -0.0547 |
| 1PE | C73 | 233 | 11.404 | 15.938 | 10.029 | 0.1181 | -0.1104 | -0.0697 |
| 1PE | C74 | 234 | 11.208 | 15.888 | 10.442 | 0.1580 | -0.1469 | -0.0816 |
| 1PE | C75 | 235 | 10.789 | 15.751 | 10.469 | 0.1528 | -0.1565 | -0.0397 |
| 1PE | C76 | 236 | 10.469 | 15.789 | 10.140 | 0.1312 | -0.1180 | -0.0084 |
| 1PE | C77 | 237 | 10.106 | 15.834 | 9.857  | 0.1027 | -0.0903 | 0.0368  |
| 1PE | C78 | 238 | 9.752  | 16.051 | 9.695  | 0.0850 | -0.0724 | 0.0803  |
| 1PE | C79 | 239 | 9.553  | 16.446 | 9.777  | 0.0865 | -0.1010 | 0.1387  |
| 1PE | C80 | 240 | 9.465  | 16.864 | 9.873  | 0.0898 | -0.0948 | 0.2045  |
| 1PE | C1  | 241 | 11.307 | 17.128 | 12.840 | 0.3751 | -0.3729 | 0.0444  |
| 1PE | C2  | 242 | 11.537 | 16.842 | 12.573 | 0.3621 | -0.3511 | -0.0070 |
| 1PE | C3  | 243 | 11.830 | 16.698 | 12.240 | 0.3269 | -0.3006 | -0.0500 |
| 1PE | C4  | 244 | 12.047 | 16.587 | 11.842 | 0.2986 | -0.2760 | -0.0772 |
| 1PE | C5  | 245 | 11.969 | 16.232 | 11.562 | 0.2621 | -0.2452 | -0.1232 |
| 1PE | C6  | 246 | 11.651 | 15.898 | 11.648 | 0.2600 | -0.2432 | -0.1058 |
| 1PE | C7  | 247 | 11.281 | 15.973 | 11.926 | 0.3124 | -0.2733 | -0.0712 |
| 1PE | C8  | 248 | 11.175 | 16.313 | 12.227 | 0.3285 | -0.3092 | -0.0283 |
| 1PE | C9  | 249 | 11.034 | 16.657 | 12.531 | 0.3549 | -0.3448 | 0.0127  |
| 1PE | C10 | 250 | 10.806 | 16.997 | 12.759 | 0.3737 | -0.3488 | 0.0734  |
| 1PE | C11 | 251 | 10.362 | 17.116 | 12.778 | 0.3702 | -0.3729 | 0.1258  |
| 1PE | C12 | 252 | 10.041 | 17.102 | 12.459 | 0.3297 | -0.3442 | 0.1600  |
| 1PE | C13 | 253 | 9.891  | 16.934 | 12.066 | 0.3187 | -0.2993 | 0.1602  |
| 1PE | C14 | 254 | 9.884  | 16.678 | 11.697 | 0.2775 | -0.2865 | 0.1401  |
| 1PE | C15 | 255 | 9.854  | 16.251 | 11.589 | 0.2688 | -0.2676 | 0.1028  |
| 1PE | C16 | 256 | 9.723  | 15.985 | 11.233 | 0.2426 | -0.2222 | 0.0828  |
| 1PE | C17 | 257 | 9.708  | 16.113 | 10.783 | 0.1881 | -0.1890 | 0.0862  |
| 1PE | C18 | 258 | 9.626  | 16.547 | 10.657 | 0.1818 | -0.1813 | 0.1599  |
| 1PE | C19 | 259 | 9.428  | 16.832 | 10.963 | 0.1927 | -0.2020 | 0.1872  |
| 1PE | C20 | 260 | 9.380  | 16.742 | 11.424 | 0.2366 | -0.2606 | 0.1972  |
| 1PE | C21 | 261 | 9.405  | 16.699 | 11.885 | 0.2960 | -0.2909 | 0.1865  |
| 1PE | C22 | 262 | 9.690  | 16.478 | 12.165 | 0.3134 | -0.3254 | 0.1232  |
| 1PE | C23 | 263 | 10.138 | 16.445 | 12.077 | 0.3185 | -0.3034 | 0.0952  |
| 1PE | C24 | 264 | 10.356 | 16.783 | 11.894 | 0.2927 | -0.2832 | 0.0906  |
| 1PE | C25 | 265 | 10.306 | 17.232 | 12.004 | 0.2867 | -0.2948 | 0.1318  |
| 1PE | C26 | 266 | 10.152 | 17.558 | 12.285 | 0.3127 | -0.3189 | 0.2071  |
| 1PE | C27 | 267 | 10.092 | 17.975 | 12.457 | 0.3311 | -0.3411 | 0.2473  |
| 1PE | C28 | 268 | 9.804  | 18.248 | 12.682 | 0.3399 | -0.3720 | 0.2974  |
| 1PE | C29 | 269 | 9.381  | 18.350 | 12.524 | 0.3431 | -0.3637 | 0.3536  |
| 1PE | C30 | 270 | 9.221  | 18.082 | 12.176 | 0.3093 | -0.3303 | 0.3334  |
| 1PE | C31 | 271 | 9.364  | 17.659 | 12.145 | 0.3084 | -0.3275 | 0.2947  |
| 1PE | C32 | 272 | 9.662  | 17.456 | 12.431 | 0.3331 | -0.3526 | 0.2174  |
| 1PE | C33 | 273 | 9.955  | 17.567 | 12.765 | 0.3706 | -0.3720 | 0.2257  |
| 1PE | C34 | 274 | 10.402 | 17.618 | 12.714 | 0.3734 | -0.3595 | 0.1718  |
| 1PE | C35 | 275 | 10.613 | 17.356 | 12.399 | 0.3352 | -0.3383 | 0.1347  |
| 1PE | C36 | 276 | 10.537 | 16.916 | 12.345 | 0.3329 | -0.3278 | 0.0952  |
| 1PE | C37 | 277 | 10.291 | 16.632 | 12.553 | 0.3649 | -0.3630 | 0.1016  |
| 1PE | C38 | 278 | 9.855  | 16.651 | 12.629 | 0.3624 | -0.3649 | 0.1391  |
| 1PE | C39 | 279 | 9.546  | 16.926 | 12.465 | 0.3519 | -0.3514 | 0.2067  |
| 1PE | C40 | 280 | 9.391  | 17.152 | 12.125 | 0.3046 | -0.3281 | 0.2350  |
| 1PE | C41 | 281 | 9.115  | 17.311 | 11.806 | 0.2814 | -0.2909 | 0.2733  |
| 1PE | C42 | 282 | 8.910  | 17.443 | 11.420 | 0.2350 | -0.2635 | 0.2999  |
| 1PE | C43 | 283 | 8.949  | 17.328 | 10.976 | 0.1904 | -0.2223 | 0.2806  |
| 1PE | C44 | 284 | 9.351  | 17.306 | 10.760 | 0.1792 | -0.1914 | 0.2506  |
| 1PE | C45 | 285 | 9.761  | 17.396 | 10.961 | 0.2006 | -0.2032 | 0.2227  |
| 1PE | C46 | 286 | 9.801  | 17.543 | 11.392 | 0.2375 | -0.2550 | 0.2232  |
| 1PE | C47 | 287 | 9.476  | 17.621 | 11.661 | 0.2619 | -0.2819 | 0.2770  |

|     |     |     |        |        |        |         |         |         |
|-----|-----|-----|--------|--------|--------|---------|---------|---------|
| 1PE | C48 | 288 | 9.108  | 17.852 | 11.691 | 0.2656  | -0.2816 | 0.3261  |
| 1PE | C49 | 289 | 9.091  | 18.308 | 11.709 | 0.2528  | -0.2702 | 0.3782  |
| 1PE | C50 | 290 | 9.375  | 18.522 | 11.988 | 0.2792  | -0.3205 | 0.3556  |
| 1PE | C51 | 291 | 9.744  | 18.341 | 12.184 | 0.3059  | -0.3183 | 0.3022  |
| 1PE | C52 | 292 | 10.113 | 18.486 | 12.331 | 0.3356  | -0.3388 | 0.2773  |
| 1PE | C53 | 293 | 10.202 | 18.938 | 12.373 | 0.3214  | -0.3294 | 0.3210  |
| 1PE | C54 | 294 | 10.144 | 19.200 | 11.992 | 0.2680  | -0.2914 | 0.3658  |
| 1PE | C55 | 295 | 9.952  | 18.975 | 11.639 | 0.2358  | -0.2611 | 0.3419  |
| 1PE | C56 | 296 | 9.826  | 18.540 | 11.727 | 0.2534  | -0.2581 | 0.3413  |
| 1PE | C57 | 297 | 10.164 | 18.232 | 11.894 | 0.2780  | -0.2790 | 0.2399  |
| 1PE | C58 | 298 | 10.567 | 18.383 | 12.136 | 0.2963  | -0.2972 | 0.2350  |
| 1PE | C59 | 299 | 10.556 | 18.592 | 12.561 | 0.3451  | -0.3484 | 0.2468  |
| 1PE | C60 | 300 | 10.147 | 18.654 | 12.804 | 0.3637  | -0.3784 | 0.3003  |
| 1PE | C61 | 301 | 9.759  | 18.750 | 12.564 | 0.3476  | -0.3575 | 0.3449  |
| 1PE | C62 | 302 | 9.735  | 18.865 | 12.123 | 0.3048  | -0.3085 | 0.3584  |
| 1PE | C63 | 303 | 9.472  | 18.954 | 11.750 | 0.2574  | -0.2750 | 0.3883  |
| 1PE | C64 | 304 | 9.183  | 18.793 | 11.450 | 0.2238  | -0.2484 | 0.4149  |
| 1PE | C65 | 305 | 9.033  | 18.451 | 11.215 | 0.1980  | -0.2302 | 0.3869  |
| 1PE | C66 | 306 | 8.993  | 18.007 | 11.220 | 0.2259  | -0.2484 | 0.3568  |
| 1PE | C67 | 307 | 9.279  | 17.656 | 11.143 | 0.2079  | -0.2256 | 0.2954  |
| 1PE | C68 | 308 | 9.384  | 17.252 | 11.290 | 0.2354  | -0.2198 | 0.2403  |
| 1PE | C69 | 309 | 9.594  | 17.134 | 11.672 | 0.2703  | -0.2663 | 0.2230  |
| 1PE | C70 | 310 | 9.835  | 17.406 | 11.941 | 0.2969  | -0.2964 | 0.2261  |
| 1PE | C71 | 311 | 9.810  | 17.849 | 12.021 | 0.2976  | -0.3085 | 0.2494  |
| 1PE | C72 | 312 | 9.570  | 18.108 | 11.778 | 0.2720  | -0.2808 | 0.2974  |
| 1PE | C73 | 313 | 9.467  | 18.042 | 11.381 | 0.2363  | -0.2351 | 0.3078  |
| 1PE | C74 | 314 | 9.733  | 17.886 | 11.031 | 0.2074  | -0.2108 | 0.2679  |
| 1PE | C75 | 315 | 10.157 | 17.714 | 11.043 | 0.2029  | -0.2070 | 0.1971  |
| 1PE | C76 | 316 | 10.310 | 17.571 | 11.415 | 0.2238  | -0.2429 | 0.1811  |
| 1PE | C77 | 317 | 10.251 | 17.726 | 11.807 | 0.2811  | -0.2965 | 0.2063  |
| 1PE | C78 | 318 | 10.491 | 17.888 | 12.145 | 0.2969  | -0.3061 | 0.2040  |
| 1PE | C79 | 319 | 10.775 | 17.847 | 12.468 | 0.3356  | -0.3357 | 0.1601  |
| 1PE | C80 | 320 | 10.990 | 17.526 | 12.707 | 0.3800  | -0.3562 | 0.0963  |
| 1PE | C1  | 321 | 13.161 | 14.418 | 7.291  | -0.1688 | 0.1915  | -0.4191 |
| 1PE | C2  | 322 | 13.535 | 14.692 | 7.240  | -0.1486 | 0.1882  | -0.4279 |
| 1PE | C3  | 323 | 13.680 | 15.107 | 7.093  | -0.1516 | 0.2051  | -0.3888 |
| 1PE | C4  | 324 | 13.504 | 15.466 | 6.915  | -0.1934 | 0.2010  | -0.3399 |
| 1PE | C5  | 325 | 13.210 | 15.776 | 7.064  | -0.1768 | 0.2002  | -0.2811 |
| 1PE | C6  | 326 | 13.040 | 15.763 | 7.460  | -0.1312 | 0.1468  | -0.2893 |
| 1PE | C7  | 327 | 13.157 | 15.747 | 7.856  | -0.0938 | 0.1325  | -0.2747 |
| 1PE | C8  | 328 | 13.068 | 15.615 | 8.251  | -0.0607 | 0.0840  | -0.2906 |
| 1PE | C9  | 329 | 12.873 | 15.258 | 8.414  | -0.0427 | 0.0743  | -0.2935 |
| 1PE | C10 | 330 | 12.774 | 14.805 | 8.485  | -0.0208 | 0.0574  | -0.3391 |
| 1PE | C11 | 331 | 12.851 | 14.366 | 8.596  | -0.0084 | 0.0550  | -0.3768 |
| 1PE | C12 | 332 | 12.874 | 14.184 | 9.019  | 0.0376  | 0.0103  | -0.3917 |
| 1PE | C13 | 333 | 12.946 | 14.452 | 9.386  | 0.0486  | -0.0197 | -0.3807 |
| 1PE | C14 | 334 | 13.049 | 14.888 | 9.367  | 0.0604  | -0.0355 | -0.3432 |
| 1PE | C15 | 335 | 12.915 | 15.298 | 9.316  | 0.0651  | -0.0134 | -0.3147 |
| 1PE | C16 | 336 | 12.648 | 15.562 | 9.071  | 0.0347  | -0.0034 | -0.2503 |
| 1PE | C17 | 337 | 12.225 | 15.668 | 9.004  | 0.0264  | 0.0014  | -0.1982 |
| 1PE | C18 | 338 | 11.810 | 15.652 | 9.179  | 0.0371  | -0.0133 | -0.1473 |
| 1PE | C19 | 339 | 11.518 | 15.675 | 9.523  | 0.0749  | -0.0582 | -0.1177 |
| 1PE | C20 | 340 | 11.262 | 15.461 | 9.800  | 0.0964  | -0.0913 | -0.1247 |
| 1PE | C21 | 341 | 11.355 | 15.137 | 10.100 | 0.1313  | -0.1207 | -0.1626 |
| 1PE | C22 | 342 | 11.695 | 15.138 | 10.410 | 0.1639  | -0.1330 | -0.1795 |
| 1PE | C23 | 343 | 12.099 | 15.336 | 10.341 | 0.1537  | -0.1317 | -0.2164 |
| 1PE | C24 | 344 | 12.216 | 15.485 | 9.952  | 0.1134  | -0.0932 | -0.2070 |
| 1PE | C25 | 345 | 12.024 | 15.291 | 9.558  | 0.0768  | -0.0562 | -0.2080 |
| 1PE | C26 | 346 | 12.018 | 14.855 | 9.463  | 0.0571  | -0.0545 | -0.2517 |
| 1PE | C27 | 347 | 12.184 | 14.536 | 9.753  | 0.0951  | -0.0692 | -0.3011 |
| 1PE | C28 | 348 | 12.623 | 14.569 | 9.922  | 0.1169  | -0.0729 | -0.3387 |
| 1PE | C29 | 349 | 12.846 | 14.956 | 9.846  | 0.1098  | -0.0804 | -0.3375 |
| 1PE | C30 | 350 | 12.635 | 15.328 | 9.721  | 0.0937  | -0.0720 | -0.2770 |
| 1PE | C31 | 351 | 12.385 | 15.590 | 9.483  | 0.0654  | -0.0300 | -0.2137 |
| 1PE | C32 | 352 | 12.023 | 15.797 | 9.596  | 0.0842  | -0.0521 | -0.1608 |
| 1PE | C33 | 353 | 11.916 | 15.960 | 10.002 | 0.1068  | -0.0973 | -0.1319 |
| 1PE | C34 | 354 | 12.142 | 15.840 | 10.356 | 0.1414  | -0.1239 | -0.1564 |
| 1PE | C35 | 355 | 12.561 | 15.706 | 10.351 | 0.1385  | -0.1209 | -0.2069 |
| 1PE | C36 | 356 | 12.905 | 15.639 | 10.048 | 0.1154  | -0.0954 | -0.2712 |
| 1PE | C37 | 357 | 13.138 | 15.374 | 9.765  | 0.0998  | -0.0480 | -0.2984 |
| 1PE | C38 | 358 | 13.418 | 15.237 | 9.455  | 0.0584  | -0.0295 | -0.3586 |
| 1PE | C39 | 359 | 13.626 | 14.942 | 9.183  | 0.0434  | -0.0089 | -0.4262 |
| 1PE | C40 | 360 | 13.623 | 14.671 | 8.812  | 0.0066  | 0.0422  | -0.4262 |

|     |     |     |        |        |        |         |         |         |
|-----|-----|-----|--------|--------|--------|---------|---------|---------|
| 1PE | C41 | 361 | 13.454 | 14.451 | 8.442  | -0.0377 | 0.0714  | -0.4403 |
| 1PE | C42 | 362 | 13.110 | 14.539 | 8.170  | -0.0663 | 0.0848  | -0.4101 |
| 1PE | C43 | 363 | 12.985 | 14.949 | 8.048  | -0.0720 | 0.1010  | -0.3374 |
| 1PE | C44 | 364 | 13.208 | 15.218 | 7.782  | -0.0905 | 0.1317  | -0.3442 |
| 1PE | C45 | 365 | 13.589 | 15.080 | 7.580  | -0.1359 | 0.1526  | -0.3892 |
| 1PE | C46 | 366 | 13.821 | 14.702 | 7.684  | -0.1133 | 0.1515  | -0.4406 |
| 1PE | C47 | 367 | 13.625 | 14.348 | 7.892  | -0.0930 | 0.1205  | -0.4625 |
| 1PE | C48 | 368 | 13.219 | 14.191 | 7.772  | -0.0973 | 0.1287  | -0.4311 |
| 1PE | C49 | 369 | 12.846 | 14.428 | 7.722  | -0.0818 | 0.1300  | -0.3654 |
| 1PE | C50 | 370 | 12.601 | 14.597 | 8.051  | -0.0824 | 0.0956  | -0.3499 |
| 1PE | C51 | 371 | 12.385 | 14.431 | 8.427  | -0.0334 | 0.0574  | -0.3217 |
| 1PE | C52 | 372 | 12.370 | 14.275 | 8.863  | 0.0084  | 0.0148  | -0.3287 |
| 1PE | C53 | 373 | 12.423 | 14.382 | 9.319  | 0.0496  | -0.0366 | -0.3281 |
| 1PE | C54 | 374 | 12.537 | 14.796 | 9.476  | 0.0891  | -0.0343 | -0.3103 |
| 1PE | C55 | 375 | 12.439 | 15.140 | 9.246  | 0.0476  | -0.0241 | -0.2789 |
| 1PE | C56 | 376 | 12.066 | 15.206 | 9.036  | 0.0125  | -0.0056 | -0.2266 |
| 1PE | C57 | 377 | 11.661 | 15.168 | 9.202  | 0.0279  | -0.0193 | -0.1937 |
| 1PE | C58 | 378 | 11.572 | 15.092 | 9.632  | 0.0760  | -0.0655 | -0.1796 |
| 1PE | C59 | 379 | 11.871 | 14.968 | 9.941  | 0.1149  | -0.0843 | -0.2209 |
| 1PE | C60 | 380 | 12.306 | 14.997 | 9.975  | 0.1145  | -0.0949 | -0.2716 |
| 1PE | C61 | 381 | 12.617 | 15.208 | 10.220 | 0.1413  | -0.1043 | -0.2883 |
| 1PE | C62 | 382 | 13.050 | 15.240 | 10.309 | 0.1537  | -0.0997 | -0.3120 |
| 1PE | C63 | 383 | 13.426 | 15.435 | 10.174 | 0.1452  | -0.0899 | -0.3383 |
| 1PE | C64 | 384 | 13.697 | 15.467 | 9.827  | 0.0920  | -0.0603 | -0.3576 |
| 1PE | C65 | 385 | 13.920 | 15.353 | 9.443  | 0.0529  | -0.0406 | -0.3992 |
| 1PE | C66 | 386 | 14.118 | 15.070 | 9.135  | 0.0275  | 0.0126  | -0.4567 |
| 1PE | C67 | 387 | 14.067 | 14.884 | 8.725  | -0.0008 | 0.0557  | -0.4421 |
| 1PE | C68 | 388 | 13.801 | 14.874 | 8.362  | -0.0503 | 0.0861  | -0.4289 |
| 1PE | C69 | 389 | 13.502 | 14.831 | 8.044  | -0.0690 | 0.0915  | -0.3943 |
| 1PE | C70 | 390 | 13.275 | 14.702 | 7.700  | -0.1094 | 0.1299  | -0.3838 |
| 1PE | C71 | 391 | 13.101 | 14.920 | 7.364  | -0.1449 | 0.1693  | -0.3409 |
| 1PE | C72 | 392 | 13.187 | 15.308 | 7.257  | -0.1571 | 0.1781  | -0.3318 |
| 1PE | C73 | 393 | 13.508 | 15.548 | 7.441  | -0.1419 | 0.1685  | -0.3475 |
| 1PE | C74 | 394 | 13.612 | 15.509 | 7.864  | -0.1096 | 0.1229  | -0.3445 |
| 1PE | C75 | 395 | 13.442 | 15.279 | 8.245  | -0.0443 | 0.0957  | -0.3538 |
| 1PE | C76 | 396 | 13.278 | 14.932 | 8.494  | -0.0176 | 0.0664  | -0.3647 |
| 1PE | C77 | 397 | 13.118 | 14.694 | 8.862  | 0.0092  | 0.0269  | -0.3797 |
| 1PE | C78 | 398 | 12.692 | 14.661 | 9.005  | 0.0291  | 0.0104  | -0.3355 |
| 1PE | C79 | 399 | 12.343 | 14.798 | 8.773  | -0.0092 | 0.0318  | -0.2829 |
| 1PE | C80 | 400 | 12.301 | 14.915 | 8.317  | -0.0610 | 0.0573  | -0.2720 |
| 1PE | C1  | 401 | 11.412 | 17.499 | 8.940  | -0.0093 | 0.0029  | 0.0739  |
| 1PE | C2  | 402 | 11.539 | 17.561 | 8.487  | -0.0479 | 0.0514  | 0.0374  |
| 1PE | C3  | 403 | 11.893 | 17.761 | 8.263  | -0.0987 | 0.0744  | 0.0437  |
| 1PE | C4  | 404 | 12.156 | 17.935 | 7.962  | -0.1164 | 0.1027  | 0.0289  |
| 1PE | C5  | 405 | 12.196 | 18.348 | 7.820  | -0.1404 | 0.1216  | 0.0708  |
| 1PE | C6  | 406 | 12.009 | 18.701 | 8.032  | -0.1074 | 0.0935  | 0.1003  |
| 1PE | C7  | 407 | 11.710 | 18.738 | 8.378  | -0.0709 | 0.0588  | 0.1558  |
| 1PE | C8  | 408 | 11.588 | 18.898 | 8.805  | -0.0326 | 0.0077  | 0.1891  |
| 1PE | C9  | 409 | 11.634 | 18.858 | 9.245  | 0.0086  | -0.0080 | 0.1675  |
| 1PE | C10 | 410 | 11.827 | 18.627 | 9.594  | 0.0438  | -0.0658 | 0.1306  |
| 1PE | C11 | 411 | 12.204 | 18.431 | 9.734  | 0.0704  | -0.0747 | 0.0697  |
| 1PE | C12 | 412 | 12.600 | 18.214 | 9.743  | 0.0666  | -0.0527 | 0.0194  |
| 1PE | C13 | 413 | 12.701 | 17.780 | 9.772  | 0.0794  | -0.0572 | -0.0450 |
| 1PE | C14 | 414 | 12.415 | 17.441 | 9.794  | 0.0798  | -0.0534 | -0.0360 |
| 1PE | C15 | 415 | 12.206 | 17.182 | 10.072 | 0.1081  | -0.1093 | -0.0610 |
| 1PE | C16 | 416 | 11.790 | 17.205 | 10.240 | 0.1323  | -0.1128 | -0.0076 |
| 1PE | C17 | 417 | 11.473 | 17.445 | 10.068 | 0.0894  | -0.1029 | 0.0609  |
| 1PE | C18 | 418 | 11.538 | 17.830 | 9.840  | 0.0843  | -0.0744 | 0.0928  |
| 1PE | C19 | 419 | 11.807 | 18.115 | 9.610  | 0.0536  | -0.0497 | 0.0890  |
| 1PE | C20 | 420 | 12.091 | 18.229 | 9.270  | 0.0157  | -0.0241 | 0.0605  |
| 1PE | C21 | 421 | 12.118 | 18.053 | 8.864  | -0.0221 | 0.0243  | 0.0431  |
| 1PE | C22 | 422 | 11.692 | 18.016 | 8.633  | -0.0581 | 0.0439  | 0.0838  |
| 1PE | C23 | 423 | 11.324 | 18.236 | 8.734  | -0.0397 | 0.0280  | 0.1394  |
| 1PE | C24 | 424 | 11.131 | 18.162 | 9.133  | 0.0194  | -0.0263 | 0.1516  |
| 1PE | C25 | 425 | 11.388 | 17.935 | 9.372  | 0.0185  | -0.0425 | 0.1037  |
| 1PE | C26 | 426 | 11.771 | 17.820 | 9.169  | 0.0133  | -0.0233 | 0.0550  |
| 1PE | C27 | 427 | 11.928 | 17.604 | 8.783  | -0.0228 | 0.0256  | 0.0207  |
| 1PE | C28 | 428 | 12.333 | 17.600 | 8.636  | -0.0384 | 0.0263  | -0.0284 |
| 1PE | C29 | 429 | 12.634 | 17.798 | 8.873  | -0.0134 | 0.0178  | -0.0428 |
| 1PE | C30 | 430 | 12.550 | 17.984 | 9.271  | 0.0177  | -0.0209 | 0.0109  |
| 1PE | C31 | 431 | 12.248 | 17.862 | 9.564  | 0.0363  | -0.0521 | 0.0166  |
| 1PE | C32 | 432 | 11.918 | 17.592 | 9.597  | 0.0638  | -0.0687 | 0.0200  |
| 1PE | C33 | 433 | 11.514 | 17.442 | 9.519  | 0.0428  | -0.0383 | 0.0545  |

|     |     |     |        |        |        |         |         |         |
|-----|-----|-----|--------|--------|--------|---------|---------|---------|
| 1PE | C34 | 434 | 11.219 | 17.115 | 9.635  | 0.0518  | -0.0572 | 0.0633  |
| 1PE | C35 | 435 | 10.948 | 17.099 | 9.993  | 0.0961  | -0.1140 | 0.0682  |
| 1PE | C36 | 436 | 10.951 | 17.405 | 10.304 | 0.1281  | -0.1307 | 0.0915  |
| 1PE | C37 | 437 | 11.270 | 17.500 | 10.577 | 0.1700  | -0.1478 | 0.0649  |
| 1PE | C38 | 438 | 11.671 | 17.698 | 10.492 | 0.1385  | -0.1412 | 0.0577  |
| 1PE | C39 | 439 | 11.762 | 18.102 | 10.304 | 0.1158  | -0.1247 | 0.0912  |
| 1PE | C40 | 440 | 11.531 | 18.298 | 9.987  | 0.0838  | -0.0980 | 0.1286  |
| 1PE | C41 | 441 | 11.121 | 18.168 | 9.860  | 0.0764  | -0.0946 | 0.1560  |
| 1PE | C42 | 442 | 10.735 | 18.357 | 9.966  | 0.0934  | -0.0948 | 0.2130  |
| 1PE | C43 | 443 | 10.665 | 18.697 | 10.267 | 0.1046  | -0.1229 | 0.2459  |
| 1PE | C44 | 444 | 10.844 | 18.774 | 10.699 | 0.1618  | -0.1694 | 0.2483  |
| 1PE | C45 | 445 | 11.239 | 18.936 | 10.806 | 0.1683  | -0.1688 | 0.2122  |
| 1PE | C46 | 446 | 11.605 | 18.929 | 10.538 | 0.1283  | -0.1333 | 0.1628  |
| 1PE | C47 | 447 | 11.648 | 18.819 | 10.102 | 0.0950  | -0.1032 | 0.1718  |
| 1PE | C48 | 448 | 11.475 | 18.979 | 9.727  | 0.0636  | -0.0663 | 0.1908  |
| 1PE | C49 | 449 | 11.168 | 18.872 | 9.432  | 0.0436  | -0.0445 | 0.2235  |
| 1PE | C50 | 450 | 11.179 | 18.661 | 9.037  | -0.0232 | -0.0127 | 0.1894  |
| 1PE | C51 | 451 | 11.216 | 18.684 | 8.570  | -0.0628 | 0.0334  | 0.1872  |
| 1PE | C52 | 452 | 11.312 | 18.494 | 8.144  | -0.1056 | 0.0793  | 0.1690  |
| 1PE | C53 | 453 | 11.686 | 18.266 | 8.016  | -0.1084 | 0.0930  | 0.0947  |
| 1PE | C54 | 454 | 11.988 | 18.277 | 8.334  | -0.0757 | 0.0673  | 0.0597  |
| 1PE | C55 | 455 | 11.870 | 18.461 | 8.770  | -0.0479 | 0.0155  | 0.0986  |
| 1PE | C56 | 456 | 11.615 | 18.359 | 9.140  | -0.0149 | -0.0193 | 0.1155  |
| 1PE | C57 | 457 | 11.371 | 18.430 | 9.520  | 0.0303  | -0.0575 | 0.1447  |
| 1PE | C58 | 458 | 11.143 | 18.656 | 9.894  | 0.0760  | -0.0984 | 0.2086  |
| 1PE | C59 | 459 | 11.136 | 18.946 | 10.234 | 0.1130  | -0.1216 | 0.2247  |
| 1PE | C60 | 460 | 10.963 | 19.259 | 10.489 | 0.1382  | -0.1412 | 0.2864  |
| 1PE | C61 | 461 | 10.794 | 19.307 | 10.907 | 0.1806  | -0.1807 | 0.3004  |
| 1PE | C62 | 462 | 10.859 | 19.040 | 11.251 | 0.1853  | -0.2159 | 0.2512  |
| 1PE | C63 | 463 | 11.079 | 18.672 | 11.225 | 0.2031  | -0.2174 | 0.2037  |
| 1PE | C64 | 464 | 11.189 | 18.414 | 10.892 | 0.1824  | -0.1839 | 0.1946  |
| 1PE | C65 | 465 | 11.353 | 18.078 | 10.637 | 0.1630  | -0.1585 | 0.1229  |
| 1PE | C66 | 466 | 11.258 | 17.881 | 10.251 | 0.1140  | -0.1113 | 0.1033  |
| 1PE | C67 | 467 | 11.057 | 17.675 | 9.879  | 0.0868  | -0.0953 | 0.1180  |
| 1PE | C68 | 468 | 11.052 | 17.571 | 9.456  | 0.0398  | -0.0450 | 0.0916  |
| 1PE | C69 | 469 | 11.014 | 17.244 | 9.167  | 0.0160  | -0.0304 | 0.0843  |
| 1PE | C70 | 470 | 11.156 | 17.032 | 8.803  | -0.0139 | 0.0007  | 0.0452  |
| 1PE | C71 | 471 | 11.369 | 17.072 | 8.409  | -0.0566 | 0.0526  | 0.0177  |
| 1PE | C72 | 472 | 11.605 | 17.231 | 8.082  | -0.0790 | 0.0789  | 0.0115  |
| 1PE | C73 | 473 | 11.920 | 17.423 | 7.889  | -0.1075 | 0.1108  | 0.0032  |
| 1PE | C74 | 474 | 12.180 | 17.497 | 7.556  | -0.1456 | 0.1434  | -0.0189 |
| 1PE | C75 | 475 | 12.050 | 17.654 | 7.142  | -0.1958 | 0.1835  | 0.0122  |
| 1PE | C76 | 476 | 11.660 | 17.864 | 7.088  | -0.2085 | 0.1785  | 0.0736  |
| 1PE | C77 | 477 | 11.378 | 17.952 | 7.421  | -0.1605 | 0.1479  | 0.1031  |
| 1PE | C78 | 478 | 11.212 | 18.156 | 7.765  | -0.1311 | 0.1086  | 0.1607  |
| 1PE | C79 | 479 | 10.806 | 18.206 | 7.906  | -0.1170 | 0.1040  | 0.1791  |
| 1PE | C80 | 480 | 10.404 | 18.034 | 8.054  | -0.0924 | 0.0821  | 0.2183  |
| 1PE | C1  | 481 | 11.087 | 14.966 | 9.682  | 0.0906  | -0.0688 | -0.1434 |
| 1PE | C2  | 482 | 11.176 | 15.270 | 9.340  | 0.0426  | -0.0499 | -0.1342 |
| 1PE | C3  | 483 | 11.323 | 15.569 | 9.032  | 0.0335  | -0.0074 | -0.1136 |
| 1PE | C4  | 484 | 11.296 | 15.812 | 8.658  | -0.0105 | 0.0290  | -0.0941 |
| 1PE | C5  | 485 | 11.099 | 16.198 | 8.474  | -0.0445 | 0.0544  | -0.0340 |
| 1PE | C6  | 486 | 11.131 | 16.645 | 8.474  | -0.0396 | 0.0515  | 0.0132  |
| 1PE | C7  | 487 | 10.875 | 17.002 | 8.309  | -0.0694 | 0.0584  | 0.0621  |
| 1PE | C8  | 488 | 10.527 | 16.900 | 8.039  | -0.0961 | 0.0763  | 0.1015  |
| 1PE | C9  | 489 | 10.451 | 16.449 | 7.951  | -0.0986 | 0.0870  | 0.0662  |
| 1PE | C10 | 490 | 10.697 | 16.097 | 8.119  | -0.0821 | 0.0895  | 0.0233  |
| 1PE | C11 | 491 | 10.909 | 15.739 | 8.313  | -0.0614 | 0.0505  | -0.0592 |
| 1PE | C12 | 492 | 10.863 | 15.580 | 8.741  | -0.0188 | 0.0153  | -0.0650 |
| 1PE | C13 | 493 | 10.561 | 15.780 | 9.015  | 0.0255  | -0.0091 | -0.0119 |
| 1PE | C14 | 494 | 10.195 | 16.040 | 8.871  | -0.0014 | -0.0025 | 0.0479  |
| 1PE | C15 | 495 | 9.908  | 15.945 | 8.539  | -0.0509 | 0.0269  | 0.0637  |
| 1PE | C16 | 496 | 9.887  | 15.645 | 8.204  | -0.0618 | 0.0554  | 0.0394  |
| 1PE | C17 | 497 | 9.993  | 15.569 | 7.768  | -0.1021 | 0.0901  | 0.0241  |
| 1PE | C18 | 498 | 10.100 | 15.757 | 7.378  | -0.1496 | 0.1359  | 0.0161  |
| 1PE | C19 | 499 | 10.076 | 16.156 | 7.184  | -0.1613 | 0.1683  | 0.0691  |
| 1PE | C20 | 500 | 9.960  | 16.582 | 7.156  | -0.1851 | 0.1544  | 0.1238  |
| 1PE | C21 | 501 | 9.860  | 16.976 | 7.319  | -0.1594 | 0.1468  | 0.1707  |
| 1PE | C22 | 502 | 9.850  | 17.288 | 7.603  | -0.1367 | 0.1153  | 0.1950  |
| 1PE | C23 | 503 | 9.686  | 17.645 | 7.784  | -0.1283 | 0.0934  | 0.2319  |
| 1PE | C24 | 504 | 9.611  | 18.015 | 7.585  | -0.1527 | 0.1210  | 0.2771  |
| 1PE | C25 | 505 | 9.567  | 18.069 | 7.145  | -0.1950 | 0.1470  | 0.2990  |
| 1PE | C26 | 506 | 9.603  | 17.731 | 6.860  | -0.2304 | 0.1926  | 0.2700  |

|     |     |     |        |        |        |         |         |         |
|-----|-----|-----|--------|--------|--------|---------|---------|---------|
| 1PE | C27 | 507 | 9.750  | 17.319 | 6.935  | -0.2235 | 0.1825  | 0.2002  |
| 1PE | C28 | 508 | 9.999  | 16.971 | 6.821  | -0.1995 | 0.1966  | 0.1496  |
| 1PE | C29 | 509 | 10.043 | 16.569 | 6.640  | -0.2324 | 0.2072  | 0.1098  |
| 1PE | C30 | 510 | 9.786  | 16.233 | 6.780  | -0.2277 | 0.1998  | 0.0957  |
| 1PE | C31 | 511 | 9.546  | 16.295 | 7.171  | -0.1682 | 0.1568  | 0.1279  |
| 1PE | C32 | 512 | 9.437  | 16.695 | 7.367  | -0.1691 | 0.1263  | 0.1763  |
| 1PE | C33 | 513 | 9.350  | 17.137 | 7.309  | -0.1860 | 0.1273  | 0.2278  |
| 1PE | C34 | 514 | 9.475  | 17.563 | 7.335  | -0.1595 | 0.1268  | 0.2748  |
| 1PE | C35 | 515 | 9.894  | 17.676 | 7.284  | -0.1804 | 0.1512  | 0.2414  |
| 1PE | C36 | 516 | 10.198 | 17.368 | 7.199  | -0.1770 | 0.1677  | 0.1737  |
| 1PE | C37 | 517 | 10.348 | 16.926 | 7.175  | -0.1748 | 0.1587  | 0.1231  |
| 1PE | C38 | 518 | 10.459 | 16.548 | 6.934  | -0.2100 | 0.1963  | 0.0657  |
| 1PE | C39 | 519 | 10.348 | 16.141 | 6.746  | -0.2162 | 0.1993  | 0.0271  |
| 1PE | C40 | 520 | 10.044 | 15.800 | 6.817  | -0.1894 | 0.2037  | 0.0383  |
| 1PE | C41 | 521 | 9.686  | 15.806 | 7.108  | -0.1756 | 0.1460  | 0.0710  |
| 1PE | C42 | 522 | 9.652  | 15.955 | 7.555  | -0.1262 | 0.1220  | 0.0875  |
| 1PE | C43 | 523 | 9.703  | 16.088 | 8.007  | -0.0805 | 0.0734  | 0.1053  |
| 1PE | C44 | 524 | 9.665  | 16.383 | 8.350  | -0.0617 | 0.0396  | 0.1229  |
| 1PE | C45 | 525 | 9.649  | 16.819 | 8.471  | -0.0460 | 0.0338  | 0.1749  |
| 1PE | C46 | 526 | 10.014 | 17.045 | 8.542  | -0.0508 | 0.0197  | 0.1611  |
| 1PE | C47 | 527 | 10.433 | 16.827 | 8.528  | -0.0538 | 0.0206  | 0.0949  |
| 1PE | C48 | 528 | 10.659 | 16.486 | 8.442  | -0.0550 | 0.0390  | 0.0330  |
| 1PE | C49 | 529 | 10.642 | 16.087 | 8.626  | -0.0222 | 0.0217  | 0.0029  |
| 1PE | C50 | 530 | 10.414 | 15.728 | 8.519  | -0.0179 | 0.0498  | -0.0103 |
| 1PE | C51 | 531 | 10.391 | 15.570 | 8.117  | -0.0771 | 0.0637  | -0.0299 |
| 1PE | C52 | 532 | 10.455 | 15.771 | 7.730  | -0.1269 | 0.1094  | -0.0003 |
| 1PE | C53 | 533 | 10.507 | 16.074 | 7.442  | -0.1489 | 0.1362  | 0.0188  |
| 1PE | C54 | 534 | 10.379 | 16.484 | 7.422  | -0.1532 | 0.1536  | 0.0687  |
| 1PE | C55 | 535 | 10.164 | 16.780 | 7.695  | -0.1343 | 0.1059  | 0.1025  |
| 1PE | C56 | 536 | 10.050 | 16.713 | 8.159  | -0.0805 | 0.0771  | 0.1184  |
| 1PE | C57 | 537 | 10.183 | 16.344 | 8.386  | -0.0512 | 0.0417  | 0.0754  |
| 1PE | C58 | 538 | 10.209 | 16.027 | 8.120  | -0.0768 | 0.0619  | 0.0325  |
| 1PE | C59 | 539 | 10.097 | 16.145 | 7.709  | -0.1148 | 0.1244  | 0.0597  |
| 1PE | C60 | 540 | 9.796  | 16.461 | 7.632  | -0.1212 | 0.1214  | 0.1182  |
| 1PE | C61 | 541 | 9.653  | 16.873 | 7.815  | -0.1175 | 0.0908  | 0.1819  |
| 1PE | C62 | 542 | 9.370  | 17.255 | 7.820  | -0.1238 | 0.0846  | 0.2496  |
| 1PE | C63 | 543 | 9.226  | 17.687 | 7.961  | -0.1028 | 0.0633  | 0.2906  |
| 1PE | C64 | 544 | 9.335  | 18.143 | 7.991  | -0.1028 | 0.0676  | 0.3210  |
| 1PE | C65 | 545 | 9.624  | 18.458 | 7.798  | -0.1314 | 0.0996  | 0.3365  |
| 1PE | C66 | 546 | 9.891  | 18.418 | 7.407  | -0.1774 | 0.1231  | 0.3009  |
| 1PE | C67 | 547 | 10.071 | 18.134 | 7.094  | -0.1981 | 0.1587  | 0.2720  |
| 1PE | C68 | 548 | 10.118 | 17.773 | 6.834  | -0.2199 | 0.1886  | 0.2152  |
| 1PE | C69 | 549 | 10.249 | 17.385 | 6.685  | -0.2434 | 0.2059  | 0.1768  |
| 1PE | C70 | 550 | 10.465 | 16.992 | 6.629  | -0.2430 | 0.2042  | 0.1185  |
| 1PE | C71 | 551 | 10.643 | 16.683 | 6.361  | -0.2591 | 0.2553  | 0.0580  |
| 1PE | C72 | 552 | 10.863 | 16.432 | 6.062  | -0.2849 | 0.2720  | 0.0212  |
| 1PE | C73 | 553 | 11.238 | 16.242 | 5.893  | -0.2916 | 0.2783  | -0.0419 |
| 1PE | C74 | 554 | 11.612 | 16.097 | 5.685  | -0.3403 | 0.3075  | -0.0839 |
| 1PE | C75 | 555 | 12.046 | 15.981 | 5.537  | -0.3415 | 0.3403  | -0.1510 |
| 1PE | C76 | 556 | 12.440 | 15.726 | 5.484  | -0.3292 | 0.3414  | -0.2037 |
| 1PE | C77 | 557 | 12.772 | 15.509 | 5.731  | -0.3168 | 0.3215  | -0.2735 |
| 1PE | C78 | 558 | 12.954 | 15.216 | 6.042  | -0.2783 | 0.2868  | -0.3093 |
| 1PE | C79 | 559 | 13.079 | 15.018 | 6.441  | -0.2337 | 0.2644  | -0.3308 |
| 1PE | C80 | 560 | 13.233 | 14.960 | 6.870  | -0.1897 | 0.2144  | -0.3733 |
| 1PE | C1  | 561 | 11.728 | 15.473 | 9.965  | 0.0902  | -0.0957 | -0.1621 |
| 1PE | C2  | 562 | 11.657 | 15.652 | 10.362 | 0.1629  | -0.1328 | -0.1571 |
| 1PE | C3  | 563 | 11.661 | 16.094 | 10.491 | 0.1533  | -0.1335 | -0.0953 |
| 1PE | C4  | 564 | 12.005 | 16.359 | 10.384 | 0.1483  | -0.1264 | -0.1085 |
| 1PE | C5  | 565 | 12.359 | 16.225 | 10.111 | 0.1072  | -0.0811 | -0.1467 |
| 1PE | C6  | 566 | 12.510 | 15.876 | 9.865  | 0.0953  | -0.0864 | -0.2106 |
| 1PE | C7  | 567 | 12.844 | 15.766 | 9.529  | 0.0633  | -0.0364 | -0.2610 |
| 1PE | C8  | 568 | 13.209 | 15.684 | 9.257  | 0.0374  | -0.0288 | -0.3062 |
| 1PE | C9  | 569 | 13.584 | 15.534 | 9.082  | 0.0135  | 0.0104  | -0.3468 |
| 1PE | C10 | 570 | 13.991 | 15.511 | 8.944  | 0.0031  | 0.0367  | -0.3814 |
| 1PE | C11 | 571 | 14.313 | 15.314 | 8.702  | -0.0217 | 0.0388  | -0.4351 |
| 1PE | C12 | 572 | 14.271 | 15.109 | 8.285  | -0.0546 | 0.0888  | -0.4541 |
| 1PE | C13 | 573 | 13.943 | 15.131 | 7.943  | -0.0775 | 0.1198  | -0.4226 |
| 1PE | C14 | 574 | 14.014 | 15.413 | 7.571  | -0.1097 | 0.1538  | -0.4055 |
| 1PE | C15 | 575 | 14.410 | 15.623 | 7.640  | -0.1206 | 0.1629  | -0.4128 |
| 1PE | C16 | 576 | 14.569 | 15.572 | 8.063  | -0.0691 | 0.1262  | -0.4315 |
| 1PE | C17 | 577 | 14.374 | 15.729 | 8.442  | -0.0446 | 0.0820  | -0.3994 |
| 1PE | C18 | 578 | 14.366 | 15.840 | 8.882  | 0.0088  | 0.0295  | -0.3783 |
| 1PE | C19 | 579 | 14.273 | 15.708 | 9.315  | 0.0351  | -0.0164 | -0.3958 |

|     |     |     |        |        |        |         |         |         |
|-----|-----|-----|--------|--------|--------|---------|---------|---------|
| 1PE | C20 | 580 | 14.081 | 15.815 | 9.718  | 0.0747  | -0.0517 | -0.3712 |
| 1PE | C21 | 581 | 13.729 | 15.961 | 9.979  | 0.1233  | -0.0789 | -0.3192 |
| 1PE | C22 | 582 | 13.327 | 15.930 | 10.229 | 0.1376  | -0.1227 | -0.2758 |
| 1PE | C23 | 583 | 13.048 | 15.722 | 10.533 | 0.1743  | -0.1219 | -0.2770 |
| 1PE | C24 | 584 | 12.773 | 15.393 | 10.704 | 0.1875  | -0.1412 | -0.2735 |
| 1PE | C25 | 585 | 12.331 | 15.293 | 10.779 | 0.2001  | -0.1693 | -0.2402 |
| 1PE | C26 | 586 | 11.967 | 15.591 | 10.804 | 0.1889  | -0.1763 | -0.1869 |
| 1PE | C27 | 587 | 12.043 | 16.028 | 10.800 | 0.1708  | -0.1715 | -0.1427 |
| 1PE | C28 | 588 | 12.424 | 16.203 | 10.607 | 0.1892  | -0.1362 | -0.1637 |
| 1PE | C29 | 589 | 12.824 | 16.159 | 10.382 | 0.1440  | -0.1185 | -0.2134 |
| 1PE | C30 | 590 | 13.199 | 16.414 | 10.271 | 0.1363  | -0.1029 | -0.2218 |
| 1PE | C31 | 591 | 13.343 | 16.779 | 10.038 | 0.1184  | -0.0748 | -0.2122 |
| 1PE | C32 | 592 | 13.293 | 17.056 | 9.687  | 0.0777  | -0.0548 | -0.1724 |
| 1PE | C33 | 593 | 13.309 | 17.241 | 9.279  | 0.0319  | -0.0174 | -0.1506 |
| 1PE | C34 | 594 | 13.529 | 17.303 | 8.882  | -0.0119 | 0.0230  | -0.1707 |
| 1PE | C35 | 595 | 13.758 | 17.355 | 8.491  | -0.0414 | 0.0573  | -0.1858 |
| 1PE | C36 | 596 | 13.986 | 17.268 | 8.109  | -0.0816 | 0.0946  | -0.2163 |
| 1PE | C37 | 597 | 14.098 | 16.924 | 7.838  | -0.1105 | 0.1304  | -0.2564 |
| 1PE | C38 | 598 | 14.229 | 16.626 | 7.538  | -0.1331 | 0.1710  | -0.3170 |
| 1PE | C39 | 599 | 14.364 | 16.204 | 7.624  | -0.1144 | 0.1529  | -0.3489 |
| 1PE | C40 | 600 | 14.459 | 16.060 | 8.052  | -0.0902 | 0.1259  | -0.3810 |
| 1PE | C41 | 601 | 14.355 | 16.238 | 8.484  | -0.0482 | 0.0745  | -0.3676 |
| 1PE | C42 | 602 | 13.970 | 16.405 | 8.650  | -0.0266 | 0.0593  | -0.2989 |
| 1PE | C43 | 603 | 13.707 | 16.482 | 9.013  | 0.0171  | 0.0291  | -0.2764 |
| 1PE | C44 | 604 | 13.370 | 16.747 | 9.135  | 0.0179  | 0.0118  | -0.2134 |
| 1PE | C45 | 605 | 13.129 | 16.997 | 8.862  | -0.0019 | 0.0331  | -0.1656 |
| 1PE | C46 | 606 | 13.247 | 17.144 | 8.449  | -0.0557 | 0.0726  | -0.1551 |
| 1PE | C47 | 607 | 13.598 | 16.962 | 8.207  | -0.0733 | 0.1062  | -0.2086 |
| 1PE | C48 | 608 | 13.672 | 16.507 | 8.216  | -0.0658 | 0.1007  | -0.2753 |
| 1PE | C49 | 609 | 13.528 | 16.192 | 8.522  | -0.0295 | 0.0712  | -0.2738 |
| 1PE | C50 | 610 | 13.429 | 16.062 | 8.958  | -0.0033 | 0.0104  | -0.2855 |
| 1PE | C51 | 611 | 13.283 | 16.206 | 9.365  | 0.0300  | -0.0152 | -0.2549 |
| 1PE | C52 | 612 | 13.410 | 16.334 | 9.791  | 0.0897  | -0.0557 | -0.2481 |
| 1PE | C53 | 613 | 13.783 | 16.465 | 9.978  | 0.1038  | -0.0765 | -0.2899 |
| 1PE | C54 | 614 | 14.190 | 16.327 | 9.846  | 0.0939  | -0.0652 | -0.3474 |
| 1PE | C55 | 615 | 14.328 | 16.187 | 9.433  | 0.0575  | -0.0030 | -0.3565 |
| 1PE | C56 | 616 | 14.299 | 16.368 | 9.018  | -0.0064 | 0.0216  | -0.3390 |
| 1PE | C57 | 617 | 14.143 | 16.799 | 8.925  | -0.0057 | 0.0275  | -0.2887 |
| 1PE | C58 | 618 | 13.813 | 16.983 | 9.194  | 0.0194  | -0.0065 | -0.2214 |
| 1PE | C59 | 619 | 13.675 | 16.698 | 9.527  | 0.0433  | -0.0317 | -0.2480 |
| 1PE | C60 | 620 | 13.816 | 16.269 | 9.478  | 0.0656  | -0.0161 | -0.2957 |
| 1PE | C61 | 621 | 13.923 | 16.016 | 9.092  | 0.0106  | 0.0180  | -0.3349 |
| 1PE | C62 | 622 | 13.916 | 15.900 | 8.637  | -0.0207 | 0.0431  | -0.3360 |
| 1PE | C63 | 623 | 13.972 | 16.085 | 8.215  | -0.0537 | 0.1117  | -0.3420 |
| 1PE | C64 | 624 | 14.154 | 16.495 | 8.107  | -0.0723 | 0.1018  | -0.3097 |
| 1PE | C65 | 625 | 14.079 | 16.855 | 8.396  | -0.0541 | 0.0856  | -0.2663 |
| 1PE | C66 | 626 | 13.709 | 16.865 | 8.682  | -0.0375 | 0.0472  | -0.2226 |
| 1PE | C67 | 627 | 13.353 | 16.658 | 8.566  | -0.0330 | 0.0588  | -0.2097 |
| 1PE | C68 | 628 | 13.175 | 16.699 | 8.150  | -0.0872 | 0.1001  | -0.1787 |
| 1PE | C69 | 629 | 13.218 | 17.097 | 7.910  | -0.1186 | 0.1275  | -0.1475 |
| 1PE | C70 | 630 | 13.386 | 17.479 | 8.091  | -0.0998 | 0.0942  | -0.1499 |
| 1PE | C71 | 631 | 13.337 | 17.642 | 8.531  | -0.0457 | 0.0486  | -0.1168 |
| 1PE | C72 | 632 | 13.114 | 17.612 | 8.938  | -0.0130 | 0.0321  | -0.0878 |
| 1PE | C73 | 633 | 13.108 | 17.714 | 9.381  | 0.0324  | -0.0278 | -0.0958 |
| 1PE | C74 | 634 | 13.219 | 17.595 | 9.805  | 0.0713  | -0.0695 | -0.1022 |
| 1PE | C75 | 635 | 13.274 | 17.311 | 10.149 | 0.1153  | -0.0916 | -0.1356 |
| 1PE | C76 | 636 | 13.208 | 17.208 | 10.585 | 0.1521  | -0.1338 | -0.1414 |
| 1PE | C77 | 637 | 12.947 | 16.989 | 10.882 | 0.1974  | -0.1727 | -0.1316 |
| 1PE | C78 | 638 | 12.804 | 16.589 | 11.068 | 0.2213  | -0.1951 | -0.1660 |
| 1PE | C79 | 639 | 12.755 | 16.139 | 10.976 | 0.2032  | -0.1813 | -0.2085 |
| 1PE | C80 | 640 | 12.486 | 15.781 | 10.872 | 0.2089  | -0.1688 | -0.2094 |
| 1PE | C1  | 641 | 13.642 | 15.814 | 9.473  | 0.0744  | -0.0236 | -0.3281 |
| 1PE | C2  | 642 | 13.303 | 15.840 | 9.738  | 0.0873  | -0.0496 | -0.2760 |
| 1PE | C3  | 643 | 12.969 | 16.116 | 9.857  | 0.1087  | -0.0843 | -0.2149 |
| 1PE | C4  | 644 | 12.603 | 16.302 | 9.665  | 0.0695  | -0.0580 | -0.1718 |
| 1PE | C5  | 645 | 12.173 | 16.261 | 9.639  | 0.0701  | -0.0496 | -0.1289 |
| 1PE | C6  | 646 | 11.722 | 16.188 | 9.564  | 0.0625  | -0.0536 | -0.0953 |
| 1PE | C7  | 647 | 11.471 | 16.065 | 9.200  | 0.0182  | -0.0098 | -0.0973 |
| 1PE | C8  | 648 | 11.423 | 16.305 | 8.839  | -0.0064 | 0.0135  | -0.0601 |
| 1PE | C9  | 649 | 11.549 | 16.727 | 8.779  | -0.0036 | 0.0197  | -0.0292 |
| 1PE | C10 | 650 | 11.745 | 17.121 | 8.715  | -0.0223 | 0.0164  | -0.0138 |
| 1PE | C11 | 651 | 12.005 | 17.291 | 8.391  | -0.0680 | 0.0543  | -0.0172 |
| 1PE | C12 | 652 | 12.346 | 17.490 | 8.139  | -0.0923 | 0.1053  | -0.0385 |

|     |     |     |        |        |       |         |         |         |
|-----|-----|-----|--------|--------|-------|---------|---------|---------|
| 1PE | C13 | 653 | 12.571 | 17.853 | 8.243 | -0.0934 | 0.0888  | -0.0231 |
| 1PE | C14 | 654 | 12.470 | 18.238 | 8.465 | -0.0640 | 0.0511  | 0.0313  |
| 1PE | C15 | 655 | 12.273 | 18.665 | 8.478 | -0.0687 | 0.0622  | 0.0789  |
| 1PE | C16 | 656 | 12.090 | 18.909 | 8.815 | -0.0373 | 0.0212  | 0.1093  |
| 1PE | C17 | 657 | 12.159 | 18.754 | 9.234 | 0.0157  | -0.0178 | 0.1164  |
| 1PE | C18 | 658 | 12.521 | 18.486 | 9.276 | 0.0097  | -0.0199 | 0.0271  |
| 1PE | C19 | 659 | 12.741 | 18.300 | 8.909 | -0.0258 | 0.0188  | 0.0039  |
| 1PE | C20 | 660 | 12.950 | 18.046 | 8.574 | -0.0627 | 0.0671  | -0.0418 |
| 1PE | C21 | 661 | 13.081 | 17.896 | 8.178 | -0.0876 | 0.0935  | -0.0720 |
| 1PE | C22 | 662 | 13.105 | 17.840 | 7.743 | -0.1369 | 0.1300  | -0.0644 |
| 1PE | C23 | 663 | 12.976 | 18.025 | 7.357 | -0.1784 | 0.1496  | -0.0379 |
| 1PE | C24 | 664 | 12.620 | 18.212 | 7.169 | -0.1847 | 0.1835  | 0.0028  |
| 1PE | C25 | 665 | 12.304 | 18.515 | 7.318 | -0.1760 | 0.1705  | 0.0561  |
| 1PE | C26 | 666 | 12.354 | 18.816 | 7.669 | -0.1451 | 0.1255  | 0.0890  |
| 1PE | C27 | 667 | 12.555 | 18.667 | 8.048 | -0.1184 | 0.0928  | 0.0539  |
| 1PE | C28 | 668 | 12.750 | 18.265 | 8.022 | -0.0945 | 0.1094  | 0.0045  |
| 1PE | C29 | 669 | 12.606 | 17.966 | 7.716 | -0.1252 | 0.1226  | -0.0189 |
| 1PE | C30 | 670 | 12.257 | 17.987 | 7.444 | -0.1705 | 0.1467  | 0.0204  |
| 1PE | C31 | 671 | 12.118 | 18.141 | 7.035 | -0.2051 | 0.1849  | 0.0409  |
| 1PE | C32 | 672 | 12.390 | 18.284 | 6.715 | -0.2267 | 0.2022  | 0.0274  |
| 1PE | C33 | 673 | 12.826 | 18.140 | 6.653 | -0.2559 | 0.2425  | -0.0201 |
| 1PE | C34 | 674 | 13.045 | 17.812 | 6.885 | -0.2289 | 0.1998  | -0.0821 |
| 1PE | C35 | 675 | 12.910 | 17.554 | 7.207 | -0.1898 | 0.1791  | -0.0877 |
| 1PE | C36 | 676 | 12.746 | 17.490 | 7.611 | -0.1537 | 0.1426  | -0.0767 |
| 1PE | C37 | 677 | 12.853 | 17.463 | 8.043 | -0.1097 | 0.0862  | -0.0811 |
| 1PE | C38 | 678 | 12.845 | 17.517 | 8.501 | -0.0627 | 0.0503  | -0.0857 |
| 1PE | C39 | 679 | 12.723 | 17.265 | 8.867 | -0.0153 | 0.0266  | -0.1100 |
| 1PE | C40 | 680 | 12.675 | 16.791 | 8.875 | -0.0104 | 0.0071  | -0.1232 |
| 1PE | C41 | 681 | 12.589 | 16.318 | 8.823 | -0.0058 | 0.0360  | -0.1667 |
| 1PE | C42 | 682 | 12.293 | 16.069 | 8.696 | -0.0136 | 0.0433  | -0.1565 |
| 1PE | C43 | 683 | 12.166 | 16.016 | 8.280 | -0.0658 | 0.0580  | -0.1535 |
| 1PE | C44 | 684 | 12.395 | 16.149 | 7.887 | -0.0990 | 0.1046  | -0.1717 |
| 1PE | C45 | 685 | 12.855 | 16.176 | 7.845 | -0.1075 | 0.1195  | -0.2134 |
| 1PE | C46 | 686 | 13.131 | 16.131 | 8.205 | -0.0691 | 0.0894  | -0.2446 |
| 1PE | C47 | 687 | 13.065 | 16.030 | 8.616 | -0.0273 | 0.0404  | -0.2538 |
| 1PE | C48 | 688 | 12.895 | 15.989 | 9.025 | 0.0114  | 0.0161  | -0.2288 |
| 1PE | C49 | 689 | 12.493 | 16.027 | 9.250 | 0.0470  | -0.0103 | -0.1985 |
| 1PE | C50 | 690 | 12.056 | 16.103 | 9.168 | 0.0335  | -0.0038 | -0.1373 |
| 1PE | C51 | 691 | 11.835 | 16.453 | 9.103 | 0.0103  | -0.0125 | -0.0778 |
| 1PE | C52 | 692 | 11.981 | 16.869 | 9.096 | 0.0100  | 0.0021  | -0.0443 |
| 1PE | C53 | 693 | 12.237 | 17.130 | 8.828 | -0.0214 | 0.0173  | -0.0396 |
| 1PE | C54 | 694 | 12.503 | 17.138 | 8.452 | -0.0550 | 0.0406  | -0.0851 |
| 1PE | C55 | 695 | 12.750 | 16.982 | 8.115 | -0.0845 | 0.0990  | -0.1149 |
| 1PE | C56 | 696 | 12.633 | 16.606 | 8.005 | -0.1107 | 0.1110  | -0.1371 |
| 1PE | C57 | 697 | 12.314 | 16.480 | 8.301 | -0.0564 | 0.0804  | -0.1333 |
| 1PE | C58 | 698 | 12.224 | 16.630 | 8.749 | -0.0072 | 0.0382  | -0.1150 |
| 1PE | C59 | 699 | 12.368 | 16.539 | 9.202 | 0.0194  | -0.0048 | -0.1308 |
| 1PE | C60 | 700 | 12.820 | 16.425 | 9.254 | 0.0364  | -0.0126 | -0.1806 |
| 1PE | C61 | 701 | 13.068 | 16.452 | 8.897 | 0.0018  | 0.0320  | -0.2027 |
| 1PE | C62 | 702 | 12.875 | 16.484 | 8.473 | -0.0377 | 0.0600  | -0.1750 |
| 1PE | C63 | 703 | 12.650 | 16.116 | 8.324 | -0.0602 | 0.0589  | -0.1946 |
| 1PE | C64 | 704 | 12.662 | 15.723 | 8.564 | -0.0201 | 0.0347  | -0.2390 |
| 1PE | C65 | 705 | 13.041 | 15.567 | 8.775 | -0.0123 | 0.0322  | -0.2889 |
| 1PE | C66 | 706 | 13.440 | 15.651 | 8.634 | -0.0133 | 0.0389  | -0.3120 |
| 1PE | C67 | 707 | 13.580 | 15.769 | 8.270 | -0.0478 | 0.0635  | -0.3110 |
| 1PE | C68 | 708 | 13.549 | 16.033 | 7.961 | -0.0957 | 0.1252  | -0.2919 |
| 1PE | C69 | 709 | 13.351 | 16.357 | 7.824 | -0.1057 | 0.1414  | -0.2363 |
| 1PE | C70 | 710 | 13.124 | 16.671 | 7.660 | -0.1382 | 0.1395  | -0.2004 |
| 1PE | C71 | 711 | 12.858 | 17.002 | 7.566 | -0.1512 | 0.1419  | -0.1374 |
| 1PE | C72 | 712 | 12.440 | 17.072 | 7.687 | -0.1331 | 0.1291  | -0.0869 |
| 1PE | C73 | 713 | 12.204 | 16.979 | 8.061 | -0.0950 | 0.0909  | -0.0757 |
| 1PE | C74 | 714 | 11.931 | 16.779 | 8.389 | -0.0775 | 0.0659  | -0.0571 |
| 1PE | C75 | 715 | 11.862 | 16.353 | 8.584 | -0.0399 | 0.0344  | -0.0943 |
| 1PE | C76 | 716 | 11.803 | 15.927 | 8.744 | -0.0194 | 0.0404  | -0.1180 |
| 1PE | C77 | 717 | 11.723 | 15.479 | 8.719 | -0.0207 | 0.0268  | -0.1659 |
| 1PE | C78 | 718 | 11.431 | 15.134 | 8.756 | 0.0096  | 0.0082  | -0.1707 |
| 1PE | C79 | 719 | 11.055 | 15.035 | 8.537 | -0.0218 | 0.0369  | -0.1273 |
| 1PE | C80 | 720 | 10.726 | 15.261 | 8.334 | -0.0528 | 0.0514  | -0.0731 |
| 1PE | C1  | 721 | 10.273 | 18.541 | 9.987 | 0.0825  | -0.1136 | 0.2569  |
| 1PE | C2  | 722 | 10.333 | 18.322 | 9.617 | 0.0625  | -0.0683 | 0.2403  |
| 1PE | C3  | 723 | 10.131 | 18.262 | 9.255 | 0.0128  | -0.0289 | 0.2746  |
| 1PE | C4  | 724 | 10.233 | 18.350 | 8.830 | -0.0189 | 0.0124  | 0.2601  |
| 1PE | C5  | 725 | 10.486 | 18.135 | 8.556 | -0.0504 | 0.0311  | 0.2127  |

|     |     |     |        |        |       |         |         |        |
|-----|-----|-----|--------|--------|-------|---------|---------|--------|
| 1PE | C6  | 726 | 10.499 | 17.713 | 8.597 | -0.0450 | 0.0280  | 0.1788 |
| 1PE | C7  | 727 | 10.172 | 17.477 | 8.779 | -0.0395 | 0.0130  | 0.1934 |
| 1PE | C8  | 728 | 9.748  | 17.532 | 8.657 | -0.0300 | 0.0149  | 0.2255 |
| 1PE | C9  | 729 | 9.622  | 17.787 | 8.282 | -0.0681 | 0.0536  | 0.2459 |
| 1PE | C10 | 730 | 9.883  | 18.061 | 8.032 | -0.0915 | 0.0685  | 0.2838 |
| 1PE | C11 | 731 | 10.121 | 18.414 | 7.861 | -0.1285 | 0.1087  | 0.2719 |
| 1PE | C12 | 732 | 10.148 | 18.788 | 7.642 | -0.1507 | 0.1159  | 0.3006 |
| 1PE | C13 | 733 | 10.415 | 18.904 | 7.303 | -0.1882 | 0.1471  | 0.2867 |
| 1PE | C14 | 734 | 10.683 | 18.614 | 7.079 | -0.2010 | 0.1734  | 0.2545 |
| 1PE | C15 | 735 | 10.621 | 18.171 | 6.963 | -0.2138 | 0.1851  | 0.2007 |
| 1PE | C16 | 736 | 10.461 | 17.805 | 7.202 | -0.1939 | 0.1596  | 0.1854 |
| 1PE | C17 | 737 | 10.583 | 17.703 | 7.609 | -0.1358 | 0.1081  | 0.1664 |
| 1PE | C18 | 738 | 10.973 | 17.691 | 7.806 | -0.1260 | 0.1083  | 0.1095 |
| 1PE | C19 | 739 | 11.153 | 17.468 | 8.152 | -0.0879 | 0.0769  | 0.0822 |
| 1PE | C20 | 740 | 11.051 | 17.457 | 8.588 | -0.0452 | 0.0356  | 0.0999 |
| 1PE | C21 | 741 | 10.683 | 17.272 | 8.717 | -0.0410 | 0.0098  | 0.1092 |
| 1PE | C22 | 742 | 10.427 | 17.273 | 8.376 | -0.0616 | 0.0417  | 0.1365 |
| 1PE | C23 | 743 | 10.586 | 17.511 | 8.090 | -0.0939 | 0.0880  | 0.1556 |
| 1PE | C24 | 744 | 10.830 | 17.848 | 8.251 | -0.0920 | 0.0684  | 0.1452 |
| 1PE | C25 | 745 | 10.936 | 17.930 | 8.696 | -0.0361 | 0.0192  | 0.1396 |
| 1PE | C26 | 746 | 10.837 | 17.704 | 9.035 | -0.0037 | -0.0256 | 0.1471 |
| 1PE | C27 | 747 | 10.519 | 17.429 | 9.177 | 0.0158  | -0.0209 | 0.1556 |
| 1PE | C28 | 748 | 10.072 | 17.432 | 9.285 | 0.0193  | -0.0471 | 0.1881 |
| 1PE | C29 | 749 | 9.635  | 17.415 | 9.163 | 0.0118  | -0.0363 | 0.2466 |
| 1PE | C30 | 750 | 9.288  | 17.505 | 8.865 | -0.0324 | -0.0073 | 0.2736 |
| 1PE | C31 | 751 | 9.312  | 17.414 | 8.413 | -0.0695 | 0.0327  | 0.2669 |
| 1PE | C32 | 752 | 9.699  | 17.280 | 8.195 | -0.0769 | 0.0579  | 0.2061 |
| 1PE | C33 | 753 | 10.091 | 17.185 | 8.020 | -0.1073 | 0.0731  | 0.1494 |
| 1PE | C34 | 754 | 10.388 | 17.230 | 7.679 | -0.1276 | 0.1148  | 0.1403 |
| 1PE | C35 | 755 | 10.657 | 17.277 | 7.340 | -0.1683 | 0.1414  | 0.1280 |
| 1PE | C36 | 756 | 10.691 | 17.421 | 6.928 | -0.1938 | 0.1860  | 0.1132 |
| 1PE | C37 | 757 | 10.885 | 17.767 | 6.782 | -0.2295 | 0.1895  | 0.1448 |
| 1PE | C38 | 758 | 11.167 | 18.025 | 6.977 | -0.2093 | 0.1747  | 0.1512 |
| 1PE | C39 | 759 | 11.504 | 18.317 | 6.935 | -0.2218 | 0.1933  | 0.1351 |
| 1PE | C40 | 760 | 11.831 | 18.586 | 7.082 | -0.2013 | 0.1721  | 0.1208 |
| 1PE | C41 | 761 | 11.885 | 18.746 | 7.503 | -0.1619 | 0.1414  | 0.1303 |
| 1PE | C42 | 762 | 11.563 | 18.751 | 7.816 | -0.1313 | 0.1257  | 0.1610 |
| 1PE | C43 | 763 | 11.117 | 18.726 | 7.738 | -0.1527 | 0.1185  | 0.2062 |
| 1PE | C44 | 764 | 10.917 | 18.966 | 7.420 | -0.1723 | 0.1337  | 0.2453 |
| 1PE | C45 | 765 | 11.121 | 19.338 | 7.237 | -0.1967 | 0.1564  | 0.2652 |
| 1PE | C46 | 766 | 11.575 | 19.441 | 7.314 | -0.1881 | 0.1614  | 0.2343 |
| 1PE | C47 | 767 | 11.841 | 19.240 | 7.646 | -0.1496 | 0.1299  | 0.1778 |
| 1PE | C48 | 768 | 11.700 | 19.150 | 8.070 | -0.1169 | 0.0791  | 0.1728 |
| 1PE | C49 | 769 | 11.283 | 19.015 | 8.202 | -0.0988 | 0.0644  | 0.2150 |
| 1PE | C50 | 770 | 10.882 | 18.785 | 8.201 | -0.0895 | 0.0697  | 0.2325 |
| 1PE | C51 | 771 | 10.512 | 18.529 | 8.166 | -0.0799 | 0.0823  | 0.2652 |
| 1PE | C52 | 772 | 10.101 | 18.401 | 8.357 | -0.0779 | 0.0525  | 0.2580 |
| 1PE | C53 | 773 | 10.001 | 17.993 | 8.543 | -0.0544 | 0.0374  | 0.2435 |
| 1PE | C54 | 774 | 10.097 | 17.629 | 8.293 | -0.0674 | 0.0686  | 0.1930 |
| 1PE | C55 | 775 | 10.158 | 17.647 | 7.855 | -0.1166 | 0.1137  | 0.1983 |
| 1PE | C56 | 776 | 10.142 | 17.978 | 7.583 | -0.1539 | 0.1306  | 0.2467 |
| 1PE | C57 | 777 | 10.417 | 18.277 | 7.444 | -0.1577 | 0.1309  | 0.2402 |
| 1PE | C58 | 778 | 10.632 | 18.574 | 7.621 | -0.1453 | 0.1156  | 0.2281 |
| 1PE | C59 | 779 | 10.598 | 18.942 | 7.825 | -0.1375 | 0.1009  | 0.2795 |
| 1PE | C60 | 780 | 10.910 | 19.232 | 7.913 | -0.1312 | 0.0927  | 0.2742 |
| 1PE | C61 | 781 | 11.323 | 19.209 | 7.720 | -0.1465 | 0.1224  | 0.2361 |
| 1PE | C62 | 782 | 11.436 | 18.961 | 7.364 | -0.1863 | 0.1722  | 0.1925 |
| 1PE | C63 | 783 | 11.201 | 18.761 | 7.039 | -0.1976 | 0.1905  | 0.2023 |
| 1PE | C64 | 784 | 11.050 | 18.457 | 6.739 | -0.2446 | 0.2182  | 0.1936 |
| 1PE | C65 | 785 | 11.234 | 18.115 | 6.494 | -0.2503 | 0.2454  | 0.1392 |
| 1PE | C66 | 786 | 11.398 | 17.705 | 6.625 | -0.2485 | 0.2188  | 0.1028 |
| 1PE | C67 | 787 | 11.237 | 17.449 | 6.975 | -0.2040 | 0.1832  | 0.0713 |
| 1PE | C68 | 788 | 11.014 | 17.612 | 7.311 | -0.1825 | 0.1506  | 0.1131 |
| 1PE | C69 | 789 | 10.866 | 18.034 | 7.395 | -0.1792 | 0.1535  | 0.1659 |
| 1PE | C70 | 790 | 11.045 | 18.391 | 7.344 | -0.1774 | 0.1553  | 0.1743 |
| 1PE | C71 | 791 | 11.455 | 18.476 | 7.414 | -0.1666 | 0.1480  | 0.1576 |
| 1PE | C72 | 792 | 11.813 | 18.230 | 7.452 | -0.1761 | 0.1452  | 0.1007 |
| 1PE | C73 | 793 | 11.804 | 17.842 | 7.629 | -0.1482 | 0.1250  | 0.0648 |
| 1PE | C74 | 794 | 11.508 | 17.749 | 7.942 | -0.1078 | 0.0945  | 0.0791 |
| 1PE | C75 | 795 | 11.293 | 18.002 | 8.260 | -0.0786 | 0.0608  | 0.1240 |
| 1PE | C76 | 796 | 10.937 | 18.315 | 8.389 | -0.0605 | 0.0601  | 0.1880 |
| 1PE | C77 | 797 | 10.797 | 18.456 | 8.790 | -0.0322 | 0.0106  | 0.2240 |
| 1PE | C78 | 798 | 10.633 | 18.192 | 9.091 | -0.0050 | -0.0207 | 0.2044 |



|     |     |     |        |        |       |         |         |         |
|-----|-----|-----|--------|--------|-------|---------|---------|---------|
| 1PE | C79 | 799 | 10.347 | 17.878 | 9.049 | -0.0026 | -0.0274 | 0.2068  |
| 1PE | C80 | 800 | 9.917  | 17.846 | 9.046 | 0.0010  | -0.0281 | 0.2472  |
| 1PE | C1  | 801 | 11.505 | 14.637 | 8.615 | -0.0108 | 0.0379  | -0.2310 |
| 1PE | C2  | 802 | 11.887 | 14.578 | 8.365 | -0.0266 | 0.0568  | -0.2780 |
| 1PE | C3  | 803 | 12.121 | 14.503 | 7.983 | -0.0733 | 0.0989  | -0.2901 |
| 1PE | C4  | 804 | 12.241 | 14.634 | 7.564 | -0.1170 | 0.1411  | -0.2924 |
| 1PE | C5  | 805 | 12.220 | 14.704 | 7.096 | -0.1688 | 0.1805  | -0.2858 |
| 1PE | C6  | 806 | 12.113 | 14.887 | 6.690 | -0.1845 | 0.2069  | -0.2716 |
| 1PE | C7  | 807 | 12.259 | 14.943 | 6.272 | -0.2456 | 0.2703  | -0.2602 |
| 1PE | C8  | 808 | 12.412 | 15.288 | 6.031 | -0.2739 | 0.2818  | -0.2471 |
| 1PE | C9  | 809 | 12.153 | 15.614 | 5.894 | -0.2985 | 0.3079  | -0.1875 |
| 1PE | C10 | 810 | 11.721 | 15.656 | 5.898 | -0.2992 | 0.2880  | -0.1583 |
| 1PE | C11 | 811 | 11.275 | 15.723 | 5.957 | -0.2840 | 0.2723  | -0.0984 |
| 1PE | C12 | 812 | 10.907 | 15.923 | 6.133 | -0.2837 | 0.2636  | -0.0366 |
| 1PE | C13 | 813 | 10.794 | 16.169 | 6.499 | -0.2427 | 0.2391  | 0.0043  |
| 1PE | C14 | 814 | 10.926 | 16.524 | 6.736 | -0.2161 | 0.2035  | 0.0010  |
| 1PE | C15 | 815 | 11.312 | 16.710 | 6.778 | -0.2208 | 0.2064  | -0.0121 |
| 1PE | C16 | 816 | 11.657 | 16.670 | 6.470 | -0.2372 | 0.2399  | -0.0400 |
| 1PE | C17 | 817 | 11.651 | 16.502 | 6.046 | -0.2821 | 0.2918  | -0.0477 |
| 1PE | C18 | 818 | 11.954 | 16.468 | 5.705 | -0.3369 | 0.3170  | -0.0949 |
| 1PE | C19 | 819 | 12.325 | 16.671 | 5.781 | -0.3206 | 0.3244  | -0.1160 |
| 1PE | C20 | 820 | 12.321 | 16.892 | 6.144 | -0.2828 | 0.2841  | -0.0811 |
| 1PE | C21 | 821 | 11.951 | 17.078 | 6.384 | -0.2733 | 0.2398  | -0.0367 |
| 1PE | C22 | 822 | 11.728 | 17.451 | 6.291 | -0.2619 | 0.2570  | 0.0160  |
| 1PE | C23 | 823 | 11.727 | 17.604 | 5.869 | -0.3112 | 0.3023  | 0.0275  |
| 1PE | C24 | 824 | 11.732 | 17.304 | 5.526 | -0.3517 | 0.3337  | 0.0146  |
| 1PE | C25 | 825 | 11.531 | 16.861 | 5.537 | -0.3498 | 0.3298  | -0.0166 |
| 1PE | C26 | 826 | 11.163 | 16.749 | 5.786 | -0.2962 | 0.3144  | 0.0142  |
| 1PE | C27 | 827 | 10.934 | 17.049 | 6.064 | -0.2865 | 0.2818  | 0.0562  |
| 1PE | C28 | 828 | 11.110 | 17.420 | 6.254 | -0.2866 | 0.2619  | 0.0931  |
| 1PE | C29 | 829 | 11.335 | 17.778 | 6.122 | -0.2844 | 0.2571  | 0.0960  |
| 1PE | C30 | 830 | 11.708 | 17.973 | 6.285 | -0.2802 | 0.2665  | 0.0665  |
| 1PE | C31 | 831 | 11.949 | 17.837 | 6.647 | -0.2428 | 0.2284  | 0.0471  |
| 1PE | C32 | 832 | 12.172 | 17.457 | 6.691 | -0.2185 | 0.2253  | -0.0171 |
| 1PE | C33 | 833 | 12.414 | 17.293 | 6.392 | -0.2496 | 0.2588  | -0.0706 |
| 1PE | C34 | 834 | 12.599 | 17.506 | 6.086 | -0.2895 | 0.2892  | -0.0575 |
| 1PE | C35 | 835 | 12.436 | 17.676 | 5.703 | -0.3247 | 0.3218  | -0.0384 |
| 1PE | C36 | 836 | 12.254 | 17.416 | 5.366 | -0.3688 | 0.3398  | -0.0319 |
| 1PE | C37 | 837 | 12.459 | 17.026 | 5.221 | -0.3789 | 0.3721  | -0.0825 |
| 1PE | C38 | 838 | 12.718 | 16.736 | 5.451 | -0.3626 | 0.3566  | -0.1387 |
| 1PE | C39 | 839 | 13.130 | 16.641 | 5.622 | -0.3338 | 0.3297  | -0.2035 |
| 1PE | C40 | 840 | 13.559 | 16.709 | 5.728 | -0.3194 | 0.3254  | -0.2343 |
| 1PE | C41 | 841 | 13.886 | 16.830 | 6.015 | -0.2966 | 0.3042  | -0.2532 |
| 1PE | C42 | 842 | 13.926 | 17.163 | 6.314 | -0.2704 | 0.2893  | -0.2151 |
| 1PE | C43 | 843 | 13.592 | 17.302 | 6.571 | -0.2462 | 0.2428  | -0.1764 |
| 1PE | C44 | 844 | 13.179 | 17.218 | 6.542 | -0.2306 | 0.2486  | -0.1406 |
| 1PE | C45 | 845 | 12.900 | 17.131 | 6.239 | -0.2580 | 0.2777  | -0.1220 |
| 1PE | C46 | 846 | 12.814 | 16.837 | 5.959 | -0.3117 | 0.2976  | -0.1519 |
| 1PE | C47 | 847 | 12.747 | 16.417 | 5.874 | -0.3067 | 0.3135  | -0.1832 |
| 1PE | C48 | 848 | 12.492 | 16.251 | 5.532 | -0.3468 | 0.3352  | -0.1634 |
| 1PE | C49 | 849 | 12.245 | 16.543 | 5.277 | -0.3499 | 0.3493  | -0.1064 |
| 1PE | C50 | 850 | 12.044 | 16.913 | 5.467 | -0.3604 | 0.3553  | -0.0537 |
| 1PE | C51 | 851 | 11.869 | 16.939 | 5.888 | -0.3056 | 0.2953  | -0.0278 |
| 1PE | C52 | 852 | 11.485 | 17.005 | 6.099 | -0.3028 | 0.2644  | 0.0025  |
| 1PE | C53 | 853 | 11.198 | 16.715 | 6.298 | -0.2698 | 0.2544  | 0.0166  |
| 1PE | C54 | 854 | 11.289 | 16.304 | 6.409 | -0.2335 | 0.2329  | -0.0442 |
| 1PE | C55 | 855 | 11.588 | 16.028 | 6.218 | -0.2785 | 0.2664  | -0.0955 |
| 1PE | C56 | 856 | 11.995 | 16.088 | 6.041 | -0.2849 | 0.2787  | -0.1218 |
| 1PE | C57 | 857 | 12.340 | 16.344 | 6.153 | -0.2774 | 0.2651  | -0.1535 |
| 1PE | C58 | 858 | 12.655 | 16.609 | 6.372 | -0.2552 | 0.2552  | -0.1567 |
| 1PE | C59 | 859 | 12.684 | 16.948 | 6.665 | -0.2202 | 0.2262  | -0.1264 |
| 1PE | C60 | 860 | 12.752 | 17.404 | 6.721 | -0.2283 | 0.2176  | -0.0877 |
| 1PE | C61 | 861 | 12.951 | 17.671 | 6.407 | -0.2653 | 0.2564  | -0.0747 |
| 1PE | C62 | 862 | 13.271 | 17.502 | 6.121 | -0.2895 | 0.2928  | -0.1320 |
| 1PE | C63 | 863 | 13.414 | 17.073 | 6.094 | -0.2913 | 0.2870  | -0.1880 |
| 1PE | C64 | 864 | 13.258 | 16.664 | 6.145 | -0.2818 | 0.2869  | -0.2166 |
| 1PE | C65 | 865 | 13.107 | 16.273 | 6.191 | -0.2664 | 0.2866  | -0.2240 |
| 1PE | C66 | 866 | 12.756 | 16.094 | 6.322 | -0.2570 | 0.2529  | -0.2156 |
| 1PE | C67 | 867 | 12.464 | 16.228 | 6.639 | -0.2145 | 0.2275  | -0.1644 |
| 1PE | C68 | 868 | 12.535 | 16.557 | 6.951 | -0.2058 | 0.1900  | -0.1430 |
| 1PE | C69 | 869 | 12.548 | 16.949 | 7.172 | -0.1808 | 0.1821  | -0.1131 |
| 1PE | C70 | 870 | 12.466 | 17.371 | 7.168 | -0.1803 | 0.1818  | -0.0223 |
| 1PE | C71 | 871 | 12.500 | 17.771 | 6.938 | -0.2147 | 0.2035  | -0.0319 |

|     |     |     |        |        |       |         |         |         |
|-----|-----|-----|--------|--------|-------|---------|---------|---------|
| 1PE | C72 | 872 | 12.455 | 17.828 | 6.501 | -0.2689 | 0.2293  | -0.0132 |
| 1PE | C73 | 873 | 12.156 | 17.697 | 6.187 | -0.2876 | 0.2742  | -0.0014 |
| 1PE | C74 | 874 | 12.145 | 17.333 | 5.931 | -0.3048 | 0.2948  | -0.0237 |
| 1PE | C75 | 875 | 12.499 | 17.145 | 5.725 | -0.3305 | 0.3292  | -0.0826 |
| 1PE | C76 | 876 | 12.919 | 17.343 | 5.740 | -0.3195 | 0.3225  | -0.1007 |
| 1PE | C77 | 877 | 12.933 | 17.799 | 5.871 | -0.3359 | 0.3145  | -0.0602 |
| 1PE | C78 | 878 | 12.573 | 18.033 | 6.055 | -0.3073 | 0.2865  | -0.0045 |
| 1PE | C79 | 879 | 12.181 | 18.197 | 6.262 | -0.2954 | 0.2787  | 0.0580  |
| 1PE | C80 | 880 | 11.889 | 18.344 | 6.597 | -0.2521 | 0.2288  | 0.0898  |
| 1PE | C1  | 881 | 11.873 | 14.736 | 8.966 | 0.0062  | -0.0000 | -0.2380 |
| 1PE | C2  | 882 | 11.908 | 15.020 | 8.608 | -0.0126 | 0.0256  | -0.2235 |
| 1PE | C3  | 883 | 11.933 | 15.261 | 8.242 | -0.0567 | 0.0674  | -0.2145 |
| 1PE | C4  | 884 | 11.718 | 15.387 | 7.870 | -0.1009 | 0.1116  | -0.1692 |
| 1PE | C5  | 885 | 11.830 | 15.494 | 7.449 | -0.1470 | 0.1512  | -0.1756 |
| 1PE | C6  | 886 | 12.232 | 15.581 | 7.303 | -0.1537 | 0.1678  | -0.2092 |
| 1PE | C7  | 887 | 12.554 | 15.810 | 7.547 | -0.1303 | 0.1431  | -0.2191 |
| 1PE | C8  | 888 | 12.643 | 15.721 | 7.990 | -0.0932 | 0.1086  | -0.2327 |
| 1PE | C9  | 889 | 12.449 | 15.368 | 8.142 | -0.0600 | 0.0847  | -0.2415 |
| 1PE | C10 | 890 | 12.255 | 15.113 | 7.826 | -0.0856 | 0.1046  | -0.2571 |
| 1PE | C11 | 891 | 12.348 | 15.100 | 7.377 | -0.1467 | 0.1596  | -0.2531 |
| 1PE | C12 | 892 | 12.365 | 15.244 | 6.960 | -0.1877 | 0.2074  | -0.2540 |
| 1PE | C13 | 893 | 12.356 | 15.602 | 6.707 | -0.2056 | 0.2192  | -0.2151 |
| 1PE | C14 | 894 | 12.340 | 15.837 | 6.314 | -0.2517 | 0.2652  | -0.1985 |
| 1PE | C15 | 895 | 12.543 | 15.929 | 5.919 | -0.3048 | 0.2883  | -0.2012 |
| 1PE | C16 | 896 | 12.949 | 16.007 | 5.696 | -0.3191 | 0.3250  | -0.2481 |
| 1PE | C17 | 897 | 13.365 | 16.211 | 5.764 | -0.3104 | 0.3233  | -0.2654 |
| 1PE | C18 | 898 | 13.691 | 16.355 | 6.073 | -0.3014 | 0.3080  | -0.2781 |
| 1PE | C19 | 899 | 13.939 | 16.403 | 6.463 | -0.2460 | 0.2646  | -0.3115 |
| 1PE | C20 | 900 | 13.834 | 16.458 | 6.899 | -0.2084 | 0.2288  | -0.2832 |
| 1PE | C21 | 901 | 13.978 | 16.264 | 7.268 | -0.1529 | 0.1883  | -0.3121 |
| 1PE | C22 | 902 | 14.176 | 15.847 | 7.253 | -0.1635 | 0.1913  | -0.3701 |
| 1PE | C23 | 903 | 14.044 | 15.502 | 6.947 | -0.2033 | 0.2240  | -0.3951 |
| 1PE | C24 | 904 | 13.812 | 15.477 | 6.530 | -0.2266 | 0.2501  | -0.3640 |
| 1PE | C25 | 905 | 13.340 | 15.466 | 6.449 | -0.2453 | 0.2698  | -0.3274 |
| 1PE | C26 | 906 | 12.997 | 15.406 | 6.768 | -0.2185 | 0.2204  | -0.3016 |
| 1PE | C27 | 907 | 12.742 | 15.515 | 7.148 | -0.1624 | 0.1807  | -0.2653 |
| 1PE | C28 | 908 | 12.742 | 15.347 | 7.595 | -0.1347 | 0.1602  | -0.2873 |
| 1PE | C29 | 909 | 12.699 | 14.904 | 7.656 | -0.1130 | 0.1326  | -0.3217 |
| 1PE | C30 | 910 | 12.684 | 14.669 | 7.275 | -0.1410 | 0.1604  | -0.3359 |
| 1PE | C31 | 911 | 12.707 | 14.867 | 6.851 | -0.1954 | 0.2096  | -0.3161 |
| 1PE | C32 | 912 | 12.607 | 15.191 | 6.529 | -0.2454 | 0.2375  | -0.2836 |
| 1PE | C33 | 913 | 12.743 | 15.560 | 6.333 | -0.2491 | 0.2523  | -0.2510 |
| 1PE | C34 | 914 | 13.062 | 15.744 | 6.111 | -0.2742 | 0.2861  | -0.2754 |
| 1PE | C35 | 915 | 13.473 | 15.894 | 6.146 | -0.2728 | 0.2943  | -0.3051 |
| 1PE | C36 | 916 | 13.884 | 15.926 | 6.308 | -0.2574 | 0.2721  | -0.3466 |
| 1PE | C37 | 917 | 14.095 | 15.970 | 6.715 | -0.2224 | 0.2383  | -0.3570 |
| 1PE | C38 | 918 | 14.343 | 16.275 | 6.941 | -0.2123 | 0.2297  | -0.3564 |
| 1PE | C39 | 919 | 14.247 | 16.720 | 7.023 | -0.1882 | 0.2234  | -0.2833 |
| 1PE | C40 | 920 | 13.924 | 16.962 | 6.793 | -0.2205 | 0.2426  | -0.2343 |
| 1PE | C41 | 921 | 13.628 | 16.787 | 6.476 | -0.2542 | 0.2688  | -0.2337 |
| 1PE | C42 | 922 | 13.452 | 16.369 | 6.544 | -0.2226 | 0.2469  | -0.2621 |
| 1PE | C43 | 923 | 13.364 | 16.272 | 6.978 | -0.2010 | 0.2079  | -0.2480 |
| 1PE | C44 | 924 | 13.535 | 16.526 | 7.324 | -0.1607 | 0.1821  | -0.2479 |
| 1PE | C45 | 925 | 13.839 | 16.873 | 7.306 | -0.1552 | 0.1883  | -0.2384 |
| 1PE | C46 | 926 | 13.724 | 17.293 | 7.153 | -0.1927 | 0.1887  | -0.1863 |
| 1PE | C47 | 927 | 13.323 | 17.375 | 6.996 | -0.2115 | 0.2142  | -0.1562 |
| 1PE | C48 | 928 | 13.011 | 17.089 | 7.011 | -0.2013 | 0.2039  | -0.1371 |
| 1PE | C49 | 929 | 12.988 | 16.693 | 7.172 | -0.1646 | 0.1780  | -0.1653 |
| 1PE | C50 | 930 | 12.691 | 16.522 | 7.465 | -0.1466 | 0.1434  | -0.1463 |
| 1PE | C51 | 931 | 12.414 | 16.250 | 7.375 | -0.1457 | 0.1472  | -0.1567 |
| 1PE | C52 | 932 | 12.446 | 15.949 | 7.054 | -0.1785 | 0.1827  | -0.2056 |
| 1PE | C53 | 933 | 12.777 | 15.849 | 6.757 | -0.2105 | 0.2264  | -0.2460 |
| 1PE | C54 | 934 | 13.161 | 15.930 | 6.575 | -0.2363 | 0.2545  | -0.2630 |
| 1PE | C55 | 935 | 13.566 | 15.904 | 6.686 | -0.2183 | 0.2271  | -0.3058 |
| 1PE | C56 | 936 | 13.718 | 15.881 | 7.088 | -0.1659 | 0.1999  | -0.3345 |
| 1PE | C57 | 937 | 13.518 | 16.045 | 7.449 | -0.1461 | 0.1637  | -0.2930 |
| 1PE | C58 | 938 | 13.115 | 16.240 | 7.414 | -0.1464 | 0.1760  | -0.2463 |
| 1PE | C59 | 939 | 12.869 | 16.197 | 7.096 | -0.1841 | 0.1813  | -0.2010 |
| 1PE | C60 | 940 | 12.941 | 16.372 | 6.701 | -0.2183 | 0.2332  | -0.1822 |
| 1PE | C61 | 941 | 13.151 | 16.737 | 6.648 | -0.2388 | 0.2327  | -0.1956 |
| 1PE | C62 | 942 | 13.449 | 16.867 | 6.953 | -0.1975 | 0.2083  | -0.1942 |
| 1PE | C63 | 943 | 13.356 | 17.005 | 7.376 | -0.1682 | 0.1755  | -0.1763 |
| 1PE | C64 | 944 | 13.275 | 17.413 | 7.518 | -0.1408 | 0.1609  | -0.1262 |

|     |     |      |        |        |        |         |         |         |
|-----|-----|------|--------|--------|--------|---------|---------|---------|
| 1PE | C65 | 945  | 13.420 | 17.774 | 7.277  | -0.1928 | 0.1642  | -0.1177 |
| 1PE | C66 | 946  | 13.649 | 17.738 | 6.857  | -0.2190 | 0.2154  | -0.1451 |
| 1PE | C67 | 947  | 14.025 | 17.460 | 6.768  | -0.2337 | 0.2276  | -0.1922 |
| 1PE | C68 | 948  | 14.231 | 17.246 | 7.122  | -0.1806 | 0.2025  | -0.2472 |
| 1PE | C69 | 949  | 14.078 | 17.338 | 7.538  | -0.1422 | 0.1507  | -0.2258 |
| 1PE | C70 | 950  | 13.692 | 17.197 | 7.706  | -0.1255 | 0.1367  | -0.1990 |
| 1PE | C71 | 951  | 13.613 | 16.767 | 7.758  | -0.1216 | 0.1347  | -0.2427 |
| 1PE | C72 | 952  | 13.842 | 16.370 | 7.729  | -0.1226 | 0.1530  | -0.2929 |
| 1PE | C73 | 953  | 13.967 | 15.917 | 7.729  | -0.1247 | 0.1444  | -0.3495 |
| 1PE | C74 | 954  | 14.063 | 15.613 | 8.052  | -0.0668 | 0.1098  | -0.3857 |
| 1PE | C75 | 955  | 13.900 | 15.415 | 8.427  | -0.0432 | 0.0810  | -0.3883 |
| 1PE | C76 | 956  | 13.651 | 15.190 | 8.725  | 0.0030  | 0.0533  | -0.3898 |
| 1PE | C77 | 957  | 13.254 | 15.164 | 8.947  | 0.0186  | 0.0296  | -0.3509 |
| 1PE | C78 | 958  | 12.809 | 15.118 | 8.878  | 0.0125  | 0.0254  | -0.3115 |
| 1PE | C79 | 959  | 12.435 | 15.275 | 8.683  | -0.0217 | 0.0372  | -0.2423 |
| 1PE | C80 | 960  | 12.180 | 15.585 | 8.524  | -0.0211 | 0.0599  | -0.1949 |
| 1PE | C1  | 961  | 9.249  | 18.422 | 8.829  | -0.0349 | -0.0076 | 0.3567  |
| 1PE | C2  | 962  | 9.429  | 18.717 | 8.543  | -0.0693 | 0.0210  | 0.3757  |
| 1PE | C3  | 963  | 9.736  | 18.749 | 8.220  | -0.1037 | 0.0498  | 0.3412  |
| 1PE | C4  | 964  | 10.161 | 18.879 | 8.146  | -0.0885 | 0.0723  | 0.3174  |
| 1PE | C5  | 965  | 10.506 | 19.139 | 8.290  | -0.0866 | 0.0546  | 0.3059  |
| 1PE | C6  | 966  | 10.554 | 19.484 | 8.581  | -0.0573 | 0.0329  | 0.3351  |
| 1PE | C7  | 967  | 10.236 | 19.641 | 8.907  | -0.0228 | -0.0021 | 0.3819  |
| 1PE | C8  | 968  | 9.795  | 19.561 | 8.825  | -0.0463 | -0.0005 | 0.4136  |
| 1PE | C9  | 969  | 9.702  | 19.154 | 8.648  | -0.0469 | 0.0258  | 0.3954  |
| 1PE | C10 | 970  | 9.996  | 18.808 | 8.652  | -0.0510 | 0.0128  | 0.3327  |
| 1PE | C11 | 971  | 10.440 | 18.753 | 8.606  | -0.0515 | 0.0266  | 0.2675  |
| 1PE | C12 | 972  | 10.823 | 18.988 | 8.693  | -0.0403 | 0.0259  | 0.2724  |
| 1PE | C13 | 973  | 11.150 | 19.167 | 8.984  | -0.0115 | 0.0033  | 0.2368  |
| 1PE | C14 | 974  | 11.258 | 19.358 | 9.404  | 0.0325  | -0.0272 | 0.2485  |
| 1PE | C15 | 975  | 11.105 | 19.302 | 9.849  | 0.0538  | -0.0849 | 0.2657  |
| 1PE | C16 | 976  | 10.719 | 19.158 | 10.037 | 0.0882  | -0.1081 | 0.2882  |
| 1PE | C17 | 977  | 10.299 | 19.023 | 10.065 | 0.0896  | -0.1173 | 0.3232  |
| 1PE | C18 | 978  | 9.999  | 18.851 | 10.315 | 0.1123  | -0.1329 | 0.3460  |
| 1PE | C19 | 979  | 9.595  | 18.740 | 10.451 | 0.1324  | -0.1605 | 0.3706  |
| 1PE | C20 | 980  | 9.383  | 18.589 | 10.802 | 0.1680  | -0.2019 | 0.3696  |
| 1PE | C21 | 981  | 9.345  | 18.166 | 10.914 | 0.1793  | -0.1995 | 0.3266  |
| 1PE | C22 | 982  | 9.416  | 17.798 | 10.644 | 0.1613  | -0.1838 | 0.2951  |
| 1PE | C23 | 983  | 9.410  | 17.853 | 10.178 | 0.1095  | -0.1304 | 0.2785  |
| 1PE | C24 | 984  | 9.307  | 18.276 | 10.069 | 0.1001  | -0.1284 | 0.3601  |
| 1PE | C25 | 985  | 9.119  | 18.500 | 10.394 | 0.1276  | -0.1656 | 0.3901  |
| 1PE | C26 | 986  | 8.897  | 18.269 | 10.728 | 0.1552  | -0.2139 | 0.3788  |
| 1PE | C27 | 987  | 8.934  | 17.803 | 10.760 | 0.1669  | -0.1967 | 0.3349  |
| 1PE | C28 | 988  | 9.046  | 17.543 | 10.394 | 0.1319  | -0.1520 | 0.2884  |
| 1PE | C29 | 989  | 8.968  | 17.670 | 9.951  | 0.0877  | -0.0985 | 0.3204  |
| 1PE | C30 | 990  | 9.159  | 17.995 | 9.704  | 0.0673  | -0.1015 | 0.3361  |
| 1PE | C31 | 991  | 9.606  | 18.078 | 9.684  | 0.0640  | -0.0880 | 0.2881  |
| 1PE | C32 | 992  | 9.984  | 17.889 | 9.563  | 0.0357  | -0.0740 | 0.2528  |
| 1PE | C33 | 993  | 10.401 | 17.772 | 9.557  | 0.0551  | -0.0586 | 0.1831  |
| 1PE | C34 | 994  | 10.785 | 17.991 | 9.524  | 0.0370  | -0.0491 | 0.1713  |
| 1PE | C35 | 995  | 10.867 | 18.445 | 9.485  | 0.0394  | -0.0447 | 0.2057  |
| 1PE | C36 | 996  | 10.645 | 18.777 | 9.677  | 0.0506  | -0.0703 | 0.2623  |
| 1PE | C37 | 997  | 10.231 | 18.869 | 9.576  | 0.0474  | -0.0691 | 0.3205  |
| 1PE | C38 | 998  | 9.895  | 18.592 | 9.634  | 0.0450  | -0.0863 | 0.3048  |
| 1PE | C39 | 999  | 9.774  | 18.481 | 10.042 | 0.0856  | -0.1164 | 0.3237  |
| 1PE | C40 | 1000 | 10.087 | 18.371 | 10.420 | 0.1257  | -0.1477 | 0.2650  |
| 1PE | C41 | 1001 | 10.337 | 18.663 | 10.658 | 0.1513  | -0.1732 | 0.2702  |
| 1PE | C42 | 1002 | 10.482 | 19.091 | 10.548 | 0.1480  | -0.1589 | 0.3024  |
| 1PE | C43 | 1003 | 10.342 | 19.450 | 10.313 | 0.1074  | -0.1353 | 0.3582  |
| 1PE | C44 | 1004 | 10.029 | 19.544 | 9.994  | 0.0905  | -0.1159 | 0.3806  |
| 1PE | C45 | 1005 | 9.625  | 19.496 | 9.817  | 0.0705  | -0.1034 | 0.4449  |
| 1PE | C46 | 1006 | 9.270  | 19.246 | 9.850  | 0.0545  | -0.1121 | 0.4461  |
| 1PE | C47 | 1007 | 9.063  | 18.934 | 9.604  | 0.0488  | -0.0844 | 0.4289  |
| 1PE | C48 | 1008 | 9.185  | 18.776 | 9.206  | -0.0062 | -0.0314 | 0.3898  |
| 1PE | C49 | 1009 | 9.580  | 18.822 | 9.021  | -0.0236 | -0.0173 | 0.3623  |
| 1PE | C50 | 1010 | 9.984  | 18.714 | 9.149  | 0.0050  | -0.0192 | 0.3303  |
| 1PE | C51 | 1011 | 10.427 | 18.660 | 9.154  | 0.0041  | -0.0288 | 0.2684  |
| 1PE | C52 | 1012 | 10.744 | 18.900 | 9.185  | 0.0014  | -0.0329 | 0.2741  |
| 1PE | C53 | 1013 | 10.767 | 19.222 | 9.496  | 0.0340  | -0.0509 | 0.2876  |
| 1PE | C54 | 1014 | 10.396 | 19.364 | 9.703  | 0.0594  | -0.0830 | 0.3475  |
| 1PE | C55 | 1015 | 9.986  | 19.307 | 9.528  | 0.0356  | -0.0686 | 0.3767  |
| 1PE | C56 | 1016 | 9.959  | 19.194 | 9.111  | -0.0046 | -0.0350 | 0.3647  |
| 1PE | C57 | 1017 | 10.340 | 19.129 | 8.907  | -0.0157 | -0.0156 | 0.3297  |

|     |     |      |        |        |        |         |         |         |
|-----|-----|------|--------|--------|--------|---------|---------|---------|
| 1PE | C58 | 1018 | 10.680 | 19.388 | 9.043  | -0.0048 | -0.0053 | 0.3086  |
| 1PE | C59 | 1019 | 10.577 | 19.700 | 9.355  | 0.0077  | -0.0430 | 0.3459  |
| 1PE | C60 | 1020 | 10.144 | 19.785 | 9.501  | 0.0253  | -0.0565 | 0.4021  |
| 1PE | C61 | 1021 | 9.727  | 19.706 | 9.317  | 0.0201  | -0.0441 | 0.4472  |
| 1PE | C62 | 1022 | 9.490  | 19.316 | 9.261  | 0.0117  | -0.0506 | 0.4228  |
| 1PE | C63 | 1023 | 9.597  | 18.973 | 9.502  | 0.0330  | -0.0616 | 0.3901  |
| 1PE | C64 | 1024 | 9.785  | 19.013 | 9.897  | 0.0699  | -0.0938 | 0.3750  |
| 1PE | C65 | 1025 | 9.647  | 19.222 | 10.273 | 0.1058  | -0.1492 | 0.4090  |
| 1PE | C66 | 1026 | 9.515  | 19.189 | 10.722 | 0.1446  | -0.1899 | 0.4037  |
| 1PE | C67 | 1027 | 9.193  | 19.019 | 10.977 | 0.1742  | -0.2023 | 0.4374  |
| 1PE | C68 | 1028 | 8.856  | 18.774 | 10.846 | 0.1649  | -0.1862 | 0.4484  |
| 1PE | C69 | 1029 | 8.686  | 18.757 | 10.436 | 0.1326  | -0.1698 | 0.4604  |
| 1PE | C70 | 1030 | 8.840  | 18.705 | 10.017 | 0.0897  | -0.1261 | 0.4302  |
| 1PE | C71 | 1031 | 8.913  | 18.446 | 9.656  | 0.0478  | -0.0871 | 0.3945  |
| 1PE | C72 | 1032 | 9.072  | 18.249 | 9.272  | 0.0103  | -0.0586 | 0.3659  |
| 1PE | C73 | 1033 | 9.009  | 17.969 | 8.899  | -0.0217 | -0.0196 | 0.3464  |
| 1PE | C74 | 1034 | 9.178  | 18.009 | 8.456  | -0.0611 | 0.0355  | 0.3305  |
| 1PE | C75 | 1035 | 9.577  | 18.263 | 8.416  | -0.0652 | 0.0392  | 0.3043  |
| 1PE | C76 | 1036 | 9.755  | 18.394 | 8.805  | -0.0400 | -0.0084 | 0.3045  |
| 1PE | C77 | 1037 | 9.597  | 18.356 | 9.237  | 0.0068  | -0.0359 | 0.3385  |
| 1PE | C78 | 1038 | 9.399  | 18.528 | 9.617  | 0.0376  | -0.0927 | 0.3537  |
| 1PE | C79 | 1039 | 9.349  | 18.774 | 10.001 | 0.0652  | -0.1215 | 0.3966  |
| 1PE | C80 | 1040 | 9.166  | 19.005 | 10.357 | 0.1244  | -0.1487 | 0.4329  |
| 1PE | C1  | 1041 | 11.327 | 15.546 | 7.561  | -0.1390 | 0.1313  | -0.1200 |
| 1PE | C2  | 1042 | 11.032 | 15.249 | 7.421  | -0.1458 | 0.1485  | -0.1237 |
| 1PE | C3  | 1043 | 10.886 | 14.889 | 7.644  | -0.1172 | 0.1027  | -0.1282 |
| 1PE | C4  | 1044 | 11.077 | 14.746 | 8.039  | -0.0699 | 0.0751  | -0.1542 |
| 1PE | C5  | 1045 | 11.480 | 14.534 | 8.031  | -0.0698 | 0.0852  | -0.2285 |
| 1PE | C6  | 1046 | 11.739 | 14.481 | 7.641  | -0.1120 | 0.1319  | -0.2524 |
| 1PE | C7  | 1047 | 11.741 | 14.590 | 7.198  | -0.1591 | 0.1743  | -0.2472 |
| 1PE | C8  | 1048 | 11.573 | 14.853 | 6.858  | -0.1789 | 0.2002  | -0.2087 |
| 1PE | C9  | 1049 | 11.654 | 15.122 | 6.509  | -0.2159 | 0.2503  | -0.1904 |
| 1PE | C10 | 1050 | 11.568 | 15.540 | 6.376  | -0.2398 | 0.2449  | -0.1404 |
| 1PE | C11 | 1051 | 11.218 | 15.811 | 6.494  | -0.2499 | 0.2351  | -0.0842 |
| 1PE | C12 | 1052 | 10.832 | 15.681 | 6.671  | -0.2242 | 0.2090  | -0.0554 |
| 1PE | C13 | 1053 | 10.786 | 15.315 | 6.953  | -0.1844 | 0.1929  | -0.0902 |
| 1PE | C14 | 1054 | 11.059 | 14.945 | 7.027  | -0.1890 | 0.1801  | -0.1564 |
| 1PE | C15 | 1055 | 11.348 | 14.842 | 7.361  | -0.1390 | 0.1533  | -0.1774 |
| 1PE | C16 | 1056 | 11.383 | 15.046 | 7.753  | -0.1106 | 0.1031  | -0.1650 |
| 1PE | C17 | 1057 | 11.063 | 15.281 | 7.941  | -0.0941 | 0.0875  | -0.1313 |
| 1PE | C18 | 1058 | 10.660 | 15.323 | 7.777  | -0.1189 | 0.1291  | -0.0761 |
| 1PE | C19 | 1059 | 10.472 | 15.392 | 7.364  | -0.1444 | 0.1412  | -0.0465 |
| 1PE | C20 | 1060 | 10.495 | 15.741 | 7.057  | -0.1826 | 0.1737  | -0.0116 |
| 1PE | C21 | 1061 | 10.785 | 16.084 | 7.013  | -0.1765 | 0.1819  | -0.0095 |
| 1PE | C22 | 1062 | 11.212 | 16.152 | 6.901  | -0.2011 | 0.1874  | -0.0502 |
| 1PE | C23 | 1063 | 11.610 | 16.293 | 6.865  | -0.2117 | 0.2103  | -0.0601 |
| 1PE | C24 | 1064 | 11.778 | 16.706 | 6.959  | -0.1972 | 0.2020  | -0.0517 |
| 1PE | C25 | 1065 | 11.529 | 17.032 | 7.112  | -0.1830 | 0.1831  | -0.0028 |
| 1PE | C26 | 1066 | 11.104 | 17.030 | 7.278  | -0.1820 | 0.1554  | 0.0468  |
| 1PE | C27 | 1067 | 10.819 | 16.949 | 6.989  | -0.2113 | 0.1782  | 0.0530  |
| 1PE | C28 | 1068 | 10.981 | 17.056 | 6.599  | -0.2372 | 0.2298  | 0.0622  |
| 1PE | C29 | 1069 | 11.440 | 17.161 | 6.574  | -0.2417 | 0.2299  | 0.0375  |
| 1PE | C30 | 1070 | 11.716 | 17.398 | 6.868  | -0.2182 | 0.1989  | 0.0116  |
| 1PE | C31 | 1071 | 11.644 | 17.442 | 7.358  | -0.1576 | 0.1678  | 0.0350  |
| 1PE | C32 | 1072 | 11.327 | 17.351 | 7.664  | -0.1509 | 0.1288  | 0.0622  |
| 1PE | C33 | 1073 | 10.912 | 17.176 | 7.765  | -0.1268 | 0.1148  | 0.0744  |
| 1PE | C34 | 1074 | 10.699 | 16.819 | 7.567  | -0.1361 | 0.1230  | 0.0614  |
| 1PE | C35 | 1075 | 10.898 | 16.533 | 7.248  | -0.1731 | 0.1727  | 0.0223  |
| 1PE | C36 | 1076 | 11.339 | 16.564 | 7.252  | -0.1795 | 0.1599  | -0.0255 |
| 1PE | C37 | 1077 | 11.476 | 16.870 | 7.562  | -0.1269 | 0.1259  | -0.0126 |
| 1PE | C38 | 1078 | 11.257 | 16.876 | 7.960  | -0.0926 | 0.0986  | 0.0101  |
| 1PE | C39 | 1079 | 10.933 | 16.588 | 8.007  | -0.1006 | 0.0703  | 0.0235  |
| 1PE | C40 | 1080 | 10.858 | 16.312 | 7.678  | -0.1166 | 0.1218  | -0.0020 |
| 1PE | C41 | 1081 | 11.163 | 16.108 | 7.414  | -0.1364 | 0.1393  | -0.0397 |
| 1PE | C42 | 1082 | 11.557 | 15.911 | 7.318  | -0.1600 | 0.1606  | -0.0984 |
| 1PE | C43 | 1083 | 11.927 | 15.946 | 7.067  | -0.1715 | 0.1904  | -0.1395 |
| 1PE | C44 | 1084 | 12.103 | 16.325 | 6.983  | -0.1945 | 0.1943  | -0.1141 |
| 1PE | C45 | 1085 | 12.158 | 16.663 | 7.294  | -0.1735 | 0.1517  | -0.0914 |
| 1PE | C46 | 1086 | 12.183 | 16.580 | 7.728  | -0.1325 | 0.1229  | -0.0982 |
| 1PE | C47 | 1087 | 11.910 | 16.278 | 7.946  | -0.1096 | 0.1018  | -0.1035 |
| 1PE | C48 | 1088 | 11.632 | 15.947 | 7.829  | -0.1005 | 0.1138  | -0.0998 |
| 1PE | C49 | 1089 | 11.349 | 15.685 | 8.043  | -0.0725 | 0.0928  | -0.0901 |
| 1PE | C50 | 1090 | 11.365 | 15.398 | 8.334  | -0.0468 | 0.0644  | -0.1385 |

|          |          |          |        |        |       |         |        |         |
|----------|----------|----------|--------|--------|-------|---------|--------|---------|
| 1PE      | C51      | 1091     | 11.513 | 14.994 | 8.264 | -0.0483 | 0.0538 | -0.1898 |
| 1PE      | C52      | 1092     | 11.815 | 14.886 | 7.949 | -0.0847 | 0.0839 | -0.2280 |
| 1PE      | C53      | 1093     | 11.847 | 14.984 | 7.526 | -0.1211 | 0.1493 | -0.2313 |
| 1PE      | C54      | 1094     | 11.916 | 15.101 | 7.124 | -0.1683 | 0.1737 | -0.2138 |
| 1PE      | C55      | 1095     | 11.879 | 15.447 | 6.870 | -0.2004 | 0.2072 | -0.1754 |
| 1PE      | C56      | 1096     | 11.529 | 15.729 | 6.861 | -0.2045 | 0.2175 | -0.1301 |
| 1PE      | C57      | 1097     | 11.131 | 15.692 | 7.072 | -0.1840 | 0.1856 | -0.0841 |
| 1PE      | C58      | 1098     | 10.862 | 15.713 | 7.403 | -0.1484 | 0.1393 | -0.0605 |
| 1PE      | C59      | 1099     | 10.937 | 15.791 | 7.809 | -0.1283 | 0.1169 | -0.0734 |
| 1PE      | C60      | 1100     | 11.188 | 16.140 | 7.984 | -0.0895 | 0.1006 | -0.0353 |
| 1PE      | C61      | 1101     | 11.408 | 16.420 | 7.741 | -0.1216 | 0.1250 | -0.0545 |
| 1PE      | C62      | 1102     | 11.768 | 16.343 | 7.468 | -0.1487 | 0.1521 | -0.0758 |
| 1PE      | C63      | 1103     | 12.051 | 15.978 | 7.540 | -0.1453 | 0.1393 | -0.1523 |
| 1PE      | C64      | 1104     | 12.097 | 15.700 | 7.900 | -0.1011 | 0.1062 | -0.1761 |
| 1PE      | C65      | 1105     | 11.785 | 15.726 | 8.256 | -0.0601 | 0.0698 | -0.1474 |
| 1PE      | C66      | 1106     | 11.549 | 16.074 | 8.326 | -0.0496 | 0.0652 | -0.0796 |
| 1PE      | C67      | 1107     | 11.536 | 16.501 | 8.217 | -0.0639 | 0.0637 | -0.0406 |
| 1PE      | C68      | 1108     | 11.763 | 16.767 | 7.933 | -0.1085 | 0.1093 | -0.0364 |
| 1PE      | C69      | 1109     | 11.940 | 17.021 | 7.599 | -0.1435 | 0.1262 | -0.0316 |
| 1PE      | C70      | 1110     | 12.028 | 17.137 | 7.186 | -0.1786 | 0.1734 | -0.0169 |
| 1PE      | C71      | 1111     | 12.196 | 16.979 | 6.820 | -0.2159 | 0.2094 | -0.0777 |
| 1PE      | C72      | 1112     | 12.171 | 16.641 | 6.563 | -0.2469 | 0.2194 | -0.0906 |
| 1PE      | C73      | 1113     | 11.960 | 16.265 | 6.500 | -0.2437 | 0.2302 | -0.1082 |
| 1PE      | C74      | 1114     | 11.921 | 15.839 | 6.559 | -0.2289 | 0.2311 | -0.1531 |
| 1PE      | C75      | 1115     | 12.051 | 15.417 | 6.374 | -0.2348 | 0.2487 | -0.2174 |
| 1PE      | C76      | 1116     | 11.868 | 15.189 | 6.037 | -0.2802 | 0.2695 | -0.2093 |
| 1PE      | C77      | 1117     | 11.415 | 15.228 | 5.953 | -0.2817 | 0.2953 | -0.1543 |
| 1PE      | C78      | 1118     | 11.125 | 15.333 | 6.297 | -0.2525 | 0.2485 | -0.1271 |
| 1PE      | C79      | 1119     | 11.243 | 15.331 | 6.730 | -0.2046 | 0.2064 | -0.1217 |
| 1PE      | C80      | 1120     | 11.455 | 15.292 | 7.130 | -0.1670 | 0.1755 | -0.1604 |
| 20.31205 | 20.31205 | 20.31205 |        |        |       |         |        |         |

## 3.2 Polyethylene NP System Topology

```
#include "martini_v2.0_PEO_PS_CNP.itp"

#include "PE160.itp"

[ system ]
; name
  POLYETHYLENE

[ molecules ]
; name          number
PE              14
```

## 3.3 Polyethylene NP Topology

```
[moleculetype]
; molname      nrexcl
PE              3

[atoms]
; id  type    resnr  residu  atom    cgnr    charge
1  C1         1  PE  C1         1         0
2  C1         1  PE  C2         2         0
3  C1         1  PE  C3         3         0
4  C1         1  PE  C4         4         0
5  C1         1  PE  C5         5         0
6  C1         1  PE  C6         6         0
7  C1         1  PE  C7         7         0
8  C1         1  PE  C8         8         0
9  C1         1  PE  C9         9         0
10 C1         1  PE C10        10         0
11 C1         1  PE C11        11         0
12 C1         1  PE C12        12         0
13 C1         1  PE C13        13         0
14 C1         1  PE C14        14         0
15 C1         1  PE C15        15         0
16 C1         1  PE C16        16         0
17 C1         1  PE C17        17         0
18 C1         1  PE C18        18         0
19 C1         1  PE C19        19         0
20 C1         1  PE C20        20         0
21 C1         1  PE C21        21         0
22 C1         1  PE C22        22         0
23 C1         1  PE C23        23         0
24 C1         1  PE C24        24         0
25 C1         1  PE C25        25         0
26 C1         1  PE C26        26         0
27 C1         1  PE C27        27         0
28 C1         1  PE C28        28         0
29 C1         1  PE C29        29         0
30 C1         1  PE C30        30         0
31 C1         1  PE C31        31         0
32 C1         1  PE C32        32         0
33 C1         1  PE C33        33         0
34 C1         1  PE C34        34         0
35 C1         1  PE C35        35         0
36 C1         1  PE C36        36         0
37 C1         1  PE C37        37         0
38 C1         1  PE C38        38         0
39 C1         1  PE C39        39         0
40 C1         1  PE C40        40         0
41 C1         1  PE C41        41         0
42 C1         1  PE C42        42         0
43 C1         1  PE C43        43         0
44 C1         1  PE C44        44         0
45 C1         1  PE C45        45         0
46 C1         1  PE C46        46         0
47 C1         1  PE C47        47         0
```

|       |          |    |   |
|-------|----------|----|---|
| 48 C1 | 1 PE C48 | 48 | 0 |
| 49 C1 | 1 PE C49 | 49 | 0 |
| 50 C1 | 1 PE C50 | 50 | 0 |
| 51 C1 | 1 PE C51 | 51 | 0 |
| 52 C1 | 1 PE C52 | 52 | 0 |
| 53 C1 | 1 PE C53 | 53 | 0 |
| 54 C1 | 1 PE C54 | 54 | 0 |
| 55 C1 | 1 PE C55 | 55 | 0 |
| 56 C1 | 1 PE C56 | 56 | 0 |
| 57 C1 | 1 PE C57 | 57 | 0 |
| 58 C1 | 1 PE C58 | 58 | 0 |
| 59 C1 | 1 PE C59 | 59 | 0 |
| 60 C1 | 1 PE C60 | 60 | 0 |
| 61 C1 | 1 PE C61 | 61 | 0 |
| 62 C1 | 1 PE C62 | 62 | 0 |
| 63 C1 | 1 PE C63 | 63 | 0 |
| 64 C1 | 1 PE C64 | 64 | 0 |
| 65 C1 | 1 PE C65 | 65 | 0 |
| 66 C1 | 1 PE C66 | 66 | 0 |
| 67 C1 | 1 PE C67 | 67 | 0 |
| 68 C1 | 1 PE C68 | 68 | 0 |
| 69 C1 | 1 PE C69 | 69 | 0 |
| 70 C1 | 1 PE C70 | 70 | 0 |
| 71 C1 | 1 PE C71 | 71 | 0 |
| 72 C1 | 1 PE C72 | 72 | 0 |
| 73 C1 | 1 PE C73 | 73 | 0 |
| 74 C1 | 1 PE C74 | 74 | 0 |
| 75 C1 | 1 PE C75 | 75 | 0 |
| 76 C1 | 1 PE C76 | 76 | 0 |
| 77 C1 | 1 PE C77 | 77 | 0 |
| 78 C1 | 1 PE C78 | 78 | 0 |
| 79 C1 | 1 PE C79 | 79 | 0 |
| 80 C1 | 1 PE C80 | 80 | 0 |

[bonds]

| ; i j | funct | length | force.c. |            |      |
|-------|-------|--------|----------|------------|------|
|       | 1     | 2      | 1        | 0.46000001 | 2000 |
|       | 2     | 3      | 1        | 0.46000001 | 2000 |
|       | 3     | 4      | 1        | 0.46000001 | 2000 |
|       | 4     | 5      | 1        | 0.46000001 | 2000 |
|       | 5     | 6      | 1        | 0.46000001 | 2000 |
|       | 6     | 7      | 1        | 0.46000001 | 2000 |
|       | 7     | 8      | 1        | 0.46000001 | 2000 |
|       | 8     | 9      | 1        | 0.46000001 | 2000 |
|       | 9     | 10     | 1        | 0.46000001 | 2000 |
|       | 10    | 11     | 1        | 0.46000001 | 2000 |
|       | 11    | 12     | 1        | 0.46000001 | 2000 |
|       | 12    | 13     | 1        | 0.46000001 | 2000 |
|       | 13    | 14     | 1        | 0.46000001 | 2000 |
|       | 14    | 15     | 1        | 0.46000001 | 2000 |
|       | 15    | 16     | 1        | 0.46000001 | 2000 |
|       | 16    | 17     | 1        | 0.46000001 | 2000 |
|       | 17    | 18     | 1        | 0.46000001 | 2000 |
|       | 18    | 19     | 1        | 0.46000001 | 2000 |
|       | 19    | 20     | 1        | 0.46000001 | 2000 |
|       | 20    | 21     | 1        | 0.46000001 | 2000 |
|       | 21    | 22     | 1        | 0.46000001 | 2000 |
|       | 22    | 23     | 1        | 0.46000001 | 2000 |
|       | 23    | 24     | 1        | 0.46000001 | 2000 |
|       | 24    | 25     | 1        | 0.46000001 | 2000 |
|       | 25    | 26     | 1        | 0.46000001 | 2000 |
|       | 26    | 27     | 1        | 0.46000001 | 2000 |
|       | 27    | 28     | 1        | 0.46000001 | 2000 |
|       | 28    | 29     | 1        | 0.46000001 | 2000 |
|       | 29    | 30     | 1        | 0.46000001 | 2000 |
|       | 30    | 31     | 1        | 0.46000001 | 2000 |
|       | 31    | 32     | 1        | 0.46000001 | 2000 |
|       | 32    | 33     | 1        | 0.46000001 | 2000 |
|       | 33    | 34     | 1        | 0.46000001 | 2000 |
|       | 34    | 35     | 1        | 0.46000001 | 2000 |
|       | 35    | 36     | 1        | 0.46000001 | 2000 |
|       | 36    | 37     | 1        | 0.46000001 | 2000 |
|       | 37    | 38     | 1        | 0.46000001 | 2000 |

|    |    |   |            |      |
|----|----|---|------------|------|
| 38 | 39 | 1 | 0.46000001 | 2000 |
| 39 | 40 | 1 | 0.46000001 | 2000 |
| 40 | 41 | 1 | 0.46000001 | 2000 |
| 41 | 42 | 1 | 0.46000001 | 2000 |
| 42 | 43 | 1 | 0.46000001 | 2000 |
| 43 | 44 | 1 | 0.46000001 | 2000 |
| 44 | 45 | 1 | 0.46000001 | 2000 |
| 45 | 46 | 1 | 0.46000001 | 2000 |
| 46 | 47 | 1 | 0.46000001 | 2000 |
| 47 | 48 | 1 | 0.46000001 | 2000 |
| 48 | 49 | 1 | 0.46000001 | 2000 |
| 49 | 50 | 1 | 0.46000001 | 2000 |
| 50 | 51 | 1 | 0.46000001 | 2000 |
| 51 | 52 | 1 | 0.46000001 | 2000 |
| 52 | 53 | 1 | 0.46000001 | 2000 |
| 53 | 54 | 1 | 0.46000001 | 2000 |
| 54 | 55 | 1 | 0.46000001 | 2000 |
| 55 | 56 | 1 | 0.46000001 | 2000 |
| 56 | 57 | 1 | 0.46000001 | 2000 |
| 57 | 58 | 1 | 0.46000001 | 2000 |
| 58 | 59 | 1 | 0.46000001 | 2000 |
| 59 | 60 | 1 | 0.46000001 | 2000 |
| 60 | 61 | 1 | 0.46000001 | 2000 |
| 61 | 62 | 1 | 0.46000001 | 2000 |
| 62 | 63 | 1 | 0.46000001 | 2000 |
| 63 | 64 | 1 | 0.46000001 | 2000 |
| 64 | 65 | 1 | 0.46000001 | 2000 |
| 65 | 66 | 1 | 0.46000001 | 2000 |
| 66 | 67 | 1 | 0.46000001 | 2000 |
| 67 | 68 | 1 | 0.46000001 | 2000 |
| 68 | 69 | 1 | 0.46000001 | 2000 |
| 69 | 70 | 1 | 0.46000001 | 2000 |
| 70 | 71 | 1 | 0.46000001 | 2000 |
| 71 | 72 | 1 | 0.46000001 | 2000 |
| 72 | 73 | 1 | 0.46000001 | 2000 |
| 73 | 74 | 1 | 0.46000001 | 2000 |
| 74 | 75 | 1 | 0.46000001 | 2000 |
| 75 | 76 | 1 | 0.46000001 | 2000 |
| 76 | 77 | 1 | 0.46000001 | 2000 |
| 77 | 78 | 1 | 0.46000001 | 2000 |
| 78 | 79 | 1 | 0.46000001 | 2000 |
| 79 | 80 | 1 | 0.46000001 | 2000 |

[angles]

| ; i j k | funct | angle | force.c. |           |           |  |
|---------|-------|-------|----------|-----------|-----------|--|
| 1       | 2     | 3     | 2        | 180.00000 | 82.000000 |  |
| 2       | 3     | 4     | 2        | 180.00000 | 82.000000 |  |
| 3       | 4     | 5     | 2        | 180.00000 | 82.000000 |  |
| 4       | 5     | 6     | 2        | 180.00000 | 82.000000 |  |
| 5       | 6     | 7     | 2        | 180.00000 | 82.000000 |  |
| 6       | 7     | 8     | 2        | 180.00000 | 82.000000 |  |
| 7       | 8     | 9     | 2        | 180.00000 | 82.000000 |  |
| 8       | 9     | 10    | 2        | 180.00000 | 82.000000 |  |
| 9       | 10    | 11    | 2        | 180.00000 | 82.000000 |  |
| 10      | 11    | 12    | 2        | 180.00000 | 82.000000 |  |
| 11      | 12    | 13    | 2        | 180.00000 | 82.000000 |  |
| 12      | 13    | 14    | 2        | 180.00000 | 82.000000 |  |
| 13      | 14    | 15    | 2        | 180.00000 | 82.000000 |  |
| 14      | 15    | 16    | 2        | 180.00000 | 82.000000 |  |
| 15      | 16    | 17    | 2        | 180.00000 | 82.000000 |  |
| 16      | 17    | 18    | 2        | 180.00000 | 82.000000 |  |
| 17      | 18    | 19    | 2        | 180.00000 | 82.000000 |  |
| 18      | 19    | 20    | 2        | 180.00000 | 82.000000 |  |
| 19      | 20    | 21    | 2        | 180.00000 | 82.000000 |  |
| 20      | 21    | 22    | 2        | 180.00000 | 82.000000 |  |
| 21      | 22    | 23    | 2        | 180.00000 | 82.000000 |  |
| 22      | 23    | 24    | 2        | 180.00000 | 82.000000 |  |
| 23      | 24    | 25    | 2        | 180.00000 | 82.000000 |  |
| 24      | 25    | 26    | 2        | 180.00000 | 82.000000 |  |
| 25      | 26    | 27    | 2        | 180.00000 | 82.000000 |  |
| 26      | 27    | 28    | 2        | 180.00000 | 82.000000 |  |
| 27      | 28    | 29    | 2        | 180.00000 | 82.000000 |  |
| 28      | 29    | 30    | 2        | 180.00000 | 82.000000 |  |



|    |    |    |   |            |           |
|----|----|----|---|------------|-----------|
| 29 | 30 | 31 | 2 | 180.000000 | 82.000000 |
| 30 | 31 | 32 | 2 | 180.000000 | 82.000000 |
| 31 | 32 | 33 | 2 | 180.000000 | 82.000000 |
| 32 | 33 | 34 | 2 | 180.000000 | 82.000000 |
| 33 | 34 | 35 | 2 | 180.000000 | 82.000000 |
| 34 | 35 | 36 | 2 | 180.000000 | 82.000000 |
| 35 | 36 | 37 | 2 | 180.000000 | 82.000000 |
| 36 | 37 | 38 | 2 | 180.000000 | 82.000000 |
| 37 | 38 | 39 | 2 | 180.000000 | 82.000000 |
| 38 | 39 | 40 | 2 | 180.000000 | 82.000000 |
| 39 | 40 | 41 | 2 | 180.000000 | 82.000000 |
| 40 | 41 | 42 | 2 | 180.000000 | 82.000000 |
| 41 | 42 | 43 | 2 | 180.000000 | 82.000000 |
| 42 | 43 | 44 | 2 | 180.000000 | 82.000000 |
| 43 | 44 | 45 | 2 | 180.000000 | 82.000000 |
| 44 | 45 | 46 | 2 | 180.000000 | 82.000000 |
| 45 | 46 | 47 | 2 | 180.000000 | 82.000000 |
| 46 | 47 | 48 | 2 | 180.000000 | 82.000000 |
| 47 | 48 | 49 | 2 | 180.000000 | 82.000000 |
| 48 | 49 | 50 | 2 | 180.000000 | 82.000000 |
| 49 | 50 | 51 | 2 | 180.000000 | 82.000000 |
| 50 | 51 | 52 | 2 | 180.000000 | 82.000000 |
| 51 | 52 | 53 | 2 | 180.000000 | 82.000000 |
| 52 | 53 | 54 | 2 | 180.000000 | 82.000000 |
| 53 | 54 | 55 | 2 | 180.000000 | 82.000000 |
| 54 | 55 | 56 | 2 | 180.000000 | 82.000000 |
| 55 | 56 | 57 | 2 | 180.000000 | 82.000000 |
| 56 | 57 | 58 | 2 | 180.000000 | 82.000000 |
| 57 | 58 | 59 | 2 | 180.000000 | 82.000000 |
| 58 | 59 | 60 | 2 | 180.000000 | 82.000000 |
| 59 | 60 | 61 | 2 | 180.000000 | 82.000000 |
| 60 | 61 | 62 | 2 | 180.000000 | 82.000000 |
| 61 | 62 | 63 | 2 | 180.000000 | 82.000000 |
| 62 | 63 | 64 | 2 | 180.000000 | 82.000000 |
| 63 | 64 | 65 | 2 | 180.000000 | 82.000000 |
| 64 | 65 | 66 | 2 | 180.000000 | 82.000000 |
| 65 | 66 | 67 | 2 | 180.000000 | 82.000000 |
| 66 | 67 | 68 | 2 | 180.000000 | 82.000000 |
| 67 | 68 | 69 | 2 | 180.000000 | 82.000000 |
| 68 | 69 | 70 | 2 | 180.000000 | 82.000000 |
| 69 | 70 | 71 | 2 | 180.000000 | 82.000000 |
| 70 | 71 | 72 | 2 | 180.000000 | 82.000000 |
| 71 | 72 | 73 | 2 | 180.000000 | 82.000000 |
| 72 | 73 | 74 | 2 | 180.000000 | 82.000000 |
| 73 | 74 | 75 | 2 | 180.000000 | 82.000000 |
| 74 | 75 | 76 | 2 | 180.000000 | 82.000000 |
| 75 | 76 | 77 | 2 | 180.000000 | 82.000000 |
| 76 | 77 | 78 | 2 | 180.000000 | 82.000000 |
| 77 | 78 | 79 | 2 | 180.000000 | 82.000000 |
| 78 | 79 | 80 | 2 | 180.000000 | 82.000000 |

| [dihedrals]    |    |    |    |           |    |    |    |            |           |            |                 |
|----------------|----|----|----|-----------|----|----|----|------------|-----------|------------|-----------------|
| i              | j  | k  | h  | funct     | c0 | c1 | c2 | c3         | c4        | c5         |                 |
| 1              | 2  | 3  | 4  |           |    |    | 11 | -19.665600 | 0.5092800 | 1.12000000 | -4.40827012E-02 |
| 2.01571006E-02 |    |    |    | 0.0000000 |    |    |    |            |           |            |                 |
| 2              | 3  | 4  | 5  |           |    |    | 11 | -19.665600 | 0.5092800 | 1.12000000 | -4.40827012E-02 |
| 2.01571006E-02 |    |    |    | 0.0000000 |    |    |    |            |           |            |                 |
| 3              | 4  | 5  | 6  |           |    |    | 11 | -19.665600 | 0.5092800 | 1.12000000 | -4.40827012E-02 |
| 2.01571006E-02 |    |    |    | 0.0000000 |    |    |    |            |           |            |                 |
| 4              | 5  | 6  | 7  |           |    |    | 11 | -19.665600 | 0.5092800 | 1.12000000 | -4.40827012E-02 |
| 2.01571006E-02 |    |    |    | 0.0000000 |    |    |    |            |           |            |                 |
| 5              | 6  | 7  | 8  |           |    |    | 11 | -19.665600 | 0.5092800 | 1.12000000 | -4.40827012E-02 |
| 2.01571006E-02 |    |    |    | 0.0000000 |    |    |    |            |           |            |                 |
| 6              | 7  | 8  | 9  |           |    |    | 11 | -19.665600 | 0.5092800 | 1.12000000 | -4.40827012E-02 |
| 2.01571006E-02 |    |    |    | 0.0000000 |    |    |    |            |           |            |                 |
| 7              | 8  | 9  | 10 |           |    |    | 11 | -19.665600 | 0.5092800 | 1.12000000 | -4.40827012E-02 |
| 2.01571006E-02 |    |    |    | 0.0000000 |    |    |    |            |           |            |                 |
| 8              | 9  | 10 | 11 |           |    |    | 11 | -19.665600 | 0.5092800 | 1.12000000 | -4.40827012E-02 |
| 2.01571006E-02 |    |    |    | 0.0000000 |    |    |    |            |           |            |                 |
| 9              | 10 | 11 | 12 |           |    |    | 11 | -19.665600 | 0.5092800 | 1.12000000 | -4.40827012E-02 |
| 2.01571006E-02 |    |    |    | 0.0000000 |    |    |    |            |           |            |                 |
| 10             | 11 | 12 | 13 |           |    |    | 11 | -19.665600 | 0.5092800 | 1.12000000 | -4.40827012E-02 |
| 2.01571006E-02 |    |    |    | 0.0000000 |    |    |    |            |           |            |                 |

|                |    |    |    |           |    |            |           |            |                 |   |
|----------------|----|----|----|-----------|----|------------|-----------|------------|-----------------|---|
|                | 11 | 12 | 13 | 14        | 11 | -19.665600 | 0.5092800 | 1.12000000 | -4.40827012E-02 | - |
| 2.01571006E-02 |    |    |    | 0.0000000 |    |            |           |            |                 |   |
|                | 12 | 13 | 14 | 15        | 11 | -19.665600 | 0.5092800 | 1.12000000 | -4.40827012E-02 | - |
| 2.01571006E-02 |    |    |    | 0.0000000 |    |            |           |            |                 |   |
|                | 13 | 14 | 15 | 16        | 11 | -19.665600 | 0.5092800 | 1.12000000 | -4.40827012E-02 | - |
| 2.01571006E-02 |    |    |    | 0.0000000 |    |            |           |            |                 |   |
|                | 14 | 15 | 16 | 17        | 11 | -19.665600 | 0.5092800 | 1.12000000 | -4.40827012E-02 | - |
| 2.01571006E-02 |    |    |    | 0.0000000 |    |            |           |            |                 |   |
|                | 15 | 16 | 17 | 18        | 11 | -19.665600 | 0.5092800 | 1.12000000 | -4.40827012E-02 | - |
| 2.01571006E-02 |    |    |    | 0.0000000 |    |            |           |            |                 |   |
|                | 16 | 17 | 18 | 19        | 11 | -19.665600 | 0.5092800 | 1.12000000 | -4.40827012E-02 | - |
| 2.01571006E-02 |    |    |    | 0.0000000 |    |            |           |            |                 |   |
|                | 17 | 18 | 19 | 20        | 11 | -19.665600 | 0.5092800 | 1.12000000 | -4.40827012E-02 | - |
| 2.01571006E-02 |    |    |    | 0.0000000 |    |            |           |            |                 |   |
|                | 18 | 19 | 20 | 21        | 11 | -19.665600 | 0.5092800 | 1.12000000 | -4.40827012E-02 | - |
| 2.01571006E-02 |    |    |    | 0.0000000 |    |            |           |            |                 |   |
|                | 19 | 20 | 21 | 22        | 11 | -19.665600 | 0.5092800 | 1.12000000 | -4.40827012E-02 | - |
| 2.01571006E-02 |    |    |    | 0.0000000 |    |            |           |            |                 |   |
|                | 20 | 21 | 22 | 23        | 11 | -19.665600 | 0.5092800 | 1.12000000 | -4.40827012E-02 | - |
| 2.01571006E-02 |    |    |    | 0.0000000 |    |            |           |            |                 |   |
|                | 21 | 22 | 23 | 24        | 11 | -19.665600 | 0.5092800 | 1.12000000 | -4.40827012E-02 | - |
| 2.01571006E-02 |    |    |    | 0.0000000 |    |            |           |            |                 |   |
|                | 22 | 23 | 24 | 25        | 11 | -19.665600 | 0.5092800 | 1.12000000 | -4.40827012E-02 | - |
| 2.01571006E-02 |    |    |    | 0.0000000 |    |            |           |            |                 |   |
|                | 23 | 24 | 25 | 26        | 11 | -19.665600 | 0.5092800 | 1.12000000 | -4.40827012E-02 | - |
| 2.01571006E-02 |    |    |    | 0.0000000 |    |            |           |            |                 |   |
|                | 24 | 25 | 26 | 27        | 11 | -19.665600 | 0.5092800 | 1.12000000 | -4.40827012E-02 | - |
| 2.01571006E-02 |    |    |    | 0.0000000 |    |            |           |            |                 |   |
|                | 25 | 26 | 27 | 28        | 11 | -19.665600 | 0.5092800 | 1.12000000 | -4.40827012E-02 | - |
| 2.01571006E-02 |    |    |    | 0.0000000 |    |            |           |            |                 |   |
|                | 26 | 27 | 28 | 29        | 11 | -19.665600 | 0.5092800 | 1.12000000 | -4.40827012E-02 | - |
| 2.01571006E-02 |    |    |    | 0.0000000 |    |            |           |            |                 |   |
|                | 27 | 28 | 29 | 30        | 11 | -19.665600 | 0.5092800 | 1.12000000 | -4.40827012E-02 | - |
| 2.01571006E-02 |    |    |    | 0.0000000 |    |            |           |            |                 |   |
|                | 28 | 29 | 30 | 31        | 11 | -19.665600 | 0.5092800 | 1.12000000 | -4.40827012E-02 | - |
| 2.01571006E-02 |    |    |    | 0.0000000 |    |            |           |            |                 |   |
|                | 29 | 30 | 31 | 32        | 11 | -19.665600 | 0.5092800 | 1.12000000 | -4.40827012E-02 | - |
| 2.01571006E-02 |    |    |    | 0.0000000 |    |            |           |            |                 |   |
|                | 30 | 31 | 32 | 33        | 11 | -19.665600 | 0.5092800 | 1.12000000 | -4.40827012E-02 | - |
| 2.01571006E-02 |    |    |    | 0.0000000 |    |            |           |            |                 |   |
|                | 31 | 32 | 33 | 34        | 11 | -19.665600 | 0.5092800 | 1.12000000 | -4.40827012E-02 | - |
| 2.01571006E-02 |    |    |    | 0.0000000 |    |            |           |            |                 |   |
|                | 32 | 33 | 34 | 35        | 11 | -19.665600 | 0.5092800 | 1.12000000 | -4.40827012E-02 | - |
| 2.01571006E-02 |    |    |    | 0.0000000 |    |            |           |            |                 |   |
|                | 33 | 34 | 35 | 36        | 11 | -19.665600 | 0.5092800 |            |                 |   |

|                |    |    |           |    |            |           |            |                 |   |
|----------------|----|----|-----------|----|------------|-----------|------------|-----------------|---|
| 47             | 48 | 49 | 50        | 11 | -19.665600 | 0.5092800 | 1.12000000 | -4.40827012E-02 | - |
| 2.01571006E-02 |    |    | 0.0000000 |    |            |           |            |                 |   |
| 48             | 49 | 50 | 51        | 11 | -19.665600 | 0.5092800 | 1.12000000 | -4.40827012E-02 | - |
| 2.01571006E-02 |    |    | 0.0000000 |    |            |           |            |                 |   |
| 49             | 50 | 51 | 52        | 11 | -19.665600 | 0.5092800 | 1.12000000 | -4.40827012E-02 | - |
| 2.01571006E-02 |    |    | 0.0000000 |    |            |           |            |                 |   |
| 50             | 51 | 52 | 53        | 11 | -19.665600 | 0.5092800 | 1.12000000 | -4.40827012E-02 | - |
| 2.01571006E-02 |    |    | 0.0000000 |    |            |           |            |                 |   |
| 51             | 52 | 53 | 54        | 11 | -19.665600 | 0.5092800 | 1.12000000 | -4.40827012E-02 | - |
| 2.01571006E-02 |    |    | 0.0000000 |    |            |           |            |                 |   |
| 52             | 53 | 54 | 55        | 11 | -19.665600 | 0.5092800 | 1.12000000 | -4.40827012E-02 | - |
| 2.01571006E-02 |    |    | 0.0000000 |    |            |           |            |                 |   |
| 53             | 54 | 55 | 56        | 11 | -19.665600 | 0.5092800 | 1.12000000 | -4.40827012E-02 | - |
| 2.01571006E-02 |    |    | 0.0000000 |    |            |           |            |                 |   |
| 54             | 55 | 56 | 57        | 11 | -19.665600 | 0.5092800 | 1.12000000 | -4.40827012E-02 | - |
| 2.01571006E-02 |    |    | 0.0000000 |    |            |           |            |                 |   |
| 55             | 56 | 57 | 58        | 11 | -19.665600 | 0.5092800 | 1.12000000 | -4.40827012E-02 | - |
| 2.01571006E-02 |    |    | 0.0000000 |    |            |           |            |                 |   |
| 56             | 57 | 58 | 59        | 11 | -19.665600 | 0.5092800 | 1.12000000 | -4.40827012E-02 | - |
| 2.01571006E-02 |    |    | 0.0000000 |    |            |           |            |                 |   |
| 57             | 58 | 59 | 60        | 11 | -19.665600 | 0.5092800 | 1.12000000 | -4.40827012E-02 | - |
| 2.01571006E-02 |    |    | 0.0000000 |    |            |           |            |                 |   |
| 58             | 59 | 60 | 61        | 11 | -19.665600 | 0.5092800 | 1.12000000 | -4.40827012E-02 | - |
| 2.01571006E-02 |    |    | 0.0000000 |    |            |           |            |                 |   |
| 59             | 60 | 61 | 62        | 11 | -19.665600 | 0.5092800 | 1.12000000 | -4.40827012E-02 | - |
| 2.01571006E-02 |    |    | 0.0000000 |    |            |           |            |                 |   |
| 60             | 61 | 62 | 63        | 11 | -19.665600 | 0.5092800 | 1.12000000 | -4.40827012E-02 | - |
| 2.01571006E-02 |    |    | 0.0000000 |    |            |           |            |                 |   |
| 61             | 62 | 63 | 64        | 11 | -19.665600 | 0.5092800 | 1.12000000 | -4.40827012E-02 | - |
| 2.01571006E-02 |    |    | 0.0000000 |    |            |           |            |                 |   |
| 62             | 63 | 64 | 65        | 11 | -19.665600 | 0.5092800 | 1.12000000 | -4.40827012E-02 | - |
| 2.01571006E-02 |    |    | 0.0000000 |    |            |           |            |                 |   |
| 63             | 64 | 65 | 66        | 11 | -19.665600 | 0.5092800 | 1.12000000 | -4.40827012E-02 | - |
| 2.01571006E-02 |    |    | 0.0000000 |    |            |           |            |                 |   |
| 64             | 65 | 66 | 67        | 11 | -19.665600 | 0.5092800 | 1.12000000 | -4.40827012E-02 | - |
| 2.01571006E-02 |    |    | 0.0000000 |    |            |           |            |                 |   |
| 65             | 66 | 67 | 68        | 11 | -19.665600 | 0.5092800 | 1.12000000 | -4.40827012E-02 | - |
| 2.01571006E-02 |    |    | 0.0000000 |    |            |           |            |                 |   |
| 66             | 67 | 68 | 69        | 11 | -19.665600 | 0.5092800 | 1.12000000 | -4.40827012E-02 | - |
| 2.01571006E-02 |    |    | 0.0000000 |    |            |           |            |                 |   |
| 67             | 68 | 69 | 70        | 11 | -19.665600 | 0.5092800 | 1.12000000 | -4.40827012E-02 | - |
| 2.01571006E-02 |    |    | 0.0000000 |    |            |           |            |                 |   |
| 68             | 69 | 70 | 71        | 11 | -19.665600 | 0.5092800 | 1.12000000 | -4.40827012E-02 | - |
| 2.01571006E-02 |    |    | 0.0000000 |    |            |           |            |                 |   |
| 69             | 70 | 71 | 72        | 11 | -19.665600 | 0.5092800 | 1.12000000 | -4.40827012E-02 | - |
| 2.01571006E-02 |    |    | 0.0000000 |    |            |           |            |                 |   |
| 70             | 71 | 72 | 73        | 11 | -19.665600 | 0.5092800 | 1.         |                 |   |
